# Supplementary material for: Panton–Valentine leucocidin is the key determinant of Staphylococcus aureus pyomyositis in a bacterial GWAS
Source: eLife journal article supplement (doi:10.7554/elife.42486), 2019-02-22
Supplement: supp [file elife-42486-supp-v1.zip]

Archive with 10 entries (10 files):
- elife_poa_e42486_Figure_2_figure_supplement_4.pdf
- elife_poa_e42486_Supplementary_File_4.csv
- elife_poa_e42486_Figure_2_figure_supplement_3.docx
- elife_poa_e42486_Transparent_Reporting_File.pdf
- elife_poa_e42486_Supplementary_file_2.xlsx
- elife_poa_e42486_Figure_2_figure_supplement_1.pdf
- elife_poa_e42486_Figure_2_figure_supplement_2.docx
- elife_poa_e42486_Figure_1_figure_supplement_1.docx
- elife_poa_e42486_Supplementary_file_3.xlsx
- elife_poa_e42486_Supplementary_file_1.docx
