# Supplementary material for: Panton–Valentine leucocidin is the key determinant of Staphylococcus aureus pyomyositis in a bacterial GWAS
Source: eLife journal article supplement (doi:10.7554/elife.42486), 2019-02-22
Supplement: supp [file elife-42486-supp-v1.zip › elife_poa_e42486_Supplementary_file_2.xlsx]

## Sheet: withGEMMA.out.10000.annotated
Signiicant kmers				Mapped position to PYO2134	Best blastn match to S. aureus coding regions									Best blastn match to NCBI database
Kmer_sequence	Pvalue	Present in controls (n)	Present in cases (n)		Evalue	Start position	End position	Length of match	Gene	Product	Accession	Gene_start	Gene_end	Accession	Evalue	Start position	End position	Length of match
AGTTGACCATAACAACTTTTTAATCATAGCA	21.3953	79	98	1573605	0.79	649	664	16	SPSE_0767	major facilitator family transporter[Staphylococcus pseudintermedius ED99]	NC_017568.1	821372	822556	AY954956.1	1e-07	23875	23845	31
GTTGACCATAACAACTTTTTAATCATAGCAC	21.3953	79	98	1573606	0.79	649	664	16	SPSE_0767	major facilitator family transporter[Staphylococcus pseudintermedius ED99]	NC_017568.1	821372	822556	AY954956.1	1e-07	23874	23844	31
TAGTTGACCATAACAACTTTTTAATCATAGC	21.3953	79	98	1573604	0.79	649	664	16	SPSE_0767	major facilitator family transporter[Staphylococcus pseudintermedius ED99]	NC_017568.1	821372	822556	AY954956.1	1e-07	23876	23846	31
TGACCATAACAACTTTTTAATCATAGCACAC	21.3953	79	98	1573608	0.79	649	664	16	SPSE_0767	major facilitator family transporter[Staphylococcus pseudintermedius ED99]	NC_017568.1	821372	822556	AY954956.1	1e-07	23872	23842	31
TGTGTGCTATGATTAAAAAGTTGTTATGGTC	21.3953	79	98	1573609	0.79	664	649	16	SPSE_0767	major facilitator family transporter[Staphylococcus pseudintermedius ED99]	NC_017568.1	821372	822556	AY954956.1	1e-07	23841	23871	31
TTGACCATAACAACTTTTTAATCATAGCACA	21.3953	79	98	1573607	0.79	649	664	16	SPSE_0767	major facilitator family transporter[Staphylococcus pseudintermedius ED99]	NC_017568.1	821372	822556	AY954956.1	1e-07	23873	23843	31
ATATCGTACCAGGTTGGCAAGGTGTGAAAAA	21.0153	57	88	1605152	4e-09	47	77	31	BN843_14710	77ORF049[Staphylococcus aureus M1]	NC_021059.1	1576680	1576844	AY954968.1	1e-07	40532	40562	31
ATCGTACCAGGTTGGCAAGGTGTGAAAAAGA	21.0153	57	88	1605150	4e-09	49	79	31	BN843_14710	77ORF049[Staphylococcus aureus M1]	NC_021059.1	1576680	1576844	AY954968.1	1e-07	40534	40564	31
CATATCGTACCAGGTTGGCAAGGTGTGAAAA	21.0153	57	88	1605153	4e-09	46	76	31	BN843_14710	77ORF049[Staphylococcus aureus M1]	NC_021059.1	1576680	1576844	AY954968.1	1e-07	40531	40561	31
CTTTTTCACACCTTGCCAACCTGGTACGATA	21.0153	57	88	1605151	4e-09	78	48	31	BN843_14710	77ORF049[Staphylococcus aureus M1]	NC_021059.1	1576680	1576844	AY954968.1	1e-07	40563	40533	31
TCGTACCAGGTTGGCAAGGTGTGAAAAAGAC	21.0153	57	88	1605149	4e-09	50	80	31	BN843_14710	77ORF049[Staphylococcus aureus M1]	NC_021059.1	1576680	1576844	AY954968.1	1e-07	40535	40565	31
AAAAATGTAATAAAATTTATAAAGAAAGGAA	20.7155	80	98	1573401	0.22	641	661	21	STP1_2103	isochorismate synthase[Staphylococcus pasteuri SP1]	NC_022737.1	2198502	2199857	AY954956.1	1e-07	24049	24079	31
AAAATGTAATAAAATTTATAAAGAAAGGAAA	20.7155	80	98	1573400	0.22	641	661	21	STP1_2103	isochorismate synthase[Staphylococcus pasteuri SP1]	NC_022737.1	2198502	2199857	AY954956.1	1e-07	24050	24080	31
AAATGTAATAAAATTTATAAAGAAAGGAAAT	20.7155	80	98	1573399	0.22	641	661	21	STP1_2103	isochorismate synthase[Staphylococcus pasteuri SP1]	NC_022737.1	2198502	2199857	AY954956.1	1e-07	24051	24081	31
AAAAAGTTGTTATGGTCAACTATATCGTGGT	20.6561	80	98	1573595	0.79	54	72	19	Sca_2295	hypothetical protein[Staphylococcus carnosus subsp. carnosus TM300]	NC_012121.1	2362055	2362657	AY954956.1	1e-07	23855	23885	31
AAAACCACGATATAGTTGACCATAACAACTT	20.6561	80	98	1573592	0.79	72	54	19	Sca_2295	hypothetical protein[Staphylococcus carnosus subsp. carnosus TM300]	NC_012121.1	2362055	2362657	AY954956.1	1e-07	23888	23858	31
AAAAGTTGTTATGGTCAACTATATCGTGGTT	20.6561	80	98	1573594	0.79	54	72	19	Sca_2295	hypothetical protein[Staphylococcus carnosus subsp. carnosus TM300]	NC_012121.1	2362055	2362657	AY954956.1	1e-07	23856	23886	31
AAACATAAAACCACGATATAGTTGACCATAA	20.6561	80	98	1573586	0.79	72	54	19	Sca_2295	hypothetical protein[Staphylococcus carnosus subsp. carnosus TM300]	NC_012121.1	2362055	2362657	AY954956.1	1e-07	23894	23864	31
AAACCACGATATAGTTGACCATAACAACTTT	20.6561	80	98	1573593	0.79	72	54	19	Sca_2295	hypothetical protein[Staphylococcus carnosus subsp. carnosus TM300]	NC_012121.1	2362055	2362657	AY954956.1	1e-07	23887	23857	31
AACATAAAACCACGATATAGTTGACCATAAC	20.6561	80	98	1573587	0.79	72	54	19	Sca_2295	hypothetical protein[Staphylococcus carnosus subsp. carnosus TM300]	NC_012121.1	2362055	2362657	AY954956.1	1e-07	23893	23863	31
AACTATATCGTGGTTTTATGTTTATTATCAA	20.6561	80	98	1573578	0.017	688	716	29	SAZ172_0490	rRNA small subunit methyltransferase I[Staphylococcus aureus subsp. aureus Z172]	NC_022604.1	547727	548566	AY954956.1	1e-07	23872	23902	31
AATAAACATAAAACCACGATATAGTTGACCA	20.6561	80	98	1573583	2.8	35	15	21	STP1_1254	putative ferrichrome-binding protein[Staphylococcus pasteuri SP1]	NC_022737.1	1318096	1319028	AY954956.1	1e-07	23897	23867	31
ACATAAAACCACGATATAGTTGACCATAACA	20.6561	80	98	1573588	0.79	72	54	19	Sca_2295	hypothetical protein[Staphylococcus carnosus subsp. carnosus TM300]	NC_012121.1	2362055	2362657	AY954956.1	1e-07	23892	23862	31
ACGATATAGTTGACCATAACAACTTTTTAAT	20.6561	80	98	1573598	0.79	72	54	19	Sca_2295	hypothetical protein[Staphylococcus carnosus subsp. carnosus TM300]	NC_012121.1	2362055	2362657	AY954956.1	1e-07	23882	23852	31
ACTATATCGTGGTTTTATGTTTATTATCAAT	20.6561	80	98	1573577	0.005	688	717	30	SAZ172_0490	rRNA small subunit methyltransferase I[Staphylococcus aureus subsp. aureus Z172]	NC_022604.1	547727	548566	AY954956.1	1e-07	23873	23903	31
AGTTGTTATGGTCAACTATATCGTGGTTTTA	20.6561	80	98	1573591	0.79	54	72	19	Sca_2295	hypothetical protein[Staphylococcus carnosus subsp. carnosus TM300]	NC_012121.1	2362055	2362657	AY954956.1	1e-07	23859	23889	31
ATAAAACCACGATATAGTTGACCATAACAAC	20.6561	80	98	1573590	0.79	72	54	19	Sca_2295	hypothetical protein[Staphylococcus carnosus subsp. carnosus TM300]	NC_012121.1	2362055	2362657	AY954956.1	1e-07	23890	23860	31
ATAAACATAAAACCACGATATAGTTGACCAT	20.6561	80	98	1573584	2.8	709	688	22	SAZ172_0490	rRNA small subunit methyltransferase I[Staphylococcus aureus subsp. aureus Z172]	NC_022604.1	547727	548566	AY954956.1	1e-07	23896	23866	31
ATAATAAACATAAAACCACGATATAGTTGAC	20.6561	80	98	1573581	0.22	37	15	23	STP1_1254	putative ferrichrome-binding protein[Staphylococcus pasteuri SP1]	NC_022737.1	1318096	1319028	AY954956.1	1e-07	23899	23869	31
ATAGTTGACCATAACAACTTTTTAATCATAG	20.6561	80	98	1573603	0.79	649	664	16	SPSE_0767	major facilitator family transporter[Staphylococcus pseudintermedius ED99]	NC_017568.1	821372	822556	AY954956.1	1e-07	23877	23847	31
ATATAGTTGACCATAACAACTTTTTAATCAT	20.6561	80	98	1573601	0.79	649	664	16	SPSE_0767	major facilitator family transporter[Staphylococcus pseudintermedius ED99]	NC_017568.1	821372	822556	AY954956.1	1e-07	23879	23849	31
ATATCGTGGTTTTATGTTTATTATCAATCAA	20.6561	80	98	1573574	0.005	688	717	30	SAZ172_0490	rRNA small subunit methyltransferase I[Staphylococcus aureus subsp. aureus Z172]	NC_022604.1	547727	548566	AY954956.1	1e-07	23876	23906	31
ATCGTGGTTTTATGTTTATTATCAATCAAAA	20.6561	80	98	1573572	0.061	690	717	28	SAZ172_0490	rRNA small subunit methyltransferase I[Staphylococcus aureus subsp. aureus Z172]	NC_022604.1	547727	548566	AY954956.1	1e-07	23878	23908	31
ATTTTGATTGATAATAAACATAAAACCACGA	20.6561	80	98	1573571	0.061	2432	2449	18	SAMSHR1132_24670	hypothetical protein[Staphylococcus aureus subsp. aureus MSHR1132]	NC_016941.1	2678703	2681672	AY954956.1	1e-07	23909	23879	31
CAACTATATCGTGGTTTTATGTTTATTATCA	20.6561	80	98	1573579	0.061	688	715	28	SAZ172_0490	rRNA small subunit methyltransferase I[Staphylococcus aureus subsp. aureus Z172]	NC_022604.1	547727	548566	AY954956.1	1e-07	23871	23901	31
CACGATATAGTTGACCATAACAACTTTTTAA	20.6561	80	98	1573597	0.79	72	54	19	Sca_2295	hypothetical protein[Staphylococcus carnosus subsp. carnosus TM300]	NC_012121.1	2362055	2362657	AY954956.1	1e-07	23883	23853	31
CATAAAACCACGATATAGTTGACCATAACAA	20.6561	80	98	1573589	0.79	72	54	19	Sca_2295	hypothetical protein[Staphylococcus carnosus subsp. carnosus TM300]	NC_012121.1	2362055	2362657	AY954956.1	1e-07	23891	23861	31
CCACGATATAGTTGACCATAACAACTTTTTA	20.6561	80	98	1573596	0.79	72	54	19	Sca_2295	hypothetical protein[Staphylococcus carnosus subsp. carnosus TM300]	NC_012121.1	2362055	2362657	AY954956.1	1e-07	23884	23854	31
CGATATAGTTGACCATAACAACTTTTTAATC	20.6561	80	98	1573599	2.8	649	663	15	SPSE_0767	major facilitator family transporter[Staphylococcus pseudintermedius ED99]	NC_017568.1	821372	822556	AY954956.1	1e-07	23881	23851	31
CTATATCGTGGTTTTATGTTTATTATCAATC	20.6561	80	98	1573576	0.005	688	717	30	SAZ172_0490	rRNA small subunit methyltransferase I[Staphylococcus aureus subsp. aureus Z172]	NC_022604.1	547727	548566	AY954956.1	1e-07	23874	23904	31
TAAACATAAAACCACGATATAGTTGACCATA	20.6561	80	98	1573585	2.8	35	55	21	mutS	DNA mismatch repair protein MutS[Staphylococcus lugdunensis N920143]	NC_017353.1	1675433	1678042	AY954956.1	1e-07	23895	23865	31
TAATAAACATAAAACCACGATATAGTTGACC	20.6561	80	98	1573582	0.79	36	15	22	STP1_1254	putative ferrichrome-binding protein[Staphylococcus pasteuri SP1]	NC_022737.1	1318096	1319028	AY954956.1	1e-07	23898	23868	31
TATAGTTGACCATAACAACTTTTTAATCATA	20.6561	80	98	1573602	0.79	649	664	16	SPSE_0767	major facilitator family transporter[Staphylococcus pseudintermedius ED99]	NC_017568.1	821372	822556	AY954956.1	1e-07	23878	23848	31
TATATCGTGGTTTTATGTTTATTATCAATCA	20.6561	80	98	1573575	0.005	688	717	30	SAZ172_0490	rRNA small subunit methyltransferase I[Staphylococcus aureus subsp. aureus Z172]	NC_022604.1	547727	548566	AY954956.1	1e-07	23875	23905	31
TATCGTGGTTTTATGTTTATTATCAATCAAA	20.6561	80	98	1573573	0.017	689	717	29	SAZ172_0490	rRNA small subunit methyltransferase I[Staphylococcus aureus subsp. aureus Z172]	NC_022604.1	547727	548566	AY954956.1	1e-07	23877	23907	31
TCAACTATATCGTGGTTTTATGTTTATTATC	20.6561	80	98	1573580	0.22	15	37	23	STP1_1254	putative ferrichrome-binding protein[Staphylococcus pasteuri SP1]	NC_022737.1	1318096	1319028	AY954956.1	1e-07	23870	23900	31
TGATTAAAAAGTTGTTATGGTCAACTATATC	20.6561	80	98	1573600	0.79	664	649	16	SPSE_0767	major facilitator family transporter[Staphylococcus pseudintermedius ED99]	NC_017568.1	821372	822556	AY954956.1	1e-07	23850	23880	31
AACAACTTTTTAATCATAGCACACAATACGA	20.6561	80	98	1573615	0.061	662	639	25	SAMSHR1132_01610	putative branched-chain amino acid transport system carrier protein[Staphylococcus aureus subsp. aureus MSHR1132]	NC_016941.1	189948	191303	AY954956.1	1e-07	23865	23835	31
ACAACTTTTTAATCATAGCACACAATACGAA	20.6561	80	98	1573616	0.061	662	639	25	SAMSHR1132_01610	putative branched-chain amino acid transport system carrier protein[Staphylococcus aureus subsp. aureus MSHR1132]	NC_016941.1	189948	191303	AY954956.1	1e-07	23864	23834	31
ACCATAACAACTTTTTAATCATAGCACACAA	20.6561	80	98	1573610	0.79	710	692	20	SAZ172_1369	Transcription antiterminator[Staphylococcus aureus subsp. aureus Z172]	NC_022604.1	1453769	1454620	AY954956.1	1e-07	23870	23840	31
ATAACAACTTTTTAATCATAGCACACAATAC	20.6561	80	98	1573613	0.061	662	639	25	SAMSHR1132_01610	putative branched-chain amino acid transport system carrier protein[Staphylococcus aureus subsp. aureus MSHR1132]	NC_016941.1	189948	191303	AY954956.1	1e-07	23867	23837	31
ATTGTGTGCTATGATTAAAAAGTTGTTATGG	20.6561	80	98	1573611	0.22	640	662	24	SAMSHR1132_01610	putative branched-chain amino acid transport system carrier protein[Staphylococcus aureus subsp. aureus MSHR1132]	NC_016941.1	189948	191303	AY954956.1	1e-07	23839	23869	31
CAACTTTTTAATCATAGCACACAATACGAAC	20.6561	80	98	1573617	0.061	662	639	25	SAMSHR1132_01610	putative branched-chain amino acid transport system carrier protein[Staphylococcus aureus subsp. aureus MSHR1132]	NC_016941.1	189948	191303	AY954956.1	1e-07	23863	23833	31
CATAACAACTTTTTAATCATAGCACACAATA	20.6561	80	98	1573612	0.061	662	639	25	SAMSHR1132_01610	putative branched-chain amino acid transport system carrier protein[Staphylococcus aureus subsp. aureus MSHR1132]	NC_016941.1	189948	191303	AY954956.1	1e-07	23868	23838	31
CGTATTGTGTGCTATGATTAAAAAGTTGTTA	20.6561	80	98	1573614	0.061	639	662	25	SAMSHR1132_01610	putative branched-chain amino acid transport system carrier protein[Staphylococcus aureus subsp. aureus MSHR1132]	NC_016941.1	189948	191303	AY954956.1	1e-07	23836	23866	31
AAATAATTTATATTTTGATTGATAATAAACA	20.6561	80	98	1573560	0.061	151	125	28	A284_01785	hypothetical protein[Staphylococcus warneri SG1]	NC_020164.1	394889	395296	AY954956.1	1e-07	23920	23890	31
AAATTATAAATAATTTATATTTTGATTGATA	20.6561	80	98	1573553	0.005	542	516	27	SAZ172_0610	Hypothetical protein[Staphylococcus aureus subsp. aureus Z172]	NC_022604.1	686532	687173	AY954956.1	1e-07	23927	23897	31
AATAATTTATATTTTGATTGATAATAAACAT	20.6561	80	98	1573561	0.061	151	125	28	A284_01785	hypothetical protein[Staphylococcus warneri SG1]	NC_020164.1	394889	395296	AY954956.1	1e-07	23919	23889	31
AATTATAAATAATTTATATTTTGATTGATAA	20.6561	80	98	1573554	0.017	538	516	23	SAZ172_0610	Hypothetical protein[Staphylococcus aureus subsp. aureus Z172]	NC_022604.1	686532	687173	AY954956.1	1e-07	23926	23896	31
AATTTATATTTTGATTGATAATAAACATAAA	20.6561	80	98	1573564	0.22	281	300	20	SA40_0866	hypothetical protein[Staphylococcus aureus subsp. aureus SA40]	NC_022443.1	958682	959668	AY954956.1	1e-07	23916	23886	31
ATAAATAATTTATATTTTGATTGATAATAAA	20.6561	80	98	1573558	0.061	151	125	28	A284_01785	hypothetical protein[Staphylococcus warneri SG1]	NC_020164.1	394889	395296	AY954956.1	1e-07	23922	23892	31
ATAATTTATATTTTGATTGATAATAAACATA	20.6561	80	98	1573562	0.061	225	199	28	tanA	tannase TanA[Staphylococcus lugdunensis N920143]	NC_017353.1	416890	418731	AY954956.1	1e-07	23918	23888	31
ATATTTTGATTGATAATAAACATAAAACCAC	20.6561	80	98	1573569	0.061	2432	2449	18	SAMSHR1132_24670	hypothetical protein[Staphylococcus aureus subsp. aureus MSHR1132]	NC_016941.1	2678703	2681672	AY954956.1	1e-07	23911	23881	31
ATCAATCAAAATATAAATTATTTATAATTTG	20.6561	80	98	1573552	0.001	516	543	28	SAZ172_0610	Hypothetical protein[Staphylococcus aureus subsp. aureus Z172]	NC_022604.1	686532	687173	AY954956.1	1e-07	23898	23928	31
ATTATAAATAATTTATATTTTGATTGATAAT	20.6561	80	98	1573555	0.017	538	516	23	SAZ172_0610	Hypothetical protein[Staphylococcus aureus subsp. aureus Z172]	NC_022604.1	686532	687173	AY954956.1	1e-07	23925	23895	31
ATTTATATTTTGATTGATAATAAACATAAAA	20.6561	80	98	1573565	0.061	2432	2449	18	SAMSHR1132_24670	hypothetical protein[Staphylococcus aureus subsp. aureus MSHR1132]	NC_016941.1	2678703	2681672	AY954956.1	1e-07	23915	23885	31
CGTGGTTTTATGTTTATTATCAATCAAAATA	20.6561	80	98	1573570	0.061	2449	2432	18	SAMSHR1132_24670	hypothetical protein[Staphylococcus aureus subsp. aureus MSHR1132]	NC_016941.1	2678703	2681672	AY954956.1	1e-07	23880	23910	31
TAAATAATTTATATTTTGATTGATAATAAAC	20.6561	80	98	1573559	0.061	151	125	28	A284_01785	hypothetical protein[Staphylococcus warneri SG1]	NC_020164.1	394889	395296	AY954956.1	1e-07	23921	23891	31
TAATTTATATTTTGATTGATAATAAACATAA	20.6561	80	98	1573563	0.061	134	154	21	SE1917	hypothetical protein[Staphylococcus epidermidis ATCC 12228]	NC_004461.1	1953378	1953851	AY954956.1	1e-07	23917	23887	31
TATAAATAATTTATATTTTGATTGATAATAA	20.6561	80	98	1573557	0.061	537	516	22	SAZ172_0610	Hypothetical protein[Staphylococcus aureus subsp. aureus Z172]	NC_022604.1	686532	687173	AY954956.1	1e-07	23923	23893	31
TATATTTTGATTGATAATAAACATAAAACCA	20.6561	80	98	1573568	0.061	2432	2449	18	SAMSHR1132_24670	hypothetical protein[Staphylococcus aureus subsp. aureus MSHR1132]	NC_016941.1	2678703	2681672	AY954956.1	1e-07	23912	23882	31
TATTATCAATCAAAATATAAATTATTTATAA	20.6561	80	98	1573556	0.017	516	538	23	SAZ172_0610	Hypothetical protein[Staphylococcus aureus subsp. aureus Z172]	NC_022604.1	686532	687173	AY954956.1	1e-07	23894	23924	31
TTATATTTTGATTGATAATAAACATAAAACC	20.6561	80	98	1573567	0.061	2432	2449	18	SAMSHR1132_24670	hypothetical protein[Staphylococcus aureus subsp. aureus MSHR1132]	NC_016941.1	2678703	2681672	AY954956.1	1e-07	23913	23883	31
TTTATATTTTGATTGATAATAAACATAAAAC	20.6561	80	98	1573566	0.061	2432	2449	18	SAMSHR1132_24670	hypothetical protein[Staphylococcus aureus subsp. aureus MSHR1132]	NC_016941.1	2678703	2681672	AY954956.1	1e-07	23914	23884	31
AAAAATCATTTCCTTTCTTTATAAATTTTAT	19.9709	81	98	1573392	0.79	1105	1090	16	A284_10760	GntR family transcriptional regulator[Staphylococcus warneri SG1]	NC_020164.1	2260124	2261509	AY954956.1	1e-07	24088	24058	31
AAAATCATTTCCTTTCTTTATAAATTTTATT	19.9709	81	98	1573393	0.79	1105	1090	16	A284_10760	GntR family transcriptional regulator[Staphylococcus warneri SG1]	NC_020164.1	2260124	2261509	AY954956.1	1e-07	24087	24057	31
AAAATTTATAAAGAAAGGAAATGATTTTTAT	19.9709	81	98	1573390	0.79	1090	1105	16	A284_10760	GntR family transcriptional regulator[Staphylococcus warneri SG1]	NC_020164.1	2260124	2261509	AY954956.1	1e-07	24060	24090	31
AAAGAAAGGAAATGATTTTTATGGTCAAAAA	19.9709	81	98	1573381	0.79	297	282	16	SPSE_0213	MFS family major facilitator transporter, hexose phosphate:cation symporter[Staphylococcus pseudintermedius ED99]	NC_017568.1	246452	247831	AY954956.1	1e-07	24069	24099	31
AAAGGAAATGATTTTTATGGTCAAAAAAAGA	19.9709	81	98	1573377	0.79	297	282	16	SPSE_0213	MFS family major facilitator transporter, hexose phosphate:cation symporter[Staphylococcus pseudintermedius ED99]	NC_017568.1	246452	247831	AY954956.1	1e-07	24073	24103	31
AAATCATTTCCTTTCTTTATAAATTTTATTA	19.9709	81	98	1573394	0.22	661	641	21	STP1_2103	isochorismate synthase[Staphylococcus pasteuri SP1]	NC_022737.1	2198502	2199857	AY954956.1	1e-07	24086	24056	31
AAATGATTTTTATGGTCAAAAAAAGACTATT	19.9709	81	98	1573372	2.8	807	824	18	SAZ172_1934	Aldehyde dehydrogenase[Staphylococcus aureus subsp. aureus Z172]	NC_022604.1	2090889	2092268	AY954956.1	1e-07	24078	24108	31
AAATTTATAAAGAAAGGAAATGATTTTTATG	19.9709	81	98	1573389	0.79	297	282	16	SPSE_0213	MFS family major facilitator transporter, hexose phosphate:cation symporter[Staphylococcus pseudintermedius ED99]	NC_017568.1	246452	247831	AY954956.1	1e-07	24061	24091	31
AAGAAAGGAAATGATTTTTATGGTCAAAAAA	19.9709	81	98	1573380	0.79	297	282	16	SPSE_0213	MFS family major facilitator transporter, hexose phosphate:cation symporter[Staphylococcus pseudintermedius ED99]	NC_017568.1	246452	247831	AY954956.1	1e-07	24070	24100	31
AAGGAAATGATTTTTATGGTCAAAAAAAGAC	19.9709	81	98	1573376	0.79	433	451	19	SLUG_18140	putative inosine-uridine preferring nucleoside hydrolase[Staphylococcus lugdunensis N920143]	NC_017353.1	1912142	1913050	AY954956.1	1e-07	24074	24104	31
AATCATTTCCTTTCTTTATAAATTTTATTAC	19.9709	81	98	1573395	0.22	661	641	21	STP1_2103	isochorismate synthase[Staphylococcus pasteuri SP1]	NC_022737.1	2198502	2199857	AY954956.1	1e-07	24085	24055	31
AATGTAATAAAATTTATAAAGAAAGGAAATG	19.9709	81	98	1573398	0.22	641	661	21	STP1_2103	isochorismate synthase[Staphylococcus pasteuri SP1]	NC_022737.1	2198502	2199857	AY954956.1	1e-07	24052	24082	31
AATTTATAAAGAAAGGAAATGATTTTTATGG	19.9709	81	98	1573388	0.79	297	282	16	SPSE_0213	MFS family major facilitator transporter, hexose phosphate:cation symporter[Staphylococcus pseudintermedius ED99]	NC_017568.1	246452	247831	AY954956.1	1e-07	24062	24092	31
ACCATAAAAATCATTTCCTTTCTTTATAAAT	19.9709	81	98	1573387	0.79	282	297	16	SPSE_0213	MFS family major facilitator transporter, hexose phosphate:cation symporter[Staphylococcus pseudintermedius ED99]	NC_017568.1	246452	247831	AY954956.1	1e-07	24093	24063	31
AGAAAGGAAATGATTTTTATGGTCAAAAAAA	19.9709	81	98	1573379	0.79	297	282	16	SPSE_0213	MFS family major facilitator transporter, hexose phosphate:cation symporter[Staphylococcus pseudintermedius ED99]	NC_017568.1	246452	247831	AY954956.1	1e-07	24071	24101	31
AGTCTTTTTTTGACCATAAAAATCATTTCCT	19.9709	81	98	1573375	2.8	824	807	18	SAZ172_1934	Aldehyde dehydrogenase[Staphylococcus aureus subsp. aureus Z172]	NC_022604.1	2090889	2092268	AY954956.1	1e-07	24105	24075	31
ATAAAGAAAGGAAATGATTTTTATGGTCAAA	19.9709	81	98	1573383	0.79	297	282	16	SPSE_0213	MFS family major facilitator transporter, hexose phosphate:cation symporter[Staphylococcus pseudintermedius ED99]	NC_017568.1	246452	247831	AY954956.1	1e-07	24067	24097	31
ATAGTCTTTTTTTGACCATAAAAATCATTTC	19.9709	81	98	1573373	2.8	824	807	18	SAZ172_1934	Aldehyde dehydrogenase[Staphylococcus aureus subsp. aureus Z172]	NC_022604.1	2090889	2092268	AY954956.1	1e-07	24107	24077	31
ATCATTTCCTTTCTTTATAAATTTTATTACA	19.9709	81	98	1573396	0.22	661	641	21	STP1_2103	isochorismate synthase[Staphylococcus pasteuri SP1]	NC_022737.1	2198502	2199857	AY954956.1	1e-07	24084	24054	31
ATGTAATAAAATTTATAAAGAAAGGAAATGA	19.9709	81	98	1573397	0.22	641	661	21	STP1_2103	isochorismate synthase[Staphylococcus pasteuri SP1]	NC_022737.1	2198502	2199857	AY954956.1	1e-07	24053	24083	31
CTTTTTTTGACCATAAAAATCATTTCCTTTC	19.9709	81	98	1573378	0.79	282	297	16	SPSE_0213	MFS family major facilitator transporter, hexose phosphate:cation symporter[Staphylococcus pseudintermedius ED99]	NC_017568.1	246452	247831	AY954956.1	1e-07	24102	24072	31
TAAAAATCATTTCCTTTCTTTATAAATTTTA	19.9709	81	98	1573391	0.79	1105	1090	16	A284_10760	GntR family transcriptional regulator[Staphylococcus warneri SG1]	NC_020164.1	2260124	2261509	AY954956.1	1e-07	24089	24059	31
TAAAGAAAGGAAATGATTTTTATGGTCAAAA	19.9709	81	98	1573382	0.79	297	282	16	SPSE_0213	MFS family major facilitator transporter, hexose phosphate:cation symporter[Staphylococcus pseudintermedius ED99]	NC_017568.1	246452	247831	AY954956.1	1e-07	24068	24098	31
TAGTCTTTTTTTGACCATAAAAATCATTTCC	19.9709	81	98	1573374	2.8	824	807	18	SAZ172_1934	Aldehyde dehydrogenase[Staphylococcus aureus subsp. aureus Z172]	NC_022604.1	2090889	2092268	AY954956.1	1e-07	24106	24076	31
TATAAAGAAAGGAAATGATTTTTATGGTCAA	19.9709	81	98	1573384	0.79	297	282	16	SPSE_0213	MFS family major facilitator transporter, hexose phosphate:cation symporter[Staphylococcus pseudintermedius ED99]	NC_017568.1	246452	247831	AY954956.1	1e-07	24066	24096	31
TTATAAAGAAAGGAAATGATTTTTATGGTCA	19.9709	81	98	1573385	0.79	297	282	16	SPSE_0213	MFS family major facilitator transporter, hexose phosphate:cation symporter[Staphylococcus pseudintermedius ED99]	NC_017568.1	246452	247831	AY954956.1	1e-07	24065	24095	31
TTTATAAAGAAAGGAAATGATTTTTATGGTC	19.9709	81	98	1573386	0.79	297	282	16	SPSE_0213	MFS family major facilitator transporter, hexose phosphate:cation symporter[Staphylococcus pseudintermedius ED99]	NC_017568.1	246452	247831	AY954956.1	1e-07	24064	24094	31
AAATTATTTTGTGTTCGTATTGTGTGCTATG	19.9295	81	98	1573629	0.79	306	287	20	MS7_0629	hypothetical protein[Staphylococcus aureus subsp. aureus 11819-97]	NC_017351.1	668937	669281	AY954956.1	1e-07	23821	23851	31
AACTTTTTAATCATAGCACACAATACGAACA	19.9295	81	98	1573618	0.061	662	639	25	SAMSHR1132_01610	putative branched-chain amino acid transport system carrier protein[Staphylococcus aureus subsp. aureus MSHR1132]	NC_016941.1	189948	191303	AY954956.1	1e-07	23862	23832	31
AATCATAGCACACAATACGAACACAAAATAA	19.9295	81	98	1573626	NA	NA	NA	NA	NA	NA	NA	NA	NA	AY954956.1	1e-07	23854	23824	31
AATTATTTTGTGTTCGTATTGTGTGCTATGA	19.9295	81	98	1573628	0.79	306	287	20	MS7_0629	hypothetical protein[Staphylococcus aureus subsp. aureus 11819-97]	NC_017351.1	668937	669281	AY954956.1	1e-07	23822	23852	31
ACTTTTTAATCATAGCACACAATACGAACAC	19.9295	81	98	1573619	0.22	661	639	24	SAMSHR1132_01610	putative branched-chain amino acid transport system carrier protein[Staphylococcus aureus subsp. aureus MSHR1132]	NC_016941.1	189948	191303	AY954956.1	1e-07	23861	23831	31
AGCACACAATACGAACACAAAATAATTTATA	19.9295	81	98	1573632	0.79	287	306	20	MS7_0629	hypothetical protein[Staphylococcus aureus subsp. aureus 11819-97]	NC_017351.1	668937	669281	AY954956.1	1e-07	23848	23818	31
ATAAATTATTTTGTGTTCGTATTGTGTGCTA	19.9295	81	98	1573631	0.79	306	287	20	MS7_0629	hypothetical protein[Staphylococcus aureus subsp. aureus 11819-97]	NC_017351.1	668937	669281	AY954956.1	1e-07	23819	23849	31
ATAGCACACAATACGAACACAAAATAATTTA	19.9295	81	98	1573630	0.79	287	306	20	MS7_0629	hypothetical protein[Staphylococcus aureus subsp. aureus 11819-97]	NC_017351.1	668937	669281	AY954956.1	1e-07	23850	23820	31
ATATAAATTATTTTGTGTTCGTATTGTGTGC	19.9295	81	98	1573633	0.22	422	397	27	SAZ172_0360	Cystathionine beta-lyase[Staphylococcus aureus subsp. aureus Z172]	NC_022604.1	408583	409743	AY954956.1	1e-07	23817	23847	31
ATCATAGCACACAATACGAACACAAAATAAT	19.9295	81	98	1573627	0.79	287	306	20	MS7_0629	hypothetical protein[Staphylococcus aureus subsp. aureus 11819-97]	NC_017351.1	668937	669281	AY954956.1	1e-07	23853	23823	31
ATTTTGTGTTCGTATTGTGTGCTATGATTAA	19.9295	81	98	1573624	NA	NA	NA	NA	NA	NA	NA	NA	NA	AY954956.1	1e-07	23826	23856	31
CACACAATACGAACACAAAATAATTTATATA	19.9295	81	98	1573634	0.22	397	422	27	SAZ172_0360	Cystathionine beta-lyase[Staphylococcus aureus subsp. aureus Z172]	NC_022604.1	408583	409743	AY954956.1	1e-07	23846	23816	31
CTTTTTAATCATAGCACACAATACGAACACA	19.9295	81	98	1573620	0.79	710	692	20	SAZ172_1369	Transcription antiterminator[Staphylococcus aureus subsp. aureus Z172]	NC_022604.1	1453769	1454620	AY954956.1	1e-07	23860	23830	31
TAATCATAGCACACAATACGAACACAAAATA	19.9295	81	98	1573625	NA	NA	NA	NA	NA	NA	NA	NA	NA	AY954956.1	1e-07	23855	23825	31
TTTAATCATAGCACACAATACGAACACAAAA	19.9295	81	98	1573623	NA	NA	NA	NA	NA	NA	NA	NA	NA	AY954956.1	1e-07	23857	23827	31
TTTTAATCATAGCACACAATACGAACACAAA	19.9295	81	98	1573622	2.8	709	692	19	SAZ172_1369	Transcription antiterminator[Staphylococcus aureus subsp. aureus Z172]	NC_022604.1	1453769	1454620	AY954956.1	1e-07	23858	23828	31
TTTTTAATCATAGCACACAATACGAACACAA	19.9295	81	98	1573621	0.79	710	692	20	SAZ172_1369	Transcription antiterminator[Staphylococcus aureus subsp. aureus Z172]	NC_022604.1	1453769	1454620	AY954956.1	1e-07	23859	23829	31
AATGATTTTTATGGTCAAAAAAAGACTATTA	19.2412	82	98	1573371	2.8	807	824	18	SAZ172_1934	Aldehyde dehydrogenase[Staphylococcus aureus subsp. aureus Z172]	NC_022604.1	2090889	2092268	AY954956.1	1e-07	24079	24109	31
AGCTAATAGTCTTTTTTTGACCATAAAAATC	19.2412	82	98	1573368	3e-05	24	1	24	lukS-PV	Panton-Valentine leukocidin chain S precursor[Staphylococcus aureus subsp. aureus SA957]	NC_022442.1	1534859	1535797	AY954956.1	1e-07	24112	24082	31
ATGATTTTTATGGTCAAAAAAAGACTATTAG	19.2412	82	98	1573370	2.8	807	824	18	SAZ172_1934	Aldehyde dehydrogenase[Staphylococcus aureus subsp. aureus Z172]	NC_022604.1	2090889	2092268	AY954956.1	1e-07	24080	24110	31
ATGTTGCAGCTAATAGTCTTTTTTTGACCAT	19.2412	82	98	1573361	4e-09	31	1	31	lukS-PV	Panton-Valentine leukocidin chain S precursor[Staphylococcus aureus subsp. aureus SA957]	NC_022442.1	1534859	1535797	AY954956.1	1e-07	24119	24089	31
ATTTTTATGGTCAAAAAAAGACTATTAGCTG	19.2412	82	98	1573367	8e-06	1	25	25	lukS-PV	Panton-Valentine leukocidin chain S precursor[Staphylococcus aureus subsp. aureus SA957]	NC_022442.1	1534859	1535797	AY954956.1	1e-07	24083	24113	31
TATGGTCAAAAAAAGACTATTAGCTGCAACA	19.2412	82	98	1573362	1e-08	1	30	30	lukS-PV	Panton-Valentine leukocidin chain S precursor[Staphylococcus aureus subsp. aureus SA957]	NC_022442.1	1534859	1535797	AY954956.1	1e-07	24088	24118	31
TGATTTTTATGGTCAAAAAAAGACTATTAGC	19.2412	82	98	1573369	0.0001	1	23	23	lukS-PV	Panton-Valentine leukocidin chain S precursor[Staphylococcus aureus subsp. aureus SA957]	NC_022442.1	1534859	1535797	AY954956.1	1e-07	24081	24111	31
TTATGGTCAAAAAAAGACTATTAGCTGCAAC	19.2412	82	98	1573363	5e-08	1	29	29	lukS-PV	Panton-Valentine leukocidin chain S precursor[Staphylococcus aureus subsp. aureus SA957]	NC_022442.1	1534859	1535797	AY954956.1	1e-07	24087	24117	31
TTTATGGTCAAAAAAAGACTATTAGCTGCAA	19.2412	82	98	1573364	2e-07	1	28	28	lukS-PV	Panton-Valentine leukocidin chain S precursor[Staphylococcus aureus subsp. aureus SA957]	NC_022442.1	1534859	1535797	AY954956.1	1e-07	24086	24116	31
TTTTATGGTCAAAAAAAGACTATTAGCTGCA	19.2412	82	98	1573365	6e-07	1	27	27	lukS-PV	Panton-Valentine leukocidin chain S precursor[Staphylococcus aureus subsp. aureus SA957]	NC_022442.1	1534859	1535797	AY954956.1	1e-07	24085	24115	31
TTTTTATGGTCAAAAAAAGACTATTAGCTGC	19.2412	82	98	1573366	2e-06	1	26	26	lukS-PV	Panton-Valentine leukocidin chain S precursor[Staphylococcus aureus subsp. aureus SA957]	NC_022442.1	1534859	1535797	AY954956.1	1e-07	24084	24114	31
AAAAAAACAAACGTTTTTAGTATATAAATTA	19.2153	82	98	1573654	0.79	33	6	29	C248_2102	transposase[Staphylococcus aureus 08BA02176]	NC_018608.1	2122812	2124128	AY954956.1	1e-07	23796	23826	31
AAAAAACAAACGTTTTTAGTATATAAATTAT	19.2153	82	98	1573653	0.22	33	5	30	C248_2102	transposase[Staphylococcus aureus 08BA02176]	NC_018608.1	2122812	2124128	AY954956.1	1e-07	23797	23827	31
AAAAACAAACGTTTTTAGTATATAAATTATT	19.2153	82	98	1573652	0.061	33	4	31	C248_2102	transposase[Staphylococcus aureus 08BA02176]	NC_018608.1	2122812	2124128	AY954956.1	1e-07	23798	23828	31
AAAAACGTTTGTTTTTTTAAAATTTAATATA	19.2153	82	98	1573667	0.79	558	543	16	SAZ172_0228	Glycerophosphoryl diester phosphodiesterase, periplasmic[Staphylococcus aureus subsp. aureus Z172]	NC_022604.1	263693	265456	AY954956.1	1e-07	23813	23783	31
AAAAATTAACTGTTTATTAATTTTAAATAAT	19.2153	82	98	1573705	0.061	249	279	31	recG	ATP-dependent DNA helicase[Staphylococcus aureus subsp. aureus SA40]	NC_022443.1	1200092	1202152	AY954956.1	1e-07	23775	23745	31
AAAACAAACGTTTTTAGTATATAAATTATTT	19.2153	82	98	1573651	0.061	33	4	31	C248_2102	transposase[Staphylococcus aureus 08BA02176]	NC_018608.1	2122812	2124128	AY954956.1	1e-07	23799	23829	31
AAAACGTTTGTTTTTTTAAAATTTAATATAT	19.2153	82	98	1573668	0.22	489	505	17	SPSE_0030	putative DNA methyltransferase[Staphylococcus pseudintermedius ED99]	NC_017568.1	33257	35017	AY954956.1	1e-07	23812	23782	31
AAAATAATTTATATACTAAAAACGTTTGTTT	19.2153	82	98	1573650	0.061	621	596	28	SE0918	hypothetical protein[Staphylococcus epidermidis ATCC 12228]	NC_004461.1	917566	919839	AY954956.1	1e-07	23830	23800	31
AAAATTAACTGTTTATTAATTTTAAATAATA	19.2153	82	98	1573706	0.017	249	280	32	recG	ATP-dependent DNA helicase[Staphylococcus aureus subsp. aureus SA40]	NC_022443.1	1200092	1202152	AY954956.1	1e-07	23774	23744	31
AAACGTTTGTTTTTTTAAAATTTAATATATT	19.2153	82	98	1573669	0.061	489	506	18	SPSE_0030	putative DNA methyltransferase[Staphylococcus pseudintermedius ED99]	NC_017568.1	33257	35017	AY954956.1	1e-07	23811	23781	31
AAACGTTTTTAGTATATAAATTATTTTGTGT	19.2153	82	98	1573646	0.79	725	700	26	STP1_0135	DEAD/DEAH box helicase[Staphylococcus pasteuri SP1]	NC_022737.1	161988	163331	AY954956.1	1e-07	23804	23834	31
AAATTAACTGTTTATTAATTTTAAATAATAG	19.2153	82	98	1573707	0.017	195	168	29	SSP0248	ABC transporter periplasmic protein[Staphylococcus saprophyticus subsp. saprophyticus ATCC 15305]	NC_007350.1	277150	277968	AY954956.1	1e-07	23773	23743	31
AAATTTTAAAAAAACAAACGTTTTTAGTATA	19.2153	82	98	1573661	0.79	33	12	22	C248_2102	transposase[Staphylococcus aureus 08BA02176]	NC_018608.1	2122812	2124128	AY954956.1	1e-07	23789	23819	31
AACAAACGTTTTTAGTATATAAATTATTTTG	19.2153	82	98	1573649	0.061	596	621	28	SE0918	hypothetical protein[Staphylococcus epidermidis ATCC 12228]	NC_004461.1	917566	919839	AY954956.1	1e-07	23801	23831	31
AACACAAAATAATTTATATACTAAAAACGTT	19.2153	82	98	1573645	0.22	699	725	27	STP1_0135	DEAD/DEAH box helicase[Staphylococcus pasteuri SP1]	NC_022737.1	161988	163331	AY954956.1	1e-07	23835	23805	31
AAGTACCTGCCTAAGATTCATCATATACAAT	19.2153	82	98	1573748	2.8	787	764	25	SAZ172_1107	Phage major capsid protein[Staphylococcus aureus subsp. aureus Z172]	NC_022604.1	1172314	1173138	AY954956.1	1e-07	23732	23702	31
AATACGAACACAAAATAATTTATATACTAAA	19.2153	82	98	1573639	0.22	699	725	27	STP1_0135	DEAD/DEAH box helicase[Staphylococcus pasteuri SP1]	NC_022737.1	161988	163331	AY954956.1	1e-07	23841	23811	31
AATTAACTGTTTATTAATTTTAAATAATAGG	19.2153	82	98	1573708	0.017	195	168	29	SSP0248	ABC transporter periplasmic protein[Staphylococcus saprophyticus subsp. saprophyticus ATCC 15305]	NC_007350.1	277150	277968	AY954956.1	1e-07	23772	23742	31
AATTGTATATGATGAATCTTAGGCAGGTACT	19.2153	82	98	1573749	2.8	764	787	25	SAZ172_1107	Phage major capsid protein[Staphylococcus aureus subsp. aureus Z172]	NC_022604.1	1172314	1173138	AY954956.1	1e-07	23701	23731	31
AATTTATATACTAAAAACGTTTGTTTTTTTA	19.2153	82	98	1573655	0.79	12	33	22	C248_2102	transposase[Staphylococcus aureus 08BA02176]	NC_018608.1	2122812	2124128	AY954956.1	1e-07	23825	23795	31
AATTTTAAAAAAACAAACGTTTTTAGTATAT	19.2153	82	98	1573660	0.79	33	12	22	C248_2102	transposase[Staphylococcus aureus 08BA02176]	NC_018608.1	2122812	2124128	AY954956.1	1e-07	23790	23820	31
ACAAAATAATTTATATACTAAAAACGTTTGT	19.2153	82	98	1573648	0.061	621	596	28	SE0918	hypothetical protein[Staphylococcus epidermidis ATCC 12228]	NC_004461.1	917566	919839	AY954956.1	1e-07	23832	23802	31
ACAATACGAACACAAAATAATTTATATACTA	19.2153	82	98	1573637	0.22	397	422	27	SAZ172_0360	Cystathionine beta-lyase[Staphylococcus aureus subsp. aureus Z172]	NC_022604.1	408583	409743	AY954956.1	1e-07	23843	23813	31
ACACAATACGAACACAAAATAATTTATATAC	19.2153	82	98	1573635	0.22	397	422	27	SAZ172_0360	Cystathionine beta-lyase[Staphylococcus aureus subsp. aureus Z172]	NC_022604.1	408583	409743	AY954956.1	1e-07	23845	23815	31
ACGAACACAAAATAATTTATATACTAAAAAC	19.2153	82	98	1573642	0.22	699	725	27	STP1_0135	DEAD/DEAH box helicase[Staphylococcus pasteuri SP1]	NC_022737.1	161988	163331	AY954956.1	1e-07	23838	23808	31
ACGTTTTTAGTATATAAATTATTTTGTGTTC	19.2153	82	98	1573644	0.22	725	699	27	STP1_0135	DEAD/DEAH box helicase[Staphylococcus pasteuri SP1]	NC_022737.1	161988	163331	AY954956.1	1e-07	23806	23836	31
ACTAAAAACGTTTGTTTTTTTAAAATTTAAT	19.2153	82	98	1573664	2.8	308	294	15	SLUG_15340	prephenate dehydrogenase[Staphylococcus lugdunensis N920143]	NC_017353.1	1603993	1605084	AY954956.1	1e-07	23816	23786	31
AGTATATAAATTATTTTGTGTTCGTATTGTG	19.2153	82	98	1573636	0.22	422	397	27	SAZ172_0360	Cystathionine beta-lyase[Staphylococcus aureus subsp. aureus Z172]	NC_022604.1	408583	409743	AY954956.1	1e-07	23814	23844	31
ATAATTGTATATGATGAATCTTAGGCAGGTA	19.2153	82	98	1573751	0.79	770	785	16	atpA	ATP synthase subunit alpha[Staphylococcus lugdunensis N920143]	NC_017353.1	1008524	1010032	AY954956.1	1e-07	23699	23729	31
ATACGAACACAAAATAATTTATATACTAAAA	19.2153	82	98	1573640	0.22	699	725	27	STP1_0135	DEAD/DEAH box helicase[Staphylococcus pasteuri SP1]	NC_022737.1	161988	163331	AY954956.1	1e-07	23840	23810	31
ATACTAAAAACGTTTGTTTTTTTAAAATTTA	19.2153	82	98	1573662	2.8	13	33	21	C248_2102	transposase[Staphylococcus aureus 08BA02176]	NC_018608.1	2122812	2124128	AY954956.1	1e-07	23818	23788	31
ATATTAAATTTTAAAAAAACAAACGTTTTTA	19.2153	82	98	1573666	0.79	621	643	23	SLUG_15150	hypothetical protein[Staphylococcus lugdunensis N920143]	NC_017353.1	1588998	1589837	AY954956.1	1e-07	23784	23814	31
ATGTAAAAATTAACTGTTTATTAATTTTAAA	19.2153	82	98	1573701	0.22	1238	1264	27	STP1_0317	polysaccharide biosynthesis protein[Staphylococcus pasteuri SP1]	NC_022737.1	358568	360229	AY954956.1	1e-07	23779	23749	31
ATTAACTGTTTATTAATTTTAAATAATAGGC	19.2153	82	98	1573709	0.017	195	168	29	SSP0248	ABC transporter periplasmic protein[Staphylococcus saprophyticus subsp. saprophyticus ATCC 15305]	NC_007350.1	277150	277968	AY954956.1	1e-07	23771	23741	31
ATTTAAAATTAATAAACAGTTAATTTTTACA	19.2153	82	98	1573702	0.22	1264	1238	27	STP1_0317	polysaccharide biosynthesis protein[Staphylococcus pasteuri SP1]	NC_022737.1	358568	360229	AY954956.1	1e-07	23748	23778	31
ATTTATATACTAAAAACGTTTGTTTTTTTAA	19.2153	82	98	1573656	0.79	12	33	22	C248_2102	transposase[Staphylococcus aureus 08BA02176]	NC_018608.1	2122812	2124128	AY954956.1	1e-07	23824	23794	31
ATTTTAAAAAAACAAACGTTTTTAGTATATA	19.2153	82	98	1573659	0.79	33	12	22	C248_2102	transposase[Staphylococcus aureus 08BA02176]	NC_018608.1	2122812	2124128	AY954956.1	1e-07	23791	23821	31
CAAACGTTTTTAGTATATAAATTATTTTGTG	19.2153	82	98	1573647	0.22	597	621	27	SE0918	hypothetical protein[Staphylococcus epidermidis ATCC 12228]	NC_004461.1	917566	919839	AY954956.1	1e-07	23803	23833	31
CAATACGAACACAAAATAATTTATATACTAA	19.2153	82	98	1573638	0.22	397	422	27	SAZ172_0360	Cystathionine beta-lyase[Staphylococcus aureus subsp. aureus Z172]	NC_022604.1	408583	409743	AY954956.1	1e-07	23842	23812	31
CGAACACAAAATAATTTATATACTAAAAACG	19.2153	82	98	1573643	0.22	699	725	27	STP1_0135	DEAD/DEAH box helicase[Staphylococcus pasteuri SP1]	NC_022737.1	161988	163331	AY954956.1	1e-07	23837	23807	31
CGAAGTACCTGCCTAAGATTCATCATATACA	19.2153	82	98	1573746	2.8	787	767	21	SAZ172_1107	Phage major capsid protein[Staphylococcus aureus subsp. aureus Z172]	NC_022604.1	1172314	1173138	AY954956.1	1e-07	23734	23704	31
CTAAAAACGTTTGTTTTTTTAAAATTTAATA	19.2153	82	98	1573665	0.79	643	621	23	SLUG_15150	hypothetical protein[Staphylococcus lugdunensis N920143]	NC_017353.1	1588998	1589837	AY954956.1	1e-07	23815	23785	31
TAAAAATTAACTGTTTATTAATTTTAAATAA	19.2153	82	98	1573704	0.22	1238	1264	27	STP1_0317	polysaccharide biosynthesis protein[Staphylococcus pasteuri SP1]	NC_022737.1	358568	360229	AY954956.1	1e-07	23776	23746	31
TAACTGTTTATTAATTTTAAATAATAGGCAA	19.2153	82	98	1573711	0.017	1482	1461	22	SAMSHR1132_24760	accessory Sec system asp1[Staphylococcus aureus subsp. aureus MSHR1132]	NC_016941.1	2694580	2696133	AY954956.1	1e-07	23769	23739	31
TAATTGTATATGATGAATCTTAGGCAGGTAC	19.2153	82	98	1573750	0.79	770	785	16	atpA	ATP synthase subunit alpha[Staphylococcus lugdunensis N920143]	NC_017353.1	1008524	1010032	AY954956.1	1e-07	23700	23730	31
TACGAACACAAAATAATTTATATACTAAAAA	19.2153	82	98	1573641	0.22	699	725	27	STP1_0135	DEAD/DEAH box helicase[Staphylococcus pasteuri SP1]	NC_022737.1	161988	163331	AY954956.1	1e-07	23839	23809	31
TACTAAAAACGTTTGTTTTTTTAAAATTTAA	19.2153	82	98	1573663	2.8	308	294	15	SLUG_15340	prephenate dehydrogenase[Staphylococcus lugdunensis N920143]	NC_017353.1	1603993	1605084	AY954956.1	1e-07	23817	23787	31
TATTTAAAATTAATAAACAGTTAATTTTTAC	19.2153	82	98	1573703	0.22	1264	1238	27	STP1_0317	polysaccharide biosynthesis protein[Staphylococcus pasteuri SP1]	NC_022737.1	358568	360229	AY954956.1	1e-07	23747	23777	31
TTAACTGTTTATTAATTTTAAATAATAGGCA	19.2153	82	98	1573710	0.017	1482	1461	22	SAMSHR1132_24760	accessory Sec system asp1[Staphylococcus aureus subsp. aureus MSHR1132]	NC_016941.1	2694580	2696133	AY954956.1	1e-07	23770	23740	31
TTATATACTAAAAACGTTTGTTTTTTTAAAA	19.2153	82	98	1573658	0.79	12	33	22	C248_2102	transposase[Staphylococcus aureus 08BA02176]	NC_018608.1	2122812	2124128	AY954956.1	1e-07	23822	23792	31
TTGTATATGATGAATCTTAGGCAGGTACTTC	19.2153	82	98	1573747	2.8	767	787	21	SAZ172_1107	Phage major capsid protein[Staphylococcus aureus subsp. aureus Z172]	NC_022604.1	1172314	1173138	AY954956.1	1e-07	23703	23733	31
TTTAAAAAAACAAACGTTTTTAGTATATAAA	19.2153	82	98	1573657	0.79	33	12	22	C248_2102	transposase[Staphylococcus aureus 08BA02176]	NC_018608.1	2122812	2124128	AY954956.1	1e-07	23793	23823	31
AAATCTTTTAATAAATATTTAATTTTATTAA	18.9422	80	97	1573452	0.005	958	936	23	ldh2	L-lactate dehydrogenase 2[Staphylococcus aureus subsp. aureus LGA251]	NC_017349.1	2618199	2619158	AY954956.1	1e-07	23998	24028	31
AATAAAATTAAATATTTATTAAAAGATTTAC	18.9422	80	97	1573454	0.005	936	958	23	ldh2	L-lactate dehydrogenase 2[Staphylococcus aureus subsp. aureus LGA251]	NC_017349.1	2618199	2619158	AY954956.1	1e-07	24026	23996	31
ATAAAATTAAATATTTATTAAAAGATTTACC	18.9422	80	97	1573455	0.005	936	958	23	ldh2	L-lactate dehydrogenase 2[Staphylococcus aureus subsp. aureus LGA251]	NC_017349.1	2618199	2619158	AY954956.1	1e-07	24025	23995	31
TAAATCTTTTAATAAATATTTAATTTTATTA	18.9422	80	97	1573453	0.005	958	936	23	ldh2	L-lactate dehydrogenase 2[Staphylococcus aureus subsp. aureus LGA251]	NC_017349.1	2618199	2619158	AY954956.1	1e-07	23997	24027	31
AATATAAAAATGTAATAAAATTTATAAAGAA	18.8909	80	97	1573406	0.017	1546	1521	26	C248_0061	hypothetical protein[Staphylococcus aureus 08BA02176]	NC_018608.1	66785	68989	AY954956.1	1e-07	24044	24074	31
ATAAAAATGTAATAAAATTTATAAAGAAAGG	18.8909	80	97	1573403	0.22	641	661	21	STP1_2103	isochorismate synthase[Staphylococcus pasteuri SP1]	NC_022737.1	2198502	2199857	AY954956.1	1e-07	24047	24077	31
ATATAAAAATGTAATAAAATTTATAAAGAAA	18.8909	80	97	1573405	0.061	1545	1521	25	C248_0061	hypothetical protein[Staphylococcus aureus 08BA02176]	NC_018608.1	66785	68989	AY954956.1	1e-07	24045	24075	31
CTTTCTTTATAAATTTTATTACATTTTTATA	18.8909	80	97	1573404	0.22	661	641	21	STP1_2103	isochorismate synthase[Staphylococcus pasteuri SP1]	NC_022737.1	2198502	2199857	AY954956.1	1e-07	24076	24046	31
TAAAAATGTAATAAAATTTATAAAGAAAGGA	18.8909	80	97	1573402	0.22	641	661	21	STP1_2103	isochorismate synthase[Staphylococcus pasteuri SP1]	NC_022737.1	2198502	2199857	AY954956.1	1e-07	24048	24078	31
AACAAATTATAAATAATTTATATTTTGATTG	18.7928	80	97	1573550	0.0001	545	516	30	SAZ172_0610	Hypothetical protein[Staphylococcus aureus subsp. aureus Z172]	NC_022604.1	686532	687173	AY954956.1	1e-07	23930	23900	31
ACAAATTATAAATAATTTATATTTTGATTGA	18.7928	80	97	1573551	0.0004	544	516	29	SAZ172_0610	Hypothetical protein[Staphylococcus aureus subsp. aureus Z172]	NC_022604.1	686532	687173	AY954956.1	1e-07	23929	23899	31
AAATTATCTACCTAAAAATAAAATAGATTCA	18.6006	83	98	1573002	4e-09	360	390	31	lukS-PV	Panton-Valentine leukocidin chain S precursor[Staphylococcus aureus subsp. aureus SA957]	NC_022442.1	1534859	1535797	AY954956.1	1e-07	24448	24478	31
AATAAATTATCTACCTAAAAATAAAATAGAT	18.6006	83	98	1573005	4e-09	357	387	31	lukS-PV	Panton-Valentine leukocidin chain S precursor[Staphylococcus aureus subsp. aureus SA957]	NC_022442.1	1534859	1535797	AY954956.1	1e-07	24445	24475	31
AATCTATTTTATTTTTAGGTAGATAATTTAT	18.6006	83	98	1573004	4e-09	388	358	31	lukS-PV	Panton-Valentine leukocidin chain S precursor[Staphylococcus aureus subsp. aureus SA957]	NC_022442.1	1534859	1535797	AY954956.1	1e-07	24476	24446	31
AATGACCCCAATGTAGATTTAATAAATTATC	18.6006	83	98	1573025	4e-09	337	367	31	lukS-PV	Panton-Valentine leukocidin chain S precursor[Staphylococcus aureus subsp. aureus SA957]	NC_022442.1	1534859	1535797	AY954956.1	1e-07	24425	24455	31
AATGTAGATTTAATAAATTATCTACCTAAAA	18.6006	83	98	1573016	4e-09	346	376	31	lukS-PV	Panton-Valentine leukocidin chain S precursor[Staphylococcus aureus subsp. aureus SA957]	NC_022442.1	1534859	1535797	AY954956.1	1e-07	24434	24464	31
AATTATCTACCTAAAAATAAAATAGATTCAG	18.6006	83	98	1573001	4e-09	361	391	31	lukS-PV	Panton-Valentine leukocidin chain S precursor[Staphylococcus aureus subsp. aureus SA957]	NC_022442.1	1534859	1535797	AY954956.1	1e-07	24449	24479	31
ACCCCAATGTAGATTTAATAAATTATCTACC	18.6006	83	98	1573021	4e-09	341	371	31	lukS-PV	Panton-Valentine leukocidin chain S precursor[Staphylococcus aureus subsp. aureus SA957]	NC_022442.1	1534859	1535797	AY954956.1	1e-07	24429	24459	31
ACTGAATCTATTTTATTTTTAGGTAGATAAT	18.6006	83	98	1573000	4e-09	392	362	31	lukS-PV	Panton-Valentine leukocidin chain S precursor[Staphylococcus aureus subsp. aureus SA957]	NC_022442.1	1534859	1535797	AY954956.1	1e-07	24480	24450	31
AGATTTAATAAATTATCTACCTAAAAATAAA	18.6006	83	98	1573011	4e-09	351	381	31	lukS-PV	Panton-Valentine leukocidin chain S precursor[Staphylococcus aureus subsp. aureus SA957]	NC_022442.1	1534859	1535797	AY954956.1	1e-07	24439	24469	31
AGGTAGATAATTTATTAAATCTACATTGGGG	18.6006	83	98	1573020	4e-09	372	342	31	lukS-PV	Panton-Valentine leukocidin chain S precursor[Staphylococcus aureus subsp. aureus SA957]	NC_022442.1	1534859	1535797	AY954956.1	1e-07	24460	24430	31
ATCTACCTAAAAATAAAATAGATTCAGTAAA	18.6006	83	98	1572997	4e-09	365	395	31	lukS-PV	Panton-Valentine leukocidin chain S precursor[Staphylococcus aureus subsp. aureus SA957]	NC_022442.1	1534859	1535797	AY954956.1	1e-07	24453	24483	31
ATGACCCCAATGTAGATTTAATAAATTATCT	18.6006	83	98	1573024	4e-09	338	368	31	lukS-PV	Panton-Valentine leukocidin chain S precursor[Staphylococcus aureus subsp. aureus SA957]	NC_022442.1	1534859	1535797	AY954956.1	1e-07	24426	24456	31
ATGTAGATTTAATAAATTATCTACCTAAAAA	18.6006	83	98	1573015	4e-09	347	377	31	lukS-PV	Panton-Valentine leukocidin chain S precursor[Staphylococcus aureus subsp. aureus SA957]	NC_022442.1	1534859	1535797	AY954956.1	1e-07	24435	24465	31
ATTTAATAAATTATCTACCTAAAAATAAAAT	18.6006	83	98	1573009	4e-09	353	383	31	lukS-PV	Panton-Valentine leukocidin chain S precursor[Staphylococcus aureus subsp. aureus SA957]	NC_022442.1	1534859	1535797	AY954956.1	1e-07	24441	24471	31
ATTTACTGAATCTATTTTATTTTTAGGTAGA	18.6006	83	98	1572996	4e-09	396	366	31	lukS-PV	Panton-Valentine leukocidin chain S precursor[Staphylococcus aureus subsp. aureus SA957]	NC_022442.1	1534859	1535797	AY954956.1	1e-07	24484	24454	31
ATTTTTAGGTAGATAATTTATTAAATCTACA	18.6006	83	98	1573014	4e-09	378	348	31	lukS-PV	Panton-Valentine leukocidin chain S precursor[Staphylococcus aureus subsp. aureus SA957]	NC_022442.1	1534859	1535797	AY954956.1	1e-07	24466	24436	31
CAATGTAGATTTAATAAATTATCTACCTAAA	18.6006	83	98	1573017	4e-09	345	375	31	lukS-PV	Panton-Valentine leukocidin chain S precursor[Staphylococcus aureus subsp. aureus SA957]	NC_022442.1	1534859	1535797	AY954956.1	1e-07	24433	24463	31
CATTTACTGAATCTATTTTATTTTTAGGTAG	18.6006	83	98	1572995	4e-09	397	367	31	lukS-PV	Panton-Valentine leukocidin chain S precursor[Staphylococcus aureus subsp. aureus SA957]	NC_022442.1	1534859	1535797	AY954956.1	1e-07	24485	24455	31
CCAATGTAGATTTAATAAATTATCTACCTAA	18.6006	83	98	1573018	4e-09	344	374	31	lukS-PV	Panton-Valentine leukocidin chain S precursor[Staphylococcus aureus subsp. aureus SA957]	NC_022442.1	1534859	1535797	AY954956.1	1e-07	24432	24462	31
CCCAATGTAGATTTAATAAATTATCTACCTA	18.6006	83	98	1573019	4e-09	343	373	31	lukS-PV	Panton-Valentine leukocidin chain S precursor[Staphylococcus aureus subsp. aureus SA957]	NC_022442.1	1534859	1535797	AY954956.1	1e-07	24431	24461	31
CTATTTTATTTTTAGGTAGATAATTTATTAA	18.6006	83	98	1573007	4e-09	385	355	31	lukS-PV	Panton-Valentine leukocidin chain S precursor[Staphylococcus aureus subsp. aureus SA957]	NC_022442.1	1534859	1535797	AY954956.1	1e-07	24473	24443	31
GACCCCAATGTAGATTTAATAAATTATCTAC	18.6006	83	98	1573022	4e-09	340	370	31	lukS-PV	Panton-Valentine leukocidin chain S precursor[Staphylococcus aureus subsp. aureus SA957]	NC_022442.1	1534859	1535797	AY954956.1	1e-07	24428	24458	31
TAAATTATCTACCTAAAAATAAAATAGATTC	18.6006	83	98	1573003	4e-09	359	389	31	lukS-PV	Panton-Valentine leukocidin chain S precursor[Staphylococcus aureus subsp. aureus SA957]	NC_022442.1	1534859	1535797	AY954956.1	1e-07	24447	24477	31
TAATAAATTATCTACCTAAAAATAAAATAGA	18.6006	83	98	1573006	4e-09	356	386	31	lukS-PV	Panton-Valentine leukocidin chain S precursor[Staphylococcus aureus subsp. aureus SA957]	NC_022442.1	1534859	1535797	AY954956.1	1e-07	24444	24474	31
TACTGAATCTATTTTATTTTTAGGTAGATAA	18.6006	83	98	1572999	4e-09	393	363	31	lukS-PV	Panton-Valentine leukocidin chain S precursor[Staphylococcus aureus subsp. aureus SA957]	NC_022442.1	1534859	1535797	AY954956.1	1e-07	24481	24451	31
TAGATAATTTATTAAATCTACATTGGGGTCA	18.6006	83	98	1573023	4e-09	369	339	31	lukS-PV	Panton-Valentine leukocidin chain S precursor[Staphylococcus aureus subsp. aureus SA957]	NC_022442.1	1534859	1535797	AY954956.1	1e-07	24457	24427	31
TAGATTTAATAAATTATCTACCTAAAAATAA	18.6006	83	98	1573012	4e-09	350	380	31	lukS-PV	Panton-Valentine leukocidin chain S precursor[Staphylococcus aureus subsp. aureus SA957]	NC_022442.1	1534859	1535797	AY954956.1	1e-07	24438	24468	31
TATCTACCTAAAAATAAAATAGATTCAGTAA	18.6006	83	98	1572998	4e-09	364	394	31	lukS-PV	Panton-Valentine leukocidin chain S precursor[Staphylococcus aureus subsp. aureus SA957]	NC_022442.1	1534859	1535797	AY954956.1	1e-07	24452	24482	31
TATTTTATTTTTAGGTAGATAATTTATTAAA	18.6006	83	98	1573008	4e-09	384	354	31	lukS-PV	Panton-Valentine leukocidin chain S precursor[Staphylococcus aureus subsp. aureus SA957]	NC_022442.1	1534859	1535797	AY954956.1	1e-07	24472	24442	31
TATTTTTAGGTAGATAATTTATTAAATCTAC	18.6006	83	98	1573013	4e-09	379	349	31	lukS-PV	Panton-Valentine leukocidin chain S precursor[Staphylococcus aureus subsp. aureus SA957]	NC_022442.1	1534859	1535797	AY954956.1	1e-07	24467	24437	31
TTTTATTTTTAGGTAGATAATTTATTAAATC	18.6006	83	98	1573010	4e-09	382	352	31	lukS-PV	Panton-Valentine leukocidin chain S precursor[Staphylococcus aureus subsp. aureus SA957]	NC_022442.1	1534859	1535797	AY954956.1	1e-07	24470	24440	31
AAAAAAAGACTATTAGCTGCAACATTGTCGT	18.6003	83	98	1573355	4e-09	7	37	31	lukS-PV	Panton-Valentine leukocidin chain S precursor[Staphylococcus aureus subsp. aureus SA957]	NC_022442.1	1534859	1535797	AY954956.1	1e-07	24095	24125	31
AAAAAAGACTATTAGCTGCAACATTGTCGTT	18.6003	83	98	1573354	4e-09	8	38	31	lukS-PV	Panton-Valentine leukocidin chain S precursor[Staphylococcus aureus subsp. aureus SA957]	NC_022442.1	1534859	1535797	AY954956.1	1e-07	24096	24126	31
AAAAAGACTATTAGCTGCAACATTGTCGTTA	18.6003	83	98	1573353	4e-09	9	39	31	lukS-PV	Panton-Valentine leukocidin chain S precursor[Staphylococcus aureus subsp. aureus SA957]	NC_022442.1	1534859	1535797	AY954956.1	1e-07	24097	24127	31
AAAAGACTATTAGCTGCAACATTGTCGTTAG	18.6003	83	98	1573352	4e-09	10	40	31	lukS-PV	Panton-Valentine leukocidin chain S precursor[Staphylococcus aureus subsp. aureus SA957]	NC_022442.1	1534859	1535797	AY954956.1	1e-07	24098	24128	31
AAAGACTATTAGCTGCAACATTGTCGTTAGG	18.6003	83	98	1573351	4e-09	11	41	31	lukS-PV	Panton-Valentine leukocidin chain S precursor[Staphylococcus aureus subsp. aureus SA957]	NC_022442.1	1534859	1535797	AY954956.1	1e-07	24099	24129	31
AACATTGTCGTTAGGAATAATCACTCCTATT	18.6003	83	98	1573335	4e-09	27	57	31	lukS-PV	Panton-Valentine leukocidin chain S precursor[Staphylococcus aureus subsp. aureus SA957]	NC_022442.1	1534859	1535797	AY954956.1	1e-07	24115	24145	31
AAGACTATTAGCTGCAACATTGTCGTTAGGA	18.6003	83	98	1573350	4e-09	12	42	31	lukS-PV	Panton-Valentine leukocidin chain S precursor[Staphylococcus aureus subsp. aureus SA957]	NC_022442.1	1534859	1535797	AY954956.1	1e-07	24100	24130	31
AATGTTGCAGCTAATAGTCTTTTTTTGACCA	18.6003	83	98	1573360	4e-09	32	2	31	lukS-PV	Panton-Valentine leukocidin chain S precursor[Staphylococcus aureus subsp. aureus SA957]	NC_022442.1	1534859	1535797	AY954956.1	1e-07	24120	24090	31
ACAATGTTGCAGCTAATAGTCTTTTTTTGAC	18.6003	83	98	1573358	4e-09	34	4	31	lukS-PV	Panton-Valentine leukocidin chain S precursor[Staphylococcus aureus subsp. aureus SA957]	NC_022442.1	1534859	1535797	AY954956.1	1e-07	24122	24092	31
ACATTGTCGTTAGGAATAATCACTCCTATTG	18.6003	83	98	1573334	4e-09	28	58	31	lukS-PV	Panton-Valentine leukocidin chain S precursor[Staphylococcus aureus subsp. aureus SA957]	NC_022442.1	1534859	1535797	AY954956.1	1e-07	24116	24146	31
ACTATTAGCTGCAACATTGTCGTTAGGAATA	18.6003	83	98	1573347	4e-09	15	45	31	lukS-PV	Panton-Valentine leukocidin chain S precursor[Staphylococcus aureus subsp. aureus SA957]	NC_022442.1	1534859	1535797	AY954956.1	1e-07	24103	24133	31
AGACTATTAGCTGCAACATTGTCGTTAGGAA	18.6003	83	98	1573349	4e-09	13	43	31	lukS-PV	Panton-Valentine leukocidin chain S precursor[Staphylococcus aureus subsp. aureus SA957]	NC_022442.1	1534859	1535797	AY954956.1	1e-07	24101	24131	31
AGCTGCAACATTGTCGTTAGGAATAATCACT	18.6003	83	98	1573341	4e-09	21	51	31	lukS-PV	Panton-Valentine leukocidin chain S precursor[Staphylococcus aureus subsp. aureus SA957]	NC_022442.1	1534859	1535797	AY954956.1	1e-07	24109	24139	31
AGGAGTGATTATTCCTAACGACAATGTTGCA	18.6003	83	98	1573338	4e-09	54	24	31	lukS-PV	Panton-Valentine leukocidin chain S precursor[Staphylococcus aureus subsp. aureus SA957]	NC_022442.1	1534859	1535797	AY954956.1	1e-07	24142	24112	31
ATAGGAGTGATTATTCCTAACGACAATGTTG	18.6003	83	98	1573336	4e-09	56	26	31	lukS-PV	Panton-Valentine leukocidin chain S precursor[Staphylococcus aureus subsp. aureus SA957]	NC_022442.1	1534859	1535797	AY954956.1	1e-07	24144	24114	31
ATTAGCTGCAACATTGTCGTTAGGAATAATC	18.6003	83	98	1573344	4e-09	18	48	31	lukS-PV	Panton-Valentine leukocidin chain S precursor[Staphylococcus aureus subsp. aureus SA957]	NC_022442.1	1534859	1535797	AY954956.1	1e-07	24106	24136	31
ATTATTCCTAACGACAATGTTGCAGCTAATA	18.6003	83	98	1573345	4e-09	47	17	31	lukS-PV	Panton-Valentine leukocidin chain S precursor[Staphylococcus aureus subsp. aureus SA957]	NC_022442.1	1534859	1535797	AY954956.1	1e-07	24135	24105	31
ATTCCTAACGACAATGTTGCAGCTAATAGTC	18.6003	83	98	1573348	4e-09	44	14	31	lukS-PV	Panton-Valentine leukocidin chain S precursor[Staphylococcus aureus subsp. aureus SA957]	NC_022442.1	1534859	1535797	AY954956.1	1e-07	24132	24102	31
ATTGTCGTTAGGAATAATCACTCCTATTGCT	18.6003	83	98	1573332	4e-09	30	60	31	lukS-PV	Panton-Valentine leukocidin chain S precursor[Staphylococcus aureus subsp. aureus SA957]	NC_022442.1	1534859	1535797	AY954956.1	1e-07	24118	24148	31
CAAAAAAAGACTATTAGCTGCAACATTGTCG	18.6003	83	98	1573356	4e-09	6	36	31	lukS-PV	Panton-Valentine leukocidin chain S precursor[Staphylococcus aureus subsp. aureus SA957]	NC_022442.1	1534859	1535797	AY954956.1	1e-07	24094	24124	31
CAATGTTGCAGCTAATAGTCTTTTTTTGACC	18.6003	83	98	1573359	4e-09	33	3	31	lukS-PV	Panton-Valentine leukocidin chain S precursor[Staphylococcus aureus subsp. aureus SA957]	NC_022442.1	1534859	1535797	AY954956.1	1e-07	24121	24091	31
CATTGTCGTTAGGAATAATCACTCCTATTGC	18.6003	83	98	1573333	4e-09	29	59	31	lukS-PV	Panton-Valentine leukocidin chain S precursor[Staphylococcus aureus subsp. aureus SA957]	NC_022442.1	1534859	1535797	AY954956.1	1e-07	24117	24147	31
CTATTAGCTGCAACATTGTCGTTAGGAATAA	18.6003	83	98	1573346	4e-09	16	46	31	lukS-PV	Panton-Valentine leukocidin chain S precursor[Staphylococcus aureus subsp. aureus SA957]	NC_022442.1	1534859	1535797	AY954956.1	1e-07	24104	24134	31
CTGCAACATTGTCGTTAGGAATAATCACTCC	18.6003	83	98	1573339	4e-09	23	53	31	lukS-PV	Panton-Valentine leukocidin chain S precursor[Staphylococcus aureus subsp. aureus SA957]	NC_022442.1	1534859	1535797	AY954956.1	1e-07	24111	24141	31
GAGTGATTATTCCTAACGACAATGTTGCAGC	18.6003	83	98	1573340	4e-09	52	22	31	lukS-PV	Panton-Valentine leukocidin chain S precursor[Staphylococcus aureus subsp. aureus SA957]	NC_022442.1	1534859	1535797	AY954956.1	1e-07	24140	24110	31
TAGCTGCAACATTGTCGTTAGGAATAATCAC	18.6003	83	98	1573342	4e-09	20	50	31	lukS-PV	Panton-Valentine leukocidin chain S precursor[Staphylococcus aureus subsp. aureus SA957]	NC_022442.1	1534859	1535797	AY954956.1	1e-07	24108	24138	31
TAGGAGTGATTATTCCTAACGACAATGTTGC	18.6003	83	98	1573337	4e-09	55	25	31	lukS-PV	Panton-Valentine leukocidin chain S precursor[Staphylococcus aureus subsp. aureus SA957]	NC_022442.1	1534859	1535797	AY954956.1	1e-07	24143	24113	31
TCAAAAAAAGACTATTAGCTGCAACATTGTC	18.6003	83	98	1573357	4e-09	5	35	31	lukS-PV	Panton-Valentine leukocidin chain S precursor[Staphylococcus aureus subsp. aureus SA957]	NC_022442.1	1534859	1535797	AY954956.1	1e-07	24093	24123	31
TTAGCTGCAACATTGTCGTTAGGAATAATCA	18.6003	83	98	1573343	4e-09	19	49	31	lukS-PV	Panton-Valentine leukocidin chain S precursor[Staphylococcus aureus subsp. aureus SA957]	NC_022442.1	1534859	1535797	AY954956.1	1e-07	24107	24137	31
AAAATTGGTTGGGATGTTGAAGCACATAAAA	18.5268	83	98	1571869	4e-09	553	583	31	lukF-PV	Panton-Valentine leukocidin chain F precursor[Staphylococcus aureus subsp. aureus SA957]	NC_022442.1	1533880	1534857	BA000033.2	1e-07	1529806	1529776	31
AAATTGGTTGGGATGTTGAAGCACATAAAAT	18.5268	83	98	1571868	4e-09	554	584	31	lukF-PV	Panton-Valentine leukocidin chain F precursor[Staphylococcus aureus subsp. aureus SA957]	NC_022442.1	1533880	1534857	BA000033.2	1e-07	1529805	1529775	31
AATTATGAATAATGGTTGGGGACCATATGGC	18.5268	83	98	1571840	4e-09	582	612	31	lukF-PV	Panton-Valentine leukocidin chain F precursor[Staphylococcus aureus subsp. aureus SA957]	NC_022442.1	1533880	1534857	BA000033.2	1e-07	1529777	1529747	31
AATTTTATGTGCTTCAACATCCCAACCAATT	18.5268	83	98	1571867	4e-09	585	555	31	lukF-PV	Panton-Valentine leukocidin chain F precursor[Staphylococcus aureus subsp. aureus SA957]	NC_022442.1	1533880	1534857	BA000033.2	1e-07	1529774	1529804	31
ACATAAAATTATGAATAATGGTTGGGGACCA	18.5268	83	98	1571846	4e-09	576	606	31	lukF-PV	Panton-Valentine leukocidin chain F precursor[Staphylococcus aureus subsp. aureus SA957]	NC_022442.1	1533880	1534857	BA000033.2	1e-07	1529783	1529753	31
ACCATTATTCATAATTTTATGTGCTTCAACA	18.5268	83	98	1571855	4e-09	597	567	31	lukF-PV	Panton-Valentine leukocidin chain F precursor[Staphylococcus aureus subsp. aureus SA957]	NC_022442.1	1533880	1534857	BA000033.2	1e-07	1529762	1529792	31
ATAAAATTATGAATAATGGTTGGGGACCATA	18.5268	83	98	1571844	4e-09	578	608	31	lukF-PV	Panton-Valentine leukocidin chain F precursor[Staphylococcus aureus subsp. aureus SA957]	NC_022442.1	1533880	1534857	BA000033.2	1e-07	1529781	1529751	31
ATAATTTTATGTGCTTCAACATCCCAACCAA	18.5268	83	98	1571865	4e-09	587	557	31	lukF-PV	Panton-Valentine leukocidin chain F precursor[Staphylococcus aureus subsp. aureus SA957]	NC_022442.1	1533880	1534857	BA000033.2	1e-07	1529772	1529802	31
ATATGGTCCCCAACCATTATTCATAATTTTA	18.5268	83	98	1571843	4e-09	609	579	31	lukF-PV	Panton-Valentine leukocidin chain F precursor[Staphylococcus aureus subsp. aureus SA957]	NC_022442.1	1533880	1534857	BA000033.2	1e-07	1529750	1529780	31
ATGGTCCCCAACCATTATTCATAATTTTATG	18.5268	83	98	1571845	4e-09	607	577	31	lukF-PV	Panton-Valentine leukocidin chain F precursor[Staphylococcus aureus subsp. aureus SA957]	NC_022442.1	1533880	1534857	BA000033.2	1e-07	1529752	1529782	31
ATGTTGAAGCACATAAAATTATGAATAATGG	18.5268	83	98	1571856	4e-09	566	596	31	lukF-PV	Panton-Valentine leukocidin chain F precursor[Staphylococcus aureus subsp. aureus SA957]	NC_022442.1	1533880	1534857	BA000033.2	1e-07	1529793	1529763	31
ATTATGAATAATGGTTGGGGACCATATGGCA	18.5268	83	98	1571839	4e-09	583	613	31	lukF-PV	Panton-Valentine leukocidin chain F precursor[Staphylococcus aureus subsp. aureus SA957]	NC_022442.1	1533880	1534857	BA000033.2	1e-07	1529776	1529746	31
ATTATTCATAATTTTATGTGCTTCAACATCC	18.5268	83	98	1571858	4e-09	594	564	31	lukF-PV	Panton-Valentine leukocidin chain F precursor[Staphylococcus aureus subsp. aureus SA957]	NC_022442.1	1533880	1534857	BA000033.2	1e-07	1529765	1529795	31
ATTCATAATTTTATGTGCTTCAACATCCCAA	18.5268	83	98	1571861	4e-09	591	561	31	lukF-PV	Panton-Valentine leukocidin chain F precursor[Staphylococcus aureus subsp. aureus SA957]	NC_022442.1	1533880	1534857	BA000033.2	1e-07	1529768	1529798	31
ATTGGTTGGGATGTTGAAGCACATAAAATTA	18.5268	83	98	1571866	4e-09	556	586	31	lukF-PV	Panton-Valentine leukocidin chain F precursor[Staphylococcus aureus subsp. aureus SA957]	NC_022442.1	1533880	1534857	BA000033.2	1e-07	1529803	1529773	31
CATAATTTTATGTGCTTCAACATCCCAACCA	18.5268	83	98	1571864	4e-09	588	558	31	lukF-PV	Panton-Valentine leukocidin chain F precursor[Staphylococcus aureus subsp. aureus SA957]	NC_022442.1	1533880	1534857	BA000033.2	1e-07	1529771	1529801	31
CATTATTCATAATTTTATGTGCTTCAACATC	18.5268	83	98	1571857	4e-09	595	565	31	lukF-PV	Panton-Valentine leukocidin chain F precursor[Staphylococcus aureus subsp. aureus SA957]	NC_022442.1	1533880	1534857	BA000033.2	1e-07	1529764	1529794	31
TATTCATAATTTTATGTGCTTCAACATCCCA	18.5268	83	98	1571860	4e-09	592	562	31	lukF-PV	Panton-Valentine leukocidin chain F precursor[Staphylococcus aureus subsp. aureus SA957]	NC_022442.1	1533880	1534857	BA000033.2	1e-07	1529767	1529797	31
TCATAATTTTATGTGCTTCAACATCCCAACC	18.5268	83	98	1571863	4e-09	589	559	31	lukF-PV	Panton-Valentine leukocidin chain F precursor[Staphylococcus aureus subsp. aureus SA957]	NC_022442.1	1533880	1534857	BA000033.2	1e-07	1529770	1529800	31
TTATTCATAATTTTATGTGCTTCAACATCCC	18.5268	83	98	1571859	4e-09	593	563	31	lukF-PV	Panton-Valentine leukocidin chain F precursor[Staphylococcus aureus subsp. aureus SA957]	NC_022442.1	1533880	1534857	BA000033.2	1e-07	1529766	1529796	31
TTCATAATTTTATGTGCTTCAACATCCCAAC	18.5268	83	98	1571862	4e-09	590	560	31	lukF-PV	Panton-Valentine leukocidin chain F precursor[Staphylococcus aureus subsp. aureus SA957]	NC_022442.1	1533880	1534857	BA000033.2	1e-07	1529769	1529799	31
ACACCTTGCCAACCTGGTACGATATGTCCGT	18.35	56	86	1605158	4e-09	71	41	31	BN843_14710	77ORF049[Staphylococcus aureus M1]	NC_021059.1	1576680	1576844	AY954968.1	7e-05	40556	40531	26
ACATATCGTACCAGGTTGGCAAGGTGTGAAA	18.35	56	86	1605154	4e-09	45	75	31	BN843_14710	77ORF049[Staphylococcus aureus M1]	NC_021059.1	1576680	1576844	AY954968.1	4e-07	40531	40560	30
ACCTTGCCAACCTGGTACGATATGTCCGTGA	18.35	56	86	1605160	4e-09	69	39	31	BN843_14710	77ORF049[Staphylococcus aureus M1]	NC_021059.1	1576680	1576844	AY954962.1	2e-05	39667	39638	30
CACACCTTGCCAACCTGGTACGATATGTCCG	18.35	56	86	1605157	4e-09	72	42	31	BN843_14710	77ORF049[Staphylococcus aureus M1]	NC_021059.1	1576680	1576844	AY954968.1	2e-05	40557	40531	27
CACCTTGCCAACCTGGTACGATATGTCCGTG	18.35	56	86	1605159	4e-09	70	40	31	BN843_14710	77ORF049[Staphylococcus aureus M1]	NC_021059.1	1576680	1576844	AY954962.1	7e-05	39667	39639	29
TCACACCTTGCCAACCTGGTACGATATGTCC	18.35	56	86	1605156	4e-09	73	43	31	BN843_14710	77ORF049[Staphylococcus aureus M1]	NC_021059.1	1576680	1576844	AY954968.1	6e-06	40558	40531	28
TTCACACCTTGCCAACCTGGTACGATATGTC	18.35	56	86	1605155	4e-09	74	44	31	BN843_14710	77ORF049[Staphylococcus aureus M1]	NC_021059.1	1576680	1576844	AY954968.1	2e-06	40559	40531	29
AATGTCCCGTTAGAAAGCATAACTAAAGGCG	18.282	54	85	1607048	2e-07	1282	1312	31	SAA6159_01398	bacterophage DNA-directed DNA polymerase[Staphylococcus aureus subsp. aureus JKD6159]	NC_017338.1	1548740	1550692	BX571857.1	6e-06	990637	990667	31
AGAGGGTCGCCTTTAGTTATGCTTTCTAACG	18.282	54	85	1607041	2e-07	1328	1301	28	CA347_1467	DNA polymerase A family protein[Staphylococcus aureus CA-347]	NC_021554.1	1567955	1569916	AY954957.1	6e-06	34485	34458	28
AGGGTCGCCTTTAGTTATGCTTTCTAACGGG	18.282	54	85	1607043	2e-07	1317	1287	31	SAA6159_01398	bacterophage DNA-directed DNA polymerase[Staphylococcus aureus subsp. aureus JKD6159]	NC_017338.1	1548740	1550692	BX571857.1	6e-06	990672	990642	31
ATGTCCCGTTAGAAAGCATAACTAAAGGCGA	18.282	54	85	1607047	2e-07	1283	1313	31	SAA6159_01398	bacterophage DNA-directed DNA polymerase[Staphylococcus aureus subsp. aureus JKD6159]	NC_017338.1	1548740	1550692	BX571857.1	6e-06	990638	990668	31
CCGTTAGAAAGCATAACTAAAGGCGACCCTC	18.282	54	85	1607042	2e-07	1297	1327	31	CA347_1467	DNA polymerase A family protein[Staphylococcus aureus CA-347]	NC_021554.1	1567955	1569916	AY954957.1	6e-06	34454	34484	31
GAGAGGGTCGCCTTTAGTTATGCTTTCTAAC	18.282	54	85	1607040	5e-08	1329	1301	29	CA347_1467	DNA polymerase A family protein[Staphylococcus aureus CA-347]	NC_021554.1	1567955	1569916	AY954957.1	2e-06	34486	34458	29
GTCCCGTTAGAAAGCATAACTAAAGGCGACC	18.282	54	85	1607045	2e-07	1285	1315	31	SAA6159_01398	bacterophage DNA-directed DNA polymerase[Staphylococcus aureus subsp. aureus JKD6159]	NC_017338.1	1548740	1550692	BX571857.1	6e-06	990640	990670	31
TAATGTCCCGTTAGAAAGCATAACTAAAGGC	18.282	54	85	1607049	2e-07	1281	1311	31	SAA6159_01398	bacterophage DNA-directed DNA polymerase[Staphylococcus aureus subsp. aureus JKD6159]	NC_017338.1	1548740	1550692	BX571857.1	6e-06	990636	990666	31
TCCCGTTAGAAAGCATAACTAAAGGCGACCC	18.282	54	85	1607044	2e-07	1286	1316	31	SAA6159_01398	bacterophage DNA-directed DNA polymerase[Staphylococcus aureus subsp. aureus JKD6159]	NC_017338.1	1548740	1550692	BX571857.1	6e-06	990641	990671	31
TGTCCCGTTAGAAAGCATAACTAAAGGCGAC	18.282	54	85	1607046	2e-07	1284	1314	31	SAA6159_01398	bacterophage DNA-directed DNA polymerase[Staphylococcus aureus subsp. aureus JKD6159]	NC_017338.1	1548740	1550692	BX571857.1	6e-06	990639	990669	31
TTAGAAAGCATAACTAAAGGCGACCCTCTCA	18.282	54	85	1607039	1e-08	1301	1330	30	CA347_1467	DNA polymerase A family protein[Staphylococcus aureus CA-347]	NC_021554.1	1567955	1569916	AY954957.1	4e-07	34458	34487	30
AAAAGGTTTAATATAAAAATGTAATAAAATT	18.1596	81	97	1573415	0.017	1546	1528	19	C248_0061	hypothetical protein[Staphylococcus aureus 08BA02176]	NC_018608.1	66785	68989	AY954956.1	1e-07	24035	24065	31
AAATTTTATTACATTTTTATATTAAACCTTT	18.1596	81	97	1573414	0.017	1528	1546	19	C248_0061	hypothetical protein[Staphylococcus aureus 08BA02176]	NC_018608.1	66785	68989	AY954956.1	1e-07	24066	24036	31
AAGGTTTAATATAAAAATGTAATAAAATTTA	18.1596	81	97	1573413	0.017	1546	1528	19	C248_0061	hypothetical protein[Staphylococcus aureus 08BA02176]	NC_018608.1	66785	68989	AY954956.1	1e-07	24037	24067	31
ATAAATTTTATTACATTTTTATATTAAACCT	18.1596	81	97	1573412	0.017	1521	1546	26	C248_0061	hypothetical protein[Staphylococcus aureus 08BA02176]	NC_018608.1	66785	68989	AY954956.1	1e-07	24068	24038	31
CTTTATAAATTTTATTACATTTTTATATTAA	18.1596	81	97	1573408	0.017	1521	1546	26	C248_0061	hypothetical protein[Staphylococcus aureus 08BA02176]	NC_018608.1	66785	68989	AY954956.1	1e-07	24072	24042	31
TAATATAAAAATGTAATAAAATTTATAAAGA	18.1596	81	97	1573407	0.017	1546	1521	26	C248_0061	hypothetical protein[Staphylococcus aureus 08BA02176]	NC_018608.1	66785	68989	AY954956.1	1e-07	24043	24073	31
TATAAATTTTATTACATTTTTATATTAAACC	18.1596	81	97	1573411	0.017	1521	1546	26	C248_0061	hypothetical protein[Staphylococcus aureus 08BA02176]	NC_018608.1	66785	68989	AY954956.1	1e-07	24069	24039	31
TTATAAATTTTATTACATTTTTATATTAAAC	18.1596	81	97	1573410	0.017	1521	1546	26	C248_0061	hypothetical protein[Staphylococcus aureus 08BA02176]	NC_018608.1	66785	68989	AY954956.1	1e-07	24070	24040	31
TTTAATATAAAAATGTAATAAAATTTATAAA	18.1596	81	97	1573409	0.017	1546	1521	26	C248_0061	hypothetical protein[Staphylococcus aureus 08BA02176]	NC_018608.1	66785	68989	AY954956.1	1e-07	24041	24071	31
AAAAAAATAGTCAAATCATCAGTTGTTACAT	17.889	84	98	1572418	4e-09	4	34	31	lukF-PV	Panton-Valentine leukocidin chain F precursor[Staphylococcus aureus subsp. aureus SA957]	NC_022442.1	1533880	1534857	BA000033.2	1e-07	1530355	1530325	31
AAAAAAATCCTATGAGCTAAACAGATAGATA	17.889	84	98	1571463	2e-07	960	987	28	SAAG_02096	panton-Valentine leukocidin chain F protein[Staphylococcus aureus subsp. aureus 55/2053]	NC_022113.1	1460399	1461385	BA000033.2	1e-07	1529400	1529370	31
AAAAAAATTGGTTGGGATGTTGAAGCACATA	17.889	84	98	1571872	4e-09	550	580	31	lukF-PV	Panton-Valentine leukocidin chain F precursor[Staphylococcus aureus subsp. aureus SA957]	NC_022442.1	1533880	1534857	BA000033.2	1e-07	1529809	1529779	31
AAAAAATAGTCAAATCATCAGTTGTTACATC	17.889	84	98	1572417	4e-09	5	35	31	lukF-PV	Panton-Valentine leukocidin chain F precursor[Staphylococcus aureus subsp. aureus SA957]	NC_022442.1	1533880	1534857	BA000033.2	1e-07	1530354	1530324	31
AAAAAATCCTATGAGCTAAACAGATAGATAA	17.889	84	98	1571462	6e-07	961	987	27	SAAG_02096	panton-Valentine leukocidin chain F protein[Staphylococcus aureus subsp. aureus 55/2053]	NC_022113.1	1460399	1461385	BA000033.2	1e-07	1529399	1529369	31
AAAAAATCTTAAATATGTTAAAATTTACAAA	17.889	84	98	1571429	0.79	322	349	29	STP1_1377	YycI protein[Staphylococcus pasteuri SP1]	NC_022737.1	1462018	1462809	BA000033.2	1e-07	1529366	1529336	31
AAAAAATTGGTTGGGATGTTGAAGCACATAA	17.889	84	98	1571871	4e-09	551	581	31	lukF-PV	Panton-Valentine leukocidin chain F precursor[Staphylococcus aureus subsp. aureus SA957]	NC_022442.1	1533880	1534857	BA000033.2	1e-07	1529808	1529778	31
AAAAACAATTAGTTATAATCAACAAAACTAT	17.889	84	98	1572882	4e-09	480	510	31	lukS-PV	Panton-Valentine leukocidin chain S precursor[Staphylococcus aureus subsp. aureus SA957]	NC_022442.1	1534859	1535797	BA000033.2	1e-07	1530819	1530789	31
AAAAACACAGATCATATAAAAGCAATGAGGT	17.889	84	98	1573088	4e-09	274	304	31	lukS-PV	Panton-Valentine leukocidin chain S precursor[Staphylococcus aureus subsp. aureus SA957]	NC_022442.1	1534859	1535797	AY954956.1	1e-07	24362	24392	31
AAAAACATTTCATTACCATAAGTTGAATGAT	17.889	84	98	1571799	4e-09	653	623	31	lukF-PV	Panton-Valentine leukocidin chain F precursor[Staphylococcus aureus subsp. aureus SA957]	NC_022442.1	1533880	1534857	BA000033.2	1e-07	1529706	1529736	31
AAAAAGATTTTGAACCATTACCTCCACCTGA	17.889	84	98	1571965	4e-09	487	457	31	lukF-PV	Panton-Valentine leukocidin chain F precursor[Staphylococcus aureus subsp. aureus SA957]	NC_022442.1	1533880	1534857	BA000033.2	1e-07	1529872	1529902	31
AAAAAGGCTCAGGAGATACAAGTGAATTTGA	17.889	84	98	1572628	4e-09	734	764	31	lukS-PV	Panton-Valentine leukocidin chain S precursor[Staphylococcus aureus subsp. aureus SA957]	NC_022442.1	1534859	1535797	BA000033.2	1e-07	1530565	1530535	31
AAAAAGTATAACAAAGACGCTTTGATTTTAA	17.889	84	98	1573163	4e-09	199	229	31	lukS-PV	Panton-Valentine leukocidin chain S precursor[Staphylococcus aureus subsp. aureus SA957]	NC_022442.1	1534859	1535797	AY954956.1	1e-07	24287	24317	31
AAAAAGTGTTCAATGGGGAATAAAAGCTAAT	17.889	84	98	1572825	4e-09	537	567	31	lukS-PV	Panton-Valentine leukocidin chain S precursor[Staphylococcus aureus subsp. aureus SA957]	NC_022442.1	1534859	1535797	BA000033.2	1e-07	1530762	1530732	31
AAAAATAAAATAGATTCAGTAAATGTTAGTC	17.889	84	98	1572989	4e-09	373	403	31	lukS-PV	Panton-Valentine leukocidin chain S precursor[Staphylococcus aureus subsp. aureus SA957]	NC_022442.1	1534859	1535797	AY954956.1	1e-07	24461	24491	31
AAAAATAGTCAAATCATCAGTTGTTACATCA	17.889	84	98	1572416	4e-09	6	36	31	lukF-PV	Panton-Valentine leukocidin chain F precursor[Staphylococcus aureus subsp. aureus SA957]	NC_022442.1	1533880	1534857	BA000033.2	1e-07	1530353	1530323	31
AAAAATCAAAATGAAGAATTTCAAGTACAAC	17.889	84	98	1572046	4e-09	376	406	31	lukF-PV	Panton-Valentine leukocidin chain F precursor[Staphylococcus aureus subsp. aureus SA957]	NC_022442.1	1533880	1534857	BA000033.2	1e-07	1529983	1529953	31
AAAAATCCTATGAGCTAAACAGATAGATAAT	17.889	84	98	1571461	2e-06	962	987	26	SAAG_02096	panton-Valentine leukocidin chain F protein[Staphylococcus aureus subsp. aureus 55/2053]	NC_022113.1	1460399	1461385	BA000033.2	1e-07	1529398	1529368	31
AAAAATCTTAAATATGTTAAAATTTACAAAC	17.889	84	98	1571428	0.79	322	349	29	STP1_1377	YycI protein[Staphylococcus pasteuri SP1]	NC_022737.1	1462018	1462809	BA000033.2	1e-07	1529365	1529335	31
AAAAATGCAAGGTTTTATCAATTCAAAGACT	17.889	84	98	1573134	4e-09	228	258	31	lukS-PV	Panton-Valentine leukocidin chain S precursor[Staphylococcus aureus subsp. aureus SA957]	NC_022442.1	1534859	1535797	AY954956.1	1e-07	24316	24346	31
AAAAATTGGTTGGGATGTTGAAGCACATAAA	17.889	84	98	1571870	4e-09	552	582	31	lukF-PV	Panton-Valentine leukocidin chain F precursor[Staphylococcus aureus subsp. aureus SA957]	NC_022442.1	1533880	1534857	BA000033.2	1e-07	1529807	1529777	31
AAAAATTTCTCAGATTTTAACTTTTAATTTT	17.889	84	98	1572260	4e-09	162	192	31	lukF-PV	Panton-Valentine leukocidin chain F precursor[Staphylococcus aureus subsp. aureus SA957]	NC_022442.1	1533880	1534857	BA000033.2	1e-07	1530197	1530167	31
AAAACAACTGCAACATCAGATTCCGATAAGT	17.889	84	98	1572292	4e-09	130	160	31	lukF-PV	Panton-Valentine leukocidin chain F precursor[Staphylococcus aureus subsp. aureus SA957]	NC_022442.1	1533880	1534857	BA000033.2	1e-07	1530229	1530199	31
AAAACAATTAGTTATAATCAACAAAACTATA	17.889	84	98	1572881	4e-09	481	511	31	lukS-PV	Panton-Valentine leukocidin chain S precursor[Staphylococcus aureus subsp. aureus SA957]	NC_022442.1	1534859	1535797	BA000033.2	1e-07	1530818	1530788	31
AAAACACAGATCATATAAAAGCAATGAGGTG	17.889	84	98	1573087	4e-09	275	305	31	lukS-PV	Panton-Valentine leukocidin chain S precursor[Staphylococcus aureus subsp. aureus SA957]	NC_022442.1	1534859	1535797	AY954956.1	1e-07	24363	24393	31
AAAACATTTCATTACCATAAGTTGAATGATA	17.889	84	98	1571800	4e-09	652	622	31	lukF-PV	Panton-Valentine leukocidin chain F precursor[Staphylococcus aureus subsp. aureus SA957]	NC_022442.1	1533880	1534857	BA000033.2	1e-07	1529707	1529737	31
AAAACCTTGCATTTTTAAAATCAAAGCGTCT	17.889	84	98	1573149	4e-09	243	213	31	lukS-PV	Panton-Valentine leukocidin chain S precursor[Staphylococcus aureus subsp. aureus SA957]	NC_022442.1	1534859	1535797	AY954956.1	1e-07	24331	24301	31
AAAACTCATGAAATTAAAGTGAAAGGACATA	17.889	84	98	1572458	4e-09	904	934	31	lukS-PV	Panton-Valentine leukocidin chain S precursor[Staphylococcus aureus subsp. aureus SA957]	NC_022442.1	1534859	1535797	BA000033.2	1e-07	1530395	1530365	31
AAAACTTCTTGGAATATCACAAAATGCCAGT	17.889	84	98	1571736	4e-09	686	716	31	lukF-PV	Panton-Valentine leukocidin chain F precursor[Staphylococcus aureus subsp. aureus SA957]	NC_022442.1	1533880	1534857	BA000033.2	1e-07	1529673	1529643	31
AAAAGAACTAATTTCAAAAAAATTGGTTGGG	17.889	84	98	1571887	4e-09	535	565	31	lukF-PV	Panton-Valentine leukocidin chain F precursor[Staphylococcus aureus subsp. aureus SA957]	NC_022442.1	1533880	1534857	BA000033.2	1e-07	1529824	1529794	31
AAAAGACACTATTAGTTCTCAATTTTATTGG	17.889	84	98	1572146	4e-09	276	306	31	lukF-PV	Panton-Valentine leukocidin chain F precursor[Staphylococcus aureus subsp. aureus SA957]	NC_022442.1	1533880	1534857	BA000033.2	1e-07	1530083	1530053	31
AAAAGCAATGAGGTGGCCTTTCCAATACAAT	17.889	84	98	1573071	4e-09	291	321	31	lukS-PV	Panton-Valentine leukocidin chain S precursor[Staphylococcus aureus subsp. aureus SA957]	NC_022442.1	1534859	1535797	AY954956.1	1e-07	24379	24409	31
AAAAGCAATGCAATTGATGTAACAACTGATG	17.889	84	98	1572402	4e-09	50	20	31	lukF-PV	Panton-Valentine leukocidin chain F precursor[Staphylococcus aureus subsp. aureus SA957]	NC_022442.1	1533880	1534857	BA000033.2	1e-07	1530309	1530339	31
AAAAGCTAATTCATTTATCACATCATTAGGT	17.889	84	98	1572804	4e-09	558	588	31	lukS-PV	Panton-Valentine leukocidin chain S precursor[Staphylococcus aureus subsp. aureus SA957]	NC_022442.1	1534859	1535797	BA000033.2	1e-07	1530741	1530711	31
AAAAGGCTCAGGAGATACAAGTGAATTTGAA	17.889	84	98	1572627	4e-09	735	765	31	lukS-PV	Panton-Valentine leukocidin chain S precursor[Staphylococcus aureus subsp. aureus SA957]	NC_022442.1	1534859	1535797	BA000033.2	1e-07	1530564	1530534	31
AAAAGTATAACAAAGACGCTTTGATTTTAAA	17.889	84	98	1573162	4e-09	200	230	31	lukS-PV	Panton-Valentine leukocidin chain S precursor[Staphylococcus aureus subsp. aureus SA957]	NC_022442.1	1534859	1535797	AY954956.1	1e-07	24288	24318	31
AAAAGTGTTCAATGGGGAATAAAAGCTAATT	17.889	84	98	1572824	4e-09	538	568	31	lukS-PV	Panton-Valentine leukocidin chain S precursor[Staphylococcus aureus subsp. aureus SA957]	NC_022442.1	1534859	1535797	BA000033.2	1e-07	1530761	1530731	31
AAAAGTTAAAATCTGAGAAATTTTTAACTTA	17.889	84	98	1572266	4e-09	186	156	31	lukF-PV	Panton-Valentine leukocidin chain F precursor[Staphylococcus aureus subsp. aureus SA957]	NC_022442.1	1533880	1534857	BA000033.2	1e-07	1530173	1530203	31
AAAAGTTATGATAAAGATACATTAATACTCA	17.889	84	98	1572220	4e-09	202	232	31	lukF-PV	Panton-Valentine leukocidin chain F precursor[Staphylococcus aureus subsp. aureus SA957]	NC_022442.1	1533880	1534857	BA000033.2	1e-07	1530157	1530127	31
AAAAGTTTGTATATCTATCCATTTCTCTTTG	17.889	84	98	1571614	4e-09	838	808	31	lukF-PV	Panton-Valentine leukocidin chain F precursor[Staphylococcus aureus subsp. aureus SA957]	NC_022442.1	1533880	1534857	BA000033.2	1e-07	1529521	1529551	31
AAAATAAAATAGATTCAGTAAATGTTAGTCA	17.889	84	98	1572988	4e-09	374	404	31	lukS-PV	Panton-Valentine leukocidin chain S precursor[Staphylococcus aureus subsp. aureus SA957]	NC_022442.1	1534859	1535797	AY954956.1	1e-07	24462	24492	31
AAAATAACCACGTCAATTAAGACGTGGTTAC	17.889	84	98	1571378	5e-08	160	188	29	MS7_0645	pyridine nucleotide-disulfide oxidoreductase family protein[Staphylococcus aureus subsp. aureus 11819-97]	NC_017351.1	686824	687024	BA000033.2	1e-07	1529285	1529315	31
AAAATAGATTCAGTAAATGTTAGTCAAACAT	17.889	84	98	1572983	4e-09	379	409	31	lukS-PV	Panton-Valentine leukocidin chain S precursor[Staphylococcus aureus subsp. aureus SA957]	NC_022442.1	1534859	1535797	AY954956.1	1e-07	24467	24497	31
AAAATAGTCAAATCATCAGTTGTTACATCAA	17.889	84	98	1572415	4e-09	7	37	31	lukF-PV	Panton-Valentine leukocidin chain F precursor[Staphylococcus aureus subsp. aureus SA957]	NC_022442.1	1533880	1534857	BA000033.2	1e-07	1530352	1530322	31
AAAATAGTCTCTCGGATTTTGACTATATGGT	17.889	84	98	1572732	4e-09	660	630	31	lukS-PV	Panton-Valentine leukocidin chain S precursor[Staphylococcus aureus subsp. aureus SA957]	NC_022442.1	1534859	1535797	BA000033.2	1e-07	1530639	1530669	31
AAAATATTCAGTTTGATTTTGTTAAAGATAA	17.889	84	98	1573192	4e-09	170	200	31	lukS-PV	Panton-Valentine leukocidin chain S precursor[Staphylococcus aureus subsp. aureus SA957]	NC_022442.1	1534859	1535797	AY954956.1	1e-07	24258	24288	31
AAAATCAAAATGAAGAATTTCAAGTACAACA	17.889	84	98	1572045	4e-09	377	407	31	lukF-PV	Panton-Valentine leukocidin chain F precursor[Staphylococcus aureus subsp. aureus SA957]	NC_022442.1	1533880	1534857	BA000033.2	1e-07	1529982	1529952	31
AAAATCAAACTGAATATTTTGTGTGACCCCC	17.889	84	98	1573203	4e-09	189	159	31	lukS-PV	Panton-Valentine leukocidin chain S precursor[Staphylococcus aureus subsp. aureus SA957]	NC_022442.1	1534859	1535797	AY954956.1	1e-07	24277	24247	31
AAAATCAAAGCGTCTTTGTTATACTTTTTAT	17.889	84	98	1573165	4e-09	227	197	31	lukS-PV	Panton-Valentine leukocidin chain S precursor[Staphylococcus aureus subsp. aureus SA957]	NC_022442.1	1534859	1535797	AY954956.1	1e-07	24315	24285	31
AAAATCATACAGTTAAATTAATAGATACTCA	17.889	84	98	1571502	4e-09	920	950	31	lukF-PV	Panton-Valentine leukocidin chain F precursor[Staphylococcus aureus subsp. aureus SA957]	NC_022442.1	1533880	1534857	BA000033.2	1e-07	1529439	1529409	31
AAAATCCTATGAGCTAAACAGATAGATAATC	17.889	84	98	1571460	8e-06	963	987	25	SAAG_02096	panton-Valentine leukocidin chain F protein[Staphylococcus aureus subsp. aureus 55/2053]	NC_022113.1	1460399	1461385	BA000033.2	1e-07	1529397	1529367	31
AAAATCTGAGAAATTTTTAACTTATCGGAAT	17.889	84	98	1572273	4e-09	179	149	31	lukF-PV	Panton-Valentine leukocidin chain F precursor[Staphylococcus aureus subsp. aureus SA957]	NC_022442.1	1533880	1534857	BA000033.2	1e-07	1530180	1530210	31
AAAATCTTAAATATGTTAAAATTTACAAACA	17.889	84	98	1571427	0.79	2029	2051	23	SPSINT_0503	primase, superantigen-encoding pathogenicity islands SaPI[Staphylococcus pseudintermedius HKU10-03]	NC_014925.1	548920	551289	BA000033.2	1e-07	1529364	1529334	31
AAAATCTTTTTCAGAGACAATTAACTATAAA	17.889	84	98	1571945	4e-09	477	507	31	lukF-PV	Panton-Valentine leukocidin chain F precursor[Staphylococcus aureus subsp. aureus SA957]	NC_022442.1	1533880	1534857	BA000033.2	1e-07	1529882	1529852	31
AAAATGAAGAATTTCAAGTACAACAAACGGT	17.889	84	98	1572039	4e-09	383	413	31	lukF-PV	Panton-Valentine leukocidin chain F precursor[Staphylococcus aureus subsp. aureus SA957]	NC_022442.1	1533880	1534857	BA000033.2	1e-07	1529976	1529946	31
AAAATGCAAGGTTTTATCAATTCAAAGACTA	17.889	84	98	1573133	4e-09	229	259	31	lukS-PV	Panton-Valentine leukocidin chain S precursor[Staphylococcus aureus subsp. aureus SA957]	NC_022442.1	1534859	1535797	AY954956.1	1e-07	24317	24347	31
AAAATGCCAGTGTTATCCAGAGGTAACTTCA	17.889	84	98	1571716	4e-09	706	736	31	lukF-PV	Panton-Valentine leukocidin chain F precursor[Staphylococcus aureus subsp. aureus SA957]	NC_022442.1	1533880	1534857	BA000033.2	1e-07	1529653	1529623	31
AAAATGTCTGGACATGATCCAAATTTATTTG	17.889	84	98	1572773	4e-09	589	619	31	lukS-PV	Panton-Valentine leukocidin chain S precursor[Staphylococcus aureus subsp. aureus SA957]	NC_022442.1	1534859	1535797	BA000033.2	1e-07	1530710	1530680	31
AAAATTACCACCTATGTTATAACCTAATGTT	17.889	84	98	1572957	4e-09	435	405	31	lukS-PV	Panton-Valentine leukocidin chain S precursor[Staphylococcus aureus subsp. aureus SA957]	NC_022442.1	1534859	1535797	AY954956.1	1e-07	24523	24493	31
AAAATTACTGTTACTTATCAAAGAGAAATGG	17.889	84	98	1571632	4e-09	790	820	31	lukF-PV	Panton-Valentine leukocidin chain F precursor[Staphylococcus aureus subsp. aureus SA957]	NC_022442.1	1533880	1534857	BA000033.2	1e-07	1529569	1529539	31
AAAATTCAAAAAGTGTTCAATGGGGAATAAA	17.889	84	98	1572832	4e-09	530	560	31	lukS-PV	Panton-Valentine leukocidin chain S precursor[Staphylococcus aureus subsp. aureus SA957]	NC_022442.1	1534859	1535797	BA000033.2	1e-07	1530769	1530739	31
AAAATTGAGAACTAATAGTGTCTTTTGGATT	17.889	84	98	1572151	4e-09	301	271	31	lukF-PV	Panton-Valentine leukocidin chain F precursor[Staphylococcus aureus subsp. aureus SA957]	NC_022442.1	1533880	1534857	BA000033.2	1e-07	1530058	1530088	31
AAAATTTACAAACACTTTCTTTCTATATTAG	17.889	84	98	1571410	0.017	69	47	23	SAZ172_0994	GNAT family acetyltransferase YjcF[Staphylococcus aureus subsp. aureus Z172]	NC_022604.1	1077258	1077692	BA000033.2	1e-07	1529347	1529317	31
AAAATTTCTCAGATTTTAACTTTTAATTTTA	17.889	84	98	1572259	4e-09	163	193	31	lukF-PV	Panton-Valentine leukocidin chain F precursor[Staphylococcus aureus subsp. aureus SA957]	NC_022442.1	1533880	1534857	BA000033.2	1e-07	1530196	1530166	31
AAACAACTGCAACATCAGATTCCGATAAGTT	17.889	84	98	1572291	4e-09	131	161	31	lukF-PV	Panton-Valentine leukocidin chain F precursor[Staphylococcus aureus subsp. aureus SA957]	NC_022442.1	1533880	1534857	BA000033.2	1e-07	1530228	1530198	31
AAACAAGAAAGCTATAGAACTAGCTTAGATA	17.889	84	98	1571917	4e-09	505	535	31	lukF-PV	Panton-Valentine leukocidin chain F precursor[Staphylococcus aureus subsp. aureus SA957]	NC_022442.1	1533880	1534857	BA000033.2	1e-07	1529854	1529824	31
AAACAATTAGTTATAATCAACAAAACTATAT	17.889	84	98	1572880	4e-09	482	512	31	lukS-PV	Panton-Valentine leukocidin chain S precursor[Staphylococcus aureus subsp. aureus SA957]	NC_022442.1	1534859	1535797	BA000033.2	1e-07	1530817	1530787	31
AAACACAGATCATATAAAAGCAATGAGGTGG	17.889	84	98	1573086	4e-09	276	306	31	lukS-PV	Panton-Valentine leukocidin chain S precursor[Staphylococcus aureus subsp. aureus SA957]	NC_022442.1	1534859	1535797	AY954956.1	1e-07	24364	24394	31
AAACACTTTCTTTCTATATTAGGGTAACCAC	17.889	84	98	1571401	0.79	66	47	20	SAZ172_0994	GNAT family acetyltransferase YjcF[Staphylococcus aureus subsp. aureus Z172]	NC_022604.1	1077258	1077692	BA000033.2	1e-07	1529338	1529308	31
AAACAGAAATTACACAGTTAAATATGAAGTG	17.889	84	98	1572495	4e-09	867	897	31	lukS-PV	Panton-Valentine leukocidin chain S precursor[Staphylococcus aureus subsp. aureus SA957]	NC_022442.1	1534859	1535797	BA000033.2	1e-07	1530432	1530402	31
AAACAGATAGATAATCAAAAAATCTTAAATA	17.889	84	98	1571445	0.79	126	108	20	qoxA	quinol oxidase subunit II[Staphylococcus pseudintermedius ED99]	NC_017568.1	1773635	1774735	BA000033.2	1e-07	1529382	1529352	31
AAACAGTTGCAATAAATGAAGGATTGAAACC	17.889	84	98	1572665	4e-09	727	697	31	lukS-PV	Panton-Valentine leukocidin chain S precursor[Staphylococcus aureus subsp. aureus SA957]	NC_022442.1	1534859	1535797	BA000033.2	1e-07	1530572	1530602	31
AAACATTAGGTTATAACATAGGTGGTAATTT	17.889	84	98	1572958	4e-09	404	434	31	lukS-PV	Panton-Valentine leukocidin chain S precursor[Staphylococcus aureus subsp. aureus SA957]	NC_022442.1	1534859	1535797	AY954956.1	1e-07	24492	24522	31
AAACATTTATTCTGGCTATACAAAGCCAAAT	17.889	84	98	1572179	4e-09	243	273	31	lukF-PV	Panton-Valentine leukocidin chain F precursor[Staphylococcus aureus subsp. aureus SA957]	NC_022442.1	1533880	1534857	BA000033.2	1e-07	1530116	1530086	31
AAACATTTCATTACCATAAGTTGAATGATAA	17.889	84	98	1571801	4e-09	651	621	31	lukF-PV	Panton-Valentine leukocidin chain F precursor[Staphylococcus aureus subsp. aureus SA957]	NC_022442.1	1533880	1534857	BA000033.2	1e-07	1529708	1529738	31
AAACCACTGTGTACTAATGGGGGTAATTCAT	17.889	84	98	1572691	4e-09	701	671	31	lukS-PV	Panton-Valentine leukocidin chain S precursor[Staphylococcus aureus subsp. aureus SA957]	NC_022442.1	1534859	1535797	BA000033.2	1e-07	1530598	1530628	31
AAACCATATAGTCAAAATCCGAGAGACTATT	17.889	84	98	1572734	4e-09	628	658	31	lukS-PV	Panton-Valentine leukocidin chain S precursor[Staphylococcus aureus subsp. aureus SA957]	NC_022442.1	1534859	1535797	BA000033.2	1e-07	1530671	1530641	31
AAACCTTGCATTTTTAAAATCAAAGCGTCTT	17.889	84	98	1573150	4e-09	242	212	31	lukS-PV	Panton-Valentine leukocidin chain S precursor[Staphylococcus aureus subsp. aureus SA957]	NC_022442.1	1534859	1535797	AY954956.1	1e-07	24330	24300	31
AAACGAAGTAGCAATAGGAGTGATTATTCCT	17.889	84	98	1573323	4e-09	69	39	31	lukS-PV	Panton-Valentine leukocidin chain S precursor[Staphylococcus aureus subsp. aureus SA957]	NC_022442.1	1534859	1535797	AY954956.1	1e-07	24157	24127	31
AAACGGTAGGTTATTCTTATGGTGGAGATAT	17.889	84	98	1572015	4e-09	407	437	31	lukF-PV	Panton-Valentine leukocidin chain F precursor[Staphylococcus aureus subsp. aureus SA957]	NC_022442.1	1533880	1534857	BA000033.2	1e-07	1529952	1529922	31
AAACGTTGTAGATTATGCACCTAAAAATCAA	17.889	84	98	1572068	4e-09	354	384	31	lukF-PV	Panton-Valentine leukocidin chain F precursor[Staphylococcus aureus subsp. aureus SA957]	NC_022442.1	1533880	1534857	BA000033.2	1e-07	1530005	1529975	31
AAACTCATGAAATTAAAGTGAAAGGACATAA	17.889	84	98	1572457	4e-09	905	935	31	lukS-PV	Panton-Valentine leukocidin chain S precursor[Staphylococcus aureus subsp. aureus SA957]	NC_022442.1	1534859	1535797	BA000033.2	1e-07	1530394	1530364	31
AAACTGAATATTTTGTGTGACCCCCCACTTA	17.889	84	98	1573209	4e-09	183	153	31	lukS-PV	Panton-Valentine leukocidin chain S precursor[Staphylococcus aureus subsp. aureus SA957]	NC_022442.1	1534859	1535797	AY954956.1	1e-07	24271	24241	31
AAACTTCTTGGAATATCACAAAATGCCAGTG	17.889	84	98	1571735	4e-09	687	717	31	lukF-PV	Panton-Valentine leukocidin chain F precursor[Staphylococcus aureus subsp. aureus SA957]	NC_022442.1	1533880	1534857	BA000033.2	1e-07	1529672	1529642	31
AAACTTTTGGAATCAACTTCACTGGATAGGT	17.889	84	98	1571591	4e-09	831	861	31	lukF-PV	Panton-Valentine leukocidin chain F precursor[Staphylococcus aureus subsp. aureus SA957]	NC_022442.1	1533880	1534857	BA000033.2	1e-07	1529528	1529498	31
AAAGAACTAATTTCAAAAAAATTGGTTGGGA	17.889	84	98	1571886	4e-09	536	566	31	lukF-PV	Panton-Valentine leukocidin chain F precursor[Staphylococcus aureus subsp. aureus SA957]	NC_022442.1	1533880	1534857	BA000033.2	1e-07	1529823	1529793	31
AAAGACACTATTAGTTCTCAATTTTATTGGG	17.889	84	98	1572145	4e-09	277	307	31	lukF-PV	Panton-Valentine leukocidin chain F precursor[Staphylococcus aureus subsp. aureus SA957]	NC_022442.1	1533880	1534857	BA000033.2	1e-07	1530082	1530052	31
AAAGACGCTTTGATTTTAAAAATGCAAGGTT	17.889	84	98	1573151	4e-09	211	241	31	lukS-PV	Panton-Valentine leukocidin chain S precursor[Staphylococcus aureus subsp. aureus SA957]	NC_022442.1	1534859	1535797	AY954956.1	1e-07	24299	24329	31
AAAGACTACTTATTACAATTACAAAAACACA	17.889	84	98	1573110	4e-09	252	282	31	lukS-PV	Panton-Valentine leukocidin chain S precursor[Staphylococcus aureus subsp. aureus SA957]	NC_022442.1	1534859	1535797	AY954956.1	1e-07	24340	24370	31
AAAGAGAAATGGATAGATATACAAACTTTTG	17.889	84	98	1571613	4e-09	809	839	31	lukF-PV	Panton-Valentine leukocidin chain F precursor[Staphylococcus aureus subsp. aureus SA957]	NC_022442.1	1533880	1534857	BA000033.2	1e-07	1529550	1529520	31
AAAGATAAAAAGTATAACAAAGACGCTTTGA	17.889	84	98	1573169	4e-09	193	223	31	lukS-PV	Panton-Valentine leukocidin chain S precursor[Staphylococcus aureus subsp. aureus SA957]	NC_022442.1	1534859	1535797	AY954956.1	1e-07	24281	24311	31
AAAGATAAAAGTTATGATAAAGATACATTAA	17.889	84	98	1572226	4e-09	196	226	31	lukF-PV	Panton-Valentine leukocidin chain F precursor[Staphylococcus aureus subsp. aureus SA957]	NC_022442.1	1533880	1534857	BA000033.2	1e-07	1530163	1530133	31
AAAGATACATTAATACTCAAAGCTGCTGGAA	17.889	84	98	1572208	4e-09	214	244	31	lukF-PV	Panton-Valentine leukocidin chain F precursor[Staphylococcus aureus subsp. aureus SA957]	NC_022442.1	1533880	1534857	BA000033.2	1e-07	1530145	1530115	31
AAAGCAACTTAAATGCTGGACAAAACTTCTT	17.889	84	98	1571757	4e-09	665	695	31	lukF-PV	Panton-Valentine leukocidin chain F precursor[Staphylococcus aureus subsp. aureus SA957]	NC_022442.1	1533880	1534857	BA000033.2	1e-07	1529694	1529664	31
AAAGCAATGAGGTGGCCTTTCCAATACAATA	17.889	84	98	1573070	4e-09	292	322	31	lukS-PV	Panton-Valentine leukocidin chain S precursor[Staphylococcus aureus subsp. aureus SA957]	NC_022442.1	1534859	1535797	AY954956.1	1e-07	24380	24410	31
AAAGCAATGCAATTGATGTAACAACTGATGA	17.889	84	98	1572403	4e-09	49	19	31	lukF-PV	Panton-Valentine leukocidin chain F precursor[Staphylococcus aureus subsp. aureus SA957]	NC_022442.1	1533880	1534857	BA000033.2	1e-07	1530310	1530340	31
AAAGCCAAATCCAAAAGACACTATTAGTTCT	17.889	84	98	1572158	4e-09	264	294	31	lukF-PV	Panton-Valentine leukocidin chain F precursor[Staphylococcus aureus subsp. aureus SA957]	NC_022442.1	1533880	1534857	BA000033.2	1e-07	1530095	1530065	31
AAAGCGTCTTTGTTATACTTTTTATCTTTAA	17.889	84	98	1573171	4e-09	221	191	31	lukS-PV	Panton-Valentine leukocidin chain S precursor[Staphylococcus aureus subsp. aureus SA957]	NC_022442.1	1534859	1535797	AY954956.1	1e-07	24309	24279	31
AAAGCTAATTCATTTATCACATCATTAGGTA	17.889	84	98	1572803	4e-09	559	589	31	lukS-PV	Panton-Valentine leukocidin chain S precursor[Staphylococcus aureus subsp. aureus SA957]	NC_022442.1	1534859	1535797	BA000033.2	1e-07	1530740	1530710	31
AAAGCTATAGAACTAGCTTAGATAAAAGAAC	17.889	84	98	1571910	4e-09	512	542	31	lukF-PV	Panton-Valentine leukocidin chain F precursor[Staphylococcus aureus subsp. aureus SA957]	NC_022442.1	1533880	1534857	BA000033.2	1e-07	1529847	1529817	31
AAAGCTGATAACAATATTGAGAATATTGGTG	17.889	84	98	1573283	4e-09	79	109	31	lukS-PV	Panton-Valentine leukocidin chain S precursor[Staphylococcus aureus subsp. aureus SA957]	NC_022442.1	1534859	1535797	AY954956.1	1e-07	24167	24197	31
AAAGCTGCTGGAAACATTTATTCTGGCTATA	17.889	84	98	1572190	4e-09	232	262	31	lukF-PV	Panton-Valentine leukocidin chain F precursor[Staphylococcus aureus subsp. aureus SA957]	NC_022442.1	1533880	1534857	BA000033.2	1e-07	1530127	1530097	31
AAAGGACATAATTGATATGAAAAAAATAGTC	17.889	84	98	1572437	0.22	357	337	21	STP1_0412	putative exonuclease[Staphylococcus pasteuri SP1]	NC_022737.1	472128	472682	BA000033.2	1e-07	1530374	1530344	31
AAAGGCCACCTCATTGCTTTTATATGATCTG	17.889	84	98	1573081	4e-09	311	281	31	lukS-PV	Panton-Valentine leukocidin chain S precursor[Staphylococcus aureus subsp. aureus SA957]	NC_022442.1	1534859	1535797	AY954956.1	1e-07	24399	24369	31
AAAGGCTCAGGAGATACAAGTGAATTTGAAA	17.889	84	98	1572626	4e-09	736	766	31	lukS-PV	Panton-Valentine leukocidin chain S precursor[Staphylococcus aureus subsp. aureus SA957]	NC_022442.1	1534859	1535797	BA000033.2	1e-07	1530563	1530533	31
AAAGTAATTTTATCATCAACCTTTTTCTCAC	17.889	84	98	1572327	4e-09	125	95	31	lukF-PV	Panton-Valentine leukocidin chain F precursor[Staphylococcus aureus subsp. aureus SA957]	NC_022442.1	1533880	1534857	BA000033.2	1e-07	1530234	1530264	31
AAAGTATAACAAAGACGCTTTGATTTTAAAA	17.889	84	98	1573161	4e-09	201	231	31	lukS-PV	Panton-Valentine leukocidin chain S precursor[Staphylococcus aureus subsp. aureus SA957]	NC_022442.1	1534859	1535797	AY954956.1	1e-07	24289	24319	31
AAAGTGAAAGGACATAATTGATATGAAAAAA	17.889	84	98	1572443	0.001	919	939	21	lukS-PV	Panton-Valentine leukocidin chain S precursor[Staphylococcus aureus subsp. aureus SA957]	NC_022442.1	1534859	1535797	BA000033.2	1e-07	1530380	1530350	31
AAAGTGTTCAATGGGGAATAAAAGCTAATTC	17.889	84	98	1572823	4e-09	539	569	31	lukS-PV	Panton-Valentine leukocidin chain S precursor[Staphylococcus aureus subsp. aureus SA957]	NC_022442.1	1534859	1535797	BA000033.2	1e-07	1530760	1530730	31
AAAGTGTTTGTAAATTTTAACATATTTAAGA	17.889	84	98	1571423	0.79	2051	2029	23	SPSINT_0503	primase, superantigen-encoding pathogenicity islands SaPI[Staphylococcus pseudintermedius HKU10-03]	NC_014925.1	548920	551289	BA000033.2	1e-07	1529330	1529360	31
AAAGTTAAAATCTGAGAAATTTTTAACTTAT	17.889	84	98	1572267	4e-09	185	155	31	lukF-PV	Panton-Valentine leukocidin chain F precursor[Staphylococcus aureus subsp. aureus SA957]	NC_022442.1	1533880	1534857	BA000033.2	1e-07	1530174	1530204	31
AAAGTTATGATAAAGATACATTAATACTCAA	17.889	84	98	1572219	4e-09	203	233	31	lukF-PV	Panton-Valentine leukocidin chain F precursor[Staphylococcus aureus subsp. aureus SA957]	NC_022442.1	1533880	1534857	BA000033.2	1e-07	1530156	1530126	31
AAAGTTTGTATATCTATCCATTTCTCTTTGA	17.889	84	98	1571615	4e-09	837	807	31	lukF-PV	Panton-Valentine leukocidin chain F precursor[Staphylococcus aureus subsp. aureus SA957]	NC_022442.1	1533880	1534857	BA000033.2	1e-07	1529522	1529552	31
AAATAAAATAGATTCAGTAAATGTTAGTCAA	17.889	84	98	1572987	4e-09	375	405	31	lukS-PV	Panton-Valentine leukocidin chain S precursor[Staphylococcus aureus subsp. aureus SA957]	NC_022442.1	1534859	1535797	AY954956.1	1e-07	24463	24493	31
AAATAAATTTGGATCATGTCCAGACATTTTA	17.889	84	98	1572774	4e-09	618	588	31	lukS-PV	Panton-Valentine leukocidin chain S precursor[Staphylococcus aureus subsp. aureus SA957]	NC_022442.1	1534859	1535797	BA000033.2	1e-07	1530681	1530711	31
AAATAACCACGTCAATTAAGACGTGGTTACC	17.889	84	98	1571379	2e-07	161	188	28	MS7_0645	pyridine nucleotide-disulfide oxidoreductase family protein[Staphylococcus aureus subsp. aureus 11819-97]	NC_017351.1	686824	687024	BA000033.2	1e-07	1529286	1529316	31
AAATAACGTATGGCAGAAATATGGATGTTAC	17.889	84	98	1572598	4e-09	764	794	31	lukS-PV	Panton-Valentine leukocidin chain S precursor[Staphylococcus aureus subsp. aureus SA957]	NC_022442.1	1534859	1535797	BA000033.2	1e-07	1530535	1530505	31
AAATAACTATTGCCATAGTGTGTTGTTCTTC	17.889	84	98	1572556	4e-09	836	806	31	lukS-PV	Panton-Valentine leukocidin chain S precursor[Staphylococcus aureus subsp. aureus SA957]	NC_022442.1	1534859	1535797	BA000033.2	1e-07	1530463	1530493	31
AAATAGATTCAGTAAATGTTAGTCAAACATT	17.889	84	98	1572982	4e-09	380	410	31	lukS-PV	Panton-Valentine leukocidin chain S precursor[Staphylococcus aureus subsp. aureus SA957]	NC_022442.1	1534859	1535797	AY954956.1	1e-07	24468	24498	31
AAATAGTCAAATCATCAGTTGTTACATCAAT	17.889	84	98	1572414	4e-09	8	38	31	lukF-PV	Panton-Valentine leukocidin chain F precursor[Staphylococcus aureus subsp. aureus SA957]	NC_022442.1	1533880	1534857	BA000033.2	1e-07	1530351	1530321	31
AAATAGTCTCTCGGATTTTGACTATATGGTT	17.889	84	98	1572733	4e-09	659	629	31	lukS-PV	Panton-Valentine leukocidin chain S precursor[Staphylococcus aureus subsp. aureus SA957]	NC_022442.1	1534859	1535797	BA000033.2	1e-07	1530640	1530670	31
AAATATGAAGTGAACTGGAAAACTCATGAAA	17.889	84	98	1572476	4e-09	886	916	31	lukS-PV	Panton-Valentine leukocidin chain S precursor[Staphylococcus aureus subsp. aureus SA957]	NC_022442.1	1534859	1535797	BA000033.2	1e-07	1530413	1530383	31
AAATATGGATGTTACTCATGCTACTAGAAGA	17.889	84	98	1572582	4e-09	780	810	31	lukS-PV	Panton-Valentine leukocidin chain S precursor[Staphylococcus aureus subsp. aureus SA957]	NC_022442.1	1534859	1535797	BA000033.2	1e-07	1530519	1530489	31
AAATATGTTAAAATTTACAAACACTTTCTTT	17.889	84	98	1571419	0.79	69	54	16	SAZ172_0994	GNAT family acetyltransferase YjcF[Staphylococcus aureus subsp. aureus Z172]	NC_022604.1	1077258	1077692	BA000033.2	1e-07	1529356	1529326	31
AAATATTCAGTTTGATTTTGTTAAAGATAAA	17.889	84	98	1573191	4e-09	171	201	31	lukS-PV	Panton-Valentine leukocidin chain S precursor[Staphylococcus aureus subsp. aureus SA957]	NC_022442.1	1534859	1535797	AY954956.1	1e-07	24259	24289	31
AAATCAAAATGAAGAATTTCAAGTACAACAA	17.889	84	98	1572044	4e-09	378	408	31	lukF-PV	Panton-Valentine leukocidin chain F precursor[Staphylococcus aureus subsp. aureus SA957]	NC_022442.1	1533880	1534857	BA000033.2	1e-07	1529981	1529951	31
AAATCAAACTGAATATTTTGTGTGACCCCCC	17.889	84	98	1573204	4e-09	188	158	31	lukS-PV	Panton-Valentine leukocidin chain S precursor[Staphylococcus aureus subsp. aureus SA957]	NC_022442.1	1534859	1535797	AY954956.1	1e-07	24276	24246	31
AAATCAAAGCGTCTTTGTTATACTTTTTATC	17.889	84	98	1573166	4e-09	226	196	31	lukS-PV	Panton-Valentine leukocidin chain S precursor[Staphylococcus aureus subsp. aureus SA957]	NC_022442.1	1534859	1535797	AY954956.1	1e-07	24314	24284	31
AAATCATACAGTTAAATTAATAGATACTCAA	17.889	84	98	1571501	4e-09	921	951	31	lukF-PV	Panton-Valentine leukocidin chain F precursor[Staphylococcus aureus subsp. aureus SA957]	NC_022442.1	1533880	1534857	BA000033.2	1e-07	1529438	1529408	31
AAATCATCAGTTGTTACATCAATTGCATTGC	17.889	84	98	1572406	4e-09	16	46	31	lukF-PV	Panton-Valentine leukocidin chain F precursor[Staphylococcus aureus subsp. aureus SA957]	NC_022442.1	1533880	1534857	BA000033.2	1e-07	1530343	1530313	31
AAATCCAAAAGACACTATTAGTTCTCAATTT	17.889	84	98	1572152	4e-09	270	300	31	lukF-PV	Panton-Valentine leukocidin chain F precursor[Staphylococcus aureus subsp. aureus SA957]	NC_022442.1	1533880	1534857	BA000033.2	1e-07	1530089	1530059	31
AAATCCTATGAGCTAAACAGATAGATAATCA	17.889	84	98	1571459	3e-05	964	987	24	SAAG_02096	panton-Valentine leukocidin chain F protein[Staphylococcus aureus subsp. aureus 55/2053]	NC_022113.1	1460399	1461385	BA000033.2	1e-07	1529396	1529366	31
AAATCTGAGAAATTTTTAACTTATCGGAATC	17.889	84	98	1572274	4e-09	178	148	31	lukF-PV	Panton-Valentine leukocidin chain F precursor[Staphylococcus aureus subsp. aureus SA957]	NC_022442.1	1533880	1534857	BA000033.2	1e-07	1530181	1530211	31
AAATCTTAAATATGTTAAAATTTACAAACAC	17.889	84	98	1571426	0.79	2029	2051	23	SPSINT_0503	primase, superantigen-encoding pathogenicity islands SaPI[Staphylococcus pseudintermedius HKU10-03]	NC_014925.1	548920	551289	BA000033.2	1e-07	1529363	1529333	31
AAATCTTTTTCAGAGACAATTAACTATAAAC	17.889	84	98	1571944	4e-09	478	508	31	lukF-PV	Panton-Valentine leukocidin chain F precursor[Staphylococcus aureus subsp. aureus SA957]	NC_022442.1	1533880	1534857	BA000033.2	1e-07	1529881	1529851	31
AAATGAACCATTACCTCCTGTTGATGGACCA	17.889	84	98	1572921	4e-09	471	441	31	lukS-PV	Panton-Valentine leukocidin chain S precursor[Staphylococcus aureus subsp. aureus SA957]	NC_022442.1	1534859	1535797	AY954956.1	1e-07	24559	24529	31
AAATGAAGAATTTCAAGTACAACAAACGGTA	17.889	84	98	1572038	4e-09	384	414	31	lukF-PV	Panton-Valentine leukocidin chain F precursor[Staphylococcus aureus subsp. aureus SA957]	NC_022442.1	1533880	1534857	BA000033.2	1e-07	1529975	1529945	31
AAATGAAGGATTGAAACCACTGTGTACTAAT	17.889	84	98	1572678	4e-09	714	684	31	lukS-PV	Panton-Valentine leukocidin chain S precursor[Staphylococcus aureus subsp. aureus SA957]	NC_022442.1	1534859	1535797	BA000033.2	1e-07	1530585	1530615	31
AAATGAATTAGCTTTTATTCCCCATTGAACA	17.889	84	98	1572819	4e-09	573	543	31	lukS-PV	Panton-Valentine leukocidin chain S precursor[Staphylococcus aureus subsp. aureus SA957]	NC_022442.1	1534859	1535797	BA000033.2	1e-07	1530726	1530756	31
AAATGACCCCAATGTAGATTTAATAAATTAT	17.889	84	98	1573026	4e-09	336	366	31	lukS-PV	Panton-Valentine leukocidin chain S precursor[Staphylococcus aureus subsp. aureus SA957]	NC_022442.1	1534859	1535797	AY954956.1	1e-07	24424	24454	31
AAATGCAAGGTTTTATCAATTCAAAGACTAC	17.889	84	98	1573132	4e-09	230	260	31	lukS-PV	Panton-Valentine leukocidin chain S precursor[Staphylococcus aureus subsp. aureus SA957]	NC_022442.1	1534859	1535797	AY954956.1	1e-07	24318	24348	31
AAATGCCAGTGTTATCCAGAGGTAACTTCAA	17.889	84	98	1571715	4e-09	707	737	31	lukF-PV	Panton-Valentine leukocidin chain F precursor[Staphylococcus aureus subsp. aureus SA957]	NC_022442.1	1533880	1534857	BA000033.2	1e-07	1529652	1529622	31
AAATGCGTTGTGTATTCTAGATCCTTCTAAA	17.889	84	98	1572528	4e-09	864	834	31	lukS-PV	Panton-Valentine leukocidin chain S precursor[Staphylococcus aureus subsp. aureus SA957]	NC_022442.1	1534859	1535797	BA000033.2	1e-07	1530435	1530465	31
AAATGCTGGACAAAACTTCTTGGAATATCAC	17.889	84	98	1571747	4e-09	675	705	31	lukF-PV	Panton-Valentine leukocidin chain F precursor[Staphylococcus aureus subsp. aureus SA957]	NC_022442.1	1533880	1534857	BA000033.2	1e-07	1529684	1529654	31
AAATGGATAGATATACAAACTTTTGGAATCA	17.889	84	98	1571607	4e-09	815	845	31	lukF-PV	Panton-Valentine leukocidin chain F precursor[Staphylococcus aureus subsp. aureus SA957]	NC_022442.1	1533880	1534857	BA000033.2	1e-07	1529544	1529514	31
AAATGTCTGGACATGATCCAAATTTATTTGT	17.889	84	98	1572772	4e-09	590	620	31	lukS-PV	Panton-Valentine leukocidin chain S precursor[Staphylococcus aureus subsp. aureus SA957]	NC_022442.1	1534859	1535797	BA000033.2	1e-07	1530709	1530679	31
AAATGTTAGTCAAACATTAGGTTATAACATA	17.889	84	98	1572969	4e-09	393	423	31	lukS-PV	Panton-Valentine leukocidin chain S precursor[Staphylococcus aureus subsp. aureus SA957]	NC_022442.1	1534859	1535797	AY954956.1	1e-07	24481	24511	31
AAATGTTGTACTTAGAACCCCAATAAAATTG	17.889	84	98	1572127	4e-09	325	295	31	lukF-PV	Panton-Valentine leukocidin chain F precursor[Staphylococcus aureus subsp. aureus SA957]	NC_022442.1	1533880	1534857	BA000033.2	1e-07	1530034	1530064	31
AAATGTTTCCAGCAGCTTTGAGTATTAATGT	17.889	84	98	1572202	4e-09	250	220	31	lukF-PV	Panton-Valentine leukocidin chain F precursor[Staphylococcus aureus subsp. aureus SA957]	NC_022442.1	1533880	1534857	BA000033.2	1e-07	1530109	1530139	31
AAATGTTTTTAGGCTCAAGACAAAGCAACTT	17.889	84	98	1571778	4e-09	644	674	31	lukF-PV	Panton-Valentine leukocidin chain F precursor[Staphylococcus aureus subsp. aureus SA957]	NC_022442.1	1533880	1534857	BA000033.2	1e-07	1529715	1529685	31
AAATTAAAAGTTAAAATCTGAGAAATTTTTA	17.889	84	98	1572261	4e-09	191	161	31	lukF-PV	Panton-Valentine leukocidin chain F precursor[Staphylococcus aureus subsp. aureus SA957]	NC_022442.1	1533880	1534857	BA000033.2	1e-07	1530168	1530198	31
AAATTAAAGTGAAAGGACATAATTGATATGA	17.889	84	98	1572448	2e-06	914	939	26	lukS-PV	Panton-Valentine leukocidin chain S precursor[Staphylococcus aureus subsp. aureus SA957]	NC_022442.1	1534859	1535797	BA000033.2	1e-07	1530385	1530355	31
AAATTAATAGATACTCAATCTAAGGAAAAAA	17.889	84	98	1571488	4e-09	934	964	31	lukF-PV	Panton-Valentine leukocidin chain F precursor[Staphylococcus aureus subsp. aureus SA957]	NC_022442.1	1533880	1534857	BA000033.2	1e-07	1529425	1529395	31
AAATTACACAGTTAAATATGAAGTGAACTGG	17.889	84	98	1572489	4e-09	873	903	31	lukS-PV	Panton-Valentine leukocidin chain S precursor[Staphylococcus aureus subsp. aureus SA957]	NC_022442.1	1534859	1535797	BA000033.2	1e-07	1530426	1530396	31
AAATTACTGTTACTTATCAAAGAGAAATGGA	17.889	84	98	1571631	4e-09	791	821	31	lukF-PV	Panton-Valentine leukocidin chain F precursor[Staphylococcus aureus subsp. aureus SA957]	NC_022442.1	1533880	1534857	BA000033.2	1e-07	1529568	1529538	31
AAATTAGTTCTTTTATCTAAGCTAGTTCTAT	17.889	84	98	1571904	4e-09	548	518	31	lukF-PV	Panton-Valentine leukocidin chain F precursor[Staphylococcus aureus subsp. aureus SA957]	NC_022442.1	1533880	1534857	BA000033.2	1e-07	1529811	1529841	31
AAATTCAAAAAGTGTTCAATGGGGAATAAAA	17.889	84	98	1572831	4e-09	531	561	31	lukS-PV	Panton-Valentine leukocidin chain S precursor[Staphylococcus aureus subsp. aureus SA957]	NC_022442.1	1534859	1535797	BA000033.2	1e-07	1530768	1530738	31
AAATTCACTTGTATCTCCTGAGCCTTTTTCA	17.889	84	98	1572630	4e-09	762	732	31	lukS-PV	Panton-Valentine leukocidin chain S precursor[Staphylococcus aureus subsp. aureus SA957]	NC_022442.1	1534859	1535797	BA000033.2	1e-07	1530537	1530567	31
AAATTCTGGATTGAAGTTACCTCTGGATAAC	17.889	84	98	1571705	4e-09	747	717	31	lukF-PV	Panton-Valentine leukocidin chain F precursor[Staphylococcus aureus subsp. aureus SA957]	NC_022442.1	1533880	1534857	BA000033.2	1e-07	1529612	1529642	31
AAATTCTTCATTTTGATTTTTAGGTGCATAA	17.889	84	98	1572056	4e-09	396	366	31	lukF-PV	Panton-Valentine leukocidin chain F precursor[Staphylococcus aureus subsp. aureus SA957]	NC_022442.1	1533880	1534857	BA000033.2	1e-07	1529963	1529993	31
AAATTTACAAACACTTTCTTTCTATATTAGG	17.889	84	98	1571409	0.017	69	47	23	SAZ172_0994	GNAT family acetyltransferase YjcF[Staphylococcus aureus subsp. aureus Z172]	NC_022604.1	1077258	1077692	BA000033.2	1e-07	1529346	1529316	31
AAATTTATTTGTTGGATATAAACCATATAGT	17.889	84	98	1572753	4e-09	609	639	31	lukS-PV	Panton-Valentine leukocidin chain S precursor[Staphylococcus aureus subsp. aureus SA957]	NC_022442.1	1534859	1535797	BA000033.2	1e-07	1530690	1530660	31
AAATTTCTCAGATTTTAACTTTTAATTTTAT	17.889	84	98	1572258	4e-09	164	194	31	lukF-PV	Panton-Valentine leukocidin chain F precursor[Staphylococcus aureus subsp. aureus SA957]	NC_022442.1	1533880	1534857	BA000033.2	1e-07	1530195	1530165	31
AAATTTGGATCATGTCCAGACATTTTACCTA	17.889	84	98	1572778	4e-09	614	584	31	lukS-PV	Panton-Valentine leukocidin chain S precursor[Staphylococcus aureus subsp. aureus SA957]	NC_022442.1	1534859	1535797	BA000033.2	1e-07	1530685	1530715	31
AAATTTTAACATATTTAAGATTTTTTGATTA	17.889	84	98	1571434	0.22	1402	1381	24	SLUG_15830	putative cardiolipin synthase[Staphylococcus lugdunensis N920143]	NC_017353.1	1657515	1658996	BA000033.2	1e-07	1529341	1529371	31
AAATTTTTAACTTATCGGAATCTGATGTTGC	17.889	84	98	1572283	4e-09	169	139	31	lukF-PV	Panton-Valentine leukocidin chain F precursor[Staphylococcus aureus subsp. aureus SA957]	NC_022442.1	1533880	1534857	BA000033.2	1e-07	1530190	1530220	31
AACAAAATCAAACTGAATATTTTGTGTGACC	17.889	84	98	1573200	4e-09	192	162	31	lukS-PV	Panton-Valentine leukocidin chain S precursor[Staphylococcus aureus subsp. aureus SA957]	NC_022442.1	1534859	1535797	AY954956.1	1e-07	24280	24250	31
AACAAACGGTAGGTTATTCTTATGGTGGAGA	17.889	84	98	1572018	4e-09	404	434	31	lukF-PV	Panton-Valentine leukocidin chain F precursor[Staphylococcus aureus subsp. aureus SA957]	NC_022442.1	1533880	1534857	BA000033.2	1e-07	1529955	1529925	31
AACAAAGACGCTTTGATTTTAAAAATGCAAG	17.889	84	98	1573154	4e-09	208	238	31	lukS-PV	Panton-Valentine leukocidin chain S precursor[Staphylococcus aureus subsp. aureus SA957]	NC_022442.1	1534859	1535797	AY954956.1	1e-07	24296	24326	31
AACAAATAAATTTGGATCATGTCCAGACATT	17.889	84	98	1572771	4e-09	621	591	31	lukS-PV	Panton-Valentine leukocidin chain S precursor[Staphylococcus aureus subsp. aureus SA957]	NC_022442.1	1534859	1535797	BA000033.2	1e-07	1530678	1530708	31
AACAACACACTATGGCAATAGTTATTTAGAA	17.889	84	98	1572552	4e-09	810	840	31	lukS-PV	Panton-Valentine leukocidin chain S precursor[Staphylococcus aureus subsp. aureus SA957]	NC_022442.1	1534859	1535797	BA000033.2	1e-07	1530489	1530459	31
AACAACTGATGATTTGACTATTTTTTTCATA	17.889	84	98	1572422	1e-08	30	1	30	lukF-PV	Panton-Valentine leukocidin chain F precursor[Staphylococcus aureus subsp. aureus SA957]	NC_022442.1	1533880	1534857	BA000033.2	1e-07	1530329	1530359	31
AACAACTGCAACATCAGATTCCGATAAGTTA	17.889	84	98	1572290	4e-09	132	162	31	lukF-PV	Panton-Valentine leukocidin chain F precursor[Staphylococcus aureus subsp. aureus SA957]	NC_022442.1	1533880	1534857	BA000033.2	1e-07	1530227	1530197	31
AACAAGAAAGCTATAGAACTAGCTTAGATAA	17.889	84	98	1571916	4e-09	506	536	31	lukF-PV	Panton-Valentine leukocidin chain F precursor[Staphylococcus aureus subsp. aureus SA957]	NC_022442.1	1533880	1534857	BA000033.2	1e-07	1529853	1529823	31
AACAATATTGAGAATATTGGTGATGGCGCTG	17.889	84	98	1573274	4e-09	88	118	31	lukS-PV	Panton-Valentine leukocidin chain S precursor[Staphylococcus aureus subsp. aureus SA957]	NC_022442.1	1534859	1535797	AY954956.1	1e-07	24176	24206	31
AACAATTAGTTATAATCAACAAAACTATATC	17.889	84	98	1572879	4e-09	483	513	31	lukS-PV	Panton-Valentine leukocidin chain S precursor[Staphylococcus aureus subsp. aureus SA957]	NC_022442.1	1534859	1535797	BA000033.2	1e-07	1530816	1530786	31
AACACACTATGGCAATAGTTATTTAGAAGGA	17.889	84	98	1572549	4e-09	813	843	31	lukS-PV	Panton-Valentine leukocidin chain S precursor[Staphylococcus aureus subsp. aureus SA957]	NC_022442.1	1534859	1535797	BA000033.2	1e-07	1530486	1530456	31
AACACAGATCATATAAAAGCAATGAGGTGGC	17.889	84	98	1573085	4e-09	277	307	31	lukS-PV	Panton-Valentine leukocidin chain S precursor[Staphylococcus aureus subsp. aureus SA957]	NC_022442.1	1534859	1535797	AY954956.1	1e-07	24365	24395	31
AACACTGGCATTTTGTGATATTCCAAGAAGT	17.889	84	98	1571733	4e-09	719	689	31	lukF-PV	Panton-Valentine leukocidin chain F precursor[Staphylococcus aureus subsp. aureus SA957]	NC_022442.1	1533880	1534857	BA000033.2	1e-07	1529640	1529670	31
AACACTTTCTTTCTATATTAGGGTAACCACG	17.889	84	98	1571400	2.8	65	47	19	SAZ172_0994	GNAT family acetyltransferase YjcF[Staphylococcus aureus subsp. aureus Z172]	NC_022604.1	1077258	1077692	BA000033.2	1e-07	1529337	1529307	31
AACAGAAATTACACAGTTAAATATGAAGTGA	17.889	84	98	1572494	4e-09	868	898	31	lukS-PV	Panton-Valentine leukocidin chain S precursor[Staphylococcus aureus subsp. aureus SA957]	NC_022442.1	1534859	1535797	BA000033.2	1e-07	1530431	1530401	31
AACAGATAGATAATCAAAAAATCTTAAATAT	17.889	84	98	1571444	0.79	126	108	20	qoxA	quinol oxidase subunit II[Staphylococcus pseudintermedius ED99]	NC_017568.1	1773635	1774735	BA000033.2	1e-07	1529381	1529351	31
AACAGGAGGTAATGGTTCATTTAATTATTCA	17.889	84	98	1572912	4e-09	450	480	31	lukS-PV	Panton-Valentine leukocidin chain S precursor[Staphylococcus aureus subsp. aureus SA957]	NC_022442.1	1534859	1535797	AY954956.1	1e-07	24538	24568	31
AACAGTTGCAATAAATGAAGGATTGAAACCA	17.889	84	98	1572666	4e-09	726	696	31	lukS-PV	Panton-Valentine leukocidin chain S precursor[Staphylococcus aureus subsp. aureus SA957]	NC_022442.1	1534859	1535797	BA000033.2	1e-07	1530573	1530603	31
AACATAGGTGGTAATTTTAATAGTGGTCCAT	17.889	84	98	1572944	4e-09	418	448	31	lukS-PV	Panton-Valentine leukocidin chain S precursor[Staphylococcus aureus subsp. aureus SA957]	NC_022442.1	1534859	1535797	AY954956.1	1e-07	24506	24536	31
AACATATCACACCTGTAAGTGAGAAAAAGGT	17.889	84	98	1572345	4e-09	77	107	31	lukF-PV	Panton-Valentine leukocidin chain F precursor[Staphylococcus aureus subsp. aureus SA957]	NC_022442.1	1533880	1534857	BA000033.2	1e-07	1530282	1530252	31
AACATATTTAAGATTTTTTGATTATCTATCT	17.889	84	98	1571441	0.22	1400	1374	31	SLUG_15830	putative cardiolipin synthase[Staphylococcus lugdunensis N920143]	NC_017353.1	1657515	1658996	BA000033.2	1e-07	1529348	1529378	31
AACATCAGATTCCGATAAGTTAAAAATTTCT	17.889	84	98	1572281	4e-09	141	171	31	lukF-PV	Panton-Valentine leukocidin chain F precursor[Staphylococcus aureus subsp. aureus SA957]	NC_022442.1	1533880	1534857	BA000033.2	1e-07	1530218	1530188	31
AACATCCATATTTCTGCCATACGTTATTTCA	17.889	84	98	1572600	4e-09	792	762	31	lukS-PV	Panton-Valentine leukocidin chain S precursor[Staphylococcus aureus subsp. aureus SA957]	NC_022442.1	1534859	1535797	BA000033.2	1e-07	1530507	1530537	31
AACATCCCAACCAATTTTTTTGAAATTAGTT	17.889	84	98	1571882	4e-09	570	540	31	lukF-PV	Panton-Valentine leukocidin chain F precursor[Staphylococcus aureus subsp. aureus SA957]	NC_022442.1	1533880	1534857	BA000033.2	1e-07	1529789	1529819	31
AACATTTACTGAATCTATTTTATTTTTAGGT	17.889	84	98	1572993	4e-09	399	369	31	lukS-PV	Panton-Valentine leukocidin chain S precursor[Staphylococcus aureus subsp. aureus SA957]	NC_022442.1	1534859	1535797	AY954956.1	1e-07	24487	24457	31
AACATTTATTCTGGCTATACAAAGCCAAATC	17.889	84	98	1572178	4e-09	244	274	31	lukF-PV	Panton-Valentine leukocidin chain F precursor[Staphylococcus aureus subsp. aureus SA957]	NC_022442.1	1533880	1534857	BA000033.2	1e-07	1530115	1530085	31
AACATTTCAATTAATTCAGATTCTAATGACT	17.889	84	98	1572103	4e-09	319	349	31	lukF-PV	Panton-Valentine leukocidin chain F precursor[Staphylococcus aureus subsp. aureus SA957]	NC_022442.1	1533880	1534857	BA000033.2	1e-07	1530040	1530010	31
AACATTTCATTACCATAAGTTGAATGATAAC	17.889	84	98	1571802	4e-09	650	620	31	lukF-PV	Panton-Valentine leukocidin chain F precursor[Staphylococcus aureus subsp. aureus SA957]	NC_022442.1	1533880	1534857	BA000033.2	1e-07	1529709	1529739	31
AACCAATTTTTTTGAAATTAGTTCTTTTATC	17.889	84	98	1571890	4e-09	562	532	31	lukF-PV	Panton-Valentine leukocidin chain F precursor[Staphylococcus aureus subsp. aureus SA957]	NC_022442.1	1533880	1534857	BA000033.2	1e-07	1529797	1529827	31
AACCACGTCAATTAAGACGTGGTTACCCTAA	17.889	84	98	1571383	3e-05	165	188	24	MS7_0645	pyridine nucleotide-disulfide oxidoreductase family protein[Staphylococcus aureus subsp. aureus 11819-97]	NC_017351.1	686824	687024	BA000033.2	1e-07	1529290	1529320	31
AACCACTGTGTACTAATGGGGGTAATTCATT	17.889	84	98	1572692	4e-09	700	670	31	lukS-PV	Panton-Valentine leukocidin chain S precursor[Staphylococcus aureus subsp. aureus SA957]	NC_022442.1	1534859	1535797	BA000033.2	1e-07	1530599	1530629	31
AACCATTACCTCCTGTTGATGGACCACTATT	17.889	84	98	1572926	4e-09	466	436	31	lukS-PV	Panton-Valentine leukocidin chain S precursor[Staphylococcus aureus subsp. aureus SA957]	NC_022442.1	1534859	1535797	AY954956.1	1e-07	24554	24524	31
AACCCCAATAAAATTGAGAACTAATAGTGTC	17.889	84	98	1572142	4e-09	310	280	31	lukF-PV	Panton-Valentine leukocidin chain F precursor[Staphylococcus aureus subsp. aureus SA957]	NC_022442.1	1533880	1534857	BA000033.2	1e-07	1530049	1530079	31
AACCTAATGTTTGACTAACATTTACTGAATC	17.889	84	98	1572977	4e-09	415	385	31	lukS-PV	Panton-Valentine leukocidin chain S precursor[Staphylococcus aureus subsp. aureus SA957]	NC_022442.1	1534859	1535797	AY954956.1	1e-07	24503	24473	31
AACCTACCGTTTGTTGTACTTGAAATTCTTC	17.889	84	98	1572034	4e-09	418	388	31	lukF-PV	Panton-Valentine leukocidin chain F precursor[Staphylococcus aureus subsp. aureus SA957]	NC_022442.1	1533880	1534857	BA000033.2	1e-07	1529941	1529971	31
AACCTTTTTCTCACTTACAGGTGTGATATGT	17.889	84	98	1572344	4e-09	108	78	31	lukF-PV	Panton-Valentine leukocidin chain F precursor[Staphylococcus aureus subsp. aureus SA957]	NC_022442.1	1533880	1534857	BA000033.2	1e-07	1530251	1530281	31
AACGAAGTAGCAATAGGAGTGATTATTCCTA	17.889	84	98	1573324	4e-09	68	38	31	lukS-PV	Panton-Valentine leukocidin chain S precursor[Staphylococcus aureus subsp. aureus SA957]	NC_022442.1	1534859	1535797	AY954956.1	1e-07	24156	24126	31
AACGCATTTGTAAACAGAAATTACACAGTTA	17.889	84	98	1572506	4e-09	856	886	31	lukS-PV	Panton-Valentine leukocidin chain S precursor[Staphylococcus aureus subsp. aureus SA957]	NC_022442.1	1534859	1535797	BA000033.2	1e-07	1530443	1530413	31
AACGGTAGGTTATTCTTATGGTGGAGATATT	17.889	84	98	1572014	4e-09	408	438	31	lukF-PV	Panton-Valentine leukocidin chain F precursor[Staphylococcus aureus subsp. aureus SA957]	NC_022442.1	1533880	1534857	BA000033.2	1e-07	1529951	1529921	31
AACGTATGGCAGAAATATGGATGTTACTCAT	17.889	84	98	1572594	4e-09	768	798	31	lukS-PV	Panton-Valentine leukocidin chain S precursor[Staphylococcus aureus subsp. aureus SA957]	NC_022442.1	1534859	1535797	BA000033.2	1e-07	1530531	1530501	31
AACGTTGTAGATTATGCACCTAAAAATCAAA	17.889	84	98	1572067	4e-09	355	385	31	lukF-PV	Panton-Valentine leukocidin chain F precursor[Staphylococcus aureus subsp. aureus SA957]	NC_022442.1	1533880	1534857	BA000033.2	1e-07	1530004	1529974	31
AACGTTTACTGAGTCATTAGAATCTGAATTA	17.889	84	98	1572092	4e-09	360	330	31	lukF-PV	Panton-Valentine leukocidin chain F precursor[Staphylococcus aureus subsp. aureus SA957]	NC_022442.1	1533880	1534857	BA000033.2	1e-07	1529999	1530029	31
AACTAATAGTGTCTTTTGGATTTGGCTTTGT	17.889	84	98	1572160	4e-09	292	262	31	lukF-PV	Panton-Valentine leukocidin chain F precursor[Staphylococcus aureus subsp. aureus SA957]	NC_022442.1	1533880	1534857	BA000033.2	1e-07	1530067	1530097	31
AACTAATTGTTTTTGAATAATTAAATGAACC	17.889	84	98	1572899	4e-09	493	463	31	lukS-PV	Panton-Valentine leukocidin chain S precursor[Staphylococcus aureus subsp. aureus SA957]	NC_022442.1	1534859	1535797	AY954956.1	1e-07	24581	24551	31
AACTAGCTTAGATAAAAGAACTAATTTCAAA	17.889	84	98	1571900	4e-09	522	552	31	lukF-PV	Panton-Valentine leukocidin chain F precursor[Staphylococcus aureus subsp. aureus SA957]	NC_022442.1	1533880	1534857	BA000033.2	1e-07	1529837	1529807	31
AACTATAAACAAGAAAGCTATAGAACTAGCT	17.889	84	98	1571923	4e-09	499	529	31	lukF-PV	Panton-Valentine leukocidin chain F precursor[Staphylococcus aureus subsp. aureus SA957]	NC_022442.1	1533880	1534857	BA000033.2	1e-07	1529860	1529830	31
AACTATCTCTGCCATATGGTCCCCAACCATT	17.889	84	98	1571830	4e-09	622	592	31	lukF-PV	Panton-Valentine leukocidin chain F precursor[Staphylococcus aureus subsp. aureus SA957]	NC_022442.1	1533880	1534857	BA000033.2	1e-07	1529737	1529767	31
AACTATTGCCATAGTGTGTTGTTCTTCTAGT	17.889	84	98	1572560	4e-09	832	802	31	lukS-PV	Panton-Valentine leukocidin chain S precursor[Staphylococcus aureus subsp. aureus SA957]	NC_022442.1	1534859	1535797	BA000033.2	1e-07	1530467	1530497	31
AACTCATGAAATTAAAGTGAAAGGACATAAT	17.889	84	98	1572456	4e-09	906	936	31	lukS-PV	Panton-Valentine leukocidin chain S precursor[Staphylococcus aureus subsp. aureus SA957]	NC_022442.1	1534859	1535797	BA000033.2	1e-07	1530393	1530363	31
AACTGAATATTTTGTGTGACCCCCCACTTAT	17.889	84	98	1573210	4e-09	182	152	31	lukS-PV	Panton-Valentine leukocidin chain S precursor[Staphylococcus aureus subsp. aureus SA957]	NC_022442.1	1534859	1535797	AY954956.1	1e-07	24270	24240	31
AACTGATGATTTGACTATTTTTTTCATATCA	17.889	84	98	1572425	6e-07	27	1	27	lukF-PV	Panton-Valentine leukocidin chain F precursor[Staphylococcus aureus subsp. aureus SA957]	NC_022442.1	1533880	1534857	BA000033.2	1e-07	1530332	1530362	31
AACTGCAACATCAGATTCCGATAAGTTAAAA	17.889	84	98	1572287	4e-09	135	165	31	lukF-PV	Panton-Valentine leukocidin chain F precursor[Staphylococcus aureus subsp. aureus SA957]	NC_022442.1	1533880	1534857	BA000033.2	1e-07	1530224	1530194	31
AACTGGAAAACTCATGAAATTAAAGTGAAAG	17.889	84	98	1572464	4e-09	898	928	31	lukS-PV	Panton-Valentine leukocidin chain S precursor[Staphylococcus aureus subsp. aureus SA957]	NC_022442.1	1534859	1535797	BA000033.2	1e-07	1530401	1530371	31
AACTGTATGATTTTCCCAATCAACTTCATAA	17.889	84	98	1571519	4e-09	933	903	31	lukF-PV	Panton-Valentine leukocidin chain F precursor[Staphylococcus aureus subsp. aureus SA957]	NC_022442.1	1533880	1534857	BA000033.2	1e-07	1529426	1529456	31
AACTGTATTGGATAGCAAAAGCAATGCAATT	17.889	84	98	1572386	4e-09	66	36	31	lukF-PV	Panton-Valentine leukocidin chain F precursor[Staphylococcus aureus subsp. aureus SA957]	NC_022442.1	1533880	1534857	BA000033.2	1e-07	1530293	1530323	31
AACTGTGTAATTTCTGTTTACAAATGCGTTG	17.889	84	98	1572507	4e-09	885	855	31	lukS-PV	Panton-Valentine leukocidin chain S precursor[Staphylococcus aureus subsp. aureus SA957]	NC_022442.1	1534859	1535797	BA000033.2	1e-07	1530414	1530444	31
AACTGTTTCTCATGAAAAAGGCTCAGGAGAT	17.889	84	98	1572642	4e-09	720	750	31	lukS-PV	Panton-Valentine leukocidin chain S precursor[Staphylococcus aureus subsp. aureus SA957]	NC_022442.1	1534859	1535797	BA000033.2	1e-07	1530579	1530549	31
AACTTAAATGCTGGACAAAACTTCTTGGAAT	17.889	84	98	1571752	4e-09	670	700	31	lukF-PV	Panton-Valentine leukocidin chain F precursor[Staphylococcus aureus subsp. aureus SA957]	NC_022442.1	1533880	1534857	BA000033.2	1e-07	1529689	1529659	31
AACTTATGGTAATGAAATGTTTTTAGGCTCA	17.889	84	98	1571792	4e-09	630	660	31	lukF-PV	Panton-Valentine leukocidin chain F precursor[Staphylococcus aureus subsp. aureus SA957]	NC_022442.1	1533880	1534857	BA000033.2	1e-07	1529729	1529699	31
AACTTCAATCCAGAATTTATTGGTGTCCTAT	17.889	84	98	1571692	4e-09	730	760	31	lukF-PV	Panton-Valentine leukocidin chain F precursor[Staphylococcus aureus subsp. aureus SA957]	NC_022442.1	1533880	1534857	BA000033.2	1e-07	1529629	1529599	31
AACTTCACTGGATAGGTAATAATTATAAAGA	17.889	84	98	1571577	4e-09	845	875	31	lukF-PV	Panton-Valentine leukocidin chain F precursor[Staphylococcus aureus subsp. aureus SA957]	NC_022442.1	1533880	1534857	BA000033.2	1e-07	1529514	1529484	31
AACTTCTTGGAATATCACAAAATGCCAGTGT	17.889	84	98	1571734	4e-09	688	718	31	lukF-PV	Panton-Valentine leukocidin chain F precursor[Staphylococcus aureus subsp. aureus SA957]	NC_022442.1	1533880	1534857	BA000033.2	1e-07	1529671	1529641	31
AACTTTTAATTTTATTAAAGATAAAAGTTAT	17.889	84	98	1572242	4e-09	180	210	31	lukF-PV	Panton-Valentine leukocidin chain F precursor[Staphylococcus aureus subsp. aureus SA957]	NC_022442.1	1533880	1534857	BA000033.2	1e-07	1530179	1530149	31
AACTTTTATCTTTAATAAAATTAAAAGTTAA	17.889	84	98	1572244	4e-09	208	178	31	lukF-PV	Panton-Valentine leukocidin chain F precursor[Staphylococcus aureus subsp. aureus SA957]	NC_022442.1	1533880	1534857	BA000033.2	1e-07	1530151	1530181	31
AACTTTTGGAATCAACTTCACTGGATAGGTA	17.889	84	98	1571590	4e-09	832	862	31	lukF-PV	Panton-Valentine leukocidin chain F precursor[Staphylococcus aureus subsp. aureus SA957]	NC_022442.1	1533880	1534857	BA000033.2	1e-07	1529527	1529497	31
AAGAAAGCTATAGAACTAGCTTAGATAAAAG	17.889	84	98	1571913	4e-09	509	539	31	lukF-PV	Panton-Valentine leukocidin chain F precursor[Staphylococcus aureus subsp. aureus SA957]	NC_022442.1	1533880	1534857	BA000033.2	1e-07	1529850	1529820	31
AAGAAAGTGTTTGTAAATTTTAACATATTTA	17.889	84	98	1571420	0.79	2051	2029	23	SPSINT_0503	primase, superantigen-encoding pathogenicity islands SaPI[Staphylococcus pseudintermedius HKU10-03]	NC_014925.1	548920	551289	BA000033.2	1e-07	1529327	1529357	31
AAGAACAACACACTATGGCAATAGTTATTTA	17.889	84	98	1572555	4e-09	807	837	31	lukS-PV	Panton-Valentine leukocidin chain S precursor[Staphylococcus aureus subsp. aureus SA957]	NC_022442.1	1534859	1535797	BA000033.2	1e-07	1530492	1530462	31
AAGAACTAATTTCAAAAAAATTGGTTGGGAT	17.889	84	98	1571885	4e-09	537	567	31	lukF-PV	Panton-Valentine leukocidin chain F precursor[Staphylococcus aureus subsp. aureus SA957]	NC_022442.1	1533880	1534857	BA000033.2	1e-07	1529822	1529792	31
AAGAATAACCTACCGTTTGTTGTACTTGAAA	17.889	84	98	1572028	4e-09	424	394	31	lukF-PV	Panton-Valentine leukocidin chain F precursor[Staphylococcus aureus subsp. aureus SA957]	NC_022442.1	1533880	1534857	BA000033.2	1e-07	1529935	1529965	31
AAGAATTTCAAGTACAACAAACGGTAGGTTA	17.889	84	98	1572033	4e-09	389	419	31	lukF-PV	Panton-Valentine leukocidin chain F precursor[Staphylococcus aureus subsp. aureus SA957]	NC_022442.1	1533880	1534857	BA000033.2	1e-07	1529970	1529940	31
AAGACAAAGCAACTTAAATGCTGGACAAAAC	17.889	84	98	1571762	4e-09	660	690	31	lukF-PV	Panton-Valentine leukocidin chain F precursor[Staphylococcus aureus subsp. aureus SA957]	NC_022442.1	1533880	1534857	BA000033.2	1e-07	1529699	1529669	31
AAGACACTATTAGTTCTCAATTTTATTGGGG	17.889	84	98	1572144	4e-09	278	308	31	lukF-PV	Panton-Valentine leukocidin chain F precursor[Staphylococcus aureus subsp. aureus SA957]	NC_022442.1	1533880	1534857	BA000033.2	1e-07	1530081	1530051	31
AAGACGTGGTTACCCTAATATAGAAAGAAAG	17.889	84	98	1571396	NA	NA	NA	NA	NA	NA	NA	NA	NA	BA000033.2	1e-07	1529303	1529333	31
AAGACTACTTATTACAATTACAAAAACACAG	17.889	84	98	1573109	4e-09	253	283	31	lukS-PV	Panton-Valentine leukocidin chain S precursor[Staphylococcus aureus subsp. aureus SA957]	NC_022442.1	1534859	1535797	AY954956.1	1e-07	24341	24371	31
AAGAGAAATGGATAGATATACAAACTTTTGG	17.889	84	98	1571612	4e-09	810	840	31	lukF-PV	Panton-Valentine leukocidin chain F precursor[Staphylococcus aureus subsp. aureus SA957]	NC_022442.1	1533880	1534857	BA000033.2	1e-07	1529549	1529519	31
AAGATAAAAAGTATAACAAAGACGCTTTGAT	17.889	84	98	1573168	4e-09	194	224	31	lukS-PV	Panton-Valentine leukocidin chain S precursor[Staphylococcus aureus subsp. aureus SA957]	NC_022442.1	1534859	1535797	AY954956.1	1e-07	24282	24312	31
AAGATAAAAGTTATGATAAAGATACATTAAT	17.889	84	98	1572225	4e-09	197	227	31	lukF-PV	Panton-Valentine leukocidin chain F precursor[Staphylococcus aureus subsp. aureus SA957]	NC_022442.1	1533880	1534857	BA000033.2	1e-07	1530162	1530132	31
AAGATACATTAATACTCAAAGCTGCTGGAAA	17.889	84	98	1572207	4e-09	215	245	31	lukF-PV	Panton-Valentine leukocidin chain F precursor[Staphylococcus aureus subsp. aureus SA957]	NC_022442.1	1533880	1534857	BA000033.2	1e-07	1530144	1530114	31
AAGATTTTTTGATTATCTATCTGTTTAGCTC	17.889	84	98	1571450	0.79	108	126	20	qoxA	quinol oxidase subunit II[Staphylococcus pseudintermedius ED99]	NC_017568.1	1773635	1774735	BA000033.2	1e-07	1529357	1529387	31
AAGCAACTTAAATGCTGGACAAAACTTCTTG	17.889	84	98	1571756	4e-09	666	696	31	lukF-PV	Panton-Valentine leukocidin chain F precursor[Staphylococcus aureus subsp. aureus SA957]	NC_022442.1	1533880	1534857	BA000033.2	1e-07	1529693	1529663	31
AAGCAATGAGGTGGCCTTTCCAATACAATAT	17.889	84	98	1573069	4e-09	293	323	31	lukS-PV	Panton-Valentine leukocidin chain S precursor[Staphylococcus aureus subsp. aureus SA957]	NC_022442.1	1534859	1535797	AY954956.1	1e-07	24381	24411	31
AAGCAATGCAATTGATGTAACAACTGATGAT	17.889	84	98	1572404	4e-09	48	18	31	lukF-PV	Panton-Valentine leukocidin chain F precursor[Staphylococcus aureus subsp. aureus SA957]	NC_022442.1	1533880	1534857	BA000033.2	1e-07	1530311	1530341	31
AAGCCAAATCCAAAAGACACTATTAGTTCTC	17.889	84	98	1572157	4e-09	265	295	31	lukF-PV	Panton-Valentine leukocidin chain F precursor[Staphylococcus aureus subsp. aureus SA957]	NC_022442.1	1533880	1534857	BA000033.2	1e-07	1530094	1530064	31
AAGCCGTTAGAGATATTAATATCTCCACCAT	17.889	84	98	1571997	4e-09	455	425	31	lukF-PV	Panton-Valentine leukocidin chain F precursor[Staphylococcus aureus subsp. aureus SA957]	NC_022442.1	1533880	1534857	BA000033.2	1e-07	1529904	1529934	31
AAGCGTCTTTGTTATACTTTTTATCTTTAAC	17.889	84	98	1573172	4e-09	220	190	31	lukS-PV	Panton-Valentine leukocidin chain S precursor[Staphylococcus aureus subsp. aureus SA957]	NC_022442.1	1534859	1535797	AY954956.1	1e-07	24308	24278	31
AAGCTAATTCATTTATCACATCATTAGGTAA	17.889	84	98	1572802	4e-09	560	590	31	lukS-PV	Panton-Valentine leukocidin chain S precursor[Staphylococcus aureus subsp. aureus SA957]	NC_022442.1	1534859	1535797	BA000033.2	1e-07	1530739	1530709	31
AAGCTAGTTCTATAGCTTTCTTGTTTATAGT	17.889	84	98	1571922	4e-09	530	500	31	lukF-PV	Panton-Valentine leukocidin chain F precursor[Staphylococcus aureus subsp. aureus SA957]	NC_022442.1	1533880	1534857	BA000033.2	1e-07	1529829	1529859	31
AAGCTATAGAACTAGCTTAGATAAAAGAACT	17.889	84	98	1571909	4e-09	513	543	31	lukF-PV	Panton-Valentine leukocidin chain F precursor[Staphylococcus aureus subsp. aureus SA957]	NC_022442.1	1533880	1534857	BA000033.2	1e-07	1529846	1529816	31
AAGCTGATAACAATATTGAGAATATTGGTGA	17.889	84	98	1573282	4e-09	80	110	31	lukS-PV	Panton-Valentine leukocidin chain S precursor[Staphylococcus aureus subsp. aureus SA957]	NC_022442.1	1534859	1535797	AY954956.1	1e-07	24168	24198	31
AAGCTGCTGGAAACATTTATTCTGGCTATAC	17.889	84	98	1572189	4e-09	233	263	31	lukF-PV	Panton-Valentine leukocidin chain F precursor[Staphylococcus aureus subsp. aureus SA957]	NC_022442.1	1533880	1534857	BA000033.2	1e-07	1530126	1530096	31
AAGGAAAAAAATCCTATGAGCTAAACAGATA	17.889	84	98	1571467	2e-07	955	986	32	SAAG_02096	panton-Valentine leukocidin chain F protein[Staphylococcus aureus subsp. aureus 55/2053]	NC_022113.1	1460399	1461385	BA000033.2	1e-07	1529404	1529374	31
AAGGACATAATTGATATGAAAAAAATAGTCA	17.889	84	98	1572436	0.22	357	337	21	STP1_0412	putative exonuclease[Staphylococcus pasteuri SP1]	NC_022737.1	472128	472682	BA000033.2	1e-07	1530373	1530343	31
AAGGATCTAGAATACACAACGCATTTGTAAA	17.889	84	98	1572523	4e-09	839	869	31	lukS-PV	Panton-Valentine leukocidin chain S precursor[Staphylococcus aureus subsp. aureus SA957]	NC_022442.1	1534859	1535797	BA000033.2	1e-07	1530460	1530430	31
AAGGATTGAAACCACTGTGTACTAATGGGGG	17.889	84	98	1572683	4e-09	709	679	31	lukS-PV	Panton-Valentine leukocidin chain S precursor[Staphylococcus aureus subsp. aureus SA957]	NC_022442.1	1534859	1535797	BA000033.2	1e-07	1530590	1530620	31
AAGGCCACCTCATTGCTTTTATATGATCTGT	17.889	84	98	1573082	4e-09	310	280	31	lukS-PV	Panton-Valentine leukocidin chain S precursor[Staphylococcus aureus subsp. aureus SA957]	NC_022442.1	1534859	1535797	AY954956.1	1e-07	24398	24368	31
AAGGCTCAGGAGATACAAGTGAATTTGAAAT	17.889	84	98	1572625	4e-09	737	767	31	lukS-PV	Panton-Valentine leukocidin chain S precursor[Staphylococcus aureus subsp. aureus SA957]	NC_022442.1	1534859	1535797	BA000033.2	1e-07	1530562	1530532	31
AAGGTTTTATCAATTCAAAGACTACTTATTA	17.889	84	98	1573126	4e-09	236	266	31	lukS-PV	Panton-Valentine leukocidin chain S precursor[Staphylococcus aureus subsp. aureus SA957]	NC_022442.1	1534859	1535797	AY954956.1	1e-07	24324	24354	31
AAGTAATTTTATCATCAACCTTTTTCTCACT	17.889	84	98	1572328	4e-09	124	94	31	lukF-PV	Panton-Valentine leukocidin chain F precursor[Staphylococcus aureus subsp. aureus SA957]	NC_022442.1	1533880	1534857	BA000033.2	1e-07	1530235	1530265	31
AAGTACAACAAACGGTAGGTTATTCTTATGG	17.889	84	98	1572024	4e-09	398	428	31	lukF-PV	Panton-Valentine leukocidin chain F precursor[Staphylococcus aureus subsp. aureus SA957]	NC_022442.1	1533880	1534857	BA000033.2	1e-07	1529961	1529931	31
AAGTACAACATTTCAATTAATTCAGATTCTA	17.889	84	98	1572109	4e-09	313	343	31	lukF-PV	Panton-Valentine leukocidin chain F precursor[Staphylococcus aureus subsp. aureus SA957]	NC_022442.1	1533880	1534857	BA000033.2	1e-07	1530046	1530016	31
AAGTAGCAATAGGAGTGATTATTCCTAACGA	17.889	84	98	1573328	4e-09	64	34	31	lukS-PV	Panton-Valentine leukocidin chain S precursor[Staphylococcus aureus subsp. aureus SA957]	NC_022442.1	1534859	1535797	AY954956.1	1e-07	24152	24122	31
AAGTAGTCTTTGAATTGATAAAACCTTGCAT	17.889	84	98	1573130	4e-09	262	232	31	lukS-PV	Panton-Valentine leukocidin chain S precursor[Staphylococcus aureus subsp. aureus SA957]	NC_022442.1	1534859	1535797	AY954956.1	1e-07	24350	24320	31
AAGTATAACAAAGACGCTTTGATTTTAAAAA	17.889	84	98	1573160	4e-09	202	232	31	lukS-PV	Panton-Valentine leukocidin chain S precursor[Staphylococcus aureus subsp. aureus SA957]	NC_022442.1	1534859	1535797	AY954956.1	1e-07	24290	24320	31
AAGTGAAAGGACATAATTGATATGAAAAAAA	17.889	84	98	1572442	0.005	920	939	20	lukS-PV	Panton-Valentine leukocidin chain S precursor[Staphylococcus aureus subsp. aureus SA957]	NC_022442.1	1534859	1535797	BA000033.2	1e-07	1530379	1530349	31
AAGTGAACTGGAAAACTCATGAAATTAAAGT	17.889	84	98	1572469	4e-09	893	923	31	lukS-PV	Panton-Valentine leukocidin chain S precursor[Staphylococcus aureus subsp. aureus SA957]	NC_022442.1	1534859	1535797	BA000033.2	1e-07	1530406	1530376	31
AAGTGAATTTGAAATAACGTATGGCAGAAAT	17.889	84	98	1572609	4e-09	753	783	31	lukS-PV	Panton-Valentine leukocidin chain S precursor[Staphylococcus aureus subsp. aureus SA957]	NC_022442.1	1534859	1535797	BA000033.2	1e-07	1530546	1530516	31
AAGTGAGAAAAAGGTTGATGATAAAATTACT	17.889	84	98	1572329	4e-09	93	123	31	lukF-PV	Panton-Valentine leukocidin chain F precursor[Staphylococcus aureus subsp. aureus SA957]	NC_022442.1	1533880	1534857	BA000033.2	1e-07	1530266	1530236	31
AAGTGGGGGGTCACACAAAATATTCAGTTTG	17.889	84	98	1573208	4e-09	154	184	31	lukS-PV	Panton-Valentine leukocidin chain S precursor[Staphylococcus aureus subsp. aureus SA957]	NC_022442.1	1534859	1535797	AY954956.1	1e-07	24242	24272	31
AAGTGTTCAATGGGGAATAAAAGCTAATTCA	17.889	84	98	1572822	4e-09	540	570	31	lukS-PV	Panton-Valentine leukocidin chain S precursor[Staphylococcus aureus subsp. aureus SA957]	NC_022442.1	1534859	1535797	BA000033.2	1e-07	1530759	1530729	31
AAGTGTTTGTAAATTTTAACATATTTAAGAT	17.889	84	98	1571424	0.79	2051	2029	23	SPSINT_0503	primase, superantigen-encoding pathogenicity islands SaPI[Staphylococcus pseudintermedius HKU10-03]	NC_014925.1	548920	551289	BA000033.2	1e-07	1529331	1529361	31
AAGTTAAAAATTTCTCAGATTTTAACTTTTA	17.889	84	98	1572265	4e-09	157	187	31	lukF-PV	Panton-Valentine leukocidin chain F precursor[Staphylococcus aureus subsp. aureus SA957]	NC_022442.1	1533880	1534857	BA000033.2	1e-07	1530202	1530172	31
AAGTTAAAATCTGAGAAATTTTTAACTTATC	17.889	84	98	1572268	4e-09	184	154	31	lukF-PV	Panton-Valentine leukocidin chain F precursor[Staphylococcus aureus subsp. aureus SA957]	NC_022442.1	1533880	1534857	BA000033.2	1e-07	1530175	1530205	31
AAGTTACCTCTGGATAACACTGGCATTTTGT	17.889	84	98	1571718	4e-09	734	704	31	lukF-PV	Panton-Valentine leukocidin chain F precursor[Staphylococcus aureus subsp. aureus SA957]	NC_022442.1	1533880	1534857	BA000033.2	1e-07	1529625	1529655	31
AAGTTATGATAAAGATACATTAATACTCAAA	17.889	84	98	1572218	4e-09	204	234	31	lukF-PV	Panton-Valentine leukocidin chain F precursor[Staphylococcus aureus subsp. aureus SA957]	NC_022442.1	1533880	1534857	BA000033.2	1e-07	1530155	1530125	31
AAGTTGAATGATAACTATCTCTGCCATATGG	17.889	84	98	1571818	4e-09	634	604	31	lukF-PV	Panton-Valentine leukocidin chain F precursor[Staphylococcus aureus subsp. aureus SA957]	NC_022442.1	1533880	1534857	BA000033.2	1e-07	1529725	1529755	31
AAGTTGATTCCAAAAGTTTGTATATCTATCC	17.889	84	98	1571603	4e-09	849	819	31	lukF-PV	Panton-Valentine leukocidin chain F precursor[Staphylococcus aureus subsp. aureus SA957]	NC_022442.1	1533880	1534857	BA000033.2	1e-07	1529510	1529540	31
AAGTTTGTATATCTATCCATTTCTCTTTGAT	17.889	84	98	1571616	4e-09	836	806	31	lukF-PV	Panton-Valentine leukocidin chain F precursor[Staphylococcus aureus subsp. aureus SA957]	NC_022442.1	1533880	1534857	BA000033.2	1e-07	1529523	1529553	31
AAGTTTTGTCCAGCATTTAAGTTGCTTTGTC	17.889	84	98	1571760	4e-09	692	662	31	lukF-PV	Panton-Valentine leukocidin chain F precursor[Staphylococcus aureus subsp. aureus SA957]	NC_022442.1	1533880	1534857	BA000033.2	1e-07	1529667	1529697	31
AATAAAAGCTAATTCATTTATCACATCATTA	17.889	84	98	1572807	4e-09	555	585	31	lukS-PV	Panton-Valentine leukocidin chain S precursor[Staphylococcus aureus subsp. aureus SA957]	NC_022442.1	1534859	1535797	BA000033.2	1e-07	1530744	1530714	31
AATAAAATAGATTCAGTAAATGTTAGTCAAA	17.889	84	98	1572986	4e-09	376	406	31	lukS-PV	Panton-Valentine leukocidin chain S precursor[Staphylococcus aureus subsp. aureus SA957]	NC_022442.1	1534859	1535797	AY954956.1	1e-07	24464	24494	31
AATAAAATTAAAAGTTAAAATCTGAGAAATT	17.889	84	98	1572257	4e-09	195	165	31	lukF-PV	Panton-Valentine leukocidin chain F precursor[Staphylococcus aureus subsp. aureus SA957]	NC_022442.1	1533880	1534857	BA000033.2	1e-07	1530164	1530194	31
AATAAAATTGAGAACTAATAGTGTCTTTTGG	17.889	84	98	1572148	4e-09	304	274	31	lukF-PV	Panton-Valentine leukocidin chain F precursor[Staphylococcus aureus subsp. aureus SA957]	NC_022442.1	1533880	1534857	BA000033.2	1e-07	1530055	1530085	31
AATAAATGAAGGATTGAAACCACTGTGTACT	17.889	84	98	1572675	4e-09	717	687	31	lukS-PV	Panton-Valentine leukocidin chain S precursor[Staphylococcus aureus subsp. aureus SA957]	NC_022442.1	1534859	1535797	BA000033.2	1e-07	1530582	1530612	31
AATAAATGTTTCCAGCAGCTTTGAGTATTAA	17.889	84	98	1572199	4e-09	253	223	31	lukF-PV	Panton-Valentine leukocidin chain F precursor[Staphylococcus aureus subsp. aureus SA957]	NC_022442.1	1533880	1534857	BA000033.2	1e-07	1530106	1530136	31
AATAAATTCTGGATTGAAGTTACCTCTGGAT	17.889	84	98	1571702	4e-09	750	720	31	lukF-PV	Panton-Valentine leukocidin chain F precursor[Staphylococcus aureus subsp. aureus SA957]	NC_022442.1	1533880	1534857	BA000033.2	1e-07	1529609	1529639	31
AATAAATTTGGATCATGTCCAGACATTTTAC	17.889	84	98	1572775	4e-09	617	587	31	lukS-PV	Panton-Valentine leukocidin chain S precursor[Staphylococcus aureus subsp. aureus SA957]	NC_022442.1	1534859	1535797	BA000033.2	1e-07	1530682	1530712	31
AATAACCACGTCAATTAAGACGTGGTTACCC	17.889	84	98	1571380	6e-07	162	188	27	MS7_0645	pyridine nucleotide-disulfide oxidoreductase family protein[Staphylococcus aureus subsp. aureus 11819-97]	NC_017351.1	686824	687024	BA000033.2	1e-07	1529287	1529317	31
AATAACCTACCGTTTGTTGTACTTGAAATTC	17.889	84	98	1572031	4e-09	421	391	31	lukF-PV	Panton-Valentine leukocidin chain F precursor[Staphylococcus aureus subsp. aureus SA957]	NC_022442.1	1533880	1534857	BA000033.2	1e-07	1529938	1529968	31
AATAACGTATGGCAGAAATATGGATGTTACT	17.889	84	98	1572597	4e-09	765	795	31	lukS-PV	Panton-Valentine leukocidin chain S precursor[Staphylococcus aureus subsp. aureus SA957]	NC_022442.1	1534859	1535797	BA000033.2	1e-07	1530534	1530504	31
AATAACTATTGCCATAGTGTGTTGTTCTTCT	17.889	84	98	1572557	4e-09	835	805	31	lukS-PV	Panton-Valentine leukocidin chain S precursor[Staphylococcus aureus subsp. aureus SA957]	NC_022442.1	1534859	1535797	BA000033.2	1e-07	1530464	1530494	31
AATAAGTAGTCTTTGAATTGATAAAACCTTG	17.889	84	98	1573127	4e-09	265	235	31	lukS-PV	Panton-Valentine leukocidin chain S precursor[Staphylococcus aureus subsp. aureus SA957]	NC_022442.1	1534859	1535797	AY954956.1	1e-07	24353	24323	31
AATAATCACTCCTATTGCTACTTCGTTTCAT	17.889	84	98	1573320	4e-09	42	72	31	lukS-PV	Panton-Valentine leukocidin chain S precursor[Staphylococcus aureus subsp. aureus SA957]	NC_022442.1	1534859	1535797	AY954956.1	1e-07	24130	24160	31
AATAATGGTTGGGGACCATATGGCAGAGATA	17.889	84	98	1571833	4e-09	589	619	31	lukF-PV	Panton-Valentine leukocidin chain F precursor[Staphylococcus aureus subsp. aureus SA957]	NC_022442.1	1533880	1534857	AB044554.1	1e-07	41800	41830	31
AATAATTAAATGAACCATTACCTCCTGTTGA	17.889	84	98	1572914	4e-09	478	448	31	lukS-PV	Panton-Valentine leukocidin chain S precursor[Staphylococcus aureus subsp. aureus SA957]	NC_022442.1	1534859	1535797	AY954956.1	1e-07	24566	24536	31
AATAATTATAAAGATGAAAATAGAGCAACTC	17.889	84	98	1571560	4e-09	862	892	31	lukF-PV	Panton-Valentine leukocidin chain F precursor[Staphylococcus aureus subsp. aureus SA957]	NC_022442.1	1533880	1534857	BA000033.2	1e-07	1529497	1529467	31
AATACACAACGCATTTGTAAACAGAAATTAC	17.889	84	98	1572513	4e-09	849	879	31	lukS-PV	Panton-Valentine leukocidin chain S precursor[Staphylococcus aureus subsp. aureus SA957]	NC_022442.1	1534859	1535797	BA000033.2	1e-07	1530450	1530420	31
AATACTCAAAGCTGCTGGAAACATTTATTCT	17.889	84	98	1572197	4e-09	225	255	31	lukF-PV	Panton-Valentine leukocidin chain F precursor[Staphylococcus aureus subsp. aureus SA957]	NC_022442.1	1533880	1534857	BA000033.2	1e-07	1530134	1530104	31
AATAGATACTCAATCTAAGGAAAAAAATCCT	17.889	84	98	1571483	4e-09	939	969	31	lukF-PV	Panton-Valentine leukocidin chain F precursor[Staphylococcus aureus subsp. aureus SA957]	NC_022442.1	1533880	1534857	BA000033.2	1e-07	1529420	1529390	31
AATAGATTCAGTAAATGTTAGTCAAACATTA	17.889	84	98	1572981	4e-09	381	411	31	lukS-PV	Panton-Valentine leukocidin chain S precursor[Staphylococcus aureus subsp. aureus SA957]	NC_022442.1	1534859	1535797	AY954956.1	1e-07	24469	24499	31
AATAGTCAAATCATCAGTTGTTACATCAATT	17.889	84	98	1572413	4e-09	9	39	31	lukF-PV	Panton-Valentine leukocidin chain F precursor[Staphylococcus aureus subsp. aureus SA957]	NC_022442.1	1533880	1534857	BA000033.2	1e-07	1530350	1530320	31
AATAGTGTCTTTTGGATTTGGCTTTGTATAG	17.889	84	98	1572164	4e-09	288	258	31	lukF-PV	Panton-Valentine leukocidin chain F precursor[Staphylococcus aureus subsp. aureus SA957]	NC_022442.1	1533880	1534857	BA000033.2	1e-07	1530071	1530101	31
AATAGTTATTTAGAAGGATCTAGAATACACA	17.889	84	98	1572536	4e-09	826	856	31	lukS-PV	Panton-Valentine leukocidin chain S precursor[Staphylococcus aureus subsp. aureus SA957]	NC_022442.1	1534859	1535797	BA000033.2	1e-07	1530473	1530443	31
AATATAGAAAGAAAGTGTTTGTAAATTTTAA	17.889	84	98	1571412	0.017	47	69	23	SAZ172_0994	GNAT family acetyltransferase YjcF[Staphylococcus aureus subsp. aureus Z172]	NC_022604.1	1077258	1077692	BA000033.2	1e-07	1529319	1529349	31
AATATCACAAAATGCCAGTGTTATCCAGAGG	17.889	84	98	1571724	4e-09	698	728	31	lukF-PV	Panton-Valentine leukocidin chain F precursor[Staphylococcus aureus subsp. aureus SA957]	NC_022442.1	1533880	1534857	BA000033.2	1e-07	1529661	1529631	31
AATATGAAGTGAACTGGAAAACTCATGAAAT	17.889	84	98	1572475	4e-09	887	917	31	lukS-PV	Panton-Valentine leukocidin chain S precursor[Staphylococcus aureus subsp. aureus SA957]	NC_022442.1	1534859	1535797	BA000033.2	1e-07	1530412	1530382	31
AATATGGATGTTACTCATGCTACTAGAAGAA	17.889	84	98	1572581	4e-09	781	811	31	lukS-PV	Panton-Valentine leukocidin chain S precursor[Staphylococcus aureus subsp. aureus SA957]	NC_022442.1	1534859	1535797	BA000033.2	1e-07	1530518	1530488	31
AATATGTTAAAATTTACAAACACTTTCTTTC	17.889	84	98	1571418	0.22	69	53	17	SAZ172_0994	GNAT family acetyltransferase YjcF[Staphylococcus aureus subsp. aureus Z172]	NC_022604.1	1077258	1077692	BA000033.2	1e-07	1529355	1529325	31
AATATTCAGTTTGATTTTGTTAAAGATAAAA	17.889	84	98	1573190	4e-09	172	202	31	lukS-PV	Panton-Valentine leukocidin chain S precursor[Staphylococcus aureus subsp. aureus SA957]	NC_022442.1	1534859	1535797	AY954956.1	1e-07	24260	24290	31
AATATTCTCAATATTGTTATCAGCTTTAGAT	17.889	84	98	1573287	4e-09	105	75	31	lukS-PV	Panton-Valentine leukocidin chain S precursor[Staphylococcus aureus subsp. aureus SA957]	NC_022442.1	1534859	1535797	AY954956.1	1e-07	24193	24163	31
AATATTGAGAATATTGGTGATGGCGCTGAGG	17.889	84	98	1573271	4e-09	91	121	31	lukS-PV	Panton-Valentine leukocidin chain S precursor[Staphylococcus aureus subsp. aureus SA957]	NC_022442.1	1534859	1535797	AY954956.1	1e-07	24179	24209	31
AATATTGGTGATGGCGCTGAGGTAGTCAAAA	17.889	84	98	1573262	4e-09	100	130	31	lukS-PV	Panton-Valentine leukocidin chain S precursor[Staphylococcus aureus subsp. aureus SA957]	NC_022442.1	1534859	1535797	AY954956.1	1e-07	24188	24218	31
AATATTGTATTGGAAAGGCCACCTCATTGCT	17.889	84	98	1573068	4e-09	324	294	31	lukS-PV	Panton-Valentine leukocidin chain S precursor[Staphylococcus aureus subsp. aureus SA957]	NC_022442.1	1534859	1535797	AY954956.1	1e-07	24412	24382	31
AATATTGTTATCAGCTTTAGATTCATGAAAC	17.889	84	98	1573296	4e-09	96	66	31	lukS-PV	Panton-Valentine leukocidin chain S precursor[Staphylococcus aureus subsp. aureus SA957]	NC_022442.1	1534859	1535797	AY954956.1	1e-07	24184	24154	31
AATCAAAAAATCTTAAATATGTTAAAATTTA	17.889	84	98	1571433	0.22	1381	1402	24	SLUG_15830	putative cardiolipin synthase[Staphylococcus lugdunensis N920143]	NC_017353.1	1657515	1658996	BA000033.2	1e-07	1529370	1529340	31
AATCAAAATGAAGAATTTCAAGTACAACAAA	17.889	84	98	1572043	4e-09	379	409	31	lukF-PV	Panton-Valentine leukocidin chain F precursor[Staphylococcus aureus subsp. aureus SA957]	NC_022442.1	1533880	1534857	BA000033.2	1e-07	1529980	1529950	31
AATCAAACTGAATATTTTGTGTGACCCCCCA	17.889	84	98	1573205	4e-09	187	157	31	lukS-PV	Panton-Valentine leukocidin chain S precursor[Staphylococcus aureus subsp. aureus SA957]	NC_022442.1	1534859	1535797	AY954956.1	1e-07	24275	24245	31
AATCAAAGCGTCTTTGTTATACTTTTTATCT	17.889	84	98	1573167	4e-09	225	195	31	lukS-PV	Panton-Valentine leukocidin chain S precursor[Staphylococcus aureus subsp. aureus SA957]	NC_022442.1	1534859	1535797	AY954956.1	1e-07	24313	24283	31
AATCAACAAAACTATATCAGTGAAGTAGAAC	17.889	84	98	1572866	4e-09	496	526	31	lukS-PV	Panton-Valentine leukocidin chain S precursor[Staphylococcus aureus subsp. aureus SA957]	NC_022442.1	1534859	1535797	BA000033.2	1e-07	1530803	1530773	31
AATCAACTTCACTGGATAGGTAATAATTATA	17.889	84	98	1571581	4e-09	841	871	31	lukF-PV	Panton-Valentine leukocidin chain F precursor[Staphylococcus aureus subsp. aureus SA957]	NC_022442.1	1533880	1534857	BA000033.2	1e-07	1529518	1529488	31
AATCACTCCTATTGCTACTTCGTTTCATGAA	17.889	84	98	1573317	4e-09	45	75	31	lukS-PV	Panton-Valentine leukocidin chain S precursor[Staphylococcus aureus subsp. aureus SA957]	NC_022442.1	1534859	1535797	AY954956.1	1e-07	24133	24163	31
AATCATACAGTTAAATTAATAGATACTCAAT	17.889	84	98	1571500	4e-09	922	952	31	lukF-PV	Panton-Valentine leukocidin chain F precursor[Staphylococcus aureus subsp. aureus SA957]	NC_022442.1	1533880	1534857	BA000033.2	1e-07	1529437	1529407	31
AATCATCAGTTGTTACATCAATTGCATTGCT	17.889	84	98	1572405	4e-09	17	47	31	lukF-PV	Panton-Valentine leukocidin chain F precursor[Staphylococcus aureus subsp. aureus SA957]	NC_022442.1	1533880	1534857	BA000033.2	1e-07	1530342	1530312	31
AATCCAGAATTTATTGGTGTCCTATCTCGAA	17.889	84	98	1571686	4e-09	736	766	31	lukF-PV	Panton-Valentine leukocidin chain F precursor[Staphylococcus aureus subsp. aureus SA957]	NC_022442.1	1533880	1534857	BA000033.2	1e-07	1529623	1529593	31
AATCCTATGAGCTAAACAGATAGATAATCAA	17.889	84	98	1571458	0.0001	965	987	23	SAAG_02096	panton-Valentine leukocidin chain F protein[Staphylococcus aureus subsp. aureus 55/2053]	NC_022113.1	1460399	1461385	BA000033.2	1e-07	1529395	1529365	31
AATCCTTCATTTATTGCAACTGTTTCTCATG	17.889	84	98	1572659	4e-09	703	733	31	lukS-PV	Panton-Valentine leukocidin chain S precursor[Staphylococcus aureus subsp. aureus SA957]	NC_022442.1	1534859	1535797	BA000033.2	1e-07	1530596	1530566	31
AATCTAAAGCTGATAACAATATTGAGAATAT	17.889	84	98	1573288	4e-09	74	104	31	lukS-PV	Panton-Valentine leukocidin chain S precursor[Staphylococcus aureus subsp. aureus SA957]	NC_022442.1	1534859	1535797	AY954956.1	1e-07	24162	24192	31
AATCTAAGGAAAAAAATCCTATGAGCTAAAC	17.889	84	98	1571472	5e-08	950	978	29	lukF-PV	Panton-Valentine leukocidin chain F precursor[Staphylococcus aureus subsp. aureus SA957]	NC_022442.1	1533880	1534857	BA000033.2	1e-07	1529409	1529379	31
AATCTACAACGTTTACTGAGTCATTAGAATC	17.889	84	98	1572085	4e-09	367	337	31	lukF-PV	Panton-Valentine leukocidin chain F precursor[Staphylococcus aureus subsp. aureus SA957]	NC_022442.1	1533880	1534857	BA000033.2	1e-07	1529992	1530022	31
AATCTGAATTAATTGAAATGTTGTACTTAGA	17.889	84	98	1572112	4e-09	340	310	31	lukF-PV	Panton-Valentine leukocidin chain F precursor[Staphylococcus aureus subsp. aureus SA957]	NC_022442.1	1533880	1534857	BA000033.2	1e-07	1530019	1530049	31
AATCTGAGAAATTTTTAACTTATCGGAATCT	17.889	84	98	1572275	4e-09	177	147	31	lukF-PV	Panton-Valentine leukocidin chain F precursor[Staphylococcus aureus subsp. aureus SA957]	NC_022442.1	1533880	1534857	BA000033.2	1e-07	1530182	1530212	31
AATCTTAAATATGTTAAAATTTACAAACACT	17.889	84	98	1571425	0.79	2029	2051	23	SPSINT_0503	primase, superantigen-encoding pathogenicity islands SaPI[Staphylococcus pseudintermedius HKU10-03]	NC_014925.1	548920	551289	BA000033.2	1e-07	1529362	1529332	31
AATCTTTTTCAGAGACAATTAACTATAAACA	17.889	84	98	1571943	4e-09	479	509	31	lukF-PV	Panton-Valentine leukocidin chain F precursor[Staphylococcus aureus subsp. aureus SA957]	NC_022442.1	1533880	1534857	BA000033.2	1e-07	1529880	1529850	31
AATGAAATGTTTTTAGGCTCAAGACAAAGCA	17.889	84	98	1571782	4e-09	640	670	31	lukF-PV	Panton-Valentine leukocidin chain F precursor[Staphylococcus aureus subsp. aureus SA957]	NC_022442.1	1533880	1534857	BA000033.2	1e-07	1529719	1529689	31
AATGAACCATTACCTCCTGTTGATGGACCAC	17.889	84	98	1572922	4e-09	470	440	31	lukS-PV	Panton-Valentine leukocidin chain S precursor[Staphylococcus aureus subsp. aureus SA957]	NC_022442.1	1534859	1535797	AY954956.1	1e-07	24558	24528	31
AATGAAGAATTTCAAGTACAACAAACGGTAG	17.889	84	98	1572037	4e-09	385	415	31	lukF-PV	Panton-Valentine leukocidin chain F precursor[Staphylococcus aureus subsp. aureus SA957]	NC_022442.1	1533880	1534857	BA000033.2	1e-07	1529974	1529944	31
AATGAAGGATTGAAACCACTGTGTACTAATG	17.889	84	98	1572679	4e-09	713	683	31	lukS-PV	Panton-Valentine leukocidin chain S precursor[Staphylococcus aureus subsp. aureus SA957]	NC_022442.1	1534859	1535797	BA000033.2	1e-07	1530586	1530616	31
AATGAATTAGCTTTTATTCCCCATTGAACAC	17.889	84	98	1572820	4e-09	572	542	31	lukS-PV	Panton-Valentine leukocidin chain S precursor[Staphylococcus aureus subsp. aureus SA957]	NC_022442.1	1534859	1535797	BA000033.2	1e-07	1530727	1530757	31
AATGACTCAGTAAACGTTGTAGATTATGCAC	17.889	84	98	1572079	4e-09	343	373	31	lukF-PV	Panton-Valentine leukocidin chain F precursor[Staphylococcus aureus subsp. aureus SA957]	NC_022442.1	1533880	1534857	BA000033.2	1e-07	1530016	1529986	31
AATGAGGTGGCCTTTCCAATACAATATTGGT	17.889	84	98	1573065	4e-09	297	327	31	lukS-PV	Panton-Valentine leukocidin chain S precursor[Staphylococcus aureus subsp. aureus SA957]	NC_022442.1	1534859	1535797	AY954956.1	1e-07	24385	24415	31
AATGATAACTATCTCTGCCATATGGTCCCCA	17.889	84	98	1571824	4e-09	628	598	31	lukF-PV	Panton-Valentine leukocidin chain F precursor[Staphylococcus aureus subsp. aureus SA957]	NC_022442.1	1533880	1534857	BA000033.2	1e-07	1529731	1529761	31
AATGATGTGATAAATGAATTAGCTTTTATTC	17.889	84	98	1572808	4e-09	584	554	31	lukS-PV	Panton-Valentine leukocidin chain S precursor[Staphylococcus aureus subsp. aureus SA957]	NC_022442.1	1534859	1535797	BA000033.2	1e-07	1530715	1530745	31
AATGCAAGGTTTTATCAATTCAAAGACTACT	17.889	84	98	1573131	4e-09	231	261	31	lukS-PV	Panton-Valentine leukocidin chain S precursor[Staphylococcus aureus subsp. aureus SA957]	NC_022442.1	1534859	1535797	AY954956.1	1e-07	24319	24349	31
AATGCAATTGATGTAACAACTGATGATTTGA	17.889	84	98	1572408	4e-09	44	14	31	lukF-PV	Panton-Valentine leukocidin chain F precursor[Staphylococcus aureus subsp. aureus SA957]	NC_022442.1	1533880	1534857	BA000033.2	1e-07	1530315	1530345	31
AATGCCAGTGTTATCCAGAGGTAACTTCAAT	17.889	84	98	1571714	4e-09	708	738	31	lukF-PV	Panton-Valentine leukocidin chain F precursor[Staphylococcus aureus subsp. aureus SA957]	NC_022442.1	1533880	1534857	BA000033.2	1e-07	1529651	1529621	31
AATGCGTTGTGTATTCTAGATCCTTCTAAAT	17.889	84	98	1572529	4e-09	863	833	31	lukS-PV	Panton-Valentine leukocidin chain S precursor[Staphylococcus aureus subsp. aureus SA957]	NC_022442.1	1534859	1535797	BA000033.2	1e-07	1530436	1530466	31
AATGCTGGACAAAACTTCTTGGAATATCACA	17.889	84	98	1571746	4e-09	676	706	31	lukF-PV	Panton-Valentine leukocidin chain F precursor[Staphylococcus aureus subsp. aureus SA957]	NC_022442.1	1533880	1534857	BA000033.2	1e-07	1529683	1529653	31
AATGGATAGATATACAAACTTTTGGAATCAA	17.889	84	98	1571606	4e-09	816	846	31	lukF-PV	Panton-Valentine leukocidin chain F precursor[Staphylococcus aureus subsp. aureus SA957]	NC_022442.1	1533880	1534857	BA000033.2	1e-07	1529543	1529513	31
AATGGGGAATAAAAGCTAATTCATTTATCAC	17.889	84	98	1572814	4e-09	548	578	31	lukS-PV	Panton-Valentine leukocidin chain S precursor[Staphylococcus aureus subsp. aureus SA957]	NC_022442.1	1534859	1535797	BA000033.2	1e-07	1530751	1530721	31
AATGGTTCAAAATCTTTTTCAGAGACAATTA	17.889	84	98	1571953	4e-09	469	499	31	lukF-PV	Panton-Valentine leukocidin chain F precursor[Staphylococcus aureus subsp. aureus SA957]	NC_022442.1	1533880	1534857	BA000033.2	1e-07	1529890	1529860	31
AATGGTTCATTTAATTATTCAAAAACAATTA	17.889	84	98	1572902	4e-09	460	490	31	lukS-PV	Panton-Valentine leukocidin chain S precursor[Staphylococcus aureus subsp. aureus SA957]	NC_022442.1	1534859	1535797	AY954956.1	1e-07	24548	24578	31
AATGTATCTTTATCATAACTTTTATCTTTAA	17.889	84	98	1572228	4e-09	224	194	31	lukF-PV	Panton-Valentine leukocidin chain F precursor[Staphylococcus aureus subsp. aureus SA957]	NC_022442.1	1533880	1534857	BA000033.2	1e-07	1530135	1530165	31
AATGTTAGTCAAACATTAGGTTATAACATAG	17.889	84	98	1572968	4e-09	394	424	31	lukS-PV	Panton-Valentine leukocidin chain S precursor[Staphylococcus aureus subsp. aureus SA957]	NC_022442.1	1534859	1535797	AY954956.1	1e-07	24482	24512	31
AATGTTGTACTTAGAACCCCAATAAAATTGA	17.889	84	98	1572128	4e-09	324	294	31	lukF-PV	Panton-Valentine leukocidin chain F precursor[Staphylococcus aureus subsp. aureus SA957]	NC_022442.1	1533880	1534857	BA000033.2	1e-07	1530035	1530065	31
AATGTTTCCAGCAGCTTTGAGTATTAATGTA	17.889	84	98	1572203	4e-09	249	219	31	lukF-PV	Panton-Valentine leukocidin chain F precursor[Staphylococcus aureus subsp. aureus SA957]	NC_022442.1	1533880	1534857	BA000033.2	1e-07	1530110	1530140	31
AATGTTTTTAGGCTCAAGACAAAGCAACTTA	17.889	84	98	1571777	4e-09	645	675	31	lukF-PV	Panton-Valentine leukocidin chain F precursor[Staphylococcus aureus subsp. aureus SA957]	NC_022442.1	1533880	1534857	BA000033.2	1e-07	1529714	1529684	31
AATTAAAAGTTAAAATCTGAGAAATTTTTAA	17.889	84	98	1572262	4e-09	190	160	31	lukF-PV	Panton-Valentine leukocidin chain F precursor[Staphylococcus aureus subsp. aureus SA957]	NC_022442.1	1533880	1534857	BA000033.2	1e-07	1530169	1530199	31
AATTAAAGTGAAAGGACATAATTGATATGAA	17.889	84	98	1572447	8e-06	915	939	25	lukS-PV	Panton-Valentine leukocidin chain S precursor[Staphylococcus aureus subsp. aureus SA957]	NC_022442.1	1534859	1535797	BA000033.2	1e-07	1530384	1530354	31
AATTAAATGAACCATTACCTCCTGTTGATGG	17.889	84	98	1572917	4e-09	475	445	31	lukS-PV	Panton-Valentine leukocidin chain S precursor[Staphylococcus aureus subsp. aureus SA957]	NC_022442.1	1534859	1535797	AY954956.1	1e-07	24563	24533	31
AATTAACTATAAACAAGAAAGCTATAGAACT	17.889	84	98	1571927	4e-09	495	525	31	lukF-PV	Panton-Valentine leukocidin chain F precursor[Staphylococcus aureus subsp. aureus SA957]	NC_022442.1	1533880	1534857	BA000033.2	1e-07	1529864	1529834	31
AATTAAGACGTGGTTACCCTAATATAGAAAG	17.889	84	98	1571392	2.8	174	188	15	MS7_0645	pyridine nucleotide-disulfide oxidoreductase family protein[Staphylococcus aureus subsp. aureus 11819-97]	NC_017351.1	686824	687024	BA000033.2	1e-07	1529299	1529329	31
AATTAATAGATACTCAATCTAAGGAAAAAAA	17.889	84	98	1571487	4e-09	935	965	31	lukF-PV	Panton-Valentine leukocidin chain F precursor[Staphylococcus aureus subsp. aureus SA957]	NC_022442.1	1533880	1534857	BA000033.2	1e-07	1529424	1529394	31
AATTAATTCAGATTCTAATGACTCAGTAAAC	17.889	84	98	1572095	4e-09	327	357	31	lukF-PV	Panton-Valentine leukocidin chain F precursor[Staphylococcus aureus subsp. aureus SA957]	NC_022442.1	1533880	1534857	BA000033.2	1e-07	1530032	1530002	31
AATTAATTGAAATGTTGTACTTAGAACCCCA	17.889	84	98	1572118	4e-09	334	304	31	lukF-PV	Panton-Valentine leukocidin chain F precursor[Staphylococcus aureus subsp. aureus SA957]	NC_022442.1	1533880	1534857	BA000033.2	1e-07	1530025	1530055	31
AATTACAAAAACACAGATCATATAAAAGCAA	17.889	84	98	1573094	4e-09	268	298	31	lukS-PV	Panton-Valentine leukocidin chain S precursor[Staphylococcus aureus subsp. aureus SA957]	NC_022442.1	1534859	1535797	AY954956.1	1e-07	24356	24386	31
AATTACACAGTTAAATATGAAGTGAACTGGA	17.889	84	98	1572488	4e-09	874	904	31	lukS-PV	Panton-Valentine leukocidin chain S precursor[Staphylococcus aureus subsp. aureus SA957]	NC_022442.1	1534859	1535797	BA000033.2	1e-07	1530425	1530395	31
AATTACCACCTATGTTATAACCTAATGTTTG	17.889	84	98	1572959	4e-09	433	403	31	lukS-PV	Panton-Valentine leukocidin chain S precursor[Staphylococcus aureus subsp. aureus SA957]	NC_022442.1	1534859	1535797	AY954956.1	1e-07	24521	24491	31
AATTACCCCCATTAGTACACAGTGGTTTCAA	17.889	84	98	1572688	4e-09	674	704	31	lukS-PV	Panton-Valentine leukocidin chain S precursor[Staphylococcus aureus subsp. aureus SA957]	NC_022442.1	1534859	1535797	BA000033.2	1e-07	1530625	1530595	31
AATTACTGTTACTTATCAAAGAGAAATGGAT	17.889	84	98	1571630	4e-09	792	822	31	lukF-PV	Panton-Valentine leukocidin chain F precursor[Staphylococcus aureus subsp. aureus SA957]	NC_022442.1	1533880	1534857	BA000033.2	1e-07	1529567	1529537	31
AATTAGTTATAATCAACAAAACTATATCAGT	17.889	84	98	1572876	4e-09	486	516	31	lukS-PV	Panton-Valentine leukocidin chain S precursor[Staphylococcus aureus subsp. aureus SA957]	NC_022442.1	1534859	1535797	BA000033.2	1e-07	1530813	1530783	31
AATTAGTTCTTTTATCTAAGCTAGTTCTATA	17.889	84	98	1571905	4e-09	547	517	31	lukF-PV	Panton-Valentine leukocidin chain F precursor[Staphylococcus aureus subsp. aureus SA957]	NC_022442.1	1533880	1534857	BA000033.2	1e-07	1529812	1529842	31
AATTATAAAGATGAAAATAGAGCAACTCATA	17.889	84	98	1571557	4e-09	865	895	31	lukF-PV	Panton-Valentine leukocidin chain F precursor[Staphylococcus aureus subsp. aureus SA957]	NC_022442.1	1533880	1534857	BA000033.2	1e-07	1529494	1529464	31
AATTATGTCCTTTCACTTTAATTTCATGAGT	17.889	84	98	1572455	4e-09	937	907	31	lukS-PV	Panton-Valentine leukocidin chain S precursor[Staphylococcus aureus subsp. aureus SA957]	NC_022442.1	1534859	1535797	BA000033.2	1e-07	1530362	1530392	31
AATTATTACCTATCCAGTGAAGTTGATTCCA	17.889	84	98	1571584	4e-09	868	838	31	lukF-PV	Panton-Valentine leukocidin chain F precursor[Staphylococcus aureus subsp. aureus SA957]	NC_022442.1	1533880	1534857	BA000033.2	1e-07	1529491	1529521	31
AATTATTCAAAAACAATTAGTTATAATCAAC	17.889	84	98	1572890	4e-09	472	502	31	lukS-PV	Panton-Valentine leukocidin chain S precursor[Staphylococcus aureus subsp. aureus SA957]	NC_022442.1	1534859	1535797	BA000033.2	1e-07	1530827	1530797	31
AATTCAAAAAGTGTTCAATGGGGAATAAAAG	17.889	84	98	1572830	4e-09	532	562	31	lukS-PV	Panton-Valentine leukocidin chain S precursor[Staphylococcus aureus subsp. aureus SA957]	NC_022442.1	1534859	1535797	BA000033.2	1e-07	1530767	1530737	31
AATTCAAAGACTACTTATTACAATTACAAAA	17.889	84	98	1573115	4e-09	247	277	31	lukS-PV	Panton-Valentine leukocidin chain S precursor[Staphylococcus aureus subsp. aureus SA957]	NC_022442.1	1534859	1535797	AY954956.1	1e-07	24335	24365	31
AATTCACTTGTATCTCCTGAGCCTTTTTCAT	17.889	84	98	1572631	4e-09	761	731	31	lukS-PV	Panton-Valentine leukocidin chain S precursor[Staphylococcus aureus subsp. aureus SA957]	NC_022442.1	1534859	1535797	BA000033.2	1e-07	1530538	1530568	31
AATTCAGATTCTAATGACTCAGTAAACGTTG	17.889	84	98	1572091	4e-09	331	361	31	lukF-PV	Panton-Valentine leukocidin chain F precursor[Staphylococcus aureus subsp. aureus SA957]	NC_022442.1	1533880	1534857	BA000033.2	1e-07	1530028	1529998	31
AATTCATTTATCACATCATTAGGTAAAATGT	17.889	84	98	1572797	4e-09	565	595	31	lukS-PV	Panton-Valentine leukocidin chain S precursor[Staphylococcus aureus subsp. aureus SA957]	NC_022442.1	1534859	1535797	BA000033.2	1e-07	1530734	1530704	31
AATTCTGGATTGAAGTTACCTCTGGATAACA	17.889	84	98	1571706	4e-09	746	716	31	lukF-PV	Panton-Valentine leukocidin chain F precursor[Staphylococcus aureus subsp. aureus SA957]	NC_022442.1	1533880	1534857	BA000033.2	1e-07	1529613	1529643	31
AATTCTTCATTTTGATTTTTAGGTGCATAAT	17.889	84	98	1572057	4e-09	395	365	31	lukF-PV	Panton-Valentine leukocidin chain F precursor[Staphylococcus aureus subsp. aureus SA957]	NC_022442.1	1533880	1534857	BA000033.2	1e-07	1529964	1529994	31
AATTGAAATGTTGTACTTAGAACCCCAATAA	17.889	84	98	1572122	4e-09	330	300	31	lukF-PV	Panton-Valentine leukocidin chain F precursor[Staphylococcus aureus subsp. aureus SA957]	NC_022442.1	1533880	1534857	BA000033.2	1e-07	1530029	1530059	31
AATTGAGAACTAATAGTGTCTTTTGGATTTG	17.889	84	98	1572153	4e-09	299	269	31	lukF-PV	Panton-Valentine leukocidin chain F precursor[Staphylococcus aureus subsp. aureus SA957]	NC_022442.1	1533880	1534857	BA000033.2	1e-07	1530060	1530090	31
AATTGATAAAACCTTGCATTTTTAAAATCAA	17.889	84	98	1573142	4e-09	250	220	31	lukS-PV	Panton-Valentine leukocidin chain S precursor[Staphylococcus aureus subsp. aureus SA957]	NC_022442.1	1534859	1535797	AY954956.1	1e-07	24338	24308	31
AATTGATATGAAAAAAATAGTCAAATCATCA	17.889	84	98	1572428	3e-05	1	24	24	lukF-PV	Panton-Valentine leukocidin chain F precursor[Staphylococcus aureus subsp. aureus SA957]	NC_022442.1	1533880	1534857	BA000033.2	1e-07	1530365	1530335	31
AATTGTAATAAGTAGTCTTTGAATTGATAAA	17.889	84	98	1573121	4e-09	271	241	31	lukS-PV	Panton-Valentine leukocidin chain S precursor[Staphylococcus aureus subsp. aureus SA957]	NC_022442.1	1534859	1535797	AY954956.1	1e-07	24359	24329	31
AATTGTCTCTGAAAAAGATTTTGAACCATTA	17.889	84	98	1571954	4e-09	498	468	31	lukF-PV	Panton-Valentine leukocidin chain F precursor[Staphylococcus aureus subsp. aureus SA957]	NC_022442.1	1533880	1534857	BA000033.2	1e-07	1529861	1529891	31
AATTGTTTTTGAATAATTAAATGAACCATTA	17.889	84	98	1572903	4e-09	489	459	31	lukS-PV	Panton-Valentine leukocidin chain S precursor[Staphylococcus aureus subsp. aureus SA957]	NC_022442.1	1534859	1535797	AY954956.1	1e-07	24577	24547	31
AATTTAACTGTATGATTTTCCCAATCAACTT	17.889	84	98	1571514	4e-09	938	908	31	lukF-PV	Panton-Valentine leukocidin chain F precursor[Staphylococcus aureus subsp. aureus SA957]	NC_022442.1	1533880	1534857	BA000033.2	1e-07	1529421	1529451	31
AATTTACAAACACTTTCTTTCTATATTAGGG	17.889	84	98	1571408	0.017	69	47	23	SAZ172_0994	GNAT family acetyltransferase YjcF[Staphylococcus aureus subsp. aureus Z172]	NC_022604.1	1077258	1077692	BA000033.2	1e-07	1529345	1529315	31
AATTTATGAAGTTGATTGGGAAAATCATACA	17.889	84	98	1571522	4e-09	900	930	31	lukF-PV	Panton-Valentine leukocidin chain F precursor[Staphylococcus aureus subsp. aureus SA957]	NC_022442.1	1533880	1534857	BA000033.2	1e-07	1529459	1529429	31
AATTTATTGGTGTCCTATCTCGAAAACAAAA	17.889	84	98	1571679	4e-09	743	773	31	lukF-PV	Panton-Valentine leukocidin chain F precursor[Staphylococcus aureus subsp. aureus SA957]	NC_022442.1	1533880	1534857	BA000033.2	1e-07	1529616	1529586	31
AATTTATTTGTTGGATATAAACCATATAGTC	17.889	84	98	1572752	4e-09	610	640	31	lukS-PV	Panton-Valentine leukocidin chain S precursor[Staphylococcus aureus subsp. aureus SA957]	NC_022442.1	1534859	1535797	BA000033.2	1e-07	1530689	1530659	31
AATTTCAAAAAAATTGGTTGGGATGTTGAAG	17.889	84	98	1571878	4e-09	544	574	31	lukF-PV	Panton-Valentine leukocidin chain F precursor[Staphylococcus aureus subsp. aureus SA957]	NC_022442.1	1533880	1534857	BA000033.2	1e-07	1529815	1529785	31
AATTTCAAGTACAACAAACGGTAGGTTATTC	17.889	84	98	1572030	4e-09	392	422	31	lukF-PV	Panton-Valentine leukocidin chain F precursor[Staphylococcus aureus subsp. aureus SA957]	NC_022442.1	1533880	1534857	BA000033.2	1e-07	1529967	1529937	31
AATTTCATGAGTTTTCCAGTTCACTTCATAT	17.889	84	98	1572474	4e-09	918	888	31	lukS-PV	Panton-Valentine leukocidin chain S precursor[Staphylococcus aureus subsp. aureus SA957]	NC_022442.1	1534859	1535797	BA000033.2	1e-07	1530381	1530411	31
AATTTCTGTTTACAAATGCGTTGTGTATTCT	17.889	84	98	1572515	4e-09	877	847	31	lukS-PV	Panton-Valentine leukocidin chain S precursor[Staphylococcus aureus subsp. aureus SA957]	NC_022442.1	1534859	1535797	BA000033.2	1e-07	1530422	1530452	31
AATTTGAAATAACGTATGGCAGAAATATGGA	17.889	84	98	1572604	4e-09	758	788	31	lukS-PV	Panton-Valentine leukocidin chain S precursor[Staphylococcus aureus subsp. aureus SA957]	NC_022442.1	1534859	1535797	BA000033.2	1e-07	1530541	1530511	31
AATTTGGATCATGTCCAGACATTTTACCTAA	17.889	84	98	1572779	4e-09	613	583	31	lukS-PV	Panton-Valentine leukocidin chain S precursor[Staphylococcus aureus subsp. aureus SA957]	NC_022442.1	1534859	1535797	BA000033.2	1e-07	1530686	1530716	31
AATTTTAACATATTTAAGATTTTTTGATTAT	17.889	84	98	1571435	0.22	1402	1381	24	SLUG_15830	putative cardiolipin synthase[Staphylococcus lugdunensis N920143]	NC_017353.1	1657515	1658996	BA000033.2	1e-07	1529342	1529372	31
AATTTTAATAGTGGTCCATCAACAGGAGGTA	17.889	84	98	1572932	4e-09	430	460	31	lukS-PV	Panton-Valentine leukocidin chain S precursor[Staphylococcus aureus subsp. aureus SA957]	NC_022442.1	1534859	1535797	AY954956.1	1e-07	24518	24548	31
AATTTTATCATCAACCTTTTTCTCACTTACA	17.889	84	98	1572332	4e-09	120	90	31	lukF-PV	Panton-Valentine leukocidin chain F precursor[Staphylococcus aureus subsp. aureus SA957]	NC_022442.1	1533880	1534857	BA000033.2	1e-07	1530239	1530269	31
AATTTTATTAAAGATAAAAGTTATGATAAAG	17.889	84	98	1572235	4e-09	187	217	31	lukF-PV	Panton-Valentine leukocidin chain F precursor[Staphylococcus aureus subsp. aureus SA957]	NC_022442.1	1533880	1534857	BA000033.2	1e-07	1530172	1530142	31
AATTTTATTGGGGTTCTAAGTACAACATTTC	17.889	84	98	1572126	4e-09	296	326	31	lukF-PV	Panton-Valentine leukocidin chain F precursor[Staphylococcus aureus subsp. aureus SA957]	NC_022442.1	1533880	1534857	BA000033.2	1e-07	1530063	1530033	31
AATTTTTAACTTATCGGAATCTGATGTTGCA	17.889	84	98	1572284	4e-09	168	138	31	lukF-PV	Panton-Valentine leukocidin chain F precursor[Staphylococcus aureus subsp. aureus SA957]	NC_022442.1	1533880	1534857	BA000033.2	1e-07	1530191	1530221	31
AATTTTTTTGAAATTAGTTCTTTTATCTAAG	17.889	84	98	1571894	4e-09	558	528	31	lukF-PV	Panton-Valentine leukocidin chain F precursor[Staphylococcus aureus subsp. aureus SA957]	NC_022442.1	1533880	1534857	BA000033.2	1e-07	1529801	1529831	31
ACAAAAACACAGATCATATAAAAGCAATGAG	17.889	84	98	1573090	4e-09	272	302	31	lukS-PV	Panton-Valentine leukocidin chain S precursor[Staphylococcus aureus subsp. aureus SA957]	NC_022442.1	1534859	1535797	AY954956.1	1e-07	24360	24390	31
ACAAAACAACTGCAACATCAGATTCCGATAA	17.889	84	98	1572294	4e-09	128	158	31	lukF-PV	Panton-Valentine leukocidin chain F precursor[Staphylococcus aureus subsp. aureus SA957]	NC_022442.1	1533880	1534857	BA000033.2	1e-07	1530231	1530201	31
ACAAAACTTCTTGGAATATCACAAAATGCCA	17.889	84	98	1571738	4e-09	684	714	31	lukF-PV	Panton-Valentine leukocidin chain F precursor[Staphylococcus aureus subsp. aureus SA957]	NC_022442.1	1533880	1534857	BA000033.2	1e-07	1529675	1529645	31
ACAAAATAGTCTCTCGGATTTTGACTATATG	17.889	84	98	1572730	4e-09	662	632	31	lukS-PV	Panton-Valentine leukocidin chain S precursor[Staphylococcus aureus subsp. aureus SA957]	NC_022442.1	1534859	1535797	BA000033.2	1e-07	1530637	1530667	31
ACAAAATATTCAGTTTGATTTTGTTAAAGAT	17.889	84	98	1573194	4e-09	168	198	31	lukS-PV	Panton-Valentine leukocidin chain S precursor[Staphylococcus aureus subsp. aureus SA957]	NC_022442.1	1534859	1535797	AY954956.1	1e-07	24256	24286	31
ACAAAATCAAACTGAATATTTTGTGTGACCC	17.889	84	98	1573201	4e-09	191	161	31	lukS-PV	Panton-Valentine leukocidin chain S precursor[Staphylococcus aureus subsp. aureus SA957]	NC_022442.1	1534859	1535797	AY954956.1	1e-07	24279	24249	31
ACAAACACTTTCTTTCTATATTAGGGTAACC	17.889	84	98	1571403	0.061	68	47	22	SAZ172_0994	GNAT family acetyltransferase YjcF[Staphylococcus aureus subsp. aureus Z172]	NC_022604.1	1077258	1077692	BA000033.2	1e-07	1529340	1529310	31
ACAAACGGTAGGTTATTCTTATGGTGGAGAT	17.889	84	98	1572017	4e-09	405	435	31	lukF-PV	Panton-Valentine leukocidin chain F precursor[Staphylococcus aureus subsp. aureus SA957]	NC_022442.1	1533880	1534857	BA000033.2	1e-07	1529954	1529924	31
ACAAACTTTTGGAATCAACTTCACTGGATAG	17.889	84	98	1571593	4e-09	829	859	31	lukF-PV	Panton-Valentine leukocidin chain F precursor[Staphylococcus aureus subsp. aureus SA957]	NC_022442.1	1533880	1534857	BA000033.2	1e-07	1529530	1529500	31
ACAAAGACGCTTTGATTTTAAAAATGCAAGG	17.889	84	98	1573153	4e-09	209	239	31	lukS-PV	Panton-Valentine leukocidin chain S precursor[Staphylococcus aureus subsp. aureus SA957]	NC_022442.1	1534859	1535797	AY954956.1	1e-07	24297	24327	31
ACAAAGCAACTTAAATGCTGGACAAAACTTC	17.889	84	98	1571759	4e-09	663	693	31	lukF-PV	Panton-Valentine leukocidin chain F precursor[Staphylococcus aureus subsp. aureus SA957]	NC_022442.1	1533880	1534857	BA000033.2	1e-07	1529696	1529666	31
ACAAATGCGTTGTGTATTCTAGATCCTTCTA	17.889	84	98	1572526	4e-09	866	836	31	lukS-PV	Panton-Valentine leukocidin chain S precursor[Staphylococcus aureus subsp. aureus SA957]	NC_022442.1	1534859	1535797	BA000033.2	1e-07	1530433	1530463	31
ACAACAAACGGTAGGTTATTCTTATGGTGGA	17.889	84	98	1572020	4e-09	402	432	31	lukF-PV	Panton-Valentine leukocidin chain F precursor[Staphylococcus aureus subsp. aureus SA957]	NC_022442.1	1533880	1534857	BA000033.2	1e-07	1529957	1529927	31
ACAACACACTATGGCAATAGTTATTTAGAAG	17.889	84	98	1572551	4e-09	811	841	31	lukS-PV	Panton-Valentine leukocidin chain S precursor[Staphylococcus aureus subsp. aureus SA957]	NC_022442.1	1534859	1535797	BA000033.2	1e-07	1530488	1530458	31
ACAACATTTCAATTAATTCAGATTCTAATGA	17.889	84	98	1572105	4e-09	317	347	31	lukF-PV	Panton-Valentine leukocidin chain F precursor[Staphylococcus aureus subsp. aureus SA957]	NC_022442.1	1533880	1534857	BA000033.2	1e-07	1530042	1530012	31
ACAACGCATTTGTAAACAGAAATTACACAGT	17.889	84	98	1572508	4e-09	854	884	31	lukS-PV	Panton-Valentine leukocidin chain S precursor[Staphylococcus aureus subsp. aureus SA957]	NC_022442.1	1534859	1535797	BA000033.2	1e-07	1530445	1530415	31
ACAACGTTTACTGAGTCATTAGAATCTGAAT	17.889	84	98	1572090	4e-09	362	332	31	lukF-PV	Panton-Valentine leukocidin chain F precursor[Staphylococcus aureus subsp. aureus SA957]	NC_022442.1	1533880	1534857	BA000033.2	1e-07	1529997	1530027	31
ACAACTGATGATTTGACTATTTTTTTCATAT	17.889	84	98	1572423	5e-08	29	1	29	lukF-PV	Panton-Valentine leukocidin chain F precursor[Staphylococcus aureus subsp. aureus SA957]	NC_022442.1	1533880	1534857	BA000033.2	1e-07	1530330	1530360	31
ACAACTGCAACATCAGATTCCGATAAGTTAA	17.889	84	98	1572289	4e-09	133	163	31	lukF-PV	Panton-Valentine leukocidin chain F precursor[Staphylococcus aureus subsp. aureus SA957]	NC_022442.1	1533880	1534857	BA000033.2	1e-07	1530226	1530196	31
ACAAGAAAGCTATAGAACTAGCTTAGATAAA	17.889	84	98	1571915	4e-09	507	537	31	lukF-PV	Panton-Valentine leukocidin chain F precursor[Staphylococcus aureus subsp. aureus SA957]	NC_022442.1	1533880	1534857	BA000033.2	1e-07	1529852	1529822	31
ACAAGTGAATTTGAAATAACGTATGGCAGAA	17.889	84	98	1572611	4e-09	751	781	31	lukS-PV	Panton-Valentine leukocidin chain S precursor[Staphylococcus aureus subsp. aureus SA957]	NC_022442.1	1534859	1535797	BA000033.2	1e-07	1530548	1530518	31
ACAATATTGAGAATATTGGTGATGGCGCTGA	17.889	84	98	1573273	4e-09	89	119	31	lukS-PV	Panton-Valentine leukocidin chain S precursor[Staphylococcus aureus subsp. aureus SA957]	NC_022442.1	1534859	1535797	AY954956.1	1e-07	24177	24207	31
ACAATGAATTACCCCCATTAGTACACAGTGG	17.889	84	98	1572694	4e-09	668	698	31	lukS-PV	Panton-Valentine leukocidin chain S precursor[Staphylococcus aureus subsp. aureus SA957]	NC_022442.1	1534859	1535797	BA000033.2	1e-07	1530631	1530601	31
ACAATTAACTATAAACAAGAAAGCTATAGAA	17.889	84	98	1571929	4e-09	493	523	31	lukF-PV	Panton-Valentine leukocidin chain F precursor[Staphylococcus aureus subsp. aureus SA957]	NC_022442.1	1533880	1534857	BA000033.2	1e-07	1529866	1529836	31
ACAATTACAAAAACACAGATCATATAAAAGC	17.889	84	98	1573096	4e-09	266	296	31	lukS-PV	Panton-Valentine leukocidin chain S precursor[Staphylococcus aureus subsp. aureus SA957]	NC_022442.1	1534859	1535797	AY954956.1	1e-07	24354	24384	31
ACAATTAGTTATAATCAACAAAACTATATCA	17.889	84	98	1572878	4e-09	484	514	31	lukS-PV	Panton-Valentine leukocidin chain S precursor[Staphylococcus aureus subsp. aureus SA957]	NC_022442.1	1534859	1535797	BA000033.2	1e-07	1530815	1530785	31
ACACAAAATATTCAGTTTGATTTTGTTAAAG	17.889	84	98	1573196	4e-09	166	196	31	lukS-PV	Panton-Valentine leukocidin chain S precursor[Staphylococcus aureus subsp. aureus SA957]	NC_022442.1	1534859	1535797	AY954956.1	1e-07	24254	24284	31
ACACAACGCATTTGTAAACAGAAATTACACA	17.889	84	98	1572510	4e-09	852	882	31	lukS-PV	Panton-Valentine leukocidin chain S precursor[Staphylococcus aureus subsp. aureus SA957]	NC_022442.1	1534859	1535797	BA000033.2	1e-07	1530447	1530417	31
ACACACTATGGCAATAGTTATTTAGAAGGAT	17.889	84	98	1572548	4e-09	814	844	31	lukS-PV	Panton-Valentine leukocidin chain S precursor[Staphylococcus aureus subsp. aureus SA957]	NC_022442.1	1534859	1535797	BA000033.2	1e-07	1530485	1530455	31
ACACAGATCATATAAAAGCAATGAGGTGGCC	17.889	84	98	1573084	4e-09	278	308	31	lukS-PV	Panton-Valentine leukocidin chain S precursor[Staphylococcus aureus subsp. aureus SA957]	NC_022442.1	1534859	1535797	AY954956.1	1e-07	24366	24396	31
ACACAGTGGTTTCAATCCTTCATTTATTGCA	17.889	84	98	1572672	4e-09	690	720	31	lukS-PV	Panton-Valentine leukocidin chain S precursor[Staphylococcus aureus subsp. aureus SA957]	NC_022442.1	1534859	1535797	BA000033.2	1e-07	1530609	1530579	31
ACACAGTTAAATATGAAGTGAACTGGAAAAC	17.889	84	98	1572484	4e-09	878	908	31	lukS-PV	Panton-Valentine leukocidin chain S precursor[Staphylococcus aureus subsp. aureus SA957]	NC_022442.1	1534859	1535797	BA000033.2	1e-07	1530421	1530391	31
ACACCAATAAATTCTGGATTGAAGTTACCTC	17.889	84	98	1571697	4e-09	755	725	31	lukF-PV	Panton-Valentine leukocidin chain F precursor[Staphylococcus aureus subsp. aureus SA957]	NC_022442.1	1533880	1534857	BA000033.2	1e-07	1529604	1529634	31
ACACCTGTAAGTGAGAAAAAGGTTGATGATA	17.889	84	98	1572337	4e-09	85	115	31	lukF-PV	Panton-Valentine leukocidin chain F precursor[Staphylococcus aureus subsp. aureus SA957]	NC_022442.1	1533880	1534857	BA000033.2	1e-07	1530274	1530244	31
ACACTATGGCAATAGTTATTTAGAAGGATCT	17.889	84	98	1572546	4e-09	816	846	31	lukS-PV	Panton-Valentine leukocidin chain S precursor[Staphylococcus aureus subsp. aureus SA957]	NC_022442.1	1534859	1535797	BA000033.2	1e-07	1530483	1530453	31
ACACTATTAGTTCTCAATTTTATTGGGGTTC	17.889	84	98	1572141	4e-09	281	311	31	lukF-PV	Panton-Valentine leukocidin chain F precursor[Staphylococcus aureus subsp. aureus SA957]	NC_022442.1	1533880	1534857	BA000033.2	1e-07	1530078	1530048	31
ACACTTTCTTTCTATATTAGGGTAACCACGT	17.889	84	98	1571399	NA	NA	NA	NA	NA	NA	NA	NA	NA	BA000033.2	1e-07	1529336	1529306	31
ACAGAAATTACACAGTTAAATATGAAGTGAA	17.889	84	98	1572493	4e-09	869	899	31	lukS-PV	Panton-Valentine leukocidin chain S precursor[Staphylococcus aureus subsp. aureus SA957]	NC_022442.1	1534859	1535797	BA000033.2	1e-07	1530430	1530400	31
ACAGATAGATAATCAAAAAATCTTAAATATG	17.889	84	98	1571443	0.79	126	108	20	qoxA	quinol oxidase subunit II[Staphylococcus pseudintermedius ED99]	NC_017568.1	1773635	1774735	BA000033.2	1e-07	1529380	1529350	31
ACAGGAGGTAATGGTTCATTTAATTATTCAA	17.889	84	98	1572911	4e-09	451	481	31	lukS-PV	Panton-Valentine leukocidin chain S precursor[Staphylococcus aureus subsp. aureus SA957]	NC_022442.1	1534859	1535797	AY954956.1	1e-07	24539	24569	31
ACAGTGGTTTCAATCCTTCATTTATTGCAAC	17.889	84	98	1572670	4e-09	692	722	31	lukS-PV	Panton-Valentine leukocidin chain S precursor[Staphylococcus aureus subsp. aureus SA957]	NC_022442.1	1534859	1535797	BA000033.2	1e-07	1530607	1530577	31
ACAGTTAAATATGAAGTGAACTGGAAAACTC	17.889	84	98	1572482	4e-09	880	910	31	lukS-PV	Panton-Valentine leukocidin chain S precursor[Staphylococcus aureus subsp. aureus SA957]	NC_022442.1	1534859	1535797	BA000033.2	1e-07	1530419	1530389	31
ACAGTTAAATTAATAGATACTCAATCTAAGG	17.889	84	98	1571494	4e-09	928	958	31	lukF-PV	Panton-Valentine leukocidin chain F precursor[Staphylococcus aureus subsp. aureus SA957]	NC_022442.1	1533880	1534857	BA000033.2	1e-07	1529431	1529401	31
ACAGTTGCAATAAATGAAGGATTGAAACCAC	17.889	84	98	1572667	4e-09	725	695	31	lukS-PV	Panton-Valentine leukocidin chain S precursor[Staphylococcus aureus subsp. aureus SA957]	NC_022442.1	1534859	1535797	BA000033.2	1e-07	1530574	1530604	31
ACATAATTGATATGAAAAAAATAGTCAAATC	17.889	84	98	1572432	0.005	1	20	20	lukF-PV	Panton-Valentine leukocidin chain F precursor[Staphylococcus aureus subsp. aureus SA957]	NC_022442.1	1533880	1534857	BA000033.2	1e-07	1530369	1530339	31
ACATAGGTGGTAATTTTAATAGTGGTCCATC	17.889	84	98	1572943	4e-09	419	449	31	lukS-PV	Panton-Valentine leukocidin chain S precursor[Staphylococcus aureus subsp. aureus SA957]	NC_022442.1	1534859	1535797	AY954956.1	1e-07	24507	24537	31
ACATATTTAAGATTTTTTGATTATCTATCTG	17.889	84	98	1571442	0.79	108	126	20	qoxA	quinol oxidase subunit II[Staphylococcus pseudintermedius ED99]	NC_017568.1	1773635	1774735	BA000033.2	1e-07	1529349	1529379	31
ACATCAATTGCATTGCTTTTGCTATCCAATA	17.889	84	98	1572391	4e-09	31	61	31	lukF-PV	Panton-Valentine leukocidin chain F precursor[Staphylococcus aureus subsp. aureus SA957]	NC_022442.1	1533880	1534857	BA000033.2	1e-07	1530328	1530298	31
ACATCAGATTCCGATAAGTTAAAAATTTCTC	17.889	84	98	1572280	4e-09	142	172	31	lukF-PV	Panton-Valentine leukocidin chain F precursor[Staphylococcus aureus subsp. aureus SA957]	NC_022442.1	1533880	1534857	BA000033.2	1e-07	1530217	1530187	31
ACATCATTAGGTAAAATGTCTGGACATGATC	17.889	84	98	1572785	4e-09	577	607	31	lukS-PV	Panton-Valentine leukocidin chain S precursor[Staphylococcus aureus subsp. aureus SA957]	NC_022442.1	1534859	1535797	BA000033.2	1e-07	1530722	1530692	31
ACATCCATATTTCTGCCATACGTTATTTCAA	17.889	84	98	1572601	4e-09	791	761	31	lukS-PV	Panton-Valentine leukocidin chain S precursor[Staphylococcus aureus subsp. aureus SA957]	NC_022442.1	1534859	1535797	BA000033.2	1e-07	1530508	1530538	31
ACATCCCAACCAATTTTTTTGAAATTAGTTC	17.889	84	98	1571883	4e-09	569	539	31	lukF-PV	Panton-Valentine leukocidin chain F precursor[Staphylococcus aureus subsp. aureus SA957]	NC_022442.1	1533880	1534857	BA000033.2	1e-07	1529790	1529820	31
ACATGATCCAAATTTATTTGTTGGATATAAA	17.889	84	98	1572762	4e-09	600	630	31	lukS-PV	Panton-Valentine leukocidin chain S precursor[Staphylococcus aureus subsp. aureus SA957]	NC_022442.1	1534859	1535797	BA000033.2	1e-07	1530699	1530669	31
ACATTAGGTTATAACATAGGTGGTAATTTTA	17.889	84	98	1572956	4e-09	406	436	31	lukS-PV	Panton-Valentine leukocidin chain S precursor[Staphylococcus aureus subsp. aureus SA957]	NC_022442.1	1534859	1535797	AY954956.1	1e-07	24494	24524	31
ACATTTACTGAATCTATTTTATTTTTAGGTA	17.889	84	98	1572994	4e-09	398	368	31	lukS-PV	Panton-Valentine leukocidin chain S precursor[Staphylococcus aureus subsp. aureus SA957]	NC_022442.1	1534859	1535797	AY954956.1	1e-07	24486	24456	31
ACATTTATTCTGGCTATACAAAGCCAAATCC	17.889	84	98	1572177	4e-09	245	275	31	lukF-PV	Panton-Valentine leukocidin chain F precursor[Staphylococcus aureus subsp. aureus SA957]	NC_022442.1	1533880	1534857	BA000033.2	1e-07	1530114	1530084	31
ACATTTCAATTAATTCAGATTCTAATGACTC	17.889	84	98	1572102	4e-09	320	350	31	lukF-PV	Panton-Valentine leukocidin chain F precursor[Staphylococcus aureus subsp. aureus SA957]	NC_022442.1	1533880	1534857	BA000033.2	1e-07	1530039	1530009	31
ACATTTCATTACCATAAGTTGAATGATAACT	17.889	84	98	1571803	4e-09	649	619	31	lukF-PV	Panton-Valentine leukocidin chain F precursor[Staphylococcus aureus subsp. aureus SA957]	NC_022442.1	1533880	1534857	BA000033.2	1e-07	1529710	1529740	31
ACCAATAAATTCTGGATTGAAGTTACCTCTG	17.889	84	98	1571699	4e-09	753	723	31	lukF-PV	Panton-Valentine leukocidin chain F precursor[Staphylococcus aureus subsp. aureus SA957]	NC_022442.1	1533880	1534857	BA000033.2	1e-07	1529606	1529636	31
ACCAATATTCTCAATATTGTTATCAGCTTTA	17.889	84	98	1573284	4e-09	108	78	31	lukS-PV	Panton-Valentine leukocidin chain S precursor[Staphylococcus aureus subsp. aureus SA957]	NC_022442.1	1534859	1535797	AY954956.1	1e-07	24196	24166	31
ACCAATTTTTTTGAAATTAGTTCTTTTATCT	17.889	84	98	1571891	4e-09	561	531	31	lukF-PV	Panton-Valentine leukocidin chain F precursor[Staphylococcus aureus subsp. aureus SA957]	NC_022442.1	1533880	1534857	BA000033.2	1e-07	1529798	1529828	31
ACCACCTATGTTATAACCTAATGTTTGACTA	17.889	84	98	1572963	4e-09	429	399	31	lukS-PV	Panton-Valentine leukocidin chain S precursor[Staphylococcus aureus subsp. aureus SA957]	NC_022442.1	1534859	1535797	AY954956.1	1e-07	24517	24487	31
ACCACGTCAATTAAGACGTGGTTACCCTAAT	17.889	84	98	1571384	0.0001	166	188	23	MS7_0645	pyridine nucleotide-disulfide oxidoreductase family protein[Staphylococcus aureus subsp. aureus 11819-97]	NC_017351.1	686824	687024	BA000033.2	1e-07	1529291	1529321	31
ACCACTATTAAAATTACCACCTATGTTATAA	17.889	84	98	1572948	4e-09	444	414	31	lukS-PV	Panton-Valentine leukocidin chain S precursor[Staphylococcus aureus subsp. aureus SA957]	NC_022442.1	1534859	1535797	AY954956.1	1e-07	24532	24502	31
ACCACTGTGTACTAATGGGGGTAATTCATTG	17.889	84	98	1572693	4e-09	699	669	31	lukS-PV	Panton-Valentine leukocidin chain S precursor[Staphylococcus aureus subsp. aureus SA957]	NC_022442.1	1534859	1535797	BA000033.2	1e-07	1530600	1530630	31
ACCATAAGAATAACCTACCGTTTGTTGTACT	17.889	84	98	1572023	4e-09	429	399	31	lukF-PV	Panton-Valentine leukocidin chain F precursor[Staphylococcus aureus subsp. aureus SA957]	NC_022442.1	1533880	1534857	BA000033.2	1e-07	1529930	1529960	31
ACCATAAGTTGAATGATAACTATCTCTGCCA	17.889	84	98	1571813	4e-09	639	609	31	lukF-PV	Panton-Valentine leukocidin chain F precursor[Staphylococcus aureus subsp. aureus SA957]	NC_022442.1	1533880	1534857	BA000033.2	1e-07	1529720	1529750	31
ACCATATGGCAGAGATAGTTATCATTCAACT	17.889	84	98	1571819	4e-09	603	633	31	lukF-PV	Panton-Valentine leukocidin chain F precursor[Staphylococcus aureus subsp. aureus SA957]	NC_022442.1	1533880	1534857	BA000033.2	1e-07	1529756	1529726	31
ACCATTACCTCCTGTTGATGGACCACTATTA	17.889	84	98	1572927	4e-09	465	435	31	lukS-PV	Panton-Valentine leukocidin chain S precursor[Staphylococcus aureus subsp. aureus SA957]	NC_022442.1	1534859	1535797	AY954956.1	1e-07	24553	24523	31
ACCCCAATAAAATTGAGAACTAATAGTGTCT	17.889	84	98	1572143	4e-09	309	279	31	lukF-PV	Panton-Valentine leukocidin chain F precursor[Staphylococcus aureus subsp. aureus SA957]	NC_022442.1	1533880	1534857	BA000033.2	1e-07	1530050	1530080	31
ACCCCCATTAGTACACAGTGGTTTCAATCCT	17.889	84	98	1572684	4e-09	678	708	31	lukS-PV	Panton-Valentine leukocidin chain S precursor[Staphylococcus aureus subsp. aureus SA957]	NC_022442.1	1534859	1535797	BA000033.2	1e-07	1530621	1530591	31
ACCCTAATATAGAAAGAAAGTGTTTGTAAAT	17.889	84	98	1571407	0.017	47	69	23	SAZ172_0994	GNAT family acetyltransferase YjcF[Staphylococcus aureus subsp. aureus Z172]	NC_022604.1	1077258	1077692	BA000033.2	1e-07	1529314	1529344	31
ACCTAAAAATCAAAATGAAGAATTTCAAGTA	17.889	84	98	1572050	4e-09	372	402	31	lukF-PV	Panton-Valentine leukocidin chain F precursor[Staphylococcus aureus subsp. aureus SA957]	NC_022442.1	1533880	1534857	BA000033.2	1e-07	1529987	1529957	31
ACCTAATGTTTGACTAACATTTACTGAATCT	17.889	84	98	1572978	4e-09	414	384	31	lukS-PV	Panton-Valentine leukocidin chain S precursor[Staphylococcus aureus subsp. aureus SA957]	NC_022442.1	1534859	1535797	AY954956.1	1e-07	24502	24472	31
ACCTACCGTTTGTTGTACTTGAAATTCTTCA	17.889	84	98	1572035	4e-09	417	387	31	lukF-PV	Panton-Valentine leukocidin chain F precursor[Staphylococcus aureus subsp. aureus SA957]	NC_022442.1	1533880	1534857	BA000033.2	1e-07	1529942	1529972	31
ACCTATGTTATAACCTAATGTTTGACTAACA	17.889	84	98	1572966	4e-09	426	396	31	lukS-PV	Panton-Valentine leukocidin chain S precursor[Staphylococcus aureus subsp. aureus SA957]	NC_022442.1	1534859	1535797	AY954956.1	1e-07	24514	24484	31
ACCTCAGCGCCATCACCAATATTCTCAATAT	17.889	84	98	1573270	4e-09	122	92	31	lukS-PV	Panton-Valentine leukocidin chain S precursor[Staphylococcus aureus subsp. aureus SA957]	NC_022442.1	1534859	1535797	AY954956.1	1e-07	24210	24180	31
ACCTCCTGTTGATGGACCACTATTAAAATTA	17.889	84	98	1572933	4e-09	459	429	31	lukS-PV	Panton-Valentine leukocidin chain S precursor[Staphylococcus aureus subsp. aureus SA957]	NC_022442.1	1534859	1535797	AY954956.1	1e-07	24547	24517	31
ACCTCTGGATAACACTGGCATTTTGTGATAT	17.889	84	98	1571723	4e-09	729	699	31	lukF-PV	Panton-Valentine leukocidin chain F precursor[Staphylococcus aureus subsp. aureus SA957]	NC_022442.1	1533880	1534857	BA000033.2	1e-07	1529630	1529660	31
ACCTGTAAGTGAGAAAAAGGTTGATGATAAA	17.889	84	98	1572335	4e-09	87	117	31	lukF-PV	Panton-Valentine leukocidin chain F precursor[Staphylococcus aureus subsp. aureus SA957]	NC_022442.1	1533880	1534857	BA000033.2	1e-07	1530272	1530242	31
ACCTTGCATTTTTAAAATCAAAGCGTCTTTG	17.889	84	98	1573152	4e-09	240	210	31	lukS-PV	Panton-Valentine leukocidin chain S precursor[Staphylococcus aureus subsp. aureus SA957]	NC_022442.1	1534859	1535797	AY954956.1	1e-07	24328	24298	31
ACGAAGTAGCAATAGGAGTGATTATTCCTAA	17.889	84	98	1573325	4e-09	67	37	31	lukS-PV	Panton-Valentine leukocidin chain S precursor[Staphylococcus aureus subsp. aureus SA957]	NC_022442.1	1534859	1535797	AY954956.1	1e-07	24155	24125	31
ACGCATTTGTAAACAGAAATTACACAGTTAA	17.889	84	98	1572505	4e-09	857	887	31	lukS-PV	Panton-Valentine leukocidin chain S precursor[Staphylococcus aureus subsp. aureus SA957]	NC_022442.1	1534859	1535797	BA000033.2	1e-07	1530442	1530412	31
ACGCTTTGATTTTAAAAATGCAAGGTTTTAT	17.889	84	98	1573147	4e-09	215	245	31	lukS-PV	Panton-Valentine leukocidin chain S precursor[Staphylococcus aureus subsp. aureus SA957]	NC_022442.1	1534859	1535797	AY954956.1	1e-07	24303	24333	31
ACGGTAGGTTATTCTTATGGTGGAGATATTA	17.889	84	98	1572013	4e-09	409	439	31	lukF-PV	Panton-Valentine leukocidin chain F precursor[Staphylococcus aureus subsp. aureus SA957]	NC_022442.1	1533880	1534857	BA000033.2	1e-07	1529950	1529920	31
ACGTATGGCAGAAATATGGATGTTACTCATG	17.889	84	98	1572593	4e-09	769	799	31	lukS-PV	Panton-Valentine leukocidin chain S precursor[Staphylococcus aureus subsp. aureus SA957]	NC_022442.1	1534859	1535797	BA000033.2	1e-07	1530530	1530500	31
ACGTCAATTAAGACGTGGTTACCCTAATATA	17.889	84	98	1571387	0.005	169	188	20	MS7_0645	pyridine nucleotide-disulfide oxidoreductase family protein[Staphylococcus aureus subsp. aureus 11819-97]	NC_017351.1	686824	687024	BA000033.2	1e-07	1529294	1529324	31
ACGTTATTTCAAATTCACTTGTATCTCCTGA	17.889	84	98	1572620	4e-09	772	742	31	lukS-PV	Panton-Valentine leukocidin chain S precursor[Staphylococcus aureus subsp. aureus SA957]	NC_022442.1	1534859	1535797	BA000033.2	1e-07	1530527	1530557	31
ACGTTGTAGATTATGCACCTAAAAATCAAAA	17.889	84	98	1572066	4e-09	356	386	31	lukF-PV	Panton-Valentine leukocidin chain F precursor[Staphylococcus aureus subsp. aureus SA957]	NC_022442.1	1533880	1534857	BA000033.2	1e-07	1530003	1529973	31
ACGTTTACTGAGTCATTAGAATCTGAATTAA	17.889	84	98	1572093	4e-09	359	329	31	lukF-PV	Panton-Valentine leukocidin chain F precursor[Staphylococcus aureus subsp. aureus SA957]	NC_022442.1	1533880	1534857	BA000033.2	1e-07	1530000	1530030	31
ACTAACATTTACTGAATCTATTTTATTTTTA	17.889	84	98	1572990	4e-09	402	372	31	lukS-PV	Panton-Valentine leukocidin chain S precursor[Staphylococcus aureus subsp. aureus SA957]	NC_022442.1	1534859	1535797	AY954956.1	1e-07	24490	24460	31
ACTAATAGTGTCTTTTGGATTTGGCTTTGTA	17.889	84	98	1572161	4e-09	291	261	31	lukF-PV	Panton-Valentine leukocidin chain F precursor[Staphylococcus aureus subsp. aureus SA957]	NC_022442.1	1533880	1534857	BA000033.2	1e-07	1530068	1530098	31
ACTAATTGTTTTTGAATAATTAAATGAACCA	17.889	84	98	1572900	4e-09	492	462	31	lukS-PV	Panton-Valentine leukocidin chain S precursor[Staphylococcus aureus subsp. aureus SA957]	NC_022442.1	1534859	1535797	AY954956.1	1e-07	24580	24550	31
ACTAATTTCAAAAAAATTGGTTGGGATGTTG	17.889	84	98	1571881	4e-09	541	571	31	lukF-PV	Panton-Valentine leukocidin chain F precursor[Staphylococcus aureus subsp. aureus SA957]	NC_022442.1	1533880	1534857	BA000033.2	1e-07	1529818	1529788	31
ACTACCTCAGCGCCATCACCAATATTCTCAA	17.889	84	98	1573267	4e-09	125	95	31	lukS-PV	Panton-Valentine leukocidin chain S precursor[Staphylococcus aureus subsp. aureus SA957]	NC_022442.1	1534859	1535797	AY954956.1	1e-07	24213	24183	31
ACTACTTATTACAATTACAAAAACACAGATC	17.889	84	98	1573106	4e-09	256	286	31	lukS-PV	Panton-Valentine leukocidin chain S precursor[Staphylococcus aureus subsp. aureus SA957]	NC_022442.1	1534859	1535797	AY954956.1	1e-07	24344	24374	31
ACTAGCTTAGATAAAAGAACTAATTTCAAAA	17.889	84	98	1571899	4e-09	523	553	31	lukF-PV	Panton-Valentine leukocidin chain F precursor[Staphylococcus aureus subsp. aureus SA957]	NC_022442.1	1533880	1534857	BA000033.2	1e-07	1529836	1529806	31
ACTATCTCTGCCATATGGTCCCCAACCATTA	17.889	84	98	1571831	4e-09	621	591	31	lukF-PV	Panton-Valentine leukocidin chain F precursor[Staphylococcus aureus subsp. aureus SA957]	NC_022442.1	1533880	1534857	AB044554.1	1e-07	41832	41802	31
ACTATGGCAATAGTTATTTAGAAGGATCTAG	17.889	84	98	1572544	4e-09	818	848	31	lukS-PV	Panton-Valentine leukocidin chain S precursor[Staphylococcus aureus subsp. aureus SA957]	NC_022442.1	1534859	1535797	BA000033.2	1e-07	1530481	1530451	31
ACTATTAAAATTACCACCTATGTTATAACCT	17.889	84	98	1572951	4e-09	441	411	31	lukS-PV	Panton-Valentine leukocidin chain S precursor[Staphylococcus aureus subsp. aureus SA957]	NC_022442.1	1534859	1535797	AY954956.1	1e-07	24529	24499	31
ACTATTAGTTCTCAATTTTATTGGGGTTCTA	17.889	84	98	1572139	4e-09	283	313	31	lukF-PV	Panton-Valentine leukocidin chain F precursor[Staphylococcus aureus subsp. aureus SA957]	NC_022442.1	1533880	1534857	BA000033.2	1e-07	1530076	1530046	31
ACTATTGCCATAGTGTGTTGTTCTTCTAGTA	17.889	84	98	1572561	4e-09	831	801	31	lukS-PV	Panton-Valentine leukocidin chain S precursor[Staphylococcus aureus subsp. aureus SA957]	NC_022442.1	1534859	1535797	BA000033.2	1e-07	1530468	1530498	31
ACTATTTTTTTCATATCAATTATGTCCTTTC	17.889	84	98	1572438	0.22	337	357	21	STP1_0412	putative exonuclease[Staphylococcus pasteuri SP1]	NC_022737.1	472128	472682	BA000033.2	1e-07	1530345	1530375	31
ACTCAAAGCTGCTGGAAACATTTATTCTGGC	17.889	84	98	1572194	4e-09	228	258	31	lukF-PV	Panton-Valentine leukocidin chain F precursor[Staphylococcus aureus subsp. aureus SA957]	NC_022442.1	1533880	1534857	BA000033.2	1e-07	1530131	1530101	31
ACTCAATCTAAGGAAAAAAATCCTATGAGCT	17.889	84	98	1571476	4e-09	946	976	31	lukF-PV	Panton-Valentine leukocidin chain F precursor[Staphylococcus aureus subsp. aureus SA957]	NC_022442.1	1533880	1534857	BA000033.2	1e-07	1529413	1529383	31
ACTCAGTAAACGTTGTAGATTATGCACCTAA	17.889	84	98	1572075	4e-09	347	377	31	lukF-PV	Panton-Valentine leukocidin chain F precursor[Staphylococcus aureus subsp. aureus SA957]	NC_022442.1	1533880	1534857	BA000033.2	1e-07	1530012	1529982	31
ACTCATGCTACTAGAAGAACAACACACTATG	17.889	84	98	1572569	4e-09	793	823	31	lukS-PV	Panton-Valentine leukocidin chain S precursor[Staphylococcus aureus subsp. aureus SA957]	NC_022442.1	1534859	1535797	BA000033.2	1e-07	1530506	1530476	31
ACTCCTATTGCTACTTCGTTTCATGAATCTA	17.889	84	98	1573313	4e-09	49	79	31	lukS-PV	Panton-Valentine leukocidin chain S precursor[Staphylococcus aureus subsp. aureus SA957]	NC_022442.1	1534859	1535797	AY954956.1	1e-07	24137	24167	31
ACTGAATATTTTGTGTGACCCCCCACTTATC	17.889	84	98	1573211	4e-09	181	151	31	lukS-PV	Panton-Valentine leukocidin chain S precursor[Staphylococcus aureus subsp. aureus SA957]	NC_022442.1	1534859	1535797	AY954956.1	1e-07	24269	24239	31
ACTGAGTCATTAGAATCTGAATTAATTGAAA	17.889	84	98	1572099	4e-09	353	323	31	lukF-PV	Panton-Valentine leukocidin chain F precursor[Staphylococcus aureus subsp. aureus SA957]	NC_022442.1	1533880	1534857	BA000033.2	1e-07	1530006	1530036	31
ACTGATGATTTGACTATTTTTTTCATATCAA	17.889	84	98	1572426	2e-06	26	1	26	lukF-PV	Panton-Valentine leukocidin chain F precursor[Staphylococcus aureus subsp. aureus SA957]	NC_022442.1	1533880	1534857	BA000033.2	1e-07	1530333	1530363	31
ACTGCAACATCAGATTCCGATAAGTTAAAAA	17.889	84	98	1572286	4e-09	136	166	31	lukF-PV	Panton-Valentine leukocidin chain F precursor[Staphylococcus aureus subsp. aureus SA957]	NC_022442.1	1533880	1534857	BA000033.2	1e-07	1530223	1530193	31
ACTGGAAAACTCATGAAATTAAAGTGAAAGG	17.889	84	98	1572463	4e-09	899	929	31	lukS-PV	Panton-Valentine leukocidin chain S precursor[Staphylococcus aureus subsp. aureus SA957]	NC_022442.1	1534859	1535797	BA000033.2	1e-07	1530400	1530370	31
ACTGGATAGGTAATAATTATAAAGATGAAAA	17.889	84	98	1571571	4e-09	851	881	31	lukF-PV	Panton-Valentine leukocidin chain F precursor[Staphylococcus aureus subsp. aureus SA957]	NC_022442.1	1533880	1534857	BA000033.2	1e-07	1529508	1529478	31
ACTGTATGATTTTCCCAATCAACTTCATAAA	17.889	84	98	1571520	4e-09	932	902	31	lukF-PV	Panton-Valentine leukocidin chain F precursor[Staphylococcus aureus subsp. aureus SA957]	NC_022442.1	1533880	1534857	BA000033.2	1e-07	1529427	1529457	31
ACTGTATTGGATAGCAAAAGCAATGCAATTG	17.889	84	98	1572387	4e-09	65	35	31	lukF-PV	Panton-Valentine leukocidin chain F precursor[Staphylococcus aureus subsp. aureus SA957]	NC_022442.1	1533880	1534857	BA000033.2	1e-07	1530294	1530324	31
ACTGTGTACTAATGGGGGTAATTCATTGTCT	17.889	84	98	1572696	4e-09	696	666	31	lukS-PV	Panton-Valentine leukocidin chain S precursor[Staphylococcus aureus subsp. aureus SA957]	NC_022442.1	1534859	1535797	BA000033.2	1e-07	1530603	1530633	31
ACTGTTACTTATCAAAGAGAAATGGATAGAT	17.889	84	98	1571626	4e-09	796	826	31	lukF-PV	Panton-Valentine leukocidin chain F precursor[Staphylococcus aureus subsp. aureus SA957]	NC_022442.1	1533880	1534857	BA000033.2	1e-07	1529563	1529533	31
ACTGTTTCTCATGAAAAAGGCTCAGGAGATA	17.889	84	98	1572641	4e-09	721	751	31	lukS-PV	Panton-Valentine leukocidin chain S precursor[Staphylococcus aureus subsp. aureus SA957]	NC_022442.1	1534859	1535797	BA000033.2	1e-07	1530578	1530548	31
ACTTAAATGCTGGACAAAACTTCTTGGAATA	17.889	84	98	1571751	4e-09	671	701	31	lukF-PV	Panton-Valentine leukocidin chain F precursor[Staphylococcus aureus subsp. aureus SA957]	NC_022442.1	1533880	1534857	BA000033.2	1e-07	1529688	1529658	31
ACTTACAGGTGTGATATGTTGAGCTGCATCA	17.889	84	98	1572356	4e-09	96	66	31	lukF-PV	Panton-Valentine leukocidin chain F precursor[Staphylococcus aureus subsp. aureus SA957]	NC_022442.1	1533880	1534857	BA000033.2	1e-07	1530263	1530293	31
ACTTAGAACCCCAATAAAATTGAGAACTAAT	17.889	84	98	1572136	4e-09	316	286	31	lukF-PV	Panton-Valentine leukocidin chain F precursor[Staphylococcus aureus subsp. aureus SA957]	NC_022442.1	1533880	1534857	BA000033.2	1e-07	1530043	1530073	31
ACTTATCAAAGAGAAATGGATAGATATACAA	17.889	84	98	1571620	4e-09	802	832	31	lukF-PV	Panton-Valentine leukocidin chain F precursor[Staphylococcus aureus subsp. aureus SA957]	NC_022442.1	1533880	1534857	BA000033.2	1e-07	1529557	1529527	31
ACTTATGGTAATGAAATGTTTTTAGGCTCAA	17.889	84	98	1571791	4e-09	631	661	31	lukF-PV	Panton-Valentine leukocidin chain F precursor[Staphylococcus aureus subsp. aureus SA957]	NC_022442.1	1533880	1534857	BA000033.2	1e-07	1529728	1529698	31
ACTTATTACAATTACAAAAACACAGATCATA	17.889	84	98	1573103	4e-09	259	289	31	lukS-PV	Panton-Valentine leukocidin chain S precursor[Staphylococcus aureus subsp. aureus SA957]	NC_022442.1	1534859	1535797	AY954956.1	1e-07	24347	24377	31
ACTTCAATCCAGAATTTATTGGTGTCCTATC	17.889	84	98	1571691	4e-09	731	761	31	lukF-PV	Panton-Valentine leukocidin chain F precursor[Staphylococcus aureus subsp. aureus SA957]	NC_022442.1	1533880	1534857	BA000033.2	1e-07	1529628	1529598	31
ACTTCACTGATATAGTTTTGTTGATTATAAC	17.889	84	98	1572871	4e-09	521	491	31	lukS-PV	Panton-Valentine leukocidin chain S precursor[Staphylococcus aureus subsp. aureus SA957]	NC_022442.1	1534859	1535797	BA000033.2	1e-07	1530778	1530808	31
ACTTCACTGGATAGGTAATAATTATAAAGAT	17.889	84	98	1571576	4e-09	846	876	31	lukF-PV	Panton-Valentine leukocidin chain F precursor[Staphylococcus aureus subsp. aureus SA957]	NC_022442.1	1533880	1534857	BA000033.2	1e-07	1529513	1529483	31
ACTTCATATTTAACTGTGTAATTTCTGTTTA	17.889	84	98	1572496	4e-09	896	866	31	lukS-PV	Panton-Valentine leukocidin chain S precursor[Staphylococcus aureus subsp. aureus SA957]	NC_022442.1	1534859	1535797	BA000033.2	1e-07	1530403	1530433	31
ACTTCGTTTCATGAATCTAAAGCTGATAACA	17.889	84	98	1573301	4e-09	61	91	31	lukS-PV	Panton-Valentine leukocidin chain S precursor[Staphylococcus aureus subsp. aureus SA957]	NC_022442.1	1534859	1535797	AY954956.1	1e-07	24149	24179	31
ACTTGTATCTCCTGAGCCTTTTTCATGAGAA	17.889	84	98	1572636	4e-09	756	726	31	lukS-PV	Panton-Valentine leukocidin chain S precursor[Staphylococcus aureus subsp. aureus SA957]	NC_022442.1	1534859	1535797	BA000033.2	1e-07	1530543	1530573	31
ACTTGTATCTTCTGTTCTTTTGACTACCTCA	17.889	84	98	1573245	4e-09	147	117	31	lukS-PV	Panton-Valentine leukocidin chain S precursor[Staphylococcus aureus subsp. aureus SA957]	NC_022442.1	1534859	1535797	AY954956.1	1e-07	24235	24205	31
ACTTTCTTTCTATATTAGGGTAACCACGTCT	17.889	84	98	1571397	NA	NA	NA	NA	NA	NA	NA	NA	NA	BA000033.2	1e-07	1529334	1529304	31
ACTTTTAATTTTATTAAAGATAAAAGTTATG	17.889	84	98	1572241	4e-09	181	211	31	lukF-PV	Panton-Valentine leukocidin chain F precursor[Staphylococcus aureus subsp. aureus SA957]	NC_022442.1	1533880	1534857	BA000033.2	1e-07	1530178	1530148	31
ACTTTTATCTTTAATAAAATTAAAAGTTAAA	17.889	84	98	1572245	4e-09	207	177	31	lukF-PV	Panton-Valentine leukocidin chain F precursor[Staphylococcus aureus subsp. aureus SA957]	NC_022442.1	1533880	1534857	BA000033.2	1e-07	1530152	1530182	31
ACTTTTGGAATCAACTTCACTGGATAGGTAA	17.889	84	98	1571589	4e-09	833	863	31	lukF-PV	Panton-Valentine leukocidin chain F precursor[Staphylococcus aureus subsp. aureus SA957]	NC_022442.1	1533880	1534857	BA000033.2	1e-07	1529526	1529496	31
ACTTTTTATCTTTAACAAAATCAAACTGAAT	17.889	84	98	1573187	4e-09	205	175	31	lukS-PV	Panton-Valentine leukocidin chain S precursor[Staphylococcus aureus subsp. aureus SA957]	NC_022442.1	1534859	1535797	AY954956.1	1e-07	24293	24263	31
AGAAACAGTTGCAATAAATGAAGGATTGAAA	17.889	84	98	1572663	4e-09	729	699	31	lukS-PV	Panton-Valentine leukocidin chain S precursor[Staphylococcus aureus subsp. aureus SA957]	NC_022442.1	1534859	1535797	BA000033.2	1e-07	1530570	1530600	31
AGAAAGCTATAGAACTAGCTTAGATAAAAGA	17.889	84	98	1571912	4e-09	510	540	31	lukF-PV	Panton-Valentine leukocidin chain F precursor[Staphylococcus aureus subsp. aureus SA957]	NC_022442.1	1533880	1534857	BA000033.2	1e-07	1529849	1529819	31
AGAAAGTGTTTGTAAATTTTAACATATTTAA	17.889	84	98	1571421	0.79	2051	2029	23	SPSINT_0503	primase, superantigen-encoding pathogenicity islands SaPI[Staphylococcus pseudintermedius HKU10-03]	NC_014925.1	548920	551289	BA000033.2	1e-07	1529328	1529358	31
AGAAATATGGATGTTACTCATGCTACTAGAA	17.889	84	98	1572584	4e-09	778	808	31	lukS-PV	Panton-Valentine leukocidin chain S precursor[Staphylococcus aureus subsp. aureus SA957]	NC_022442.1	1534859	1535797	BA000033.2	1e-07	1530521	1530491	31
AGAAATTACACAGTTAAATATGAAGTGAACT	17.889	84	98	1572491	4e-09	871	901	31	lukS-PV	Panton-Valentine leukocidin chain S precursor[Staphylococcus aureus subsp. aureus SA957]	NC_022442.1	1534859	1535797	BA000033.2	1e-07	1530428	1530398	31
AGAACAACACACTATGGCAATAGTTATTTAG	17.889	84	98	1572554	4e-09	808	838	31	lukS-PV	Panton-Valentine leukocidin chain S precursor[Staphylococcus aureus subsp. aureus SA957]	NC_022442.1	1534859	1535797	BA000033.2	1e-07	1530491	1530461	31
AGAACCCCAATAAAATTGAGAACTAATAGTG	17.889	84	98	1572140	4e-09	312	282	31	lukF-PV	Panton-Valentine leukocidin chain F precursor[Staphylococcus aureus subsp. aureus SA957]	NC_022442.1	1533880	1534857	BA000033.2	1e-07	1530047	1530077	31
AGAACTAATTTCAAAAAAATTGGTTGGGATG	17.889	84	98	1571884	4e-09	538	568	31	lukF-PV	Panton-Valentine leukocidin chain F precursor[Staphylococcus aureus subsp. aureus SA957]	NC_022442.1	1533880	1534857	BA000033.2	1e-07	1529821	1529791	31
AGAACTAGCTTAGATAAAAGAACTAATTTCA	17.889	84	98	1571902	4e-09	520	550	31	lukF-PV	Panton-Valentine leukocidin chain F precursor[Staphylococcus aureus subsp. aureus SA957]	NC_022442.1	1533880	1534857	BA000033.2	1e-07	1529839	1529809	31
AGAAGGATCTAGAATACACAACGCATTTGTA	17.889	84	98	1572525	4e-09	837	867	31	lukS-PV	Panton-Valentine leukocidin chain S precursor[Staphylococcus aureus subsp. aureus SA957]	NC_022442.1	1534859	1535797	BA000033.2	1e-07	1530462	1530432	31
AGAAGTTTTGTCCAGCATTTAAGTTGCTTTG	17.889	84	98	1571758	4e-09	694	664	31	lukF-PV	Panton-Valentine leukocidin chain F precursor[Staphylococcus aureus subsp. aureus SA957]	NC_022442.1	1533880	1534857	BA000033.2	1e-07	1529665	1529695	31
AGAATATTGGTGATGGCGCTGAGGTAGTCAA	17.889	84	98	1573264	4e-09	98	128	31	lukS-PV	Panton-Valentine leukocidin chain S precursor[Staphylococcus aureus subsp. aureus SA957]	NC_022442.1	1534859	1535797	AY954956.1	1e-07	24186	24216	31
AGAATCTGAATTAATTGAAATGTTGTACTTA	17.889	84	98	1572110	4e-09	342	312	31	lukF-PV	Panton-Valentine leukocidin chain F precursor[Staphylococcus aureus subsp. aureus SA957]	NC_022442.1	1533880	1534857	BA000033.2	1e-07	1530017	1530047	31
AGAATTTATTGGTGTCCTATCTCGAAAACAA	17.889	84	98	1571681	4e-09	741	771	31	lukF-PV	Panton-Valentine leukocidin chain F precursor[Staphylococcus aureus subsp. aureus SA957]	NC_022442.1	1533880	1534857	BA000033.2	1e-07	1529618	1529588	31
AGACAAAGCAACTTAAATGCTGGACAAAACT	17.889	84	98	1571761	4e-09	661	691	31	lukF-PV	Panton-Valentine leukocidin chain F precursor[Staphylococcus aureus subsp. aureus SA957]	NC_022442.1	1533880	1534857	BA000033.2	1e-07	1529698	1529668	31
AGACAATTAACTATAAACAAGAAAGCTATAG	17.889	84	98	1571931	4e-09	491	521	31	lukF-PV	Panton-Valentine leukocidin chain F precursor[Staphylococcus aureus subsp. aureus SA957]	NC_022442.1	1533880	1534857	BA000033.2	1e-07	1529868	1529838	31
AGACATTTTACCTAATGATGTGATAAATGAA	17.889	84	98	1572795	4e-09	597	567	31	lukS-PV	Panton-Valentine leukocidin chain S precursor[Staphylococcus aureus subsp. aureus SA957]	NC_022442.1	1534859	1535797	BA000033.2	1e-07	1530702	1530732	31
AGACCAATATTGTATTGGAAAGGCCACCTCA	17.889	84	98	1573063	4e-09	329	299	31	lukS-PV	Panton-Valentine leukocidin chain S precursor[Staphylococcus aureus subsp. aureus SA957]	NC_022442.1	1534859	1535797	AY954956.1	1e-07	24417	24387	31
AGACTACTTATTACAATTACAAAAACACAGA	17.889	84	98	1573108	4e-09	254	284	31	lukS-PV	Panton-Valentine leukocidin chain S precursor[Staphylococcus aureus subsp. aureus SA957]	NC_022442.1	1534859	1535797	AY954956.1	1e-07	24342	24372	31
AGAGAAATGGATAGATATACAAACTTTTGGA	17.889	84	98	1571611	4e-09	811	841	31	lukF-PV	Panton-Valentine leukocidin chain F precursor[Staphylococcus aureus subsp. aureus SA957]	NC_022442.1	1533880	1534857	BA000033.2	1e-07	1529548	1529518	31
AGAGATAGTTATCATTCAACTTATGGTAATG	17.889	84	98	1571809	4e-09	613	643	31	lukF-PV	Panton-Valentine leukocidin chain F precursor[Staphylococcus aureus subsp. aureus SA957]	NC_022442.1	1533880	1534857	BA000033.2	1e-07	1529746	1529716	31
AGAGATATTAATATCTCCACCATAAGAATAA	17.889	84	98	1572005	4e-09	447	417	31	lukF-PV	Panton-Valentine leukocidin chain F precursor[Staphylococcus aureus subsp. aureus SA957]	NC_022442.1	1533880	1534857	BA000033.2	1e-07	1529912	1529942	31
AGAGGTAACTTCAATCCAGAATTTATTGGTG	17.889	84	98	1571698	4e-09	724	754	31	lukF-PV	Panton-Valentine leukocidin chain F precursor[Staphylococcus aureus subsp. aureus SA957]	NC_022442.1	1533880	1534857	BA000033.2	1e-07	1529635	1529605	31
AGATAAAAGTTATGATAAAGATACATTAATA	17.889	84	98	1572224	4e-09	198	228	31	lukF-PV	Panton-Valentine leukocidin chain F precursor[Staphylococcus aureus subsp. aureus SA957]	NC_022442.1	1533880	1534857	BA000033.2	1e-07	1530161	1530131	31
AGATAATCAAAAAATCTTAAATATGTTAAAA	17.889	84	98	1571437	0.061	1377	1402	29	SLUG_15830	putative cardiolipin synthase[Staphylococcus lugdunensis N920143]	NC_017353.1	1657515	1658996	BA000033.2	1e-07	1529374	1529344	31
AGATACAAGTGAATTTGAAATAACGTATGGC	17.889	84	98	1572615	4e-09	747	777	31	lukS-PV	Panton-Valentine leukocidin chain S precursor[Staphylococcus aureus subsp. aureus SA957]	NC_022442.1	1534859	1535797	BA000033.2	1e-07	1530552	1530522	31
AGATACATTAATACTCAAAGCTGCTGGAAAC	17.889	84	98	1572206	4e-09	216	246	31	lukF-PV	Panton-Valentine leukocidin chain F precursor[Staphylococcus aureus subsp. aureus SA957]	NC_022442.1	1533880	1534857	BA000033.2	1e-07	1530143	1530113	31
AGATACTCAATCTAAGGAAAAAAATCCTATG	17.889	84	98	1571480	4e-09	942	972	31	lukF-PV	Panton-Valentine leukocidin chain F precursor[Staphylococcus aureus subsp. aureus SA957]	NC_022442.1	1533880	1534857	BA000033.2	1e-07	1529417	1529387	31
AGATAGGACACCAATAAATTCTGGATTGAAG	17.889	84	98	1571690	4e-09	762	732	31	lukF-PV	Panton-Valentine leukocidin chain F precursor[Staphylococcus aureus subsp. aureus SA957]	NC_022442.1	1533880	1534857	BA000033.2	1e-07	1529597	1529627	31
AGATAGTTATCATTCAACTTATGGTAATGAA	17.889	84	98	1571807	4e-09	615	645	31	lukF-PV	Panton-Valentine leukocidin chain F precursor[Staphylococcus aureus subsp. aureus SA957]	NC_022442.1	1533880	1534857	BA000033.2	1e-07	1529744	1529714	31
AGATATACAAACTTTTGGAATCAACTTCACT	17.889	84	98	1571599	4e-09	823	853	31	lukF-PV	Panton-Valentine leukocidin chain F precursor[Staphylococcus aureus subsp. aureus SA957]	NC_022442.1	1533880	1534857	BA000033.2	1e-07	1529536	1529506	31
AGATATTAATATCTCCACCATAAGAATAACC	17.889	84	98	1572007	4e-09	445	415	31	lukF-PV	Panton-Valentine leukocidin chain F precursor[Staphylococcus aureus subsp. aureus SA957]	NC_022442.1	1533880	1534857	BA000033.2	1e-07	1529914	1529944	31
AGATCATATAAAAGCAATGAGGTGGCCTTTC	17.889	84	98	1573080	4e-09	282	312	31	lukS-PV	Panton-Valentine leukocidin chain S precursor[Staphylococcus aureus subsp. aureus SA957]	NC_022442.1	1534859	1535797	AY954956.1	1e-07	24370	24400	31
AGATTATGCACCTAAAAATCAAAATGAAGAA	17.889	84	98	1572059	4e-09	363	393	31	lukF-PV	Panton-Valentine leukocidin chain F precursor[Staphylococcus aureus subsp. aureus SA957]	NC_022442.1	1533880	1534857	BA000033.2	1e-07	1529996	1529966	31
AGATTCATGAAACGAAGTAGCAATAGGAGTG	17.889	84	98	1573314	4e-09	78	48	31	lukS-PV	Panton-Valentine leukocidin chain S precursor[Staphylococcus aureus subsp. aureus SA957]	NC_022442.1	1534859	1535797	AY954956.1	1e-07	24166	24136	31
AGATTGAGTATCTATTAATTTAACTGTATGA	17.889	84	98	1571498	4e-09	954	924	31	lukF-PV	Panton-Valentine leukocidin chain F precursor[Staphylococcus aureus subsp. aureus SA957]	NC_022442.1	1533880	1534857	BA000033.2	1e-07	1529405	1529435	31
AGATTTTAACTTTTAATTTTATTAAAGATAA	17.889	84	98	1572249	4e-09	173	203	31	lukF-PV	Panton-Valentine leukocidin chain F precursor[Staphylococcus aureus subsp. aureus SA957]	NC_022442.1	1533880	1534857	BA000033.2	1e-07	1530186	1530156	31
AGATTTTTTGATTATCTATCTGTTTAGCTCA	17.889	84	98	1571451	0.79	987	972	16	NA	NA	NA	NA	NA	BA000033.2	1e-07	1529358	1529388	31
AGCAAAAGCAATGCAATTGATGTAACAACTG	17.889	84	98	1572399	4e-09	53	23	31	lukF-PV	Panton-Valentine leukocidin chain F precursor[Staphylococcus aureus subsp. aureus SA957]	NC_022442.1	1533880	1534857	BA000033.2	1e-07	1530306	1530336	31
AGCAACTTAAATGCTGGACAAAACTTCTTGG	17.889	84	98	1571755	4e-09	667	697	31	lukF-PV	Panton-Valentine leukocidin chain F precursor[Staphylococcus aureus subsp. aureus SA957]	NC_022442.1	1533880	1534857	BA000033.2	1e-07	1529692	1529662	31
AGCAGCTTTGAGTATTAATGTATCTTTATCA	17.889	84	98	1572212	4e-09	240	210	31	lukF-PV	Panton-Valentine leukocidin chain F precursor[Staphylococcus aureus subsp. aureus SA957]	NC_022442.1	1533880	1534857	BA000033.2	1e-07	1530119	1530149	31
AGCATGAGTAACATCCATATTTCTGCCATAC	17.889	84	98	1572591	4e-09	801	771	31	lukS-PV	Panton-Valentine leukocidin chain S precursor[Staphylococcus aureus subsp. aureus SA957]	NC_022442.1	1534859	1535797	BA000033.2	1e-07	1530498	1530528	31
AGCATTTAAGTTGCTTTGTCTTGAGCCTAAA	17.889	84	98	1571771	4e-09	681	651	31	lukF-PV	Panton-Valentine leukocidin chain F precursor[Staphylococcus aureus subsp. aureus SA957]	NC_022442.1	1533880	1534857	BA000033.2	1e-07	1529678	1529708	31
AGCCAAATCCAAAAGACACTATTAGTTCTCA	17.889	84	98	1572156	4e-09	266	296	31	lukF-PV	Panton-Valentine leukocidin chain F precursor[Staphylococcus aureus subsp. aureus SA957]	NC_022442.1	1533880	1534857	BA000033.2	1e-07	1530093	1530063	31
AGCCAGAATAAATGTTTCCAGCAGCTTTGAG	17.889	84	98	1572193	4e-09	259	229	31	lukF-PV	Panton-Valentine leukocidin chain F precursor[Staphylococcus aureus subsp. aureus SA957]	NC_022442.1	1533880	1534857	BA000033.2	1e-07	1530100	1530130	31
AGCCGTTAGAGATATTAATATCTCCACCATA	17.889	84	98	1571998	4e-09	454	424	31	lukF-PV	Panton-Valentine leukocidin chain F precursor[Staphylococcus aureus subsp. aureus SA957]	NC_022442.1	1533880	1534857	BA000033.2	1e-07	1529905	1529935	31
AGCCTAAAAACATTTCATTACCATAAGTTGA	17.889	84	98	1571794	4e-09	658	628	31	lukF-PV	Panton-Valentine leukocidin chain F precursor[Staphylococcus aureus subsp. aureus SA957]	NC_022442.1	1533880	1534857	BA000033.2	1e-07	1529701	1529731	31
AGCCTTTTTCATGAGAAACAGTTGCAATAAA	17.889	84	98	1572650	4e-09	742	712	31	lukS-PV	Panton-Valentine leukocidin chain S precursor[Staphylococcus aureus subsp. aureus SA957]	NC_022442.1	1534859	1535797	BA000033.2	1e-07	1530557	1530587	31
AGCGCCATCACCAATATTCTCAATATTGTTA	17.889	84	98	1573275	4e-09	117	87	31	lukS-PV	Panton-Valentine leukocidin chain S precursor[Staphylococcus aureus subsp. aureus SA957]	NC_022442.1	1534859	1535797	AY954956.1	1e-07	24205	24175	31
AGCGTCTTTGTTATACTTTTTATCTTTAACA	17.889	84	98	1573173	4e-09	219	189	31	lukS-PV	Panton-Valentine leukocidin chain S precursor[Staphylococcus aureus subsp. aureus SA957]	NC_022442.1	1534859	1535797	AY954956.1	1e-07	24307	24277	31
AGCGTTTTGTTTTCGAGATAGGACACCAATA	17.889	84	98	1571675	4e-09	777	747	31	lukF-PV	Panton-Valentine leukocidin chain F precursor[Staphylococcus aureus subsp. aureus SA957]	NC_022442.1	1533880	1534857	BA000033.2	1e-07	1529582	1529612	31
AGCTAAACAGATAGATAATCAAAAAATCTTA	17.889	84	98	1571449	0.79	126	108	20	qoxA	quinol oxidase subunit II[Staphylococcus pseudintermedius ED99]	NC_017568.1	1773635	1774735	BA000033.2	1e-07	1529386	1529356	31
AGCTAATTCATTTATCACATCATTAGGTAAA	17.889	84	98	1572801	4e-09	561	591	31	lukS-PV	Panton-Valentine leukocidin chain S precursor[Staphylococcus aureus subsp. aureus SA957]	NC_022442.1	1534859	1535797	BA000033.2	1e-07	1530738	1530708	31
AGCTATAGAACTAGCTTAGATAAAAGAACTA	17.889	84	98	1571908	4e-09	514	544	31	lukF-PV	Panton-Valentine leukocidin chain F precursor[Staphylococcus aureus subsp. aureus SA957]	NC_022442.1	1533880	1534857	BA000033.2	1e-07	1529845	1529815	31
AGCTCAACATATCACACCTGTAAGTGAGAAA	17.889	84	98	1572350	4e-09	72	102	31	lukF-PV	Panton-Valentine leukocidin chain F precursor[Staphylococcus aureus subsp. aureus SA957]	NC_022442.1	1533880	1534857	BA000033.2	1e-07	1530287	1530257	31
AGCTGCATCAACTGTATTGGATAGCAAAAGC	17.889	84	98	1572377	4e-09	75	45	31	lukF-PV	Panton-Valentine leukocidin chain F precursor[Staphylococcus aureus subsp. aureus SA957]	NC_022442.1	1533880	1534857	BA000033.2	1e-07	1530284	1530314	31
AGCTGCTGGAAACATTTATTCTGGCTATACA	17.889	84	98	1572188	4e-09	234	264	31	lukF-PV	Panton-Valentine leukocidin chain F precursor[Staphylococcus aureus subsp. aureus SA957]	NC_022442.1	1533880	1534857	BA000033.2	1e-07	1530125	1530095	31
AGCTTAGATAAAAGAACTAATTTCAAAAAAA	17.889	84	98	1571896	4e-09	526	556	31	lukF-PV	Panton-Valentine leukocidin chain F precursor[Staphylococcus aureus subsp. aureus SA957]	NC_022442.1	1533880	1534857	BA000033.2	1e-07	1529833	1529803	31
AGCTTTAGATTCATGAAACGAAGTAGCAATA	17.889	84	98	1573308	4e-09	84	54	31	lukS-PV	Panton-Valentine leukocidin chain S precursor[Staphylococcus aureus subsp. aureus SA957]	NC_022442.1	1534859	1535797	AY954956.1	1e-07	24172	24142	31
AGCTTTCTTGTTTATAGTTAATTGTCTCTGA	17.889	84	98	1571935	4e-09	517	487	31	lukF-PV	Panton-Valentine leukocidin chain F precursor[Staphylococcus aureus subsp. aureus SA957]	NC_022442.1	1533880	1534857	BA000033.2	1e-07	1529842	1529872	31
AGCTTTGAGTATTAATGTATCTTTATCATAA	17.889	84	98	1572215	4e-09	237	207	31	lukF-PV	Panton-Valentine leukocidin chain F precursor[Staphylococcus aureus subsp. aureus SA957]	NC_022442.1	1533880	1534857	BA000033.2	1e-07	1530122	1530152	31
AGCTTTTATTCCCCATTGAACACTTTTTGAA	17.889	84	98	1572828	4e-09	564	534	31	lukS-PV	Panton-Valentine leukocidin chain S precursor[Staphylococcus aureus subsp. aureus SA957]	NC_022442.1	1534859	1535797	BA000033.2	1e-07	1530735	1530765	31
AGGAAAAAAATCCTATGAGCTAAACAGATAG	17.889	84	98	1571466	2e-07	956	987	32	SAAG_02096	panton-Valentine leukocidin chain F protein[Staphylococcus aureus subsp. aureus 55/2053]	NC_022113.1	1460399	1461385	BA000033.2	1e-07	1529403	1529373	31
AGGACACCAATAAATTCTGGATTGAAGTTAC	17.889	84	98	1571694	4e-09	758	728	31	lukF-PV	Panton-Valentine leukocidin chain F precursor[Staphylococcus aureus subsp. aureus SA957]	NC_022442.1	1533880	1534857	BA000033.2	1e-07	1529601	1529631	31
AGGACATAATTGATATGAAAAAAATAGTCAA	17.889	84	98	1572435	0.22	357	337	21	STP1_0412	putative exonuclease[Staphylococcus pasteuri SP1]	NC_022737.1	472128	472682	BA000033.2	1e-07	1530372	1530342	31
AGGAGGTAATGGTTCATTTAATTATTCAAAA	17.889	84	98	1572909	4e-09	453	483	31	lukS-PV	Panton-Valentine leukocidin chain S precursor[Staphylococcus aureus subsp. aureus SA957]	NC_022442.1	1534859	1535797	AY954956.1	1e-07	24541	24571	31
AGGATCTAGAATACACAACGCATTTGTAAAC	17.889	84	98	1572522	4e-09	840	870	31	lukS-PV	Panton-Valentine leukocidin chain S precursor[Staphylococcus aureus subsp. aureus SA957]	NC_022442.1	1534859	1535797	BA000033.2	1e-07	1530459	1530429	31
AGGCCACCTCATTGCTTTTATATGATCTGTG	17.889	84	98	1573083	4e-09	309	279	31	lukS-PV	Panton-Valentine leukocidin chain S precursor[Staphylococcus aureus subsp. aureus SA957]	NC_022442.1	1534859	1535797	AY954956.1	1e-07	24397	24367	31
AGGCTCAAGACAAAGCAACTTAAATGCTGGA	17.889	84	98	1571768	4e-09	654	684	31	lukF-PV	Panton-Valentine leukocidin chain F precursor[Staphylococcus aureus subsp. aureus SA957]	NC_022442.1	1533880	1534857	BA000033.2	1e-07	1529705	1529675	31
AGGCTCAGGAGATACAAGTGAATTTGAAATA	17.889	84	98	1572624	4e-09	738	768	31	lukS-PV	Panton-Valentine leukocidin chain S precursor[Staphylococcus aureus subsp. aureus SA957]	NC_022442.1	1534859	1535797	BA000033.2	1e-07	1530561	1530531	31
AGGTAAAATGTCTGGACATGATCCAAATTTA	17.889	84	98	1572777	4e-09	585	615	31	lukS-PV	Panton-Valentine leukocidin chain S precursor[Staphylococcus aureus subsp. aureus SA957]	NC_022442.1	1534859	1535797	BA000033.2	1e-07	1530714	1530684	31
AGGTAACTTCAATCCAGAATTTATTGGTGTC	17.889	84	98	1571696	4e-09	726	756	31	lukF-PV	Panton-Valentine leukocidin chain F precursor[Staphylococcus aureus subsp. aureus SA957]	NC_022442.1	1533880	1534857	BA000033.2	1e-07	1529633	1529603	31
AGGTAATAATTATAAAGATGAAAATAGAGCA	17.889	84	98	1571564	4e-09	858	888	31	lukF-PV	Panton-Valentine leukocidin chain F precursor[Staphylococcus aureus subsp. aureus SA957]	NC_022442.1	1533880	1534857	BA000033.2	1e-07	1529501	1529471	31
AGGTAATGGTTCAAAATCTTTTTCAGAGACA	17.889	84	98	1571957	4e-09	465	495	31	lukF-PV	Panton-Valentine leukocidin chain F precursor[Staphylococcus aureus subsp. aureus SA957]	NC_022442.1	1533880	1534857	BA000033.2	1e-07	1529894	1529864	31
AGGTAATGGTTCATTTAATTATTCAAAAACA	17.889	84	98	1572906	4e-09	456	486	31	lukS-PV	Panton-Valentine leukocidin chain S precursor[Staphylococcus aureus subsp. aureus SA957]	NC_022442.1	1534859	1535797	AY954956.1	1e-07	24544	24574	31
AGGTAGTCAAAAGAACAGAAGATACAAGTAG	17.889	84	98	1573243	4e-09	119	149	31	lukS-PV	Panton-Valentine leukocidin chain S precursor[Staphylococcus aureus subsp. aureus SA957]	NC_022442.1	1534859	1535797	AY954956.1	1e-07	24207	24237	31
AGGTGCATAATCTACAACGTTTACTGAGTCA	17.889	84	98	1572077	4e-09	375	345	31	lukF-PV	Panton-Valentine leukocidin chain F precursor[Staphylococcus aureus subsp. aureus SA957]	NC_022442.1	1533880	1534857	BA000033.2	1e-07	1529984	1530014	31
AGGTGGAGGTAATGGTTCAAAATCTTTTTCA	17.889	84	98	1571963	4e-09	459	489	31	lukF-PV	Panton-Valentine leukocidin chain F precursor[Staphylococcus aureus subsp. aureus SA957]	NC_022442.1	1533880	1534857	BA000033.2	1e-07	1529900	1529870	31
AGGTGGCCTTTCCAATACAATATTGGTCTCA	17.889	84	98	1573061	4e-09	301	331	31	lukS-PV	Panton-Valentine leukocidin chain S precursor[Staphylococcus aureus subsp. aureus SA957]	NC_022442.1	1534859	1535797	AY954956.1	1e-07	24389	24419	31
AGGTGGTAATTTTAATAGTGGTCCATCAACA	17.889	84	98	1572939	4e-09	423	453	31	lukS-PV	Panton-Valentine leukocidin chain S precursor[Staphylococcus aureus subsp. aureus SA957]	NC_022442.1	1534859	1535797	AY954956.1	1e-07	24511	24541	31
AGGTTATTCTTATGGTGGAGATATTAATATC	17.889	84	98	1572008	4e-09	414	444	31	lukF-PV	Panton-Valentine leukocidin chain F precursor[Staphylococcus aureus subsp. aureus SA957]	NC_022442.1	1533880	1534857	BA000033.2	1e-07	1529945	1529915	31
AGGTTTTATCAATTCAAAGACTACTTATTAC	17.889	84	98	1573125	4e-09	237	267	31	lukS-PV	Panton-Valentine leukocidin chain S precursor[Staphylococcus aureus subsp. aureus SA957]	NC_022442.1	1534859	1535797	AY954956.1	1e-07	24325	24355	31
AGTAAATGTTAGTCAAACATTAGGTTATAAC	17.889	84	98	1572972	4e-09	390	420	31	lukS-PV	Panton-Valentine leukocidin chain S precursor[Staphylococcus aureus subsp. aureus SA957]	NC_022442.1	1534859	1535797	AY954956.1	1e-07	24478	24508	31
AGTACAACATTTCAATTAATTCAGATTCTAA	17.889	84	98	1572108	4e-09	314	344	31	lukF-PV	Panton-Valentine leukocidin chain F precursor[Staphylococcus aureus subsp. aureus SA957]	NC_022442.1	1533880	1534857	BA000033.2	1e-07	1530045	1530015	31
AGTAGCAATAGGAGTGATTATTCCTAACGAC	17.889	84	98	1573329	4e-09	63	33	31	lukS-PV	Panton-Valentine leukocidin chain S precursor[Staphylococcus aureus subsp. aureus SA957]	NC_022442.1	1534859	1535797	AY954956.1	1e-07	24151	24121	31
AGTAGCATGAGTAACATCCATATTTCTGCCA	17.889	84	98	1572588	4e-09	804	774	31	lukS-PV	Panton-Valentine leukocidin chain S precursor[Staphylococcus aureus subsp. aureus SA957]	NC_022442.1	1534859	1535797	BA000033.2	1e-07	1530495	1530525	31
AGTATCTATTAATTTAACTGTATGATTTTCC	17.889	84	98	1571504	4e-09	948	918	31	lukF-PV	Panton-Valentine leukocidin chain F precursor[Staphylococcus aureus subsp. aureus SA957]	NC_022442.1	1533880	1534857	BA000033.2	1e-07	1529411	1529441	31
AGTCAAACATTAGGTTATAACATAGGTGGTA	17.889	84	98	1572962	4e-09	400	430	31	lukS-PV	Panton-Valentine leukocidin chain S precursor[Staphylococcus aureus subsp. aureus SA957]	NC_022442.1	1534859	1535797	AY954956.1	1e-07	24488	24518	31
AGTCAAATCATCAGTTGTTACATCAATTGCA	17.889	84	98	1572410	4e-09	12	42	31	lukF-PV	Panton-Valentine leukocidin chain F precursor[Staphylococcus aureus subsp. aureus SA957]	NC_022442.1	1533880	1534857	BA000033.2	1e-07	1530347	1530317	31
AGTCTCTCGGATTTTGACTATATGGTTTATA	17.889	84	98	1572737	4e-09	655	625	31	lukS-PV	Panton-Valentine leukocidin chain S precursor[Staphylococcus aureus subsp. aureus SA957]	NC_022442.1	1534859	1535797	BA000033.2	1e-07	1530644	1530674	31
AGTGAACTGGAAAACTCATGAAATTAAAGTG	17.889	84	98	1572468	4e-09	894	924	31	lukS-PV	Panton-Valentine leukocidin chain S precursor[Staphylococcus aureus subsp. aureus SA957]	NC_022442.1	1534859	1535797	BA000033.2	1e-07	1530405	1530375	31
AGTGAATTTGAAATAACGTATGGCAGAAATA	17.889	84	98	1572608	4e-09	754	784	31	lukS-PV	Panton-Valentine leukocidin chain S precursor[Staphylococcus aureus subsp. aureus SA957]	NC_022442.1	1534859	1535797	BA000033.2	1e-07	1530545	1530515	31
AGTGGGGGGTCACACAAAATATTCAGTTTGA	17.889	84	98	1573207	4e-09	155	185	31	lukS-PV	Panton-Valentine leukocidin chain S precursor[Staphylococcus aureus subsp. aureus SA957]	NC_022442.1	1534859	1535797	AY954956.1	1e-07	24243	24273	31
AGTGGTTTCAATCCTTCATTTATTGCAACTG	17.889	84	98	1572668	4e-09	694	724	31	lukS-PV	Panton-Valentine leukocidin chain S precursor[Staphylococcus aureus subsp. aureus SA957]	NC_022442.1	1534859	1535797	BA000033.2	1e-07	1530605	1530575	31
AGTGTCTTTTGGATTTGGCTTTGTATAGCCA	17.889	84	98	1572167	4e-09	285	255	31	lukF-PV	Panton-Valentine leukocidin chain F precursor[Staphylococcus aureus subsp. aureus SA957]	NC_022442.1	1533880	1534857	BA000033.2	1e-07	1530074	1530104	31
AGTGTGTTGTTCTTCTAGTAGCATGAGTAAC	17.889	84	98	1572572	4e-09	820	790	31	lukS-PV	Panton-Valentine leukocidin chain S precursor[Staphylococcus aureus subsp. aureus SA957]	NC_022442.1	1534859	1535797	BA000033.2	1e-07	1530479	1530509	31
AGTGTTATCCAGAGGTAACTTCAATCCAGAA	17.889	84	98	1571708	4e-09	714	744	31	lukF-PV	Panton-Valentine leukocidin chain F precursor[Staphylococcus aureus subsp. aureus SA957]	NC_022442.1	1533880	1534857	BA000033.2	1e-07	1529645	1529615	31
AGTTAAAAATTTCTCAGATTTTAACTTTTAA	17.889	84	98	1572264	4e-09	158	188	31	lukF-PV	Panton-Valentine leukocidin chain F precursor[Staphylococcus aureus subsp. aureus SA957]	NC_022442.1	1533880	1534857	BA000033.2	1e-07	1530201	1530171	31
AGTTAAAATCTGAGAAATTTTTAACTTATCG	17.889	84	98	1572269	4e-09	183	153	31	lukF-PV	Panton-Valentine leukocidin chain F precursor[Staphylococcus aureus subsp. aureus SA957]	NC_022442.1	1533880	1534857	BA000033.2	1e-07	1530176	1530206	31
AGTTAAATTAATAGATACTCAATCTAAGGAA	17.889	84	98	1571492	4e-09	930	960	31	lukF-PV	Panton-Valentine leukocidin chain F precursor[Staphylococcus aureus subsp. aureus SA957]	NC_022442.1	1533880	1534857	BA000033.2	1e-07	1529429	1529399	31
AGTTAATTGTCTCTGAAAAAGATTTTGAACC	17.889	84	98	1571950	4e-09	502	472	31	lukF-PV	Panton-Valentine leukocidin chain F precursor[Staphylococcus aureus subsp. aureus SA957]	NC_022442.1	1533880	1534857	BA000033.2	1e-07	1529857	1529887	31
AGTTACCTCTGGATAACACTGGCATTTTGTG	17.889	84	98	1571719	4e-09	733	703	31	lukF-PV	Panton-Valentine leukocidin chain F precursor[Staphylococcus aureus subsp. aureus SA957]	NC_022442.1	1533880	1534857	BA000033.2	1e-07	1529626	1529656	31
AGTTATAATCAACAAAACTATATCAGTGAAG	17.889	84	98	1572872	4e-09	490	520	31	lukS-PV	Panton-Valentine leukocidin chain S precursor[Staphylococcus aureus subsp. aureus SA957]	NC_022442.1	1534859	1535797	BA000033.2	1e-07	1530809	1530779	31
AGTTATGATAAAGATACATTAATACTCAAAG	17.889	84	98	1572217	4e-09	205	235	31	lukF-PV	Panton-Valentine leukocidin chain F precursor[Staphylococcus aureus subsp. aureus SA957]	NC_022442.1	1533880	1534857	BA000033.2	1e-07	1530154	1530124	31
AGTTATTTAGAAGGATCTAGAATACACAACG	17.889	84	98	1572533	4e-09	829	859	31	lukS-PV	Panton-Valentine leukocidin chain S precursor[Staphylococcus aureus subsp. aureus SA957]	NC_022442.1	1534859	1535797	BA000033.2	1e-07	1530470	1530440	31
AGTTCTCAATTTTATTGGGGTTCTAAGTACA	17.889	84	98	1572133	4e-09	289	319	31	lukF-PV	Panton-Valentine leukocidin chain F precursor[Staphylococcus aureus subsp. aureus SA957]	NC_022442.1	1533880	1534857	BA000033.2	1e-07	1530070	1530040	31
AGTTGATTCCAAAAGTTTGTATATCTATCCA	17.889	84	98	1571604	4e-09	848	818	31	lukF-PV	Panton-Valentine leukocidin chain F precursor[Staphylococcus aureus subsp. aureus SA957]	NC_022442.1	1533880	1534857	BA000033.2	1e-07	1529511	1529541	31
AGTTGATTGGGAAAATCATACAGTTAAATTA	17.889	84	98	1571513	4e-09	909	939	31	lukF-PV	Panton-Valentine leukocidin chain F precursor[Staphylococcus aureus subsp. aureus SA957]	NC_022442.1	1533880	1534857	BA000033.2	1e-07	1529450	1529420	31
AGTTGCAATAAATGAAGGATTGAAACCACTG	17.889	84	98	1572669	4e-09	723	693	31	lukS-PV	Panton-Valentine leukocidin chain S precursor[Staphylococcus aureus subsp. aureus SA957]	NC_022442.1	1534859	1535797	BA000033.2	1e-07	1530576	1530606	31
AGTTGCTCTATTTTCATCTTTATAATTATTA	17.889	84	98	1571561	4e-09	891	861	31	lukF-PV	Panton-Valentine leukocidin chain F precursor[Staphylococcus aureus subsp. aureus SA957]	NC_022442.1	1533880	1534857	BA000033.2	1e-07	1529468	1529498	31
AGTTGCTTTGTCTTGAGCCTAAAAACATTTC	17.889	84	98	1571779	4e-09	673	643	31	lukF-PV	Panton-Valentine leukocidin chain F precursor[Staphylococcus aureus subsp. aureus SA957]	NC_022442.1	1533880	1534857	BA000033.2	1e-07	1529686	1529716	31
AGTTGTTACATCAATTGCATTGCTTTTGCTA	17.889	84	98	1572398	4e-09	24	54	31	lukF-PV	Panton-Valentine leukocidin chain F precursor[Staphylococcus aureus subsp. aureus SA957]	NC_022442.1	1533880	1534857	BA000033.2	1e-07	1530335	1530305	31
AGTTTGATTTTGTTAAAGATAAAAAGTATAA	17.889	84	98	1573183	4e-09	179	209	31	lukS-PV	Panton-Valentine leukocidin chain S precursor[Staphylococcus aureus subsp. aureus SA957]	NC_022442.1	1534859	1535797	AY954956.1	1e-07	24267	24297	31
AGTTTGTATATCTATCCATTTCTCTTTGATA	17.889	84	98	1571617	4e-09	835	805	31	lukF-PV	Panton-Valentine leukocidin chain F precursor[Staphylococcus aureus subsp. aureus SA957]	NC_022442.1	1533880	1534857	BA000033.2	1e-07	1529524	1529554	31
AGTTTTCCAGTTCACTTCATATTTAACTGTG	17.889	84	98	1572483	4e-09	909	879	31	lukS-PV	Panton-Valentine leukocidin chain S precursor[Staphylococcus aureus subsp. aureus SA957]	NC_022442.1	1534859	1535797	BA000033.2	1e-07	1530390	1530420	31
AGTTTTGTTGATTATAACTAATTGTTTTTGA	17.889	84	98	1572884	4e-09	508	478	31	lukS-PV	Panton-Valentine leukocidin chain S precursor[Staphylococcus aureus subsp. aureus SA957]	NC_022442.1	1534859	1535797	BA000033.2	1e-07	1530791	1530821	31
ATAAAAGAACTAATTTCAAAAAAATTGGTTG	17.889	84	98	1571889	4e-09	533	563	31	lukF-PV	Panton-Valentine leukocidin chain F precursor[Staphylococcus aureus subsp. aureus SA957]	NC_022442.1	1533880	1534857	BA000033.2	1e-07	1529826	1529796	31
ATAAAAGCAATGAGGTGGCCTTTCCAATACA	17.889	84	98	1573073	4e-09	289	319	31	lukS-PV	Panton-Valentine leukocidin chain S precursor[Staphylococcus aureus subsp. aureus SA957]	NC_022442.1	1534859	1535797	AY954956.1	1e-07	24377	24407	31
ATAAAAGCTAATTCATTTATCACATCATTAG	17.889	84	98	1572806	4e-09	556	586	31	lukS-PV	Panton-Valentine leukocidin chain S precursor[Staphylococcus aureus subsp. aureus SA957]	NC_022442.1	1534859	1535797	BA000033.2	1e-07	1530743	1530713	31
ATAAAAGTTATGATAAAGATACATTAATACT	17.889	84	98	1572222	4e-09	200	230	31	lukF-PV	Panton-Valentine leukocidin chain F precursor[Staphylococcus aureus subsp. aureus SA957]	NC_022442.1	1533880	1534857	BA000033.2	1e-07	1530159	1530129	31
ATAAAATAGATTCAGTAAATGTTAGTCAAAC	17.889	84	98	1572985	4e-09	377	407	31	lukS-PV	Panton-Valentine leukocidin chain S precursor[Staphylococcus aureus subsp. aureus SA957]	NC_022442.1	1534859	1535797	AY954956.1	1e-07	24465	24495	31
ATAAAATTGAGAACTAATAGTGTCTTTTGGA	17.889	84	98	1572149	4e-09	303	273	31	lukF-PV	Panton-Valentine leukocidin chain F precursor[Staphylococcus aureus subsp. aureus SA957]	NC_022442.1	1533880	1534857	BA000033.2	1e-07	1530056	1530086	31
ATAAACAAGAAAGCTATAGAACTAGCTTAGA	17.889	84	98	1571919	4e-09	503	533	31	lukF-PV	Panton-Valentine leukocidin chain F precursor[Staphylococcus aureus subsp. aureus SA957]	NC_022442.1	1533880	1534857	BA000033.2	1e-07	1529856	1529826	31
ATAAACCATATAGTCAAAATCCGAGAGACTA	17.889	84	98	1572736	4e-09	626	656	31	lukS-PV	Panton-Valentine leukocidin chain S precursor[Staphylococcus aureus subsp. aureus SA957]	NC_022442.1	1534859	1535797	BA000033.2	1e-07	1530673	1530643	31
ATAAAGATACATTAATACTCAAAGCTGCTGG	17.889	84	98	1572210	4e-09	212	242	31	lukF-PV	Panton-Valentine leukocidin chain F precursor[Staphylococcus aureus subsp. aureus SA957]	NC_022442.1	1533880	1534857	BA000033.2	1e-07	1530147	1530117	31
ATAAATGAAGGATTGAAACCACTGTGTACTA	17.889	84	98	1572676	4e-09	716	686	31	lukS-PV	Panton-Valentine leukocidin chain S precursor[Staphylococcus aureus subsp. aureus SA957]	NC_022442.1	1534859	1535797	BA000033.2	1e-07	1530583	1530613	31
ATAAATGAATTAGCTTTTATTCCCCATTGAA	17.889	84	98	1572817	4e-09	575	545	31	lukS-PV	Panton-Valentine leukocidin chain S precursor[Staphylococcus aureus subsp. aureus SA957]	NC_022442.1	1534859	1535797	BA000033.2	1e-07	1530724	1530754	31
ATAAATGTTTCCAGCAGCTTTGAGTATTAAT	17.889	84	98	1572200	4e-09	252	222	31	lukF-PV	Panton-Valentine leukocidin chain F precursor[Staphylococcus aureus subsp. aureus SA957]	NC_022442.1	1533880	1534857	BA000033.2	1e-07	1530107	1530137	31
ATAAATTCTGGATTGAAGTTACCTCTGGATA	17.889	84	98	1571703	4e-09	749	719	31	lukF-PV	Panton-Valentine leukocidin chain F precursor[Staphylococcus aureus subsp. aureus SA957]	NC_022442.1	1533880	1534857	BA000033.2	1e-07	1529610	1529640	31
ATAAATTTGGATCATGTCCAGACATTTTACC	17.889	84	98	1572776	4e-09	616	586	31	lukS-PV	Panton-Valentine leukocidin chain S precursor[Staphylococcus aureus subsp. aureus SA957]	NC_022442.1	1534859	1535797	BA000033.2	1e-07	1530683	1530713	31
ATAACAAAGACGCTTTGATTTTAAAAATGCA	17.889	84	98	1573156	4e-09	206	236	31	lukS-PV	Panton-Valentine leukocidin chain S precursor[Staphylococcus aureus subsp. aureus SA957]	NC_022442.1	1534859	1535797	AY954956.1	1e-07	24294	24324	31
ATAACAATATTGAGAATATTGGTGATGGCGC	17.889	84	98	1573276	4e-09	86	116	31	lukS-PV	Panton-Valentine leukocidin chain S precursor[Staphylococcus aureus subsp. aureus SA957]	NC_022442.1	1534859	1535797	AY954956.1	1e-07	24174	24204	31
ATAACACTGGCATTTTGTGATATTCCAAGAA	17.889	84	98	1571731	4e-09	721	691	31	lukF-PV	Panton-Valentine leukocidin chain F precursor[Staphylococcus aureus subsp. aureus SA957]	NC_022442.1	1533880	1534857	BA000033.2	1e-07	1529638	1529668	31
ATAACATAGGTGGTAATTTTAATAGTGGTCC	17.889	84	98	1572946	4e-09	416	446	31	lukS-PV	Panton-Valentine leukocidin chain S precursor[Staphylococcus aureus subsp. aureus SA957]	NC_022442.1	1534859	1535797	AY954956.1	1e-07	24504	24534	31
ATAACCACGTCAATTAAGACGTGGTTACCCT	17.889	84	98	1571381	2e-06	163	188	26	MS7_0645	pyridine nucleotide-disulfide oxidoreductase family protein[Staphylococcus aureus subsp. aureus 11819-97]	NC_017351.1	686824	687024	BA000033.2	1e-07	1529288	1529318	31
ATAACCTAATGTTTGACTAACATTTACTGAA	17.889	84	98	1572975	4e-09	417	387	31	lukS-PV	Panton-Valentine leukocidin chain S precursor[Staphylococcus aureus subsp. aureus SA957]	NC_022442.1	1534859	1535797	AY954956.1	1e-07	24505	24475	31
ATAACCTACCGTTTGTTGTACTTGAAATTCT	17.889	84	98	1572032	4e-09	420	390	31	lukF-PV	Panton-Valentine leukocidin chain F precursor[Staphylococcus aureus subsp. aureus SA957]	NC_022442.1	1533880	1534857	BA000033.2	1e-07	1529939	1529969	31
ATAACGTATGGCAGAAATATGGATGTTACTC	17.889	84	98	1572596	4e-09	766	796	31	lukS-PV	Panton-Valentine leukocidin chain S precursor[Staphylococcus aureus subsp. aureus SA957]	NC_022442.1	1534859	1535797	BA000033.2	1e-07	1530533	1530503	31
ATAACTAATTGTTTTTGAATAATTAAATGAA	17.889	84	98	1572897	4e-09	495	465	31	lukS-PV	Panton-Valentine leukocidin chain S precursor[Staphylococcus aureus subsp. aureus SA957]	NC_022442.1	1534859	1535797	AY954956.1	1e-07	24583	24553	31
ATAACTATCTCTGCCATATGGTCCCCAACCA	17.889	84	98	1571828	4e-09	624	594	31	lukF-PV	Panton-Valentine leukocidin chain F precursor[Staphylococcus aureus subsp. aureus SA957]	NC_022442.1	1533880	1534857	BA000033.2	1e-07	1529735	1529765	31
ATAACTATTGCCATAGTGTGTTGTTCTTCTA	17.889	84	98	1572558	4e-09	834	804	31	lukS-PV	Panton-Valentine leukocidin chain S precursor[Staphylococcus aureus subsp. aureus SA957]	NC_022442.1	1534859	1535797	BA000033.2	1e-07	1530465	1530495	31
ATAAGAATAACCTACCGTTTGTTGTACTTGA	17.889	84	98	1572026	4e-09	426	396	31	lukF-PV	Panton-Valentine leukocidin chain F precursor[Staphylococcus aureus subsp. aureus SA957]	NC_022442.1	1533880	1534857	BA000033.2	1e-07	1529933	1529963	31
ATAAGTAGTCTTTGAATTGATAAAACCTTGC	17.889	84	98	1573128	4e-09	264	234	31	lukS-PV	Panton-Valentine leukocidin chain S precursor[Staphylococcus aureus subsp. aureus SA957]	NC_022442.1	1534859	1535797	AY954956.1	1e-07	24352	24322	31
ATAAGTTGAATGATAACTATCTCTGCCATAT	17.889	84	98	1571816	4e-09	636	606	31	lukF-PV	Panton-Valentine leukocidin chain F precursor[Staphylococcus aureus subsp. aureus SA957]	NC_022442.1	1533880	1534857	BA000033.2	1e-07	1529723	1529753	31
ATAATCAACAAAACTATATCAGTGAAGTAGA	17.889	84	98	1572868	4e-09	494	524	31	lukS-PV	Panton-Valentine leukocidin chain S precursor[Staphylococcus aureus subsp. aureus SA957]	NC_022442.1	1534859	1535797	BA000033.2	1e-07	1530805	1530775	31
ATAATCACTCCTATTGCTACTTCGTTTCATG	17.889	84	98	1573319	4e-09	43	73	31	lukS-PV	Panton-Valentine leukocidin chain S precursor[Staphylococcus aureus subsp. aureus SA957]	NC_022442.1	1534859	1535797	AY954956.1	1e-07	24131	24161	31
ATAATCTACAACGTTTACTGAGTCATTAGAA	17.889	84	98	1572083	4e-09	369	339	31	lukF-PV	Panton-Valentine leukocidin chain F precursor[Staphylococcus aureus subsp. aureus SA957]	NC_022442.1	1533880	1534857	BA000033.2	1e-07	1529990	1530020	31
ATAATGGTTGGGGACCATATGGCAGAGATAG	17.889	84	98	1571832	4e-09	590	620	31	lukF-PV	Panton-Valentine leukocidin chain F precursor[Staphylococcus aureus subsp. aureus SA957]	NC_022442.1	1533880	1534857	AB044554.1	1e-07	41801	41831	31
ATAATTAAATGAACCATTACCTCCTGTTGAT	17.889	84	98	1572915	4e-09	477	447	31	lukS-PV	Panton-Valentine leukocidin chain S precursor[Staphylococcus aureus subsp. aureus SA957]	NC_022442.1	1534859	1535797	AY954956.1	1e-07	24565	24535	31
ATAATTATAAAGATGAAAATAGAGCAACTCA	17.889	84	98	1571559	4e-09	863	893	31	lukF-PV	Panton-Valentine leukocidin chain F precursor[Staphylococcus aureus subsp. aureus SA957]	NC_022442.1	1533880	1534857	BA000033.2	1e-07	1529496	1529466	31
ATAATTATTACCTATCCAGTGAAGTTGATTC	17.889	84	98	1571582	4e-09	870	840	31	lukF-PV	Panton-Valentine leukocidin chain F precursor[Staphylococcus aureus subsp. aureus SA957]	NC_022442.1	1533880	1534857	BA000033.2	1e-07	1529489	1529519	31
ATAATTGATATGAAAAAAATAGTCAAATCAT	17.889	84	98	1572430	0.0004	1	22	22	lukF-PV	Panton-Valentine leukocidin chain F precursor[Staphylococcus aureus subsp. aureus SA957]	NC_022442.1	1533880	1534857	BA000033.2	1e-07	1530367	1530337	31
ATACAAACTTTTGGAATCAACTTCACTGGAT	17.889	84	98	1571595	4e-09	827	857	31	lukF-PV	Panton-Valentine leukocidin chain F precursor[Staphylococcus aureus subsp. aureus SA957]	NC_022442.1	1533880	1534857	BA000033.2	1e-07	1529532	1529502	31
ATACAAAGCCAAATCCAAAAGACACTATTAG	17.889	84	98	1572162	4e-09	260	290	31	lukF-PV	Panton-Valentine leukocidin chain F precursor[Staphylococcus aureus subsp. aureus SA957]	NC_022442.1	1533880	1534857	BA000033.2	1e-07	1530099	1530069	31
ATACAAGTGAATTTGAAATAACGTATGGCAG	17.889	84	98	1572613	4e-09	749	779	31	lukS-PV	Panton-Valentine leukocidin chain S precursor[Staphylococcus aureus subsp. aureus SA957]	NC_022442.1	1534859	1535797	BA000033.2	1e-07	1530550	1530520	31
ATACACAACGCATTTGTAAACAGAAATTACA	17.889	84	98	1572512	4e-09	850	880	31	lukS-PV	Panton-Valentine leukocidin chain S precursor[Staphylococcus aureus subsp. aureus SA957]	NC_022442.1	1534859	1535797	BA000033.2	1e-07	1530449	1530419	31
ATACAGTTAAATTAATAGATACTCAATCTAA	17.889	84	98	1571496	4e-09	926	956	31	lukF-PV	Panton-Valentine leukocidin chain F precursor[Staphylococcus aureus subsp. aureus SA957]	NC_022442.1	1533880	1534857	BA000033.2	1e-07	1529433	1529403	31
ATACATTAATACTCAAAGCTGCTGGAAACAT	17.889	84	98	1572204	4e-09	218	248	31	lukF-PV	Panton-Valentine leukocidin chain F precursor[Staphylococcus aureus subsp. aureus SA957]	NC_022442.1	1533880	1534857	BA000033.2	1e-07	1530141	1530111	31
ATACGTTATTTCAAATTCACTTGTATCTCCT	17.889	84	98	1572618	4e-09	774	744	31	lukS-PV	Panton-Valentine leukocidin chain S precursor[Staphylococcus aureus subsp. aureus SA957]	NC_022442.1	1534859	1535797	BA000033.2	1e-07	1530525	1530555	31
ATACTCAAAGCTGCTGGAAACATTTATTCTG	17.889	84	98	1572196	4e-09	226	256	31	lukF-PV	Panton-Valentine leukocidin chain F precursor[Staphylococcus aureus subsp. aureus SA957]	NC_022442.1	1533880	1534857	BA000033.2	1e-07	1530133	1530103	31
ATACTCAATCTAAGGAAAAAAATCCTATGAG	17.889	84	98	1571478	4e-09	944	974	31	lukF-PV	Panton-Valentine leukocidin chain F precursor[Staphylococcus aureus subsp. aureus SA957]	NC_022442.1	1533880	1534857	BA000033.2	1e-07	1529415	1529385	31
ATACTTTTTATCTTTAACAAAATCAAACTGA	17.889	84	98	1573185	4e-09	207	177	31	lukS-PV	Panton-Valentine leukocidin chain S precursor[Staphylococcus aureus subsp. aureus SA957]	NC_022442.1	1534859	1535797	AY954956.1	1e-07	24295	24265	31
ATAGAAAGAAAGTGTTTGTAAATTTTAACAT	17.889	84	98	1571415	0.061	52	69	18	SAZ172_0994	GNAT family acetyltransferase YjcF[Staphylococcus aureus subsp. aureus Z172]	NC_022604.1	1077258	1077692	BA000033.2	1e-07	1529322	1529352	31
ATAGATAATCAAAAAATCTTAAATATGTTAA	17.889	84	98	1571439	0.061	1377	1402	29	SLUG_15830	putative cardiolipin synthase[Staphylococcus lugdunensis N920143]	NC_017353.1	1657515	1658996	BA000033.2	1e-07	1529376	1529346	31
ATAGATACTCAATCTAAGGAAAAAAATCCTA	17.889	84	98	1571482	4e-09	940	970	31	lukF-PV	Panton-Valentine leukocidin chain F precursor[Staphylococcus aureus subsp. aureus SA957]	NC_022442.1	1533880	1534857	BA000033.2	1e-07	1529419	1529389	31
ATAGATATACAAACTTTTGGAATCAACTTCA	17.889	84	98	1571601	4e-09	821	851	31	lukF-PV	Panton-Valentine leukocidin chain F precursor[Staphylococcus aureus subsp. aureus SA957]	NC_022442.1	1533880	1534857	BA000033.2	1e-07	1529538	1529508	31
ATAGATTCAGTAAATGTTAGTCAAACATTAG	17.889	84	98	1572980	4e-09	382	412	31	lukS-PV	Panton-Valentine leukocidin chain S precursor[Staphylococcus aureus subsp. aureus SA957]	NC_022442.1	1534859	1535797	AY954956.1	1e-07	24470	24500	31
ATAGCAAAAGCAATGCAATTGATGTAACAAC	17.889	84	98	1572397	4e-09	55	25	31	lukF-PV	Panton-Valentine leukocidin chain F precursor[Staphylococcus aureus subsp. aureus SA957]	NC_022442.1	1533880	1534857	BA000033.2	1e-07	1530304	1530334	31
ATAGCCAGAATAAATGTTTCCAGCAGCTTTG	17.889	84	98	1572191	4e-09	261	231	31	lukF-PV	Panton-Valentine leukocidin chain F precursor[Staphylococcus aureus subsp. aureus SA957]	NC_022442.1	1533880	1534857	BA000033.2	1e-07	1530098	1530128	31
ATAGCTTTCTTGTTTATAGTTAATTGTCTCT	17.889	84	98	1571933	4e-09	519	489	31	lukF-PV	Panton-Valentine leukocidin chain F precursor[Staphylococcus aureus subsp. aureus SA957]	NC_022442.1	1533880	1534857	BA000033.2	1e-07	1529840	1529870	31
ATAGGATTTTTTTCCTTAGATTGAGTATCTA	17.889	84	98	1571481	4e-09	971	941	31	lukF-PV	Panton-Valentine leukocidin chain F precursor[Staphylococcus aureus subsp. aureus SA957]	NC_022442.1	1533880	1534857	BA000033.2	1e-07	1529388	1529418	31
ATAGGTAATAATTATAAAGATGAAAATAGAG	17.889	84	98	1571566	4e-09	856	886	31	lukF-PV	Panton-Valentine leukocidin chain F precursor[Staphylococcus aureus subsp. aureus SA957]	NC_022442.1	1533880	1534857	BA000033.2	1e-07	1529503	1529473	31
ATAGGTGGTAATTTTAATAGTGGTCCATCAA	17.889	84	98	1572941	4e-09	421	451	31	lukS-PV	Panton-Valentine leukocidin chain S precursor[Staphylococcus aureus subsp. aureus SA957]	NC_022442.1	1534859	1535797	AY954956.1	1e-07	24509	24539	31
ATAGTCAAATCATCAGTTGTTACATCAATTG	17.889	84	98	1572412	4e-09	10	40	31	lukF-PV	Panton-Valentine leukocidin chain F precursor[Staphylococcus aureus subsp. aureus SA957]	NC_022442.1	1533880	1534857	BA000033.2	1e-07	1530349	1530319	31
ATAGTCTCTCGGATTTTGACTATATGGTTTA	17.889	84	98	1572735	4e-09	657	627	31	lukS-PV	Panton-Valentine leukocidin chain S precursor[Staphylococcus aureus subsp. aureus SA957]	NC_022442.1	1534859	1535797	BA000033.2	1e-07	1530642	1530672	31
ATAGTGGTCCATCAACAGGAGGTAATGGTTC	17.889	84	98	1572925	4e-09	437	467	31	lukS-PV	Panton-Valentine leukocidin chain S precursor[Staphylococcus aureus subsp. aureus SA957]	NC_022442.1	1534859	1535797	AY954956.1	1e-07	24525	24555	31
ATAGTGTCTTTTGGATTTGGCTTTGTATAGC	17.889	84	98	1572165	4e-09	287	257	31	lukF-PV	Panton-Valentine leukocidin chain F precursor[Staphylococcus aureus subsp. aureus SA957]	NC_022442.1	1533880	1534857	BA000033.2	1e-07	1530072	1530102	31
ATAGTGTGTTGTTCTTCTAGTAGCATGAGTA	17.889	84	98	1572570	4e-09	822	792	31	lukS-PV	Panton-Valentine leukocidin chain S precursor[Staphylococcus aureus subsp. aureus SA957]	NC_022442.1	1534859	1535797	BA000033.2	1e-07	1530477	1530507	31
ATAGTTAATTGTCTCTGAAAAAGATTTTGAA	17.889	84	98	1571948	4e-09	504	474	31	lukF-PV	Panton-Valentine leukocidin chain F precursor[Staphylococcus aureus subsp. aureus SA957]	NC_022442.1	1533880	1534857	BA000033.2	1e-07	1529855	1529885	31
ATAGTTATCATTCAACTTATGGTAATGAAAT	17.889	84	98	1571805	4e-09	617	647	31	lukF-PV	Panton-Valentine leukocidin chain F precursor[Staphylococcus aureus subsp. aureus SA957]	NC_022442.1	1533880	1534857	BA000033.2	1e-07	1529742	1529712	31
ATAGTTATTTAGAAGGATCTAGAATACACAA	17.889	84	98	1572535	4e-09	827	857	31	lukS-PV	Panton-Valentine leukocidin chain S precursor[Staphylococcus aureus subsp. aureus SA957]	NC_022442.1	1534859	1535797	BA000033.2	1e-07	1530472	1530442	31
ATATAAAAGCAATGAGGTGGCCTTTCCAATA	17.889	84	98	1573075	4e-09	287	317	31	lukS-PV	Panton-Valentine leukocidin chain S precursor[Staphylococcus aureus subsp. aureus SA957]	NC_022442.1	1534859	1535797	AY954956.1	1e-07	24375	24405	31
ATATAAACCATATAGTCAAAATCCGAGAGAC	17.889	84	98	1572738	4e-09	624	654	31	lukS-PV	Panton-Valentine leukocidin chain S precursor[Staphylococcus aureus subsp. aureus SA957]	NC_022442.1	1534859	1535797	BA000033.2	1e-07	1530675	1530645	31
ATATACAAACTTTTGGAATCAACTTCACTGG	17.889	84	98	1571597	4e-09	825	855	31	lukF-PV	Panton-Valentine leukocidin chain F precursor[Staphylococcus aureus subsp. aureus SA957]	NC_022442.1	1533880	1534857	BA000033.2	1e-07	1529534	1529504	31
ATATAGAAAGAAAGTGTTTGTAAATTTTAAC	17.889	84	98	1571413	0.017	47	69	23	SAZ172_0994	GNAT family acetyltransferase YjcF[Staphylococcus aureus subsp. aureus Z172]	NC_022604.1	1077258	1077692	BA000033.2	1e-07	1529320	1529350	31
ATATCAATTATGTCCTTTCACTTTAATTTCA	17.889	84	98	1572450	2e-07	939	912	28	NA	NA	NA	NA	NA	BA000033.2	1e-07	1530357	1530387	31
ATATCACACCTGTAAGTGAGAAAAAGGTTGA	17.889	84	98	1572342	4e-09	80	110	31	lukF-PV	Panton-Valentine leukocidin chain F precursor[Staphylococcus aureus subsp. aureus SA957]	NC_022442.1	1533880	1534857	BA000033.2	1e-07	1530279	1530249	31
ATATCCAACAAATAAATTTGGATCATGTCCA	17.889	84	98	1572765	4e-09	627	597	31	lukS-PV	Panton-Valentine leukocidin chain S precursor[Staphylococcus aureus subsp. aureus SA957]	NC_022442.1	1534859	1535797	BA000033.2	1e-07	1530672	1530702	31
ATATCTATCCATTTCTCTTTGATAAGTAACA	17.889	84	98	1571624	4e-09	828	798	31	lukF-PV	Panton-Valentine leukocidin chain F precursor[Staphylococcus aureus subsp. aureus SA957]	NC_022442.1	1533880	1534857	BA000033.2	1e-07	1529531	1529561	31
ATATGATCTGTGTTTTTGTAATTGTAATAAG	17.889	84	98	1573102	4e-09	290	260	31	lukS-PV	Panton-Valentine leukocidin chain S precursor[Staphylococcus aureus subsp. aureus SA957]	NC_022442.1	1534859	1535797	AY954956.1	1e-07	24378	24348	31
ATATGGATGTTACTCATGCTACTAGAAGAAC	17.889	84	98	1572580	4e-09	782	812	31	lukS-PV	Panton-Valentine leukocidin chain S precursor[Staphylococcus aureus subsp. aureus SA957]	NC_022442.1	1534859	1535797	BA000033.2	1e-07	1530517	1530487	31
ATATGGTTTATATCCAACAAATAAATTTGGA	17.889	84	98	1572756	4e-09	636	606	31	lukS-PV	Panton-Valentine leukocidin chain S precursor[Staphylococcus aureus subsp. aureus SA957]	NC_022442.1	1534859	1535797	BA000033.2	1e-07	1530663	1530693	31
ATATGTTAAAATTTACAAACACTTTCTTTCT	17.889	84	98	1571417	0.061	69	52	18	SAZ172_0994	GNAT family acetyltransferase YjcF[Staphylococcus aureus subsp. aureus Z172]	NC_022604.1	1077258	1077692	BA000033.2	1e-07	1529354	1529324	31
ATATGTTGAGCTGCATCAACTGTATTGGATA	17.889	84	98	1572369	4e-09	83	53	31	lukF-PV	Panton-Valentine leukocidin chain F precursor[Staphylococcus aureus subsp. aureus SA957]	NC_022442.1	1533880	1534857	BA000033.2	1e-07	1530276	1530306	31
ATATTAGGGTAACCACGTCTTAATTGACGTG	17.889	84	98	1571386	0.001	188	168	21	MS7_0646	transcriptional regulator family protein[Staphylococcus aureus subsp. aureus 11819-97]	NC_017351.1	687011	687451	BA000033.2	1e-07	1529323	1529293	31
ATATTCAGTTTGATTTTGTTAAAGATAAAAA	17.889	84	98	1573189	4e-09	173	203	31	lukS-PV	Panton-Valentine leukocidin chain S precursor[Staphylococcus aureus subsp. aureus SA957]	NC_022442.1	1534859	1535797	AY954956.1	1e-07	24261	24291	31
ATATTCCAAGAAGTTTTGTCCAGCATTTAAG	17.889	84	98	1571750	4e-09	702	672	31	lukF-PV	Panton-Valentine leukocidin chain F precursor[Staphylococcus aureus subsp. aureus SA957]	NC_022442.1	1533880	1534857	BA000033.2	1e-07	1529657	1529687	31
ATATTGGTGATGGCGCTGAGGTAGTCAAAAG	17.889	84	98	1573261	4e-09	101	131	31	lukS-PV	Panton-Valentine leukocidin chain S precursor[Staphylococcus aureus subsp. aureus SA957]	NC_022442.1	1534859	1535797	AY954956.1	1e-07	24189	24219	31
ATATTGTTATCAGCTTTAGATTCATGAAACG	17.889	84	98	1573297	4e-09	95	65	31	lukS-PV	Panton-Valentine leukocidin chain S precursor[Staphylococcus aureus subsp. aureus SA957]	NC_022442.1	1534859	1535797	AY954956.1	1e-07	24183	24153	31
ATATTTAACTGTGTAATTTCTGTTTACAAAT	17.889	84	98	1572501	4e-09	891	861	31	lukS-PV	Panton-Valentine leukocidin chain S precursor[Staphylococcus aureus subsp. aureus SA957]	NC_022442.1	1534859	1535797	BA000033.2	1e-07	1530408	1530438	31
ATATTTCTGCCATACGTTATTTCAAATTCAC	17.889	84	98	1572607	4e-09	785	755	31	lukS-PV	Panton-Valentine leukocidin chain S precursor[Staphylococcus aureus subsp. aureus SA957]	NC_022442.1	1534859	1535797	BA000033.2	1e-07	1530514	1530544	31
ATCAAAAAATCTTAAATATGTTAAAATTTAC	17.889	84	98	1571432	0.22	1381	1402	24	SLUG_15830	putative cardiolipin synthase[Staphylococcus lugdunensis N920143]	NC_017353.1	1657515	1658996	BA000033.2	1e-07	1529369	1529339	31
ATCAAAATGAAGAATTTCAAGTACAACAAAC	17.889	84	98	1572042	4e-09	380	410	31	lukF-PV	Panton-Valentine leukocidin chain F precursor[Staphylococcus aureus subsp. aureus SA957]	NC_022442.1	1533880	1534857	BA000033.2	1e-07	1529979	1529949	31
ATCAAACTGAATATTTTGTGTGACCCCCCAC	17.889	84	98	1573206	4e-09	186	156	31	lukS-PV	Panton-Valentine leukocidin chain S precursor[Staphylococcus aureus subsp. aureus SA957]	NC_022442.1	1534859	1535797	AY954956.1	1e-07	24274	24244	31
ATCAACCTTTTTCTCACTTACAGGTGTGATA	17.889	84	98	1572341	4e-09	111	81	31	lukF-PV	Panton-Valentine leukocidin chain F precursor[Staphylococcus aureus subsp. aureus SA957]	NC_022442.1	1533880	1534857	BA000033.2	1e-07	1530248	1530278	31
ATCAACTGTATTGGATAGCAAAAGCAATGCA	17.889	84	98	1572383	4e-09	69	39	31	lukF-PV	Panton-Valentine leukocidin chain F precursor[Staphylococcus aureus subsp. aureus SA957]	NC_022442.1	1533880	1534857	BA000033.2	1e-07	1530290	1530320	31
ATCAACTTCACTGGATAGGTAATAATTATAA	17.889	84	98	1571580	4e-09	842	872	31	lukF-PV	Panton-Valentine leukocidin chain F precursor[Staphylococcus aureus subsp. aureus SA957]	NC_022442.1	1533880	1534857	BA000033.2	1e-07	1529517	1529487	31
ATCAATTATGTCCTTTCACTTTAATTTCATG	17.889	84	98	1572452	1e-08	939	910	30	NA	NA	NA	NA	NA	BA000033.2	1e-07	1530359	1530389	31
ATCAATTCAAAGACTACTTATTACAATTACA	17.889	84	98	1573118	4e-09	244	274	31	lukS-PV	Panton-Valentine leukocidin chain S precursor[Staphylococcus aureus subsp. aureus SA957]	NC_022442.1	1534859	1535797	AY954956.1	1e-07	24332	24362	31
ATCAATTGCATTGCTTTTGCTATCCAATACA	17.889	84	98	1572389	4e-09	33	63	31	lukF-PV	Panton-Valentine leukocidin chain F precursor[Staphylococcus aureus subsp. aureus SA957]	NC_022442.1	1533880	1534857	BA000033.2	1e-07	1530326	1530296	31
ATCAATTTATGAAGTTGATTGGGAAAATCAT	17.889	84	98	1571525	4e-09	897	927	31	lukF-PV	Panton-Valentine leukocidin chain F precursor[Staphylococcus aureus subsp. aureus SA957]	NC_022442.1	1533880	1534857	BA000033.2	1e-07	1529462	1529432	31
ATCACAAAATGCCAGTGTTATCCAGAGGTAA	17.889	84	98	1571721	4e-09	701	731	31	lukF-PV	Panton-Valentine leukocidin chain F precursor[Staphylococcus aureus subsp. aureus SA957]	NC_022442.1	1533880	1534857	BA000033.2	1e-07	1529658	1529628	31
ATCACACCTGTAAGTGAGAAAAAGGTTGATG	17.889	84	98	1572340	4e-09	82	112	31	lukF-PV	Panton-Valentine leukocidin chain F precursor[Staphylococcus aureus subsp. aureus SA957]	NC_022442.1	1533880	1534857	BA000033.2	1e-07	1530277	1530247	31
ATCACATCATTAGGTAAAATGTCTGGACATG	17.889	84	98	1572788	4e-09	574	604	31	lukS-PV	Panton-Valentine leukocidin chain S precursor[Staphylococcus aureus subsp. aureus SA957]	NC_022442.1	1534859	1535797	BA000033.2	1e-07	1530725	1530695	31
ATCACCAATATTCTCAATATTGTTATCAGCT	17.889	84	98	1573281	4e-09	111	81	31	lukS-PV	Panton-Valentine leukocidin chain S precursor[Staphylococcus aureus subsp. aureus SA957]	NC_022442.1	1534859	1535797	AY954956.1	1e-07	24199	24169	31
ATCACTCCTATTGCTACTTCGTTTCATGAAT	17.889	84	98	1573316	4e-09	46	76	31	lukS-PV	Panton-Valentine leukocidin chain S precursor[Staphylococcus aureus subsp. aureus SA957]	NC_022442.1	1534859	1535797	AY954956.1	1e-07	24134	24164	31
ATCAGATTCCGATAAGTTAAAAATTTCTCAG	17.889	84	98	1572278	4e-09	144	174	31	lukF-PV	Panton-Valentine leukocidin chain F precursor[Staphylococcus aureus subsp. aureus SA957]	NC_022442.1	1533880	1534857	BA000033.2	1e-07	1530215	1530185	31
ATCAGCTTTAGATTCATGAAACGAAGTAGCA	17.889	84	98	1573305	4e-09	87	57	31	lukS-PV	Panton-Valentine leukocidin chain S precursor[Staphylococcus aureus subsp. aureus SA957]	NC_022442.1	1534859	1535797	AY954956.1	1e-07	24175	24145	31
ATCAGTTGTTACATCAATTGCATTGCTTTTG	17.889	84	98	1572401	4e-09	21	51	31	lukF-PV	Panton-Valentine leukocidin chain F precursor[Staphylococcus aureus subsp. aureus SA957]	NC_022442.1	1533880	1534857	BA000033.2	1e-07	1530338	1530308	31
ATCATAACTTTTATCTTTAATAAAATTAAAA	17.889	84	98	1572239	4e-09	213	183	31	lukF-PV	Panton-Valentine leukocidin chain F precursor[Staphylococcus aureus subsp. aureus SA957]	NC_022442.1	1533880	1534857	BA000033.2	1e-07	1530146	1530176	31
ATCATACAGTTAAATTAATAGATACTCAATC	17.889	84	98	1571499	4e-09	923	953	31	lukF-PV	Panton-Valentine leukocidin chain F precursor[Staphylococcus aureus subsp. aureus SA957]	NC_022442.1	1533880	1534857	BA000033.2	1e-07	1529436	1529406	31
ATCATATAAAAGCAATGAGGTGGCCTTTCCA	17.889	84	98	1573078	4e-09	284	314	31	lukS-PV	Panton-Valentine leukocidin chain S precursor[Staphylococcus aureus subsp. aureus SA957]	NC_022442.1	1534859	1535797	AY954956.1	1e-07	24372	24402	31
ATCATCAACCTTTTTCTCACTTACAGGTGTG	17.889	84	98	1572338	4e-09	114	84	31	lukF-PV	Panton-Valentine leukocidin chain F precursor[Staphylococcus aureus subsp. aureus SA957]	NC_022442.1	1533880	1534857	BA000033.2	1e-07	1530245	1530275	31
ATCATGTCCAGACATTTTACCTAATGATGTG	17.889	84	98	1572786	4e-09	606	576	31	lukS-PV	Panton-Valentine leukocidin chain S precursor[Staphylococcus aureus subsp. aureus SA957]	NC_022442.1	1534859	1535797	BA000033.2	1e-07	1530693	1530723	31
ATCATTAGGTAAAATGTCTGGACATGATCCA	17.889	84	98	1572783	4e-09	579	609	31	lukS-PV	Panton-Valentine leukocidin chain S precursor[Staphylococcus aureus subsp. aureus SA957]	NC_022442.1	1534859	1535797	BA000033.2	1e-07	1530720	1530690	31
ATCCAAAAGACACTATTAGTTCTCAATTTTA	17.889	84	98	1572150	4e-09	272	302	31	lukF-PV	Panton-Valentine leukocidin chain F precursor[Staphylococcus aureus subsp. aureus SA957]	NC_022442.1	1533880	1534857	BA000033.2	1e-07	1530087	1530057	31
ATCCAAATTTATTTGTTGGATATAAACCATA	17.889	84	98	1572757	4e-09	605	635	31	lukS-PV	Panton-Valentine leukocidin chain S precursor[Staphylococcus aureus subsp. aureus SA957]	NC_022442.1	1534859	1535797	BA000033.2	1e-07	1530694	1530664	31
ATCCAACAAATAAATTTGGATCATGTCCAGA	17.889	84	98	1572767	4e-09	625	595	31	lukS-PV	Panton-Valentine leukocidin chain S precursor[Staphylococcus aureus subsp. aureus SA957]	NC_022442.1	1534859	1535797	BA000033.2	1e-07	1530674	1530704	31
ATCCAATACAGTTGATGCAGCTCAACATATC	17.889	84	98	1572368	4e-09	54	84	31	lukF-PV	Panton-Valentine leukocidin chain F precursor[Staphylococcus aureus subsp. aureus SA957]	NC_022442.1	1533880	1534857	BA000033.2	1e-07	1530305	1530275	31
ATCCAGAATTTATTGGTGTCCTATCTCGAAA	17.889	84	98	1571685	4e-09	737	767	31	lukF-PV	Panton-Valentine leukocidin chain F precursor[Staphylococcus aureus subsp. aureus SA957]	NC_022442.1	1533880	1534857	BA000033.2	1e-07	1529622	1529592	31
ATCCATATTTCTGCCATACGTTATTTCAAAT	17.889	84	98	1572603	4e-09	789	759	31	lukS-PV	Panton-Valentine leukocidin chain S precursor[Staphylococcus aureus subsp. aureus SA957]	NC_022442.1	1534859	1535797	BA000033.2	1e-07	1530510	1530540	31
ATCCTATGAGCTAAACAGATAGATAATCAAA	17.889	84	98	1571457	0.0004	966	987	22	SAAG_02096	panton-Valentine leukocidin chain F protein[Staphylococcus aureus subsp. aureus 55/2053]	NC_022113.1	1460399	1461385	BA000033.2	1e-07	1529394	1529364	31
ATCCTTCATTTATTGCAACTGTTTCTCATGA	17.889	84	98	1572658	4e-09	704	734	31	lukS-PV	Panton-Valentine leukocidin chain S precursor[Staphylococcus aureus subsp. aureus SA957]	NC_022442.1	1534859	1535797	BA000033.2	1e-07	1530595	1530565	31
ATCTAAGCTAGTTCTATAGCTTTCTTGTTTA	17.889	84	98	1571918	4e-09	534	504	31	lukF-PV	Panton-Valentine leukocidin chain F precursor[Staphylococcus aureus subsp. aureus SA957]	NC_022442.1	1533880	1534857	BA000033.2	1e-07	1529825	1529855	31
ATCTAAGGAAAAAAATCCTATGAGCTAAACA	17.889	84	98	1571471	2e-07	951	978	28	lukF-PV	Panton-Valentine leukocidin chain F precursor[Staphylococcus aureus subsp. aureus SA957]	NC_022442.1	1533880	1534857	BA000033.2	1e-07	1529408	1529378	31
ATCTACAACGTTTACTGAGTCATTAGAATCT	17.889	84	98	1572086	4e-09	366	336	31	lukF-PV	Panton-Valentine leukocidin chain F precursor[Staphylococcus aureus subsp. aureus SA957]	NC_022442.1	1533880	1534857	BA000033.2	1e-07	1529993	1530023	31
ATCTAGAATACACAACGCATTTGTAAACAGA	17.889	84	98	1572519	4e-09	843	873	31	lukS-PV	Panton-Valentine leukocidin chain S precursor[Staphylococcus aureus subsp. aureus SA957]	NC_022442.1	1534859	1535797	BA000033.2	1e-07	1530456	1530426	31
ATCTATCTGTTTAGCTCATAGGATTTTTTTC	17.889	84	98	1571464	2e-07	987	960	28	NA	NA	NA	NA	NA	BA000033.2	1e-07	1529371	1529401	31
ATCTATTAATTTAACTGTATGATTTTCCCAA	17.889	84	98	1571507	4e-09	945	915	31	lukF-PV	Panton-Valentine leukocidin chain F precursor[Staphylococcus aureus subsp. aureus SA957]	NC_022442.1	1533880	1534857	BA000033.2	1e-07	1529414	1529444	31
ATCTCTGCCATATGGTCCCCAACCATTATTC	17.889	84	98	1571834	4e-09	618	588	31	lukF-PV	Panton-Valentine leukocidin chain F precursor[Staphylococcus aureus subsp. aureus SA957]	NC_022442.1	1533880	1534857	AB044554.1	1e-07	41829	41799	31
ATCTGAATTAATTGAAATGTTGTACTTAGAA	17.889	84	98	1572113	4e-09	339	309	31	lukF-PV	Panton-Valentine leukocidin chain F precursor[Staphylococcus aureus subsp. aureus SA957]	NC_022442.1	1533880	1534857	BA000033.2	1e-07	1530020	1530050	31
ATCTGAGAAATTTTTAACTTATCGGAATCTG	17.889	84	98	1572276	4e-09	176	146	31	lukF-PV	Panton-Valentine leukocidin chain F precursor[Staphylococcus aureus subsp. aureus SA957]	NC_022442.1	1533880	1534857	BA000033.2	1e-07	1530183	1530213	31
ATCTGTGTTTTTGTAATTGTAATAAGTAGTC	17.889	84	98	1573107	4e-09	285	255	31	lukS-PV	Panton-Valentine leukocidin chain S precursor[Staphylococcus aureus subsp. aureus SA957]	NC_022442.1	1534859	1535797	AY954956.1	1e-07	24373	24343	31
ATCTGTTTAGCTCATAGGATTTTTTTCCTTA	17.889	84	98	1571468	2e-07	985	954	32	SAAG_02096	panton-Valentine leukocidin chain F protein[Staphylococcus aureus subsp. aureus 55/2053]	NC_022113.1	1460399	1461385	BA000033.2	1e-07	1529375	1529405	31
ATCTTCTGTTCTTTTGACTACCTCAGCGCCA	17.889	84	98	1573251	4e-09	141	111	31	lukS-PV	Panton-Valentine leukocidin chain S precursor[Staphylococcus aureus subsp. aureus SA957]	NC_022442.1	1534859	1535797	AY954956.1	1e-07	24229	24199	31
ATCTTTAATAAAATTAAAAGTTAAAATCTGA	17.889	84	98	1572251	4e-09	201	171	31	lukF-PV	Panton-Valentine leukocidin chain F precursor[Staphylococcus aureus subsp. aureus SA957]	NC_022442.1	1533880	1534857	BA000033.2	1e-07	1530158	1530188	31
ATCTTTATCATAACTTTTATCTTTAATAAAA	17.889	84	98	1572233	4e-09	219	189	31	lukF-PV	Panton-Valentine leukocidin chain F precursor[Staphylococcus aureus subsp. aureus SA957]	NC_022442.1	1533880	1534857	BA000033.2	1e-07	1530140	1530170	31
ATCTTTTTCAGAGACAATTAACTATAAACAA	17.889	84	98	1571942	4e-09	480	510	31	lukF-PV	Panton-Valentine leukocidin chain F precursor[Staphylococcus aureus subsp. aureus SA957]	NC_022442.1	1533880	1534857	BA000033.2	1e-07	1529879	1529849	31
ATGAAAAAAATAGTCAAATCATCAGTTGTTA	17.889	84	98	1572421	4e-09	1	31	31	lukF-PV	Panton-Valentine leukocidin chain F precursor[Staphylococcus aureus subsp. aureus SA957]	NC_022442.1	1533880	1534857	BA000033.2	1e-07	1530358	1530328	31
ATGAAATGTTTTTAGGCTCAAGACAAAGCAA	17.889	84	98	1571781	4e-09	641	671	31	lukF-PV	Panton-Valentine leukocidin chain F precursor[Staphylococcus aureus subsp. aureus SA957]	NC_022442.1	1533880	1534857	BA000033.2	1e-07	1529718	1529688	31
ATGAAATTAAAGTGAAAGGACATAATTGATA	17.889	84	98	1572451	5e-08	911	939	29	lukS-PV	Panton-Valentine leukocidin chain S precursor[Staphylococcus aureus subsp. aureus SA957]	NC_022442.1	1534859	1535797	BA000033.2	1e-07	1530388	1530358	31
ATGAACCATTACCTCCTGTTGATGGACCACT	17.889	84	98	1572923	4e-09	469	439	31	lukS-PV	Panton-Valentine leukocidin chain S precursor[Staphylococcus aureus subsp. aureus SA957]	NC_022442.1	1534859	1535797	AY954956.1	1e-07	24557	24527	31
ATGAAGAATTTCAAGTACAACAAACGGTAGG	17.889	84	98	1572036	4e-09	386	416	31	lukF-PV	Panton-Valentine leukocidin chain F precursor[Staphylococcus aureus subsp. aureus SA957]	NC_022442.1	1533880	1534857	BA000033.2	1e-07	1529973	1529943	31
ATGAAGGATTGAAACCACTGTGTACTAATGG	17.889	84	98	1572680	4e-09	712	682	31	lukS-PV	Panton-Valentine leukocidin chain S precursor[Staphylococcus aureus subsp. aureus SA957]	NC_022442.1	1534859	1535797	BA000033.2	1e-07	1530587	1530617	31
ATGAAGTGAACTGGAAAACTCATGAAATTAA	17.889	84	98	1572472	4e-09	890	920	31	lukS-PV	Panton-Valentine leukocidin chain S precursor[Staphylococcus aureus subsp. aureus SA957]	NC_022442.1	1534859	1535797	BA000033.2	1e-07	1530409	1530379	31
ATGAAGTTGATTGGGAAAATCATACAGTTAA	17.889	84	98	1571517	4e-09	905	935	31	lukF-PV	Panton-Valentine leukocidin chain F precursor[Staphylococcus aureus subsp. aureus SA957]	NC_022442.1	1533880	1534857	BA000033.2	1e-07	1529454	1529424	31
ATGAATAATGGTTGGGGACCATATGGCAGAG	17.889	84	98	1571836	4e-09	586	616	31	lukF-PV	Panton-Valentine leukocidin chain F precursor[Staphylococcus aureus subsp. aureus SA957]	NC_022442.1	1533880	1534857	AB044554.1	1e-07	41797	41827	31
ATGAATCTAAAGCTGATAACAATATTGAGAA	17.889	84	98	1573291	4e-09	71	101	31	lukS-PV	Panton-Valentine leukocidin chain S precursor[Staphylococcus aureus subsp. aureus SA957]	NC_022442.1	1534859	1535797	AY954956.1	1e-07	24159	24189	31
ATGAATTAGCTTTTATTCCCCATTGAACACT	17.889	84	98	1572821	4e-09	571	541	31	lukS-PV	Panton-Valentine leukocidin chain S precursor[Staphylococcus aureus subsp. aureus SA957]	NC_022442.1	1534859	1535797	BA000033.2	1e-07	1530728	1530758	31
ATGACTCAGTAAACGTTGTAGATTATGCACC	17.889	84	98	1572078	4e-09	344	374	31	lukF-PV	Panton-Valentine leukocidin chain F precursor[Staphylococcus aureus subsp. aureus SA957]	NC_022442.1	1533880	1534857	BA000033.2	1e-07	1530015	1529985	31
ATGAGAAACAGTTGCAATAAATGAAGGATTG	17.889	84	98	1572660	4e-09	732	702	31	lukS-PV	Panton-Valentine leukocidin chain S precursor[Staphylococcus aureus subsp. aureus SA957]	NC_022442.1	1534859	1535797	BA000033.2	1e-07	1530567	1530597	31
ATGAGCTAAACAGATAGATAATCAAAAAATC	17.889	84	98	1571452	0.22	971	987	17	SAAG_02096	panton-Valentine leukocidin chain F protein[Staphylococcus aureus subsp. aureus 55/2053]	NC_022113.1	1460399	1461385	BA000033.2	1e-07	1529389	1529359	31
ATGAGGTGGCCTTTCCAATACAATATTGGTC	17.889	84	98	1573064	4e-09	298	328	31	lukS-PV	Panton-Valentine leukocidin chain S precursor[Staphylococcus aureus subsp. aureus SA957]	NC_022442.1	1534859	1535797	AY954956.1	1e-07	24386	24416	31
ATGAGTTGCTCTATTTTCATCTTTATAATTA	17.889	84	98	1571558	4e-09	894	864	31	lukF-PV	Panton-Valentine leukocidin chain F precursor[Staphylococcus aureus subsp. aureus SA957]	NC_022442.1	1533880	1534857	BA000033.2	1e-07	1529465	1529495	31
ATGAGTTTTCCAGTTCACTTCATATTTAACT	17.889	84	98	1572480	4e-09	912	882	31	lukS-PV	Panton-Valentine leukocidin chain S precursor[Staphylococcus aureus subsp. aureus SA957]	NC_022442.1	1534859	1535797	BA000033.2	1e-07	1530387	1530417	31
ATGATAAAGATACATTAATACTCAAAGCTGC	17.889	84	98	1572213	4e-09	209	239	31	lukF-PV	Panton-Valentine leukocidin chain F precursor[Staphylococcus aureus subsp. aureus SA957]	NC_022442.1	1533880	1534857	BA000033.2	1e-07	1530150	1530120	31
ATGATAACTATCTCTGCCATATGGTCCCCAA	17.889	84	98	1571825	4e-09	627	597	31	lukF-PV	Panton-Valentine leukocidin chain F precursor[Staphylococcus aureus subsp. aureus SA957]	NC_022442.1	1533880	1534857	BA000033.2	1e-07	1529732	1529762	31
ATGATCCAAATTTATTTGTTGGATATAAACC	17.889	84	98	1572760	4e-09	602	632	31	lukS-PV	Panton-Valentine leukocidin chain S precursor[Staphylococcus aureus subsp. aureus SA957]	NC_022442.1	1534859	1535797	BA000033.2	1e-07	1530697	1530667	31
ATGATCTGTGTTTTTGTAATTGTAATAAGTA	17.889	84	98	1573104	4e-09	288	258	31	lukS-PV	Panton-Valentine leukocidin chain S precursor[Staphylococcus aureus subsp. aureus SA957]	NC_022442.1	1534859	1535797	AY954956.1	1e-07	24376	24346	31
ATGATGTGATAAATGAATTAGCTTTTATTCC	17.889	84	98	1572809	4e-09	583	553	31	lukS-PV	Panton-Valentine leukocidin chain S precursor[Staphylococcus aureus subsp. aureus SA957]	NC_022442.1	1534859	1535797	BA000033.2	1e-07	1530716	1530746	31
ATGCAATTGATGTAACAACTGATGATTTGAC	17.889	84	98	1572409	4e-09	43	13	31	lukF-PV	Panton-Valentine leukocidin chain F precursor[Staphylococcus aureus subsp. aureus SA957]	NC_022442.1	1533880	1534857	BA000033.2	1e-07	1530316	1530346	31
ATGCAGCTCAACATATCACACCTGTAAGTGA	17.889	84	98	1572354	4e-09	68	98	31	lukF-PV	Panton-Valentine leukocidin chain F precursor[Staphylococcus aureus subsp. aureus SA957]	NC_022442.1	1533880	1534857	BA000033.2	1e-07	1530291	1530261	31
ATGCCAGTGTTATCCAGAGGTAACTTCAATC	17.889	84	98	1571713	4e-09	709	739	31	lukF-PV	Panton-Valentine leukocidin chain F precursor[Staphylococcus aureus subsp. aureus SA957]	NC_022442.1	1533880	1534857	BA000033.2	1e-07	1529650	1529620	31
ATGCGTTGTGTATTCTAGATCCTTCTAAATA	17.889	84	98	1572530	4e-09	862	832	31	lukS-PV	Panton-Valentine leukocidin chain S precursor[Staphylococcus aureus subsp. aureus SA957]	NC_022442.1	1534859	1535797	BA000033.2	1e-07	1530437	1530467	31
ATGCTACTAGAAGAACAACACACTATGGCAA	17.889	84	98	1572565	4e-09	797	827	31	lukS-PV	Panton-Valentine leukocidin chain S precursor[Staphylococcus aureus subsp. aureus SA957]	NC_022442.1	1534859	1535797	BA000033.2	1e-07	1530502	1530472	31
ATGCTGGACAAAACTTCTTGGAATATCACAA	17.889	84	98	1571745	4e-09	677	707	31	lukF-PV	Panton-Valentine leukocidin chain F precursor[Staphylococcus aureus subsp. aureus SA957]	NC_022442.1	1533880	1534857	BA000033.2	1e-07	1529682	1529652	31
ATGGATAGATATACAAACTTTTGGAATCAAC	17.889	84	98	1571605	4e-09	817	847	31	lukF-PV	Panton-Valentine leukocidin chain F precursor[Staphylococcus aureus subsp. aureus SA957]	NC_022442.1	1533880	1534857	BA000033.2	1e-07	1529542	1529512	31
ATGGATGTTACTCATGCTACTAGAAGAACAA	17.889	84	98	1572578	4e-09	784	814	31	lukS-PV	Panton-Valentine leukocidin chain S precursor[Staphylococcus aureus subsp. aureus SA957]	NC_022442.1	1534859	1535797	BA000033.2	1e-07	1530515	1530485	31
ATGGCAGAAATATGGATGTTACTCATGCTAC	17.889	84	98	1572589	4e-09	773	803	31	lukS-PV	Panton-Valentine leukocidin chain S precursor[Staphylococcus aureus subsp. aureus SA957]	NC_022442.1	1534859	1535797	BA000033.2	1e-07	1530526	1530496	31
ATGGCAGAGATAGTTATCATTCAACTTATGG	17.889	84	98	1571814	4e-09	608	638	31	lukF-PV	Panton-Valentine leukocidin chain F precursor[Staphylococcus aureus subsp. aureus SA957]	NC_022442.1	1533880	1534857	BA000033.2	1e-07	1529751	1529721	31
ATGGCGCTGAGGTAGTCAAAAGAACAGAAGA	17.889	84	98	1573252	4e-09	110	140	31	lukS-PV	Panton-Valentine leukocidin chain S precursor[Staphylococcus aureus subsp. aureus SA957]	NC_022442.1	1534859	1535797	AY954956.1	1e-07	24198	24228	31
ATGGGGAATAAAAGCTAATTCATTTATCACA	17.889	84	98	1572813	4e-09	549	579	31	lukS-PV	Panton-Valentine leukocidin chain S precursor[Staphylococcus aureus subsp. aureus SA957]	NC_022442.1	1534859	1535797	BA000033.2	1e-07	1530750	1530720	31
ATGGTAATGAAATGTTTTTAGGCTCAAGACA	17.889	84	98	1571787	4e-09	635	665	31	lukF-PV	Panton-Valentine leukocidin chain F precursor[Staphylococcus aureus subsp. aureus SA957]	NC_022442.1	1533880	1534857	BA000033.2	1e-07	1529724	1529694	31
ATGGTTCAAAATCTTTTTCAGAGACAATTAA	17.889	84	98	1571952	4e-09	470	500	31	lukF-PV	Panton-Valentine leukocidin chain F precursor[Staphylococcus aureus subsp. aureus SA957]	NC_022442.1	1533880	1534857	BA000033.2	1e-07	1529889	1529859	31
ATGGTTCATTTAATTATTCAAAAACAATTAG	17.889	84	98	1572901	4e-09	461	491	31	lukS-PV	Panton-Valentine leukocidin chain S precursor[Staphylococcus aureus subsp. aureus SA957]	NC_022442.1	1534859	1535797	AY954956.1	1e-07	24549	24579	31
ATGGTTGGGGACCATATGGCAGAGATAGTTA	17.889	84	98	1571829	4e-09	593	623	31	lukF-PV	Panton-Valentine leukocidin chain F precursor[Staphylococcus aureus subsp. aureus SA957]	NC_022442.1	1533880	1534857	BA000033.2	1e-07	1529766	1529736	31
ATGGTTTATATCCAACAAATAAATTTGGATC	17.889	84	98	1572758	4e-09	634	604	31	lukS-PV	Panton-Valentine leukocidin chain S precursor[Staphylococcus aureus subsp. aureus SA957]	NC_022442.1	1534859	1535797	BA000033.2	1e-07	1530665	1530695	31
ATGTCCAGACATTTTACCTAATGATGTGATA	17.889	84	98	1572789	4e-09	603	573	31	lukS-PV	Panton-Valentine leukocidin chain S precursor[Staphylococcus aureus subsp. aureus SA957]	NC_022442.1	1534859	1535797	BA000033.2	1e-07	1530696	1530726	31
ATGTCCTTTCACTTTAATTTCATGAGTTTTC	17.889	84	98	1572459	4e-09	933	903	31	lukS-PV	Panton-Valentine leukocidin chain S precursor[Staphylococcus aureus subsp. aureus SA957]	NC_022442.1	1534859	1535797	BA000033.2	1e-07	1530366	1530396	31
ATGTCTGGACATGATCCAAATTTATTTGTTG	17.889	84	98	1572770	4e-09	592	622	31	lukS-PV	Panton-Valentine leukocidin chain S precursor[Staphylococcus aureus subsp. aureus SA957]	NC_022442.1	1534859	1535797	BA000033.2	1e-07	1530707	1530677	31
ATGTGATAAATGAATTAGCTTTTATTCCCCA	17.889	84	98	1572812	4e-09	580	550	31	lukS-PV	Panton-Valentine leukocidin chain S precursor[Staphylococcus aureus subsp. aureus SA957]	NC_022442.1	1534859	1535797	BA000033.2	1e-07	1530719	1530749	31
ATGTGCTTCAACATCCCAACCAATTTTTTTG	17.889	84	98	1571873	4e-09	579	549	31	lukF-PV	Panton-Valentine leukocidin chain F precursor[Staphylococcus aureus subsp. aureus SA957]	NC_022442.1	1533880	1534857	BA000033.2	1e-07	1529780	1529810	31
ATGTTACTCATGCTACTAGAAGAACAACACA	17.889	84	98	1572574	4e-09	788	818	31	lukS-PV	Panton-Valentine leukocidin chain S precursor[Staphylococcus aureus subsp. aureus SA957]	NC_022442.1	1534859	1535797	BA000033.2	1e-07	1530511	1530481	31
ATGTTAGTCAAACATTAGGTTATAACATAGG	17.889	84	98	1572967	4e-09	395	425	31	lukS-PV	Panton-Valentine leukocidin chain S precursor[Staphylococcus aureus subsp. aureus SA957]	NC_022442.1	1534859	1535797	AY954956.1	1e-07	24483	24513	31
ATGTTATAACCTAATGTTTGACTAACATTTA	17.889	84	98	1572970	4e-09	422	392	31	lukS-PV	Panton-Valentine leukocidin chain S precursor[Staphylococcus aureus subsp. aureus SA957]	NC_022442.1	1534859	1535797	AY954956.1	1e-07	24510	24480	31
ATGTTGAGCTGCATCAACTGTATTGGATAGC	17.889	84	98	1572371	4e-09	81	51	31	lukF-PV	Panton-Valentine leukocidin chain F precursor[Staphylococcus aureus subsp. aureus SA957]	NC_022442.1	1533880	1534857	BA000033.2	1e-07	1530278	1530308	31
ATGTTGTACTTAGAACCCCAATAAAATTGAG	17.889	84	98	1572129	4e-09	323	293	31	lukF-PV	Panton-Valentine leukocidin chain F precursor[Staphylococcus aureus subsp. aureus SA957]	NC_022442.1	1533880	1534857	BA000033.2	1e-07	1530036	1530066	31
ATGTTTTTAGGCTCAAGACAAAGCAACTTAA	17.889	84	98	1571776	4e-09	646	676	31	lukF-PV	Panton-Valentine leukocidin chain F precursor[Staphylococcus aureus subsp. aureus SA957]	NC_022442.1	1533880	1534857	BA000033.2	1e-07	1529713	1529683	31
ATTAAAAGTTAAAATCTGAGAAATTTTTAAC	17.889	84	98	1572263	4e-09	189	159	31	lukF-PV	Panton-Valentine leukocidin chain F precursor[Staphylococcus aureus subsp. aureus SA957]	NC_022442.1	1533880	1534857	BA000033.2	1e-07	1530170	1530200	31
ATTAAAATTACCACCTATGTTATAACCTAAT	17.889	84	98	1572954	4e-09	438	408	31	lukS-PV	Panton-Valentine leukocidin chain S precursor[Staphylococcus aureus subsp. aureus SA957]	NC_022442.1	1534859	1535797	AY954956.1	1e-07	24526	24496	31
ATTAAAGATAAAAGTTATGATAAAGATACAT	17.889	84	98	1572229	4e-09	193	223	31	lukF-PV	Panton-Valentine leukocidin chain F precursor[Staphylococcus aureus subsp. aureus SA957]	NC_022442.1	1533880	1534857	BA000033.2	1e-07	1530166	1530136	31
ATTAAAGTGAAAGGACATAATTGATATGAAA	17.889	84	98	1572446	3e-05	916	939	24	lukS-PV	Panton-Valentine leukocidin chain S precursor[Staphylococcus aureus subsp. aureus SA957]	NC_022442.1	1534859	1535797	BA000033.2	1e-07	1530383	1530353	31
ATTAAATGAACCATTACCTCCTGTTGATGGA	17.889	84	98	1572918	4e-09	474	444	31	lukS-PV	Panton-Valentine leukocidin chain S precursor[Staphylococcus aureus subsp. aureus SA957]	NC_022442.1	1534859	1535797	AY954956.1	1e-07	24562	24532	31
ATTAACTATAAACAAGAAAGCTATAGAACTA	17.889	84	98	1571926	4e-09	496	526	31	lukF-PV	Panton-Valentine leukocidin chain F precursor[Staphylococcus aureus subsp. aureus SA957]	NC_022442.1	1533880	1534857	BA000033.2	1e-07	1529863	1529833	31
ATTAAGACGTGGTTACCCTAATATAGAAAGA	17.889	84	98	1571393	NA	NA	NA	NA	NA	NA	NA	NA	NA	BA000033.2	1e-07	1529300	1529330	31
ATTAATAGATACTCAATCTAAGGAAAAAAAT	17.889	84	98	1571486	4e-09	936	966	31	lukF-PV	Panton-Valentine leukocidin chain F precursor[Staphylococcus aureus subsp. aureus SA957]	NC_022442.1	1533880	1534857	BA000033.2	1e-07	1529423	1529393	31
ATTAATATCTCCACCATAAGAATAACCTACC	17.889	84	98	1572011	4e-09	441	411	31	lukF-PV	Panton-Valentine leukocidin chain F precursor[Staphylococcus aureus subsp. aureus SA957]	NC_022442.1	1533880	1534857	BA000033.2	1e-07	1529918	1529948	31
ATTAATTCAGATTCTAATGACTCAGTAAACG	17.889	84	98	1572094	4e-09	328	358	31	lukF-PV	Panton-Valentine leukocidin chain F precursor[Staphylococcus aureus subsp. aureus SA957]	NC_022442.1	1533880	1534857	BA000033.2	1e-07	1530031	1530001	31
ATTAATTGAAATGTTGTACTTAGAACCCCAA	17.889	84	98	1572119	4e-09	333	303	31	lukF-PV	Panton-Valentine leukocidin chain F precursor[Staphylococcus aureus subsp. aureus SA957]	NC_022442.1	1533880	1534857	BA000033.2	1e-07	1530026	1530056	31
ATTAATTTAACTGTATGATTTTCCCAATCAA	17.889	84	98	1571511	4e-09	941	911	31	lukF-PV	Panton-Valentine leukocidin chain F precursor[Staphylococcus aureus subsp. aureus SA957]	NC_022442.1	1533880	1534857	BA000033.2	1e-07	1529418	1529448	31
ATTACAAAAACACAGATCATATAAAAGCAAT	17.889	84	98	1573093	4e-09	269	299	31	lukS-PV	Panton-Valentine leukocidin chain S precursor[Staphylococcus aureus subsp. aureus SA957]	NC_022442.1	1534859	1535797	AY954956.1	1e-07	24357	24387	31
ATTACAATTACAAAAACACAGATCATATAAA	17.889	84	98	1573099	4e-09	263	293	31	lukS-PV	Panton-Valentine leukocidin chain S precursor[Staphylococcus aureus subsp. aureus SA957]	NC_022442.1	1534859	1535797	AY954956.1	1e-07	24351	24381	31
ATTACACAGTTAAATATGAAGTGAACTGGAA	17.889	84	98	1572487	4e-09	875	905	31	lukS-PV	Panton-Valentine leukocidin chain S precursor[Staphylococcus aureus subsp. aureus SA957]	NC_022442.1	1534859	1535797	BA000033.2	1e-07	1530424	1530394	31
ATTACCACCTATGTTATAACCTAATGTTTGA	17.889	84	98	1572960	4e-09	432	402	31	lukS-PV	Panton-Valentine leukocidin chain S precursor[Staphylococcus aureus subsp. aureus SA957]	NC_022442.1	1534859	1535797	AY954956.1	1e-07	24520	24490	31
ATTACCATAAGTTGAATGATAACTATCTCTG	17.889	84	98	1571810	4e-09	642	612	31	lukF-PV	Panton-Valentine leukocidin chain F precursor[Staphylococcus aureus subsp. aureus SA957]	NC_022442.1	1533880	1534857	BA000033.2	1e-07	1529717	1529747	31
ATTACCCCCATTAGTACACAGTGGTTTCAAT	17.889	84	98	1572687	4e-09	675	705	31	lukS-PV	Panton-Valentine leukocidin chain S precursor[Staphylococcus aureus subsp. aureus SA957]	NC_022442.1	1534859	1535797	BA000033.2	1e-07	1530624	1530594	31
ATTACCTATCCAGTGAAGTTGATTCCAAAAG	17.889	84	98	1571588	4e-09	864	834	31	lukF-PV	Panton-Valentine leukocidin chain F precursor[Staphylococcus aureus subsp. aureus SA957]	NC_022442.1	1533880	1534857	BA000033.2	1e-07	1529495	1529525	31
ATTACCTCCTGTTGATGGACCACTATTAAAA	17.889	84	98	1572930	4e-09	462	432	31	lukS-PV	Panton-Valentine leukocidin chain S precursor[Staphylococcus aureus subsp. aureus SA957]	NC_022442.1	1534859	1535797	AY954956.1	1e-07	24550	24520	31
ATTACTGTTACTTATCAAAGAGAAATGGATA	17.889	84	98	1571629	4e-09	793	823	31	lukF-PV	Panton-Valentine leukocidin chain F precursor[Staphylococcus aureus subsp. aureus SA957]	NC_022442.1	1533880	1534857	BA000033.2	1e-07	1529566	1529536	31
ATTAGAATCTGAATTAATTGAAATGTTGTAC	17.889	84	98	1572107	4e-09	345	315	31	lukF-PV	Panton-Valentine leukocidin chain F precursor[Staphylococcus aureus subsp. aureus SA957]	NC_022442.1	1533880	1534857	BA000033.2	1e-07	1530014	1530044	31
ATTAGGTAAAATGTCTGGACATGATCCAAAT	17.889	84	98	1572780	4e-09	582	612	31	lukS-PV	Panton-Valentine leukocidin chain S precursor[Staphylococcus aureus subsp. aureus SA957]	NC_022442.1	1534859	1535797	BA000033.2	1e-07	1530717	1530687	31
ATTAGTTATAATCAACAAAACTATATCAGTG	17.889	84	98	1572875	4e-09	487	517	31	lukS-PV	Panton-Valentine leukocidin chain S precursor[Staphylococcus aureus subsp. aureus SA957]	NC_022442.1	1534859	1535797	BA000033.2	1e-07	1530812	1530782	31
ATTAGTTCTTTTATCTAAGCTAGTTCTATAG	17.889	84	98	1571906	4e-09	546	516	31	lukF-PV	Panton-Valentine leukocidin chain F precursor[Staphylococcus aureus subsp. aureus SA957]	NC_022442.1	1533880	1534857	BA000033.2	1e-07	1529813	1529843	31
ATTATAACTAATTGTTTTTGAATAATTAAAT	17.889	84	98	1572894	4e-09	498	468	31	lukS-PV	Panton-Valentine leukocidin chain S precursor[Staphylococcus aureus subsp. aureus SA957]	NC_022442.1	1534859	1535797	AY954956.1	1e-07	24586	24556	31
ATTATTACCTATCCAGTGAAGTTGATTCCAA	17.889	84	98	1571585	4e-09	867	837	31	lukF-PV	Panton-Valentine leukocidin chain F precursor[Staphylococcus aureus subsp. aureus SA957]	NC_022442.1	1533880	1534857	BA000033.2	1e-07	1529492	1529522	31
ATTATTCAAAAACAATTAGTTATAATCAACA	17.889	84	98	1572889	4e-09	473	503	31	lukS-PV	Panton-Valentine leukocidin chain S precursor[Staphylococcus aureus subsp. aureus SA957]	NC_022442.1	1534859	1535797	BA000033.2	1e-07	1530826	1530796	31
ATTCAAAAACAATTAGTTATAATCAACAAAA	17.889	84	98	1572886	4e-09	476	506	31	lukS-PV	Panton-Valentine leukocidin chain S precursor[Staphylococcus aureus subsp. aureus SA957]	NC_022442.1	1534859	1535797	BA000033.2	1e-07	1530823	1530793	31
ATTCAAAAAGTGTTCAATGGGGAATAAAAGC	17.889	84	98	1572829	4e-09	533	563	31	lukS-PV	Panton-Valentine leukocidin chain S precursor[Staphylococcus aureus subsp. aureus SA957]	NC_022442.1	1534859	1535797	BA000033.2	1e-07	1530766	1530736	31
ATTCAAAGACTACTTATTACAATTACAAAAA	17.889	84	98	1573114	4e-09	248	278	31	lukS-PV	Panton-Valentine leukocidin chain S precursor[Staphylococcus aureus subsp. aureus SA957]	NC_022442.1	1534859	1535797	AY954956.1	1e-07	24336	24366	31
ATTCAACTTATGGTAATGAAATGTTTTTAGG	17.889	84	98	1571796	4e-09	626	656	31	lukF-PV	Panton-Valentine leukocidin chain F precursor[Staphylococcus aureus subsp. aureus SA957]	NC_022442.1	1533880	1534857	BA000033.2	1e-07	1529733	1529703	31
ATTCACTTGTATCTCCTGAGCCTTTTTCATG	17.889	84	98	1572632	4e-09	760	730	31	lukS-PV	Panton-Valentine leukocidin chain S precursor[Staphylococcus aureus subsp. aureus SA957]	NC_022442.1	1534859	1535797	BA000033.2	1e-07	1530539	1530569	31
ATTCAGTAAATGTTAGTCAAACATTAGGTTA	17.889	84	98	1572976	4e-09	386	416	31	lukS-PV	Panton-Valentine leukocidin chain S precursor[Staphylococcus aureus subsp. aureus SA957]	NC_022442.1	1534859	1535797	AY954956.1	1e-07	24474	24504	31
ATTCATTTATCACATCATTAGGTAAAATGTC	17.889	84	98	1572796	4e-09	566	596	31	lukS-PV	Panton-Valentine leukocidin chain S precursor[Staphylococcus aureus subsp. aureus SA957]	NC_022442.1	1534859	1535797	BA000033.2	1e-07	1530733	1530703	31
ATTCCAAAAGTTTGTATATCTATCCATTTCT	17.889	84	98	1571609	4e-09	843	813	31	lukF-PV	Panton-Valentine leukocidin chain F precursor[Staphylococcus aureus subsp. aureus SA957]	NC_022442.1	1533880	1534857	BA000033.2	1e-07	1529516	1529546	31
ATTCTAATGACTCAGTAAACGTTGTAGATTA	17.889	84	98	1572084	4e-09	338	368	31	lukF-PV	Panton-Valentine leukocidin chain F precursor[Staphylococcus aureus subsp. aureus SA957]	NC_022442.1	1533880	1534857	BA000033.2	1e-07	1530021	1529991	31
ATTCTAGATCCTTCTAAATAACTATTGCCAT	17.889	84	98	1572541	4e-09	851	821	31	lukS-PV	Panton-Valentine leukocidin chain S precursor[Staphylococcus aureus subsp. aureus SA957]	NC_022442.1	1534859	1535797	BA000033.2	1e-07	1530448	1530478	31
ATTCTCAATATTGTTATCAGCTTTAGATTCA	17.889	84	98	1573290	4e-09	102	72	31	lukS-PV	Panton-Valentine leukocidin chain S precursor[Staphylococcus aureus subsp. aureus SA957]	NC_022442.1	1534859	1535797	AY954956.1	1e-07	24190	24160	31
ATTCTGGATTGAAGTTACCTCTGGATAACAC	17.889	84	98	1571707	4e-09	745	715	31	lukF-PV	Panton-Valentine leukocidin chain F precursor[Staphylococcus aureus subsp. aureus SA957]	NC_022442.1	1533880	1534857	BA000033.2	1e-07	1529614	1529644	31
ATTCTGGCTATACAAAGCCAAATCCAAAAGA	17.889	84	98	1572171	4e-09	251	281	31	lukF-PV	Panton-Valentine leukocidin chain F precursor[Staphylococcus aureus subsp. aureus SA957]	NC_022442.1	1533880	1534857	BA000033.2	1e-07	1530108	1530078	31
ATTCTTATGGTGGAGATATTAATATCTCTAA	17.889	84	98	1572003	4e-09	419	449	31	lukF-PV	Panton-Valentine leukocidin chain F precursor[Staphylococcus aureus subsp. aureus SA957]	NC_022442.1	1533880	1534857	BA000033.2	1e-07	1529940	1529910	31
ATTCTTCATTTTGATTTTTAGGTGCATAATC	17.889	84	98	1572058	4e-09	394	364	31	lukF-PV	Panton-Valentine leukocidin chain F precursor[Staphylococcus aureus subsp. aureus SA957]	NC_022442.1	1533880	1534857	BA000033.2	1e-07	1529965	1529995	31
ATTGAAATGTTGTACTTAGAACCCCAATAAA	17.889	84	98	1572123	4e-09	329	299	31	lukF-PV	Panton-Valentine leukocidin chain F precursor[Staphylococcus aureus subsp. aureus SA957]	NC_022442.1	1533880	1534857	BA000033.2	1e-07	1530030	1530060	31
ATTGAGAACTAATAGTGTCTTTTGGATTTGG	17.889	84	98	1572154	4e-09	298	268	31	lukF-PV	Panton-Valentine leukocidin chain F precursor[Staphylococcus aureus subsp. aureus SA957]	NC_022442.1	1533880	1534857	BA000033.2	1e-07	1530061	1530091	31
ATTGAGAATATTGGTGATGGCGCTGAGGTAG	17.889	84	98	1573268	4e-09	94	124	31	lukS-PV	Panton-Valentine leukocidin chain S precursor[Staphylococcus aureus subsp. aureus SA957]	NC_022442.1	1534859	1535797	AY954956.1	1e-07	24182	24212	31
ATTGATAAAACCTTGCATTTTTAAAATCAAA	17.889	84	98	1573143	4e-09	249	219	31	lukS-PV	Panton-Valentine leukocidin chain S precursor[Staphylococcus aureus subsp. aureus SA957]	NC_022442.1	1534859	1535797	AY954956.1	1e-07	24337	24307	31
ATTGATATGAAAAAAATAGTCAAATCATCAG	17.889	84	98	1572427	8e-06	1	25	25	lukF-PV	Panton-Valentine leukocidin chain F precursor[Staphylococcus aureus subsp. aureus SA957]	NC_022442.1	1533880	1534857	BA000033.2	1e-07	1530364	1530334	31
ATTGCAACTGTTTCTCATGAAAAAGGCTCAG	17.889	84	98	1572647	4e-09	715	745	31	lukS-PV	Panton-Valentine leukocidin chain S precursor[Staphylococcus aureus subsp. aureus SA957]	NC_022442.1	1534859	1535797	BA000033.2	1e-07	1530584	1530554	31
ATTGCATTGCTTTTGCTATCCAATACAGTTG	17.889	84	98	1572385	4e-09	37	67	31	lukF-PV	Panton-Valentine leukocidin chain F precursor[Staphylococcus aureus subsp. aureus SA957]	NC_022442.1	1533880	1534857	BA000033.2	1e-07	1530322	1530292	31
ATTGCCATAGTGTGTTGTTCTTCTAGTAGCA	17.889	84	98	1572564	4e-09	828	798	31	lukS-PV	Panton-Valentine leukocidin chain S precursor[Staphylococcus aureus subsp. aureus SA957]	NC_022442.1	1534859	1535797	BA000033.2	1e-07	1530471	1530501	31
ATTGCTACTTCGTTTCATGAATCTAAAGCTG	17.889	84	98	1573307	4e-09	55	85	31	lukS-PV	Panton-Valentine leukocidin chain S precursor[Staphylococcus aureus subsp. aureus SA957]	NC_022442.1	1534859	1535797	AY954956.1	1e-07	24143	24173	31
ATTGCTTTTGCTATCCAATACAGTTGATGCA	17.889	84	98	1572380	4e-09	42	72	31	lukF-PV	Panton-Valentine leukocidin chain F precursor[Staphylococcus aureus subsp. aureus SA957]	NC_022442.1	1533880	1534857	BA000033.2	1e-07	1530317	1530287	31
ATTGGAAAGGCCACCTCATTGCTTTTATATG	17.889	84	98	1573076	4e-09	316	286	31	lukS-PV	Panton-Valentine leukocidin chain S precursor[Staphylococcus aureus subsp. aureus SA957]	NC_022442.1	1534859	1535797	AY954956.1	1e-07	24404	24374	31
ATTGGATAGCAAAAGCAATGCAATTGATGTA	17.889	84	98	1572392	4e-09	60	30	31	lukF-PV	Panton-Valentine leukocidin chain F precursor[Staphylococcus aureus subsp. aureus SA957]	NC_022442.1	1533880	1534857	BA000033.2	1e-07	1530299	1530329	31
ATTGGGAAAATCATACAGTTAAATTAATAGA	17.889	84	98	1571508	4e-09	914	944	31	lukF-PV	Panton-Valentine leukocidin chain F precursor[Staphylococcus aureus subsp. aureus SA957]	NC_022442.1	1533880	1534857	BA000033.2	1e-07	1529445	1529415	31
ATTGGGGTTCTAAGTACAACATTTCAATTAA	17.889	84	98	1572120	4e-09	302	332	31	lukF-PV	Panton-Valentine leukocidin chain F precursor[Staphylococcus aureus subsp. aureus SA957]	NC_022442.1	1533880	1534857	BA000033.2	1e-07	1530057	1530027	31
ATTGGTGATGGCGCTGAGGTAGTCAAAAGAA	17.889	84	98	1573259	4e-09	103	133	31	lukS-PV	Panton-Valentine leukocidin chain S precursor[Staphylococcus aureus subsp. aureus SA957]	NC_022442.1	1534859	1535797	AY954956.1	1e-07	24191	24221	31
ATTGGTGTCCTATCTCGAAAACAAAACGCTG	17.889	84	98	1571674	4e-09	748	778	31	lukF-PV	Panton-Valentine leukocidin chain F precursor[Staphylococcus aureus subsp. aureus SA957]	NC_022442.1	1533880	1534857	BA000033.2	1e-07	1529611	1529581	31
ATTGTAATAAGTAGTCTTTGAATTGATAAAA	17.889	84	98	1573122	4e-09	270	240	31	lukS-PV	Panton-Valentine leukocidin chain S precursor[Staphylococcus aureus subsp. aureus SA957]	NC_022442.1	1534859	1535797	AY954956.1	1e-07	24358	24328	31
ATTGTCTCTGAAAAAGATTTTGAACCATTAC	17.889	84	98	1571955	4e-09	497	467	31	lukF-PV	Panton-Valentine leukocidin chain F precursor[Staphylococcus aureus subsp. aureus SA957]	NC_022442.1	1533880	1534857	BA000033.2	1e-07	1529862	1529892	31
ATTGTTATCAGCTTTAGATTCATGAAACGAA	17.889	84	98	1573299	4e-09	93	63	31	lukS-PV	Panton-Valentine leukocidin chain S precursor[Staphylococcus aureus subsp. aureus SA957]	NC_022442.1	1534859	1535797	AY954956.1	1e-07	24181	24151	31
ATTGTTTTTGAATAATTAAATGAACCATTAC	17.889	84	98	1572904	4e-09	488	458	31	lukS-PV	Panton-Valentine leukocidin chain S precursor[Staphylococcus aureus subsp. aureus SA957]	NC_022442.1	1534859	1535797	AY954956.1	1e-07	24576	24546	31
ATTTAACTGTATGATTTTCCCAATCAACTTC	17.889	84	98	1571515	4e-09	937	907	31	lukF-PV	Panton-Valentine leukocidin chain F precursor[Staphylococcus aureus subsp. aureus SA957]	NC_022442.1	1533880	1534857	BA000033.2	1e-07	1529422	1529452	31
ATTTAACTGTGTAATTTCTGTTTACAAATGC	17.889	84	98	1572503	4e-09	889	859	31	lukS-PV	Panton-Valentine leukocidin chain S precursor[Staphylococcus aureus subsp. aureus SA957]	NC_022442.1	1534859	1535797	BA000033.2	1e-07	1530410	1530440	31
ATTTAAGATTTTTTGATTATCTATCTGTTTA	17.889	84	98	1571446	0.79	108	126	20	qoxA	quinol oxidase subunit II[Staphylococcus pseudintermedius ED99]	NC_017568.1	1773635	1774735	BA000033.2	1e-07	1529353	1529383	31
ATTTAAGTTGCTTTGTCTTGAGCCTAAAAAC	17.889	84	98	1571774	4e-09	678	648	31	lukF-PV	Panton-Valentine leukocidin chain F precursor[Staphylococcus aureus subsp. aureus SA957]	NC_022442.1	1533880	1534857	BA000033.2	1e-07	1529681	1529711	31
ATTTATCACATCATTAGGTAAAATGTCTGGA	17.889	84	98	1572792	4e-09	570	600	31	lukS-PV	Panton-Valentine leukocidin chain S precursor[Staphylococcus aureus subsp. aureus SA957]	NC_022442.1	1534859	1535797	BA000033.2	1e-07	1530729	1530699	31
ATTTATGAAGTTGATTGGGAAAATCATACAG	17.889	84	98	1571521	4e-09	901	931	31	lukF-PV	Panton-Valentine leukocidin chain F precursor[Staphylococcus aureus subsp. aureus SA957]	NC_022442.1	1533880	1534857	BA000033.2	1e-07	1529458	1529428	31
ATTTATTCTGGCTATACAAAGCCAAATCCAA	17.889	84	98	1572175	4e-09	247	277	31	lukF-PV	Panton-Valentine leukocidin chain F precursor[Staphylococcus aureus subsp. aureus SA957]	NC_022442.1	1533880	1534857	BA000033.2	1e-07	1530112	1530082	31
ATTTATTGCAACTGTTTCTCATGAAAAAGGC	17.889	84	98	1572651	4e-09	711	741	31	lukS-PV	Panton-Valentine leukocidin chain S precursor[Staphylococcus aureus subsp. aureus SA957]	NC_022442.1	1534859	1535797	BA000033.2	1e-07	1530588	1530558	31
ATTTATTGGTGTCCTATCTCGAAAACAAAAC	17.889	84	98	1571678	4e-09	744	774	31	lukF-PV	Panton-Valentine leukocidin chain F precursor[Staphylococcus aureus subsp. aureus SA957]	NC_022442.1	1533880	1534857	BA000033.2	1e-07	1529615	1529585	31
ATTTATTTGTTGGATATAAACCATATAGTCA	17.889	84	98	1572751	4e-09	611	641	31	lukS-PV	Panton-Valentine leukocidin chain S precursor[Staphylococcus aureus subsp. aureus SA957]	NC_022442.1	1534859	1535797	BA000033.2	1e-07	1530688	1530658	31
ATTTCAAAAAAATTGGTTGGGATGTTGAAGC	17.889	84	98	1571877	4e-09	545	575	31	lukF-PV	Panton-Valentine leukocidin chain F precursor[Staphylococcus aureus subsp. aureus SA957]	NC_022442.1	1533880	1534857	BA000033.2	1e-07	1529814	1529784	31
ATTTCAAGTACAACAAACGGTAGGTTATTCT	17.889	84	98	1572029	4e-09	393	423	31	lukF-PV	Panton-Valentine leukocidin chain F precursor[Staphylococcus aureus subsp. aureus SA957]	NC_022442.1	1533880	1534857	BA000033.2	1e-07	1529966	1529936	31
ATTTCAATTAATTCAGATTCTAATGACTCAG	17.889	84	98	1572100	4e-09	322	352	31	lukF-PV	Panton-Valentine leukocidin chain F precursor[Staphylococcus aureus subsp. aureus SA957]	NC_022442.1	1533880	1534857	BA000033.2	1e-07	1530037	1530007	31
ATTTCTCAGATTTTAACTTTTAATTTTATTA	17.889	84	98	1572256	4e-09	166	196	31	lukF-PV	Panton-Valentine leukocidin chain F precursor[Staphylococcus aureus subsp. aureus SA957]	NC_022442.1	1533880	1534857	BA000033.2	1e-07	1530193	1530163	31
ATTTCTGTTTACAAATGCGTTGTGTATTCTA	17.889	84	98	1572516	4e-09	876	846	31	lukS-PV	Panton-Valentine leukocidin chain S precursor[Staphylococcus aureus subsp. aureus SA957]	NC_022442.1	1534859	1535797	BA000033.2	1e-07	1530423	1530453	31
ATTTGACTATTTTTTTCATATCAATTATGTC	17.889	84	98	1572433	0.061	330	357	28	SE1579	DNA polymerase III subunit alpha PolC-type[Staphylococcus epidermidis ATCC 12228]	NC_004461.1	1630940	1631494	BA000033.2	1e-07	1530340	1530370	31
ATTTTAAAAATGCAAGGTTTTATCAATTCAA	17.889	84	98	1573139	4e-09	223	253	31	lukS-PV	Panton-Valentine leukocidin chain S precursor[Staphylococcus aureus subsp. aureus SA957]	NC_022442.1	1534859	1535797	AY954956.1	1e-07	24311	24341	31
ATTTTAACATATTTAAGATTTTTTGATTATC	17.889	84	98	1571436	0.22	1402	1378	28	SLUG_15830	putative cardiolipin synthase[Staphylococcus lugdunensis N920143]	NC_017353.1	1657515	1658996	BA000033.2	1e-07	1529343	1529373	31
ATTTTAACTTTTAATTTTATTAAAGATAAAA	17.889	84	98	1572247	4e-09	175	205	31	lukF-PV	Panton-Valentine leukocidin chain F precursor[Staphylococcus aureus subsp. aureus SA957]	NC_022442.1	1533880	1534857	BA000033.2	1e-07	1530184	1530154	31
ATTTTAATAGTGGTCCATCAACAGGAGGTAA	17.889	84	98	1572931	4e-09	431	461	31	lukS-PV	Panton-Valentine leukocidin chain S precursor[Staphylococcus aureus subsp. aureus SA957]	NC_022442.1	1534859	1535797	AY954956.1	1e-07	24519	24549	31
ATTTTACCTAATGATGTGATAAATGAATTAG	17.889	84	98	1572799	4e-09	593	563	31	lukS-PV	Panton-Valentine leukocidin chain S precursor[Staphylococcus aureus subsp. aureus SA957]	NC_022442.1	1534859	1535797	BA000033.2	1e-07	1530706	1530736	31
ATTTTATCATCAACCTTTTTCTCACTTACAG	17.889	84	98	1572333	4e-09	119	89	31	lukF-PV	Panton-Valentine leukocidin chain F precursor[Staphylococcus aureus subsp. aureus SA957]	NC_022442.1	1533880	1534857	BA000033.2	1e-07	1530240	1530270	31
ATTTTATTAAAGATAAAAGTTATGATAAAGA	17.889	84	98	1572234	4e-09	188	218	31	lukF-PV	Panton-Valentine leukocidin chain F precursor[Staphylococcus aureus subsp. aureus SA957]	NC_022442.1	1533880	1534857	BA000033.2	1e-07	1530171	1530141	31
ATTTTATTGGGGTTCTAAGTACAACATTTCA	17.889	84	98	1572125	4e-09	297	327	31	lukF-PV	Panton-Valentine leukocidin chain F precursor[Staphylococcus aureus subsp. aureus SA957]	NC_022442.1	1533880	1534857	BA000033.2	1e-07	1530062	1530032	31
ATTTTCATCTTTATAATTATTACCTATCCAG	17.889	84	98	1571570	4e-09	882	852	31	lukF-PV	Panton-Valentine leukocidin chain F precursor[Staphylococcus aureus subsp. aureus SA957]	NC_022442.1	1533880	1534857	BA000033.2	1e-07	1529477	1529507	31
ATTTTGACTATATGGTTTATATCCAACAAAT	17.889	84	98	1572747	4e-09	645	615	31	lukS-PV	Panton-Valentine leukocidin chain S precursor[Staphylococcus aureus subsp. aureus SA957]	NC_022442.1	1534859	1535797	BA000033.2	1e-07	1530654	1530684	31
ATTTTGATTTTTAGGTGCATAATCTACAACG	17.889	84	98	1572065	4e-09	387	357	31	lukF-PV	Panton-Valentine leukocidin chain F precursor[Staphylococcus aureus subsp. aureus SA957]	NC_022442.1	1533880	1534857	BA000033.2	1e-07	1529972	1530002	31
ATTTTGTGATATTCCAAGAAGTTTTGTCCAG	17.889	84	98	1571742	4e-09	710	680	31	lukF-PV	Panton-Valentine leukocidin chain F precursor[Staphylococcus aureus subsp. aureus SA957]	NC_022442.1	1533880	1534857	BA000033.2	1e-07	1529649	1529679	31
ATTTTGTTAAAGATAAAAAGTATAACAAAGA	17.889	84	98	1573177	4e-09	185	215	31	lukS-PV	Panton-Valentine leukocidin chain S precursor[Staphylococcus aureus subsp. aureus SA957]	NC_022442.1	1534859	1535797	AY954956.1	1e-07	24273	24303	31
ATTTTTAAAATCAAAGCGTCTTTGTTATACT	17.889	84	98	1573159	4e-09	233	203	31	lukS-PV	Panton-Valentine leukocidin chain S precursor[Staphylococcus aureus subsp. aureus SA957]	NC_022442.1	1534859	1535797	AY954956.1	1e-07	24321	24291	31
ATTTTTAACTTATCGGAATCTGATGTTGCAG	17.889	84	98	1572285	4e-09	167	137	31	lukF-PV	Panton-Valentine leukocidin chain F precursor[Staphylococcus aureus subsp. aureus SA957]	NC_022442.1	1533880	1534857	BA000033.2	1e-07	1530192	1530222	31
ATTTTTAGGTGCATAATCTACAACGTTTACT	17.889	84	98	1572071	4e-09	381	351	31	lukF-PV	Panton-Valentine leukocidin chain F precursor[Staphylococcus aureus subsp. aureus SA957]	NC_022442.1	1533880	1534857	BA000033.2	1e-07	1529978	1530008	31
ATTTTTTGATTATCTATCTGTTTAGCTCATA	17.889	84	98	1571453	0.061	987	970	18	NA	NA	NA	NA	NA	BA000033.2	1e-07	1529360	1529390	31
ATTTTTTTCATATCAATTATGTCCTTTCACT	17.889	84	98	1572441	0.017	939	921	19	NA	NA	NA	NA	NA	BA000033.2	1e-07	1530348	1530378	31
ATTTTTTTGAAATTAGTTCTTTTATCTAAGC	17.889	84	98	1571895	4e-09	557	527	31	lukF-PV	Panton-Valentine leukocidin chain F precursor[Staphylococcus aureus subsp. aureus SA957]	NC_022442.1	1533880	1534857	BA000033.2	1e-07	1529802	1529832	31
ATTTTTTTGCAGCGTTTTGTTTTCGAGATAG	17.889	84	98	1571665	4e-09	787	757	31	lukF-PV	Panton-Valentine leukocidin chain F precursor[Staphylococcus aureus subsp. aureus SA957]	NC_022442.1	1533880	1534857	BA000033.2	1e-07	1529572	1529602	31
CAAAAAATCTTAAATATGTTAAAATTTACAA	17.889	84	98	1571430	0.79	322	349	29	STP1_1377	YycI protein[Staphylococcus pasteuri SP1]	NC_022737.1	1462018	1462809	BA000033.2	1e-07	1529367	1529337	31
CAAAAACAATTAGTTATAATCAACAAAACTA	17.889	84	98	1572883	4e-09	479	509	31	lukS-PV	Panton-Valentine leukocidin chain S precursor[Staphylococcus aureus subsp. aureus SA957]	NC_022442.1	1534859	1535797	BA000033.2	1e-07	1530820	1530790	31
CAAAAACACAGATCATATAAAAGCAATGAGG	17.889	84	98	1573089	4e-09	273	303	31	lukS-PV	Panton-Valentine leukocidin chain S precursor[Staphylococcus aureus subsp. aureus SA957]	NC_022442.1	1534859	1535797	AY954956.1	1e-07	24361	24391	31
CAAAAAGTGTTCAATGGGGAATAAAAGCTAA	17.889	84	98	1572826	4e-09	536	566	31	lukS-PV	Panton-Valentine leukocidin chain S precursor[Staphylococcus aureus subsp. aureus SA957]	NC_022442.1	1534859	1535797	BA000033.2	1e-07	1530763	1530733	31
CAAAACAACTGCAACATCAGATTCCGATAAG	17.889	84	98	1572293	4e-09	129	159	31	lukF-PV	Panton-Valentine leukocidin chain F precursor[Staphylococcus aureus subsp. aureus SA957]	NC_022442.1	1533880	1534857	BA000033.2	1e-07	1530230	1530200	31
CAAAACTTCTTGGAATATCACAAAATGCCAG	17.889	84	98	1571737	4e-09	685	715	31	lukF-PV	Panton-Valentine leukocidin chain F precursor[Staphylococcus aureus subsp. aureus SA957]	NC_022442.1	1533880	1534857	BA000033.2	1e-07	1529674	1529644	31
CAAAAGACACTATTAGTTCTCAATTTTATTG	17.889	84	98	1572147	4e-09	275	305	31	lukF-PV	Panton-Valentine leukocidin chain F precursor[Staphylococcus aureus subsp. aureus SA957]	NC_022442.1	1533880	1534857	BA000033.2	1e-07	1530084	1530054	31
CAAAATAGTCTCTCGGATTTTGACTATATGG	17.889	84	98	1572731	4e-09	661	631	31	lukS-PV	Panton-Valentine leukocidin chain S precursor[Staphylococcus aureus subsp. aureus SA957]	NC_022442.1	1534859	1535797	BA000033.2	1e-07	1530638	1530668	31
CAAAATATTCAGTTTGATTTTGTTAAAGATA	17.889	84	98	1573193	4e-09	169	199	31	lukS-PV	Panton-Valentine leukocidin chain S precursor[Staphylococcus aureus subsp. aureus SA957]	NC_022442.1	1534859	1535797	AY954956.1	1e-07	24257	24287	31
CAAAATCAAACTGAATATTTTGTGTGACCCC	17.889	84	98	1573202	4e-09	190	160	31	lukS-PV	Panton-Valentine leukocidin chain S precursor[Staphylococcus aureus subsp. aureus SA957]	NC_022442.1	1534859	1535797	AY954956.1	1e-07	24278	24248	31
CAAAATCTTTTTCAGAGACAATTAACTATAA	17.889	84	98	1571946	4e-09	476	506	31	lukF-PV	Panton-Valentine leukocidin chain F precursor[Staphylococcus aureus subsp. aureus SA957]	NC_022442.1	1533880	1534857	BA000033.2	1e-07	1529883	1529853	31
CAAAATGAAGAATTTCAAGTACAACAAACGG	17.889	84	98	1572040	4e-09	382	412	31	lukF-PV	Panton-Valentine leukocidin chain F precursor[Staphylococcus aureus subsp. aureus SA957]	NC_022442.1	1533880	1534857	BA000033.2	1e-07	1529977	1529947	31
CAAAATGCCAGTGTTATCCAGAGGTAACTTC	17.889	84	98	1571717	4e-09	705	735	31	lukF-PV	Panton-Valentine leukocidin chain F precursor[Staphylococcus aureus subsp. aureus SA957]	NC_022442.1	1533880	1534857	BA000033.2	1e-07	1529654	1529624	31
CAAAATTCAAAAAGTGTTCAATGGGGAATAA	17.889	84	98	1572833	4e-09	529	559	31	lukS-PV	Panton-Valentine leukocidin chain S precursor[Staphylococcus aureus subsp. aureus SA957]	NC_022442.1	1534859	1535797	BA000033.2	1e-07	1530770	1530740	31
CAAACACTTTCTTTCTATATTAGGGTAACCA	17.889	84	98	1571402	0.22	67	47	21	SAZ172_0994	GNAT family acetyltransferase YjcF[Staphylococcus aureus subsp. aureus Z172]	NC_022604.1	1077258	1077692	BA000033.2	1e-07	1529339	1529309	31
CAAACGGTAGGTTATTCTTATGGTGGAGATA	17.889	84	98	1572016	4e-09	406	436	31	lukF-PV	Panton-Valentine leukocidin chain F precursor[Staphylococcus aureus subsp. aureus SA957]	NC_022442.1	1533880	1534857	BA000033.2	1e-07	1529953	1529923	31
CAAACTTTTGGAATCAACTTCACTGGATAGG	17.889	84	98	1571592	4e-09	830	860	31	lukF-PV	Panton-Valentine leukocidin chain F precursor[Staphylococcus aureus subsp. aureus SA957]	NC_022442.1	1533880	1534857	BA000033.2	1e-07	1529529	1529499	31
CAAAGACTACTTATTACAATTACAAAAACAC	17.889	84	98	1573111	4e-09	251	281	31	lukS-PV	Panton-Valentine leukocidin chain S precursor[Staphylococcus aureus subsp. aureus SA957]	NC_022442.1	1534859	1535797	AY954956.1	1e-07	24339	24369	31
CAAAGCCAAATCCAAAAGACACTATTAGTTC	17.889	84	98	1572159	4e-09	263	293	31	lukF-PV	Panton-Valentine leukocidin chain F precursor[Staphylococcus aureus subsp. aureus SA957]	NC_022442.1	1533880	1534857	BA000033.2	1e-07	1530096	1530066	31
CAAAGCGTCTTTGTTATACTTTTTATCTTTA	17.889	84	98	1573170	4e-09	222	192	31	lukS-PV	Panton-Valentine leukocidin chain S precursor[Staphylococcus aureus subsp. aureus SA957]	NC_022442.1	1534859	1535797	AY954956.1	1e-07	24310	24280	31
CAAATCATCAGTTGTTACATCAATTGCATTG	17.889	84	98	1572407	4e-09	15	45	31	lukF-PV	Panton-Valentine leukocidin chain F precursor[Staphylococcus aureus subsp. aureus SA957]	NC_022442.1	1533880	1534857	BA000033.2	1e-07	1530344	1530314	31
CAAATGCGTTGTGTATTCTAGATCCTTCTAA	17.889	84	98	1572527	4e-09	865	835	31	lukS-PV	Panton-Valentine leukocidin chain S precursor[Staphylococcus aureus subsp. aureus SA957]	NC_022442.1	1534859	1535797	BA000033.2	1e-07	1530434	1530464	31
CAAATTCACTTGTATCTCCTGAGCCTTTTTC	17.889	84	98	1572629	4e-09	763	733	31	lukS-PV	Panton-Valentine leukocidin chain S precursor[Staphylococcus aureus subsp. aureus SA957]	NC_022442.1	1534859	1535797	BA000033.2	1e-07	1530536	1530566	31
CAAATTTATTTGTTGGATATAAACCATATAG	17.889	84	98	1572754	4e-09	608	638	31	lukS-PV	Panton-Valentine leukocidin chain S precursor[Staphylococcus aureus subsp. aureus SA957]	NC_022442.1	1534859	1535797	BA000033.2	1e-07	1530691	1530661	31
CAACAAACGGTAGGTTATTCTTATGGTGGAG	17.889	84	98	1572019	4e-09	403	433	31	lukF-PV	Panton-Valentine leukocidin chain F precursor[Staphylococcus aureus subsp. aureus SA957]	NC_022442.1	1533880	1534857	BA000033.2	1e-07	1529956	1529926	31
CAACACACTATGGCAATAGTTATTTAGAAGG	17.889	84	98	1572550	4e-09	812	842	31	lukS-PV	Panton-Valentine leukocidin chain S precursor[Staphylococcus aureus subsp. aureus SA957]	NC_022442.1	1534859	1535797	BA000033.2	1e-07	1530487	1530457	31
CAACAGGAGGTAATGGTTCATTTAATTATTC	17.889	84	98	1572913	4e-09	449	479	31	lukS-PV	Panton-Valentine leukocidin chain S precursor[Staphylococcus aureus subsp. aureus SA957]	NC_022442.1	1534859	1535797	AY954956.1	1e-07	24537	24567	31
CAACATATCACACCTGTAAGTGAGAAAAAGG	17.889	84	98	1572346	4e-09	76	106	31	lukF-PV	Panton-Valentine leukocidin chain F precursor[Staphylococcus aureus subsp. aureus SA957]	NC_022442.1	1533880	1534857	BA000033.2	1e-07	1530283	1530253	31
CAACATCAGATTCCGATAAGTTAAAAATTTC	17.889	84	98	1572282	4e-09	140	170	31	lukF-PV	Panton-Valentine leukocidin chain F precursor[Staphylococcus aureus subsp. aureus SA957]	NC_022442.1	1533880	1534857	BA000033.2	1e-07	1530219	1530189	31
CAACATTTCAATTAATTCAGATTCTAATGAC	17.889	84	98	1572104	4e-09	318	348	31	lukF-PV	Panton-Valentine leukocidin chain F precursor[Staphylococcus aureus subsp. aureus SA957]	NC_022442.1	1533880	1534857	BA000033.2	1e-07	1530041	1530011	31
CAACCTTTTTCTCACTTACAGGTGTGATATG	17.889	84	98	1572343	4e-09	109	79	31	lukF-PV	Panton-Valentine leukocidin chain F precursor[Staphylococcus aureus subsp. aureus SA957]	NC_022442.1	1533880	1534857	BA000033.2	1e-07	1530250	1530280	31
CAACTGATGATTTGACTATTTTTTTCATATC	17.889	84	98	1572424	2e-07	28	1	28	lukF-PV	Panton-Valentine leukocidin chain F precursor[Staphylococcus aureus subsp. aureus SA957]	NC_022442.1	1533880	1534857	BA000033.2	1e-07	1530331	1530361	31
CAACTGCAACATCAGATTCCGATAAGTTAAA	17.889	84	98	1572288	4e-09	134	164	31	lukF-PV	Panton-Valentine leukocidin chain F precursor[Staphylococcus aureus subsp. aureus SA957]	NC_022442.1	1533880	1534857	BA000033.2	1e-07	1530225	1530195	31
CAACTGTTTCTCATGAAAAAGGCTCAGGAGA	17.889	84	98	1572643	4e-09	719	749	31	lukS-PV	Panton-Valentine leukocidin chain S precursor[Staphylococcus aureus subsp. aureus SA957]	NC_022442.1	1534859	1535797	BA000033.2	1e-07	1530580	1530550	31
CAACTTAAATGCTGGACAAAACTTCTTGGAA	17.889	84	98	1571753	4e-09	669	699	31	lukF-PV	Panton-Valentine leukocidin chain F precursor[Staphylococcus aureus subsp. aureus SA957]	NC_022442.1	1533880	1534857	BA000033.2	1e-07	1529690	1529660	31
CAACTTATGGTAATGAAATGTTTTTAGGCTC	17.889	84	98	1571793	4e-09	629	659	31	lukF-PV	Panton-Valentine leukocidin chain F precursor[Staphylococcus aureus subsp. aureus SA957]	NC_022442.1	1533880	1534857	BA000033.2	1e-07	1529730	1529700	31
CAACTTCACTGGATAGGTAATAATTATAAAG	17.889	84	98	1571578	4e-09	844	874	31	lukF-PV	Panton-Valentine leukocidin chain F precursor[Staphylococcus aureus subsp. aureus SA957]	NC_022442.1	1533880	1534857	BA000033.2	1e-07	1529515	1529485	31
CAAGAAAGCTATAGAACTAGCTTAGATAAAA	17.889	84	98	1571914	4e-09	508	538	31	lukF-PV	Panton-Valentine leukocidin chain F precursor[Staphylococcus aureus subsp. aureus SA957]	NC_022442.1	1533880	1534857	BA000033.2	1e-07	1529851	1529821	31
CAAGACAAAGCAACTTAAATGCTGGACAAAA	17.889	84	98	1571763	4e-09	659	689	31	lukF-PV	Panton-Valentine leukocidin chain F precursor[Staphylococcus aureus subsp. aureus SA957]	NC_022442.1	1533880	1534857	BA000033.2	1e-07	1529700	1529670	31
CAAGTACAACAAACGGTAGGTTATTCTTATG	17.889	84	98	1572025	4e-09	397	427	31	lukF-PV	Panton-Valentine leukocidin chain F precursor[Staphylococcus aureus subsp. aureus SA957]	NC_022442.1	1533880	1534857	BA000033.2	1e-07	1529962	1529932	31
CAAGTGAATTTGAAATAACGTATGGCAGAAA	17.889	84	98	1572610	4e-09	752	782	31	lukS-PV	Panton-Valentine leukocidin chain S precursor[Staphylococcus aureus subsp. aureus SA957]	NC_022442.1	1534859	1535797	BA000033.2	1e-07	1530547	1530517	31
CAATAAATGAAGGATTGAAACCACTGTGTAC	17.889	84	98	1572674	4e-09	718	688	31	lukS-PV	Panton-Valentine leukocidin chain S precursor[Staphylococcus aureus subsp. aureus SA957]	NC_022442.1	1534859	1535797	BA000033.2	1e-07	1530581	1530611	31
CAATAAATTCTGGATTGAAGTTACCTCTGGA	17.889	84	98	1571701	4e-09	751	721	31	lukF-PV	Panton-Valentine leukocidin chain F precursor[Staphylococcus aureus subsp. aureus SA957]	NC_022442.1	1533880	1534857	BA000033.2	1e-07	1529608	1529638	31
CAATACAGTTGATGCAGCTCAACATATCACA	17.889	84	98	1572365	4e-09	57	87	31	lukF-PV	Panton-Valentine leukocidin chain F precursor[Staphylococcus aureus subsp. aureus SA957]	NC_022442.1	1533880	1534857	BA000033.2	1e-07	1530302	1530272	31
CAATAGTTATTTAGAAGGATCTAGAATACAC	17.889	84	98	1572537	4e-09	825	855	31	lukS-PV	Panton-Valentine leukocidin chain S precursor[Staphylococcus aureus subsp. aureus SA957]	NC_022442.1	1534859	1535797	BA000033.2	1e-07	1530474	1530444	31
CAATATTCTCAATATTGTTATCAGCTTTAGA	17.889	84	98	1573286	4e-09	106	76	31	lukS-PV	Panton-Valentine leukocidin chain S precursor[Staphylococcus aureus subsp. aureus SA957]	NC_022442.1	1534859	1535797	AY954956.1	1e-07	24194	24164	31
CAATATTGAGAATATTGGTGATGGCGCTGAG	17.889	84	98	1573272	4e-09	90	120	31	lukS-PV	Panton-Valentine leukocidin chain S precursor[Staphylococcus aureus subsp. aureus SA957]	NC_022442.1	1534859	1535797	AY954956.1	1e-07	24178	24208	31
CAATATTGTATTGGAAAGGCCACCTCATTGC	17.889	84	98	1573067	4e-09	325	295	31	lukS-PV	Panton-Valentine leukocidin chain S precursor[Staphylococcus aureus subsp. aureus SA957]	NC_022442.1	1534859	1535797	AY954956.1	1e-07	24413	24383	31
CAATATTGTTATCAGCTTTAGATTCATGAAA	17.889	84	98	1573295	4e-09	97	67	31	lukS-PV	Panton-Valentine leukocidin chain S precursor[Staphylococcus aureus subsp. aureus SA957]	NC_022442.1	1534859	1535797	AY954956.1	1e-07	24185	24155	31
CAATCCAGAATTTATTGGTGTCCTATCTCGA	17.889	84	98	1571687	4e-09	735	765	31	lukF-PV	Panton-Valentine leukocidin chain F precursor[Staphylococcus aureus subsp. aureus SA957]	NC_022442.1	1533880	1534857	BA000033.2	1e-07	1529624	1529594	31
CAATCTAAGGAAAAAAATCCTATGAGCTAAA	17.889	84	98	1571473	1e-08	949	978	30	lukF-PV	Panton-Valentine leukocidin chain F precursor[Staphylococcus aureus subsp. aureus SA957]	NC_022442.1	1533880	1534857	BA000033.2	1e-07	1529410	1529380	31
CAATGAGGTGGCCTTTCCAATACAATATTGG	17.889	84	98	1573066	4e-09	296	326	31	lukS-PV	Panton-Valentine leukocidin chain S precursor[Staphylococcus aureus subsp. aureus SA957]	NC_022442.1	1534859	1535797	AY954956.1	1e-07	24384	24414	31
CAATGGGGAATAAAAGCTAATTCATTTATCA	17.889	84	98	1572815	4e-09	547	577	31	lukS-PV	Panton-Valentine leukocidin chain S precursor[Staphylococcus aureus subsp. aureus SA957]	NC_022442.1	1534859	1535797	BA000033.2	1e-07	1530752	1530722	31
CAATTAACTATAAACAAGAAAGCTATAGAAC	17.889	84	98	1571928	4e-09	494	524	31	lukF-PV	Panton-Valentine leukocidin chain F precursor[Staphylococcus aureus subsp. aureus SA957]	NC_022442.1	1533880	1534857	BA000033.2	1e-07	1529865	1529835	31
CAATTAAGACGTGGTTACCCTAATATAGAAA	17.889	84	98	1571391	0.79	173	188	16	MS7_0645	pyridine nucleotide-disulfide oxidoreductase family protein[Staphylococcus aureus subsp. aureus 11819-97]	NC_017351.1	686824	687024	BA000033.2	1e-07	1529298	1529328	31
CAATTAATTCAGATTCTAATGACTCAGTAAA	17.889	84	98	1572096	4e-09	326	356	31	lukF-PV	Panton-Valentine leukocidin chain F precursor[Staphylococcus aureus subsp. aureus SA957]	NC_022442.1	1533880	1534857	BA000033.2	1e-07	1530033	1530003	31
CAATTACAAAAACACAGATCATATAAAAGCA	17.889	84	98	1573095	4e-09	267	297	31	lukS-PV	Panton-Valentine leukocidin chain S precursor[Staphylococcus aureus subsp. aureus SA957]	NC_022442.1	1534859	1535797	AY954956.1	1e-07	24355	24385	31
CAATTAGTTATAATCAACAAAACTATATCAG	17.889	84	98	1572877	4e-09	485	515	31	lukS-PV	Panton-Valentine leukocidin chain S precursor[Staphylococcus aureus subsp. aureus SA957]	NC_022442.1	1534859	1535797	BA000033.2	1e-07	1530814	1530784	31
CAATTATGTCCTTTCACTTTAATTTCATGAG	17.889	84	98	1572454	4e-09	938	908	31	lukS-PV	Panton-Valentine leukocidin chain S precursor[Staphylococcus aureus subsp. aureus SA957]	NC_022442.1	1534859	1535797	BA000033.2	1e-07	1530361	1530391	31
CAATTCAAAGACTACTTATTACAATTACAAA	17.889	84	98	1573116	4e-09	246	276	31	lukS-PV	Panton-Valentine leukocidin chain S precursor[Staphylococcus aureus subsp. aureus SA957]	NC_022442.1	1534859	1535797	AY954956.1	1e-07	24334	24364	31
CAATTTATGAAGTTGATTGGGAAAATCATAC	17.889	84	98	1571523	4e-09	899	929	31	lukF-PV	Panton-Valentine leukocidin chain F precursor[Staphylococcus aureus subsp. aureus SA957]	NC_022442.1	1533880	1534857	BA000033.2	1e-07	1529460	1529430	31
CAATTTTTTTGAAATTAGTTCTTTTATCTAA	17.889	84	98	1571893	4e-09	559	529	31	lukF-PV	Panton-Valentine leukocidin chain F precursor[Staphylococcus aureus subsp. aureus SA957]	NC_022442.1	1533880	1534857	BA000033.2	1e-07	1529800	1529830	31
CACAAAATATTCAGTTTGATTTTGTTAAAGA	17.889	84	98	1573195	4e-09	167	197	31	lukS-PV	Panton-Valentine leukocidin chain S precursor[Staphylococcus aureus subsp. aureus SA957]	NC_022442.1	1534859	1535797	AY954956.1	1e-07	24255	24285	31
CACAACGCATTTGTAAACAGAAATTACACAG	17.889	84	98	1572509	4e-09	853	883	31	lukS-PV	Panton-Valentine leukocidin chain S precursor[Staphylococcus aureus subsp. aureus SA957]	NC_022442.1	1534859	1535797	BA000033.2	1e-07	1530446	1530416	31
CACACAAAATATTCAGTTTGATTTTGTTAAA	17.889	84	98	1573197	4e-09	165	195	31	lukS-PV	Panton-Valentine leukocidin chain S precursor[Staphylococcus aureus subsp. aureus SA957]	NC_022442.1	1534859	1535797	AY954956.1	1e-07	24253	24283	31
CACACTATGGCAATAGTTATTTAGAAGGATC	17.889	84	98	1572547	4e-09	815	845	31	lukS-PV	Panton-Valentine leukocidin chain S precursor[Staphylococcus aureus subsp. aureus SA957]	NC_022442.1	1534859	1535797	BA000033.2	1e-07	1530484	1530454	31
CACAGTGGTTTCAATCCTTCATTTATTGCAA	17.889	84	98	1572671	4e-09	691	721	31	lukS-PV	Panton-Valentine leukocidin chain S precursor[Staphylococcus aureus subsp. aureus SA957]	NC_022442.1	1534859	1535797	BA000033.2	1e-07	1530608	1530578	31
CACCATAAGAATAACCTACCGTTTGTTGTAC	17.889	84	98	1572022	4e-09	430	400	31	lukF-PV	Panton-Valentine leukocidin chain F precursor[Staphylococcus aureus subsp. aureus SA957]	NC_022442.1	1533880	1534857	BA000033.2	1e-07	1529929	1529959	31
CACCTATGTTATAACCTAATGTTTGACTAAC	17.889	84	98	1572965	4e-09	427	397	31	lukS-PV	Panton-Valentine leukocidin chain S precursor[Staphylococcus aureus subsp. aureus SA957]	NC_022442.1	1534859	1535797	AY954956.1	1e-07	24515	24485	31
CACCTGTAAGTGAGAAAAAGGTTGATGATAA	17.889	84	98	1572336	4e-09	86	116	31	lukF-PV	Panton-Valentine leukocidin chain F precursor[Staphylococcus aureus subsp. aureus SA957]	NC_022442.1	1533880	1534857	BA000033.2	1e-07	1530273	1530243	31
CACTATGGCAATAGTTATTTAGAAGGATCTA	17.889	84	98	1572545	4e-09	817	847	31	lukS-PV	Panton-Valentine leukocidin chain S precursor[Staphylococcus aureus subsp. aureus SA957]	NC_022442.1	1534859	1535797	BA000033.2	1e-07	1530482	1530452	31
CACTATTAAAATTACCACCTATGTTATAACC	17.889	84	98	1572950	4e-09	442	412	31	lukS-PV	Panton-Valentine leukocidin chain S precursor[Staphylococcus aureus subsp. aureus SA957]	NC_022442.1	1534859	1535797	AY954956.1	1e-07	24530	24500	31
CACTGGATAGGTAATAATTATAAAGATGAAA	17.889	84	98	1571572	4e-09	850	880	31	lukF-PV	Panton-Valentine leukocidin chain F precursor[Staphylococcus aureus subsp. aureus SA957]	NC_022442.1	1533880	1534857	BA000033.2	1e-07	1529509	1529479	31
CACTGTGTACTAATGGGGGTAATTCATTGTC	17.889	84	98	1572695	4e-09	697	667	31	lukS-PV	Panton-Valentine leukocidin chain S precursor[Staphylococcus aureus subsp. aureus SA957]	NC_022442.1	1534859	1535797	BA000033.2	1e-07	1530602	1530632	31
CACTTACAGGTGTGATATGTTGAGCTGCATC	17.889	84	98	1572355	4e-09	97	67	31	lukF-PV	Panton-Valentine leukocidin chain F precursor[Staphylococcus aureus subsp. aureus SA957]	NC_022442.1	1533880	1534857	BA000033.2	1e-07	1530262	1530292	31
CACTTGTATCTCCTGAGCCTTTTTCATGAGA	17.889	84	98	1572635	4e-09	757	727	31	lukS-PV	Panton-Valentine leukocidin chain S precursor[Staphylococcus aureus subsp. aureus SA957]	NC_022442.1	1534859	1535797	BA000033.2	1e-07	1530542	1530572	31
CACTTTCTTTCTATATTAGGGTAACCACGTC	17.889	84	98	1571398	NA	NA	NA	NA	NA	NA	NA	NA	NA	BA000033.2	1e-07	1529335	1529305	31
CAGAAATATGGATGTTACTCATGCTACTAGA	17.889	84	98	1572585	4e-09	777	807	31	lukS-PV	Panton-Valentine leukocidin chain S precursor[Staphylococcus aureus subsp. aureus SA957]	NC_022442.1	1534859	1535797	BA000033.2	1e-07	1530522	1530492	31
CAGAAATTACACAGTTAAATATGAAGTGAAC	17.889	84	98	1572492	4e-09	870	900	31	lukS-PV	Panton-Valentine leukocidin chain S precursor[Staphylococcus aureus subsp. aureus SA957]	NC_022442.1	1534859	1535797	BA000033.2	1e-07	1530429	1530399	31
CAGAATTTATTGGTGTCCTATCTCGAAAACA	17.889	84	98	1571682	4e-09	740	770	31	lukF-PV	Panton-Valentine leukocidin chain F precursor[Staphylococcus aureus subsp. aureus SA957]	NC_022442.1	1533880	1534857	BA000033.2	1e-07	1529619	1529589	31
CAGACAATGAATTACCCCCATTAGTACACAG	17.889	84	98	1572697	4e-09	665	695	31	lukS-PV	Panton-Valentine leukocidin chain S precursor[Staphylococcus aureus subsp. aureus SA957]	NC_022442.1	1534859	1535797	BA000033.2	1e-07	1530634	1530604	31
CAGACATTTTACCTAATGATGTGATAAATGA	17.889	84	98	1572794	4e-09	598	568	31	lukS-PV	Panton-Valentine leukocidin chain S precursor[Staphylococcus aureus subsp. aureus SA957]	NC_022442.1	1534859	1535797	BA000033.2	1e-07	1530701	1530731	31
CAGAGACAATTAACTATAAACAAGAAAGCTA	17.889	84	98	1571934	4e-09	488	518	31	lukF-PV	Panton-Valentine leukocidin chain F precursor[Staphylococcus aureus subsp. aureus SA957]	NC_022442.1	1533880	1534857	BA000033.2	1e-07	1529871	1529841	31
CAGATTCTAATGACTCAGTAAACGTTGTAGA	17.889	84	98	1572087	4e-09	335	365	31	lukF-PV	Panton-Valentine leukocidin chain F precursor[Staphylococcus aureus subsp. aureus SA957]	NC_022442.1	1533880	1534857	BA000033.2	1e-07	1530024	1529994	31
CAGATTTTAACTTTTAATTTTATTAAAGATA	17.889	84	98	1572250	4e-09	172	202	31	lukF-PV	Panton-Valentine leukocidin chain F precursor[Staphylococcus aureus subsp. aureus SA957]	NC_022442.1	1533880	1534857	BA000033.2	1e-07	1530187	1530157	31
CAGCAGCTTTGAGTATTAATGTATCTTTATC	17.889	84	98	1572211	4e-09	241	211	31	lukF-PV	Panton-Valentine leukocidin chain F precursor[Staphylococcus aureus subsp. aureus SA957]	NC_022442.1	1533880	1534857	BA000033.2	1e-07	1530118	1530148	31
CAGCATTTAAGTTGCTTTGTCTTGAGCCTAA	17.889	84	98	1571770	4e-09	682	652	31	lukF-PV	Panton-Valentine leukocidin chain F precursor[Staphylococcus aureus subsp. aureus SA957]	NC_022442.1	1533880	1534857	BA000033.2	1e-07	1529677	1529707	31
CAGCTCAACATATCACACCTGTAAGTGAGAA	17.889	84	98	1572351	4e-09	71	101	31	lukF-PV	Panton-Valentine leukocidin chain F precursor[Staphylococcus aureus subsp. aureus SA957]	NC_022442.1	1533880	1534857	BA000033.2	1e-07	1530288	1530258	31
CAGCTTTGAGTATTAATGTATCTTTATCATA	17.889	84	98	1572214	4e-09	238	208	31	lukF-PV	Panton-Valentine leukocidin chain F precursor[Staphylococcus aureus subsp. aureus SA957]	NC_022442.1	1533880	1534857	BA000033.2	1e-07	1530121	1530151	31
CAGGAGATACAAGTGAATTTGAAATAACGTA	17.889	84	98	1572619	4e-09	743	773	31	lukS-PV	Panton-Valentine leukocidin chain S precursor[Staphylococcus aureus subsp. aureus SA957]	NC_022442.1	1534859	1535797	BA000033.2	1e-07	1530556	1530526	31
CAGGAGGTAATGGTTCATTTAATTATTCAAA	17.889	84	98	1572910	4e-09	452	482	31	lukS-PV	Panton-Valentine leukocidin chain S precursor[Staphylococcus aureus subsp. aureus SA957]	NC_022442.1	1534859	1535797	AY954956.1	1e-07	24540	24570	31
CAGGTGGAGGTAATGGTTCAAAATCTTTTTC	17.889	84	98	1571964	4e-09	458	488	31	lukF-PV	Panton-Valentine leukocidin chain F precursor[Staphylococcus aureus subsp. aureus SA957]	NC_022442.1	1533880	1534857	BA000033.2	1e-07	1529901	1529871	31
CAGTAAACGTTGTAGATTATGCACCTAAAAA	17.889	84	98	1572072	4e-09	350	380	31	lukF-PV	Panton-Valentine leukocidin chain F precursor[Staphylococcus aureus subsp. aureus SA957]	NC_022442.1	1533880	1534857	BA000033.2	1e-07	1530009	1529979	31
CAGTAAATGTTAGTCAAACATTAGGTTATAA	17.889	84	98	1572973	4e-09	389	419	31	lukS-PV	Panton-Valentine leukocidin chain S precursor[Staphylococcus aureus subsp. aureus SA957]	NC_022442.1	1534859	1535797	AY954956.1	1e-07	24477	24507	31
CAGTGAAGTTGATTCCAAAAGTTTGTATATC	17.889	84	98	1571598	4e-09	854	824	31	lukF-PV	Panton-Valentine leukocidin chain F precursor[Staphylococcus aureus subsp. aureus SA957]	NC_022442.1	1533880	1534857	BA000033.2	1e-07	1529505	1529535	31
CAGTGTTATCCAGAGGTAACTTCAATCCAGA	17.889	84	98	1571709	4e-09	713	743	31	lukF-PV	Panton-Valentine leukocidin chain F precursor[Staphylococcus aureus subsp. aureus SA957]	NC_022442.1	1533880	1534857	BA000033.2	1e-07	1529646	1529616	31
CAGTTAAATATGAAGTGAACTGGAAAACTCA	17.889	84	98	1572481	4e-09	881	911	31	lukS-PV	Panton-Valentine leukocidin chain S precursor[Staphylococcus aureus subsp. aureus SA957]	NC_022442.1	1534859	1535797	BA000033.2	1e-07	1530418	1530388	31
CAGTTAAATTAATAGATACTCAATCTAAGGA	17.889	84	98	1571493	4e-09	929	959	31	lukF-PV	Panton-Valentine leukocidin chain F precursor[Staphylococcus aureus subsp. aureus SA957]	NC_022442.1	1533880	1534857	BA000033.2	1e-07	1529430	1529400	31
CAGTTCACTTCATATTTAACTGTGTAATTTC	17.889	84	98	1572490	4e-09	902	872	31	lukS-PV	Panton-Valentine leukocidin chain S precursor[Staphylococcus aureus subsp. aureus SA957]	NC_022442.1	1534859	1535797	BA000033.2	1e-07	1530397	1530427	31
CAGTTTGATTTTGTTAAAGATAAAAAGTATA	17.889	84	98	1573184	4e-09	178	208	31	lukS-PV	Panton-Valentine leukocidin chain S precursor[Staphylococcus aureus subsp. aureus SA957]	NC_022442.1	1534859	1535797	AY954956.1	1e-07	24266	24296	31
CATAAGTTGAATGATAACTATCTCTGCCATA	17.889	84	98	1571815	4e-09	637	607	31	lukF-PV	Panton-Valentine leukocidin chain F precursor[Staphylococcus aureus subsp. aureus SA957]	NC_022442.1	1533880	1534857	BA000033.2	1e-07	1529722	1529752	31
CATAATCTACAACGTTTACTGAGTCATTAGA	17.889	84	98	1572082	4e-09	370	340	31	lukF-PV	Panton-Valentine leukocidin chain F precursor[Staphylococcus aureus subsp. aureus SA957]	NC_022442.1	1533880	1534857	BA000033.2	1e-07	1529989	1530019	31
CATAATTGATATGAAAAAAATAGTCAAATCA	17.889	84	98	1572431	0.001	1	21	21	lukF-PV	Panton-Valentine leukocidin chain F precursor[Staphylococcus aureus subsp. aureus SA957]	NC_022442.1	1533880	1534857	BA000033.2	1e-07	1530368	1530338	31
CATACAGTTAAATTAATAGATACTCAATCTA	17.889	84	98	1571497	4e-09	925	955	31	lukF-PV	Panton-Valentine leukocidin chain F precursor[Staphylococcus aureus subsp. aureus SA957]	NC_022442.1	1533880	1534857	BA000033.2	1e-07	1529434	1529404	31
CATACGTTATTTCAAATTCACTTGTATCTCC	17.889	84	98	1572617	4e-09	775	745	31	lukS-PV	Panton-Valentine leukocidin chain S precursor[Staphylococcus aureus subsp. aureus SA957]	NC_022442.1	1534859	1535797	BA000033.2	1e-07	1530524	1530554	31
CATAGGTGGTAATTTTAATAGTGGTCCATCA	17.889	84	98	1572942	4e-09	420	450	31	lukS-PV	Panton-Valentine leukocidin chain S precursor[Staphylococcus aureus subsp. aureus SA957]	NC_022442.1	1534859	1535797	AY954956.1	1e-07	24508	24538	31
CATATCAATTATGTCCTTTCACTTTAATTTC	17.889	84	98	1572449	6e-07	939	913	27	NA	NA	NA	NA	NA	BA000033.2	1e-07	1530356	1530386	31
CATATGGCAGAGATAGTTATCATTCAACTTA	17.889	84	98	1571817	4e-09	605	635	31	lukF-PV	Panton-Valentine leukocidin chain F precursor[Staphylococcus aureus subsp. aureus SA957]	NC_022442.1	1533880	1534857	BA000033.2	1e-07	1529754	1529724	31
CATATTTAACTGTGTAATTTCTGTTTACAAA	17.889	84	98	1572500	4e-09	892	862	31	lukS-PV	Panton-Valentine leukocidin chain S precursor[Staphylococcus aureus subsp. aureus SA957]	NC_022442.1	1534859	1535797	BA000033.2	1e-07	1530407	1530437	31
CATATTTCTGCCATACGTTATTTCAAATTCA	17.889	84	98	1572606	4e-09	786	756	31	lukS-PV	Panton-Valentine leukocidin chain S precursor[Staphylococcus aureus subsp. aureus SA957]	NC_022442.1	1534859	1535797	BA000033.2	1e-07	1530513	1530543	31
CATCAACAGGAGGTAATGGTTCATTTAATTA	17.889	84	98	1572916	4e-09	446	476	31	lukS-PV	Panton-Valentine leukocidin chain S precursor[Staphylococcus aureus subsp. aureus SA957]	NC_022442.1	1534859	1535797	AY954956.1	1e-07	24534	24564	31
CATCAACTGTATTGGATAGCAAAAGCAATGC	17.889	84	98	1572382	4e-09	70	40	31	lukF-PV	Panton-Valentine leukocidin chain F precursor[Staphylococcus aureus subsp. aureus SA957]	NC_022442.1	1533880	1534857	BA000033.2	1e-07	1530289	1530319	31
CATCAATTGCATTGCTTTTGCTATCCAATAC	17.889	84	98	1572390	4e-09	32	62	31	lukF-PV	Panton-Valentine leukocidin chain F precursor[Staphylococcus aureus subsp. aureus SA957]	NC_022442.1	1533880	1534857	BA000033.2	1e-07	1530327	1530297	31
CATCACCAATATTCTCAATATTGTTATCAGC	17.889	84	98	1573280	4e-09	112	82	31	lukS-PV	Panton-Valentine leukocidin chain S precursor[Staphylococcus aureus subsp. aureus SA957]	NC_022442.1	1534859	1535797	AY954956.1	1e-07	24200	24170	31
CATCAGATTCCGATAAGTTAAAAATTTCTCA	17.889	84	98	1572279	4e-09	143	173	31	lukF-PV	Panton-Valentine leukocidin chain F precursor[Staphylococcus aureus subsp. aureus SA957]	NC_022442.1	1533880	1534857	BA000033.2	1e-07	1530216	1530186	31
CATCATTAGGTAAAATGTCTGGACATGATCC	17.889	84	98	1572784	4e-09	578	608	31	lukS-PV	Panton-Valentine leukocidin chain S precursor[Staphylococcus aureus subsp. aureus SA957]	NC_022442.1	1534859	1535797	BA000033.2	1e-07	1530721	1530691	31
CATCCATATTTCTGCCATACGTTATTTCAAA	17.889	84	98	1572602	4e-09	790	760	31	lukS-PV	Panton-Valentine leukocidin chain S precursor[Staphylococcus aureus subsp. aureus SA957]	NC_022442.1	1534859	1535797	BA000033.2	1e-07	1530509	1530539	31
CATCTTTATAATTATTACCTATCCAGTGAAG	17.889	84	98	1571575	4e-09	877	847	31	lukF-PV	Panton-Valentine leukocidin chain F precursor[Staphylococcus aureus subsp. aureus SA957]	NC_022442.1	1533880	1534857	BA000033.2	1e-07	1529482	1529512	31
CATGAATCTAAAGCTGATAACAATATTGAGA	17.889	84	98	1573292	4e-09	70	100	31	lukS-PV	Panton-Valentine leukocidin chain S precursor[Staphylococcus aureus subsp. aureus SA957]	NC_022442.1	1534859	1535797	AY954956.1	1e-07	24158	24188	31
CATGAGTTTTCCAGTTCACTTCATATTTAAC	17.889	84	98	1572479	4e-09	913	883	31	lukS-PV	Panton-Valentine leukocidin chain S precursor[Staphylococcus aureus subsp. aureus SA957]	NC_022442.1	1534859	1535797	BA000033.2	1e-07	1530386	1530416	31
CATGATCCAAATTTATTTGTTGGATATAAAC	17.889	84	98	1572761	4e-09	601	631	31	lukS-PV	Panton-Valentine leukocidin chain S precursor[Staphylococcus aureus subsp. aureus SA957]	NC_022442.1	1534859	1535797	BA000033.2	1e-07	1530698	1530668	31
CATGCTACTAGAAGAACAACACACTATGGCA	17.889	84	98	1572566	4e-09	796	826	31	lukS-PV	Panton-Valentine leukocidin chain S precursor[Staphylococcus aureus subsp. aureus SA957]	NC_022442.1	1534859	1535797	BA000033.2	1e-07	1530503	1530473	31
CATTAATACTCAAAGCTGCTGGAAACATTTA	17.889	84	98	1572201	4e-09	221	251	31	lukF-PV	Panton-Valentine leukocidin chain F precursor[Staphylococcus aureus subsp. aureus SA957]	NC_022442.1	1533880	1534857	BA000033.2	1e-07	1530138	1530108	31
CATTACCTCCTGTTGATGGACCACTATTAAA	17.889	84	98	1572929	4e-09	463	433	31	lukS-PV	Panton-Valentine leukocidin chain S precursor[Staphylococcus aureus subsp. aureus SA957]	NC_022442.1	1534859	1535797	AY954956.1	1e-07	24551	24521	31
CATTAGAATCTGAATTAATTGAAATGTTGTA	17.889	84	98	1572106	4e-09	346	316	31	lukF-PV	Panton-Valentine leukocidin chain F precursor[Staphylococcus aureus subsp. aureus SA957]	NC_022442.1	1533880	1534857	BA000033.2	1e-07	1530013	1530043	31
CATTAGGTAAAATGTCTGGACATGATCCAAA	17.889	84	98	1572781	4e-09	581	611	31	lukS-PV	Panton-Valentine leukocidin chain S precursor[Staphylococcus aureus subsp. aureus SA957]	NC_022442.1	1534859	1535797	BA000033.2	1e-07	1530718	1530688	31
CATTAGGTTATAACATAGGTGGTAATTTTAA	17.889	84	98	1572955	4e-09	407	437	31	lukS-PV	Panton-Valentine leukocidin chain S precursor[Staphylococcus aureus subsp. aureus SA957]	NC_022442.1	1534859	1535797	AY954956.1	1e-07	24495	24525	31
CATTCAACTTATGGTAATGAAATGTTTTTAG	17.889	84	98	1571797	4e-09	625	655	31	lukF-PV	Panton-Valentine leukocidin chain F precursor[Staphylococcus aureus subsp. aureus SA957]	NC_022442.1	1533880	1534857	BA000033.2	1e-07	1529734	1529704	31
CATTGCTTTTATATGATCTGTGTTTTTGTAA	17.889	84	98	1573092	4e-09	300	270	31	lukS-PV	Panton-Valentine leukocidin chain S precursor[Staphylococcus aureus subsp. aureus SA957]	NC_022442.1	1534859	1535797	AY954956.1	1e-07	24388	24358	31
CATTGCTTTTGCTATCCAATACAGTTGATGC	17.889	84	98	1572381	4e-09	41	71	31	lukF-PV	Panton-Valentine leukocidin chain F precursor[Staphylococcus aureus subsp. aureus SA957]	NC_022442.1	1533880	1534857	BA000033.2	1e-07	1530318	1530288	31
CATTTAAGTTGCTTTGTCTTGAGCCTAAAAA	17.889	84	98	1571773	4e-09	679	649	31	lukF-PV	Panton-Valentine leukocidin chain F precursor[Staphylococcus aureus subsp. aureus SA957]	NC_022442.1	1533880	1534857	BA000033.2	1e-07	1529680	1529710	31
CATTTAATTATTCAAAAACAATTAGTTATAA	17.889	84	98	1572895	4e-09	467	497	31	lukS-PV	Panton-Valentine leukocidin chain S precursor[Staphylococcus aureus subsp. aureus SA957]	NC_022442.1	1534859	1535797	AY954956.1	1e-07	24555	24585	31
CATTTATCACATCATTAGGTAAAATGTCTGG	17.889	84	98	1572793	4e-09	569	599	31	lukS-PV	Panton-Valentine leukocidin chain S precursor[Staphylococcus aureus subsp. aureus SA957]	NC_022442.1	1534859	1535797	BA000033.2	1e-07	1530730	1530700	31
CATTTATTCTGGCTATACAAAGCCAAATCCA	17.889	84	98	1572176	4e-09	246	276	31	lukF-PV	Panton-Valentine leukocidin chain F precursor[Staphylococcus aureus subsp. aureus SA957]	NC_022442.1	1533880	1534857	BA000033.2	1e-07	1530113	1530083	31
CATTTATTGCAACTGTTTCTCATGAAAAAGG	17.889	84	98	1572652	4e-09	710	740	31	lukS-PV	Panton-Valentine leukocidin chain S precursor[Staphylococcus aureus subsp. aureus SA957]	NC_022442.1	1534859	1535797	BA000033.2	1e-07	1530589	1530559	31
CATTTCAATTAATTCAGATTCTAATGACTCA	17.889	84	98	1572101	4e-09	321	351	31	lukF-PV	Panton-Valentine leukocidin chain F precursor[Staphylococcus aureus subsp. aureus SA957]	NC_022442.1	1533880	1534857	BA000033.2	1e-07	1530038	1530008	31
CATTTCATTACCATAAGTTGAATGATAACTA	17.889	84	98	1571804	4e-09	648	618	31	lukF-PV	Panton-Valentine leukocidin chain F precursor[Staphylococcus aureus subsp. aureus SA957]	NC_022442.1	1533880	1534857	BA000033.2	1e-07	1529711	1529741	31
CATTTGTAAACAGAAATTACACAGTTAAATA	17.889	84	98	1572502	4e-09	860	890	31	lukS-PV	Panton-Valentine leukocidin chain S precursor[Staphylococcus aureus subsp. aureus SA957]	NC_022442.1	1534859	1535797	BA000033.2	1e-07	1530439	1530409	31
CATTTTACCTAATGATGTGATAAATGAATTA	17.889	84	98	1572798	4e-09	594	564	31	lukS-PV	Panton-Valentine leukocidin chain S precursor[Staphylococcus aureus subsp. aureus SA957]	NC_022442.1	1534859	1535797	BA000033.2	1e-07	1530705	1530735	31
CATTTTGATTTTTAGGTGCATAATCTACAAC	17.889	84	98	1572064	4e-09	388	358	31	lukF-PV	Panton-Valentine leukocidin chain F precursor[Staphylococcus aureus subsp. aureus SA957]	NC_022442.1	1533880	1534857	BA000033.2	1e-07	1529971	1530001	31
CATTTTGTGATATTCCAAGAAGTTTTGTCCA	17.889	84	98	1571741	4e-09	711	681	31	lukF-PV	Panton-Valentine leukocidin chain F precursor[Staphylococcus aureus subsp. aureus SA957]	NC_022442.1	1533880	1534857	BA000033.2	1e-07	1529648	1529678	31
CATTTTTAAAATCAAAGCGTCTTTGTTATAC	17.889	84	98	1573158	4e-09	234	204	31	lukS-PV	Panton-Valentine leukocidin chain S precursor[Staphylococcus aureus subsp. aureus SA957]	NC_022442.1	1534859	1535797	AY954956.1	1e-07	24322	24292	31
CCAAATTTATTTGTTGGATATAAACCATATA	17.889	84	98	1572755	4e-09	607	637	31	lukS-PV	Panton-Valentine leukocidin chain S precursor[Staphylococcus aureus subsp. aureus SA957]	NC_022442.1	1534859	1535797	BA000033.2	1e-07	1530692	1530662	31
CCAACAAATAAATTTGGATCATGTCCAGACA	17.889	84	98	1572769	4e-09	623	593	31	lukS-PV	Panton-Valentine leukocidin chain S precursor[Staphylococcus aureus subsp. aureus SA957]	NC_022442.1	1534859	1535797	BA000033.2	1e-07	1530676	1530706	31
CCAACCAATTTTTTTGAAATTAGTTCTTTTA	17.889	84	98	1571888	4e-09	564	534	31	lukF-PV	Panton-Valentine leukocidin chain F precursor[Staphylococcus aureus subsp. aureus SA957]	NC_022442.1	1533880	1534857	BA000033.2	1e-07	1529795	1529825	31
CCAATAAATTCTGGATTGAAGTTACCTCTGG	17.889	84	98	1571700	4e-09	752	722	31	lukF-PV	Panton-Valentine leukocidin chain F precursor[Staphylococcus aureus subsp. aureus SA957]	NC_022442.1	1533880	1534857	BA000033.2	1e-07	1529607	1529637	31
CCAATACAGTTGATGCAGCTCAACATATCAC	17.889	84	98	1572366	4e-09	56	86	31	lukF-PV	Panton-Valentine leukocidin chain F precursor[Staphylococcus aureus subsp. aureus SA957]	NC_022442.1	1533880	1534857	BA000033.2	1e-07	1530303	1530273	31
CCAATATTCTCAATATTGTTATCAGCTTTAG	17.889	84	98	1573285	4e-09	107	77	31	lukS-PV	Panton-Valentine leukocidin chain S precursor[Staphylococcus aureus subsp. aureus SA957]	NC_022442.1	1534859	1535797	AY954956.1	1e-07	24195	24165	31
CCAATTTTTTTGAAATTAGTTCTTTTATCTA	17.889	84	98	1571892	4e-09	560	530	31	lukF-PV	Panton-Valentine leukocidin chain F precursor[Staphylococcus aureus subsp. aureus SA957]	NC_022442.1	1533880	1534857	BA000033.2	1e-07	1529799	1529829	31
CCACCATAAGAATAACCTACCGTTTGTTGTA	17.889	84	98	1572021	4e-09	431	401	31	lukF-PV	Panton-Valentine leukocidin chain F precursor[Staphylococcus aureus subsp. aureus SA957]	NC_022442.1	1533880	1534857	BA000033.2	1e-07	1529928	1529958	31
CCACCTATGTTATAACCTAATGTTTGACTAA	17.889	84	98	1572964	4e-09	428	398	31	lukS-PV	Panton-Valentine leukocidin chain S precursor[Staphylococcus aureus subsp. aureus SA957]	NC_022442.1	1534859	1535797	AY954956.1	1e-07	24516	24486	31
CCACGTCAATTAAGACGTGGTTACCCTAATA	17.889	84	98	1571385	0.0004	167	188	22	MS7_0645	pyridine nucleotide-disulfide oxidoreductase family protein[Staphylococcus aureus subsp. aureus 11819-97]	NC_017351.1	686824	687024	BA000033.2	1e-07	1529292	1529322	31
CCACTATTAAAATTACCACCTATGTTATAAC	17.889	84	98	1572949	4e-09	443	413	31	lukS-PV	Panton-Valentine leukocidin chain S precursor[Staphylococcus aureus subsp. aureus SA957]	NC_022442.1	1534859	1535797	AY954956.1	1e-07	24531	24501	31
CCAGAATAAATGTTTCCAGCAGCTTTGAGTA	17.889	84	98	1572195	4e-09	257	227	31	lukF-PV	Panton-Valentine leukocidin chain F precursor[Staphylococcus aureus subsp. aureus SA957]	NC_022442.1	1533880	1534857	BA000033.2	1e-07	1530102	1530132	31
CCAGAATTTATTGGTGTCCTATCTCGAAAAC	17.889	84	98	1571683	4e-09	739	769	31	lukF-PV	Panton-Valentine leukocidin chain F precursor[Staphylococcus aureus subsp. aureus SA957]	NC_022442.1	1533880	1534857	BA000033.2	1e-07	1529620	1529590	31
CCAGACAATGAATTACCCCCATTAGTACACA	17.889	84	98	1572698	4e-09	664	694	31	lukS-PV	Panton-Valentine leukocidin chain S precursor[Staphylococcus aureus subsp. aureus SA957]	NC_022442.1	1534859	1535797	BA000033.2	1e-07	1530635	1530605	31
CCAGCATTTAAGTTGCTTTGTCTTGAGCCTA	17.889	84	98	1571769	4e-09	683	653	31	lukF-PV	Panton-Valentine leukocidin chain F precursor[Staphylococcus aureus subsp. aureus SA957]	NC_022442.1	1533880	1534857	BA000033.2	1e-07	1529676	1529706	31
CCAGTGTTATCCAGAGGTAACTTCAATCCAG	17.889	84	98	1571710	4e-09	712	742	31	lukF-PV	Panton-Valentine leukocidin chain F precursor[Staphylococcus aureus subsp. aureus SA957]	NC_022442.1	1533880	1534857	BA000033.2	1e-07	1529647	1529617	31
CCATACGTTATTTCAAATTCACTTGTATCTC	17.889	84	98	1572616	4e-09	776	746	31	lukS-PV	Panton-Valentine leukocidin chain S precursor[Staphylococcus aureus subsp. aureus SA957]	NC_022442.1	1534859	1535797	BA000033.2	1e-07	1530523	1530553	31
CCATAGTGTGTTGTTCTTCTAGTAGCATGAG	17.889	84	98	1572568	4e-09	824	794	31	lukS-PV	Panton-Valentine leukocidin chain S precursor[Staphylococcus aureus subsp. aureus SA957]	NC_022442.1	1534859	1535797	BA000033.2	1e-07	1530475	1530505	31
CCATATTTCTGCCATACGTTATTTCAAATTC	17.889	84	98	1572605	4e-09	787	757	31	lukS-PV	Panton-Valentine leukocidin chain S precursor[Staphylococcus aureus subsp. aureus SA957]	NC_022442.1	1534859	1535797	BA000033.2	1e-07	1530512	1530542	31
CCATCACCAATATTCTCAATATTGTTATCAG	17.889	84	98	1573279	4e-09	113	83	31	lukS-PV	Panton-Valentine leukocidin chain S precursor[Staphylococcus aureus subsp. aureus SA957]	NC_022442.1	1534859	1535797	AY954956.1	1e-07	24201	24171	31
CCATTACCTCCTGTTGATGGACCACTATTAA	17.889	84	98	1572928	4e-09	464	434	31	lukS-PV	Panton-Valentine leukocidin chain S precursor[Staphylococcus aureus subsp. aureus SA957]	NC_022442.1	1534859	1535797	AY954956.1	1e-07	24552	24522	31
CCCATTAGTACACAGTGGTTTCAATCCTTCA	17.889	84	98	1572681	4e-09	681	711	31	lukS-PV	Panton-Valentine leukocidin chain S precursor[Staphylococcus aureus subsp. aureus SA957]	NC_022442.1	1534859	1535797	BA000033.2	1e-07	1530618	1530588	31
CCCCATTAGTACACAGTGGTTTCAATCCTTC	17.889	84	98	1572682	4e-09	680	710	31	lukS-PV	Panton-Valentine leukocidin chain S precursor[Staphylococcus aureus subsp. aureus SA957]	NC_022442.1	1534859	1535797	BA000033.2	1e-07	1530619	1530589	31
CCGATAAGTTAAAAATTTCTCAGATTTTAAC	17.889	84	98	1572270	4e-09	152	182	31	lukF-PV	Panton-Valentine leukocidin chain F precursor[Staphylococcus aureus subsp. aureus SA957]	NC_022442.1	1533880	1534857	BA000033.2	1e-07	1530207	1530177	31
CCGTTAGAGATATTAATATCTCCACCATAAG	17.889	84	98	1572000	4e-09	452	422	31	lukF-PV	Panton-Valentine leukocidin chain F precursor[Staphylococcus aureus subsp. aureus SA957]	NC_022442.1	1533880	1534857	BA000033.2	1e-07	1529907	1529937	31
CCTAAAAATAAAATAGATTCAGTAAATGTTA	17.889	84	98	1572992	4e-09	370	400	31	lukS-PV	Panton-Valentine leukocidin chain S precursor[Staphylococcus aureus subsp. aureus SA957]	NC_022442.1	1534859	1535797	AY954956.1	1e-07	24458	24488	31
CCTAAAAATCAAAATGAAGAATTTCAAGTAC	17.889	84	98	1572049	4e-09	373	403	31	lukF-PV	Panton-Valentine leukocidin chain F precursor[Staphylococcus aureus subsp. aureus SA957]	NC_022442.1	1533880	1534857	BA000033.2	1e-07	1529986	1529956	31
CCTAATGATGTGATAAATGAATTAGCTTTTA	17.889	84	98	1572805	4e-09	587	557	31	lukS-PV	Panton-Valentine leukocidin chain S precursor[Staphylococcus aureus subsp. aureus SA957]	NC_022442.1	1534859	1535797	BA000033.2	1e-07	1530712	1530742	31
CCTAATGTTTGACTAACATTTACTGAATCTA	17.889	84	98	1572979	4e-09	413	383	31	lukS-PV	Panton-Valentine leukocidin chain S precursor[Staphylococcus aureus subsp. aureus SA957]	NC_022442.1	1534859	1535797	AY954956.1	1e-07	24501	24471	31
CCTATCTCGAAAACAAAACGCTGCAAAAAAA	17.889	84	98	1571666	4e-09	756	786	31	lukF-PV	Panton-Valentine leukocidin chain F precursor[Staphylococcus aureus subsp. aureus SA957]	NC_022442.1	1533880	1534857	BA000033.2	1e-07	1529603	1529573	31
CCTATGAGCTAAACAGATAGATAATCAAAAA	17.889	84	98	1571455	0.005	968	987	20	SAAG_02096	panton-Valentine leukocidin chain F protein[Staphylococcus aureus subsp. aureus 55/2053]	NC_022113.1	1460399	1461385	BA000033.2	1e-07	1529392	1529362	31
CCTATTGCTACTTCGTTTCATGAATCTAAAG	17.889	84	98	1573310	4e-09	52	82	31	lukS-PV	Panton-Valentine leukocidin chain S precursor[Staphylococcus aureus subsp. aureus SA957]	NC_022442.1	1534859	1535797	AY954956.1	1e-07	24140	24170	31
CCTCCTGTTGATGGACCACTATTAAAATTAC	17.889	84	98	1572934	4e-09	458	428	31	lukS-PV	Panton-Valentine leukocidin chain S precursor[Staphylococcus aureus subsp. aureus SA957]	NC_022442.1	1534859	1535797	AY954956.1	1e-07	24546	24516	31
CCTGAGCCTTTTTCATGAGAAACAGTTGCAA	17.889	84	98	1572646	4e-09	746	716	31	lukS-PV	Panton-Valentine leukocidin chain S precursor[Staphylococcus aureus subsp. aureus SA957]	NC_022442.1	1534859	1535797	BA000033.2	1e-07	1530553	1530583	31
CCTGTAAGTGAGAAAAAGGTTGATGATAAAA	17.889	84	98	1572334	4e-09	88	118	31	lukF-PV	Panton-Valentine leukocidin chain F precursor[Staphylococcus aureus subsp. aureus SA957]	NC_022442.1	1533880	1534857	BA000033.2	1e-07	1530271	1530241	31
CCTGTTGATGGACCACTATTAAAATTACCAC	17.889	84	98	1572937	4e-09	455	425	31	lukS-PV	Panton-Valentine leukocidin chain S precursor[Staphylococcus aureus subsp. aureus SA957]	NC_022442.1	1534859	1535797	AY954956.1	1e-07	24543	24513	31
CCTTCATTTATTGCAACTGTTTCTCATGAAA	17.889	84	98	1572656	4e-09	706	736	31	lukS-PV	Panton-Valentine leukocidin chain S precursor[Staphylococcus aureus subsp. aureus SA957]	NC_022442.1	1534859	1535797	BA000033.2	1e-07	1530593	1530563	31
CGAAGTAGCAATAGGAGTGATTATTCCTAAC	17.889	84	98	1573326	4e-09	66	36	31	lukS-PV	Panton-Valentine leukocidin chain S precursor[Staphylococcus aureus subsp. aureus SA957]	NC_022442.1	1534859	1535797	AY954956.1	1e-07	24154	24124	31
CGAGATAGGACACCAATAAATTCTGGATTGA	17.889	84	98	1571688	4e-09	764	734	31	lukF-PV	Panton-Valentine leukocidin chain F precursor[Staphylococcus aureus subsp. aureus SA957]	NC_022442.1	1533880	1534857	BA000033.2	1e-07	1529595	1529625	31
CGCATTTGTAAACAGAAATTACACAGTTAAA	17.889	84	98	1572504	4e-09	858	888	31	lukS-PV	Panton-Valentine leukocidin chain S precursor[Staphylococcus aureus subsp. aureus SA957]	NC_022442.1	1534859	1535797	BA000033.2	1e-07	1530441	1530411	31
CGCCATCACCAATATTCTCAATATTGTTATC	17.889	84	98	1573277	4e-09	115	85	31	lukS-PV	Panton-Valentine leukocidin chain S precursor[Staphylococcus aureus subsp. aureus SA957]	NC_022442.1	1534859	1535797	AY954956.1	1e-07	24203	24173	31
CGCTGAGGTAGTCAAAAGAACAGAAGATACA	17.889	84	98	1573248	4e-09	114	144	31	lukS-PV	Panton-Valentine leukocidin chain S precursor[Staphylococcus aureus subsp. aureus SA957]	NC_022442.1	1534859	1535797	AY954956.1	1e-07	24202	24232	31
CGCTTTGATTTTAAAAATGCAAGGTTTTATC	17.889	84	98	1573146	4e-09	216	246	31	lukS-PV	Panton-Valentine leukocidin chain S precursor[Staphylococcus aureus subsp. aureus SA957]	NC_022442.1	1534859	1535797	AY954956.1	1e-07	24304	24334	31
CGGATTTTGACTATATGGTTTATATCCAACA	17.889	84	98	1572744	4e-09	648	618	31	lukS-PV	Panton-Valentine leukocidin chain S precursor[Staphylococcus aureus subsp. aureus SA957]	NC_022442.1	1534859	1535797	BA000033.2	1e-07	1530651	1530681	31
CGGTAGGTTATTCTTATGGTGGAGATATTAA	17.889	84	98	1572012	4e-09	410	440	31	lukF-PV	Panton-Valentine leukocidin chain F precursor[Staphylococcus aureus subsp. aureus SA957]	NC_022442.1	1533880	1534857	BA000033.2	1e-07	1529949	1529919	31
CGTATGGCAGAAATATGGATGTTACTCATGC	17.889	84	98	1572592	4e-09	770	800	31	lukS-PV	Panton-Valentine leukocidin chain S precursor[Staphylococcus aureus subsp. aureus SA957]	NC_022442.1	1534859	1535797	BA000033.2	1e-07	1530529	1530499	31
CGTCTTTGTTATACTTTTTATCTTTAACAAA	17.889	84	98	1573175	4e-09	217	187	31	lukS-PV	Panton-Valentine leukocidin chain S precursor[Staphylococcus aureus subsp. aureus SA957]	NC_022442.1	1534859	1535797	AY954956.1	1e-07	24305	24275	31
CGTTAGAGATATTAATATCTCCACCATAAGA	17.889	84	98	1572001	4e-09	451	421	31	lukF-PV	Panton-Valentine leukocidin chain F precursor[Staphylococcus aureus subsp. aureus SA957]	NC_022442.1	1533880	1534857	BA000033.2	1e-07	1529908	1529938	31
CGTTAGGAATAATCACTCCTATTGCTACTTC	17.889	84	98	1573327	4e-09	35	65	31	lukS-PV	Panton-Valentine leukocidin chain S precursor[Staphylococcus aureus subsp. aureus SA957]	NC_022442.1	1534859	1535797	AY954956.1	1e-07	24123	24153	31
CGTTTGTTGTACTTGAAATTCTTCATTTTGA	17.889	84	98	1572041	4e-09	411	381	31	lukF-PV	Panton-Valentine leukocidin chain F precursor[Staphylococcus aureus subsp. aureus SA957]	NC_022442.1	1533880	1534857	BA000033.2	1e-07	1529948	1529978	31
CGTTTTGTTTTCGAGATAGGACACCAATAAA	17.889	84	98	1571677	4e-09	775	745	31	lukF-PV	Panton-Valentine leukocidin chain F precursor[Staphylococcus aureus subsp. aureus SA957]	NC_022442.1	1533880	1534857	BA000033.2	1e-07	1529584	1529614	31
CTAAAAATAAAATAGATTCAGTAAATGTTAG	17.889	84	98	1572991	4e-09	371	401	31	lukS-PV	Panton-Valentine leukocidin chain S precursor[Staphylococcus aureus subsp. aureus SA957]	NC_022442.1	1534859	1535797	AY954956.1	1e-07	24459	24489	31
CTAAAAATCAAAATGAAGAATTTCAAGTACA	17.889	84	98	1572048	4e-09	374	404	31	lukF-PV	Panton-Valentine leukocidin chain F precursor[Staphylococcus aureus subsp. aureus SA957]	NC_022442.1	1533880	1534857	BA000033.2	1e-07	1529985	1529955	31
CTAAACAGATAGATAATCAAAAAATCTTAAA	17.889	84	98	1571447	0.79	126	108	20	qoxA	quinol oxidase subunit II[Staphylococcus pseudintermedius ED99]	NC_017568.1	1773635	1774735	BA000033.2	1e-07	1529384	1529354	31
CTAAGCTAGTTCTATAGCTTTCTTGTTTATA	17.889	84	98	1571920	4e-09	532	502	31	lukF-PV	Panton-Valentine leukocidin chain F precursor[Staphylococcus aureus subsp. aureus SA957]	NC_022442.1	1533880	1534857	BA000033.2	1e-07	1529827	1529857	31
CTAAGGAAAAAAATCCTATGAGCTAAACAGA	17.889	84	98	1571469	2e-07	953	984	32	SAAG_02096	panton-Valentine leukocidin chain F protein[Staphylococcus aureus subsp. aureus 55/2053]	NC_022113.1	1460399	1461385	BA000033.2	1e-07	1529406	1529376	31
CTAAGTACAACATTTCAATTAATTCAGATTC	17.889	84	98	1572111	4e-09	311	341	31	lukF-PV	Panton-Valentine leukocidin chain F precursor[Staphylococcus aureus subsp. aureus SA957]	NC_022442.1	1533880	1534857	BA000033.2	1e-07	1530048	1530018	31
CTAATGACTCAGTAAACGTTGTAGATTATGC	17.889	84	98	1572081	4e-09	341	371	31	lukF-PV	Panton-Valentine leukocidin chain F precursor[Staphylococcus aureus subsp. aureus SA957]	NC_022442.1	1533880	1534857	BA000033.2	1e-07	1530018	1529988	31
CTAATTTCAAAAAAATTGGTTGGGATGTTGA	17.889	84	98	1571880	4e-09	542	572	31	lukF-PV	Panton-Valentine leukocidin chain F precursor[Staphylococcus aureus subsp. aureus SA957]	NC_022442.1	1533880	1534857	BA000033.2	1e-07	1529817	1529787	31
CTACAACGTTTACTGAGTCATTAGAATCTGA	17.889	84	98	1572088	4e-09	364	334	31	lukF-PV	Panton-Valentine leukocidin chain F precursor[Staphylococcus aureus subsp. aureus SA957]	NC_022442.1	1533880	1534857	BA000033.2	1e-07	1529995	1530025	31
CTACTAGAAGAACAACACACTATGGCAATAG	17.889	84	98	1572562	4e-09	800	830	31	lukS-PV	Panton-Valentine leukocidin chain S precursor[Staphylococcus aureus subsp. aureus SA957]	NC_022442.1	1534859	1535797	BA000033.2	1e-07	1530499	1530469	31
CTACTTATTACAATTACAAAAACACAGATCA	17.889	84	98	1573105	4e-09	257	287	31	lukS-PV	Panton-Valentine leukocidin chain S precursor[Staphylococcus aureus subsp. aureus SA957]	NC_022442.1	1534859	1535797	AY954956.1	1e-07	24345	24375	31
CTACTTCACTGATATAGTTTTGTTGATTATA	17.889	84	98	1572869	4e-09	523	493	31	lukS-PV	Panton-Valentine leukocidin chain S precursor[Staphylococcus aureus subsp. aureus SA957]	NC_022442.1	1534859	1535797	BA000033.2	1e-07	1530776	1530806	31
CTACTTCGTTTCATGAATCTAAAGCTGATAA	17.889	84	98	1573303	4e-09	59	89	31	lukS-PV	Panton-Valentine leukocidin chain S precursor[Staphylococcus aureus subsp. aureus SA957]	NC_022442.1	1534859	1535797	AY954956.1	1e-07	24147	24177	31
CTAGAAGAACAACACACTATGGCAATAGTTA	17.889	84	98	1572559	4e-09	803	833	31	lukS-PV	Panton-Valentine leukocidin chain S precursor[Staphylococcus aureus subsp. aureus SA957]	NC_022442.1	1534859	1535797	BA000033.2	1e-07	1530496	1530466	31
CTAGAATACACAACGCATTTGTAAACAGAAA	17.889	84	98	1572517	4e-09	845	875	31	lukS-PV	Panton-Valentine leukocidin chain S precursor[Staphylococcus aureus subsp. aureus SA957]	NC_022442.1	1534859	1535797	BA000033.2	1e-07	1530454	1530424	31
CTAGCTTAGATAAAAGAACTAATTTCAAAAA	17.889	84	98	1571898	4e-09	524	554	31	lukF-PV	Panton-Valentine leukocidin chain F precursor[Staphylococcus aureus subsp. aureus SA957]	NC_022442.1	1533880	1534857	BA000033.2	1e-07	1529835	1529805	31
CTAGTAGCATGAGTAACATCCATATTTCTGC	17.889	84	98	1572586	4e-09	806	776	31	lukS-PV	Panton-Valentine leukocidin chain S precursor[Staphylococcus aureus subsp. aureus SA957]	NC_022442.1	1534859	1535797	BA000033.2	1e-07	1530493	1530523	31
CTAGTTCTATAGCTTTCTTGTTTATAGTTAA	17.889	84	98	1571925	4e-09	527	497	31	lukF-PV	Panton-Valentine leukocidin chain F precursor[Staphylococcus aureus subsp. aureus SA957]	NC_022442.1	1533880	1534857	BA000033.2	1e-07	1529832	1529862	31
CTATAAACAAGAAAGCTATAGAACTAGCTTA	17.889	84	98	1571921	4e-09	501	531	31	lukF-PV	Panton-Valentine leukocidin chain F precursor[Staphylococcus aureus subsp. aureus SA957]	NC_022442.1	1533880	1534857	BA000033.2	1e-07	1529858	1529828	31
CTATATTAGGGTAACCACGTCTTAATTGACG	17.889	84	98	1571388	0.017	188	170	19	MS7_0646	transcriptional regulator family protein[Staphylococcus aureus subsp. aureus 11819-97]	NC_017351.1	687011	687451	BA000033.2	1e-07	1529325	1529295	31
CTATCCAATACAGTTGATGCAGCTCAACATA	17.889	84	98	1572370	4e-09	52	82	31	lukF-PV	Panton-Valentine leukocidin chain F precursor[Staphylococcus aureus subsp. aureus SA957]	NC_022442.1	1533880	1534857	BA000033.2	1e-07	1530307	1530277	31
CTATCCATTTCTCTTTGATAAGTAACAGTAA	17.889	84	98	1571628	4e-09	824	794	31	lukF-PV	Panton-Valentine leukocidin chain F precursor[Staphylococcus aureus subsp. aureus SA957]	NC_022442.1	1533880	1534857	BA000033.2	1e-07	1529535	1529565	31
CTATGAGCTAAACAGATAGATAATCAAAAAA	17.889	84	98	1571454	0.017	969	987	19	SAAG_02096	panton-Valentine leukocidin chain F protein[Staphylococcus aureus subsp. aureus 55/2053]	NC_022113.1	1460399	1461385	BA000033.2	1e-07	1529391	1529361	31
CTATGGCAATAGTTATTTAGAAGGATCTAGA	17.889	84	98	1572543	4e-09	819	849	31	lukS-PV	Panton-Valentine leukocidin chain S precursor[Staphylococcus aureus subsp. aureus SA957]	NC_022442.1	1534859	1535797	BA000033.2	1e-07	1530480	1530450	31
CTATTAAAATTACCACCTATGTTATAACCTA	17.889	84	98	1572952	4e-09	440	410	31	lukS-PV	Panton-Valentine leukocidin chain S precursor[Staphylococcus aureus subsp. aureus SA957]	NC_022442.1	1534859	1535797	AY954956.1	1e-07	24528	24498	31
CTATTAATTTAACTGTATGATTTTCCCAATC	17.889	84	98	1571509	4e-09	943	913	31	lukF-PV	Panton-Valentine leukocidin chain F precursor[Staphylococcus aureus subsp. aureus SA957]	NC_022442.1	1533880	1534857	BA000033.2	1e-07	1529416	1529446	31
CTATTAGTTCTCAATTTTATTGGGGTTCTAA	17.889	84	98	1572138	4e-09	284	314	31	lukF-PV	Panton-Valentine leukocidin chain F precursor[Staphylococcus aureus subsp. aureus SA957]	NC_022442.1	1533880	1534857	BA000033.2	1e-07	1530075	1530045	31
CTATTGCTACTTCGTTTCATGAATCTAAAGC	17.889	84	98	1573309	4e-09	53	83	31	lukS-PV	Panton-Valentine leukocidin chain S precursor[Staphylococcus aureus subsp. aureus SA957]	NC_022442.1	1534859	1535797	AY954956.1	1e-07	24141	24171	31
CTATTTTCATCTTTATAATTATTACCTATCC	17.889	84	98	1571568	4e-09	884	854	31	lukF-PV	Panton-Valentine leukocidin chain F precursor[Staphylococcus aureus subsp. aureus SA957]	NC_022442.1	1533880	1534857	BA000033.2	1e-07	1529475	1529505	31
CTATTTTTTTCATATCAATTATGTCCTTTCA	17.889	84	98	1572439	0.22	337	357	21	STP1_0412	putative exonuclease[Staphylococcus pasteuri SP1]	NC_022737.1	472128	472682	BA000033.2	1e-07	1530346	1530376	31
CTCAACATATCACACCTGTAAGTGAGAAAAA	17.889	84	98	1572348	4e-09	74	104	31	lukF-PV	Panton-Valentine leukocidin chain F precursor[Staphylococcus aureus subsp. aureus SA957]	NC_022442.1	1533880	1534857	BA000033.2	1e-07	1530285	1530255	31
CTCAAGACAAAGCAACTTAAATGCTGGACAA	17.889	84	98	1571765	4e-09	657	687	31	lukF-PV	Panton-Valentine leukocidin chain F precursor[Staphylococcus aureus subsp. aureus SA957]	NC_022442.1	1533880	1534857	BA000033.2	1e-07	1529702	1529672	31
CTCAATATTGTTATCAGCTTTAGATTCATGA	17.889	84	98	1573293	4e-09	99	69	31	lukS-PV	Panton-Valentine leukocidin chain S precursor[Staphylococcus aureus subsp. aureus SA957]	NC_022442.1	1534859	1535797	AY954956.1	1e-07	24187	24157	31
CTCAATCTAAGGAAAAAAATCCTATGAGCTA	17.889	84	98	1571475	4e-09	947	977	31	lukF-PV	Panton-Valentine leukocidin chain F precursor[Staphylococcus aureus subsp. aureus SA957]	NC_022442.1	1533880	1534857	BA000033.2	1e-07	1529412	1529382	31
CTCACTTACAGGTGTGATATGTTGAGCTGCA	17.889	84	98	1572353	4e-09	99	69	31	lukF-PV	Panton-Valentine leukocidin chain F precursor[Staphylococcus aureus subsp. aureus SA957]	NC_022442.1	1533880	1534857	BA000033.2	1e-07	1530260	1530290	31
CTCAGATTTTAACTTTTAATTTTATTAAAGA	17.889	84	98	1572252	4e-09	170	200	31	lukF-PV	Panton-Valentine leukocidin chain F precursor[Staphylococcus aureus subsp. aureus SA957]	NC_022442.1	1533880	1534857	BA000033.2	1e-07	1530189	1530159	31
CTCAGGAGATACAAGTGAATTTGAAATAACG	17.889	84	98	1572621	4e-09	741	771	31	lukS-PV	Panton-Valentine leukocidin chain S precursor[Staphylococcus aureus subsp. aureus SA957]	NC_022442.1	1534859	1535797	BA000033.2	1e-07	1530558	1530528	31
CTCAGTAAACGTTGTAGATTATGCACCTAAA	17.889	84	98	1572074	4e-09	348	378	31	lukF-PV	Panton-Valentine leukocidin chain F precursor[Staphylococcus aureus subsp. aureus SA957]	NC_022442.1	1533880	1534857	BA000033.2	1e-07	1530011	1529981	31
CTCATGAAAAAGGCTCAGGAGATACAAGTGA	17.889	84	98	1572634	4e-09	728	758	31	lukS-PV	Panton-Valentine leukocidin chain S precursor[Staphylococcus aureus subsp. aureus SA957]	NC_022442.1	1534859	1535797	BA000033.2	1e-07	1530571	1530541	31
CTCCTATTGCTACTTCGTTTCATGAATCTAA	17.889	84	98	1573312	4e-09	50	80	31	lukS-PV	Panton-Valentine leukocidin chain S precursor[Staphylococcus aureus subsp. aureus SA957]	NC_022442.1	1534859	1535797	AY954956.1	1e-07	24138	24168	31
CTCCTGAGCCTTTTTCATGAGAAACAGTTGC	17.889	84	98	1572644	4e-09	748	718	31	lukS-PV	Panton-Valentine leukocidin chain S precursor[Staphylococcus aureus subsp. aureus SA957]	NC_022442.1	1534859	1535797	BA000033.2	1e-07	1530551	1530581	31
CTCCTGTTGATGGACCACTATTAAAATTACC	17.889	84	98	1572935	4e-09	457	427	31	lukS-PV	Panton-Valentine leukocidin chain S precursor[Staphylococcus aureus subsp. aureus SA957]	NC_022442.1	1534859	1535797	AY954956.1	1e-07	24545	24515	31
CTCGGATTTTGACTATATGGTTTATATCCAA	17.889	84	98	1572742	4e-09	650	620	31	lukS-PV	Panton-Valentine leukocidin chain S precursor[Staphylococcus aureus subsp. aureus SA957]	NC_022442.1	1534859	1535797	BA000033.2	1e-07	1530649	1530679	31
CTCTCGGATTTTGACTATATGGTTTATATCC	17.889	84	98	1572740	4e-09	652	622	31	lukS-PV	Panton-Valentine leukocidin chain S precursor[Staphylococcus aureus subsp. aureus SA957]	NC_022442.1	1534859	1535797	BA000033.2	1e-07	1530647	1530677	31
CTCTGAAAAAGATTTTGAACCATTACCTCCA	17.889	84	98	1571960	4e-09	492	462	31	lukF-PV	Panton-Valentine leukocidin chain F precursor[Staphylococcus aureus subsp. aureus SA957]	NC_022442.1	1533880	1534857	BA000033.2	1e-07	1529867	1529897	31
CTCTGGATAACACTGGCATTTTGTGATATTC	17.889	84	98	1571725	4e-09	727	697	31	lukF-PV	Panton-Valentine leukocidin chain F precursor[Staphylococcus aureus subsp. aureus SA957]	NC_022442.1	1533880	1534857	BA000033.2	1e-07	1529632	1529662	31
CTGAAAAAGATTTTGAACCATTACCTCCACC	17.889	84	98	1571962	4e-09	490	460	31	lukF-PV	Panton-Valentine leukocidin chain F precursor[Staphylococcus aureus subsp. aureus SA957]	NC_022442.1	1533880	1534857	BA000033.2	1e-07	1529869	1529899	31
CTGAATTAATTGAAATGTTGTACTTAGAACC	17.889	84	98	1572115	4e-09	337	307	31	lukF-PV	Panton-Valentine leukocidin chain F precursor[Staphylococcus aureus subsp. aureus SA957]	NC_022442.1	1533880	1534857	BA000033.2	1e-07	1530022	1530052	31
CTGCATCAACTGTATTGGATAGCAAAAGCAA	17.889	84	98	1572379	4e-09	73	43	31	lukF-PV	Panton-Valentine leukocidin chain F precursor[Staphylococcus aureus subsp. aureus SA957]	NC_022442.1	1533880	1534857	BA000033.2	1e-07	1530286	1530316	31
CTGCCATATGGTCCCCAACCATTATTCATAA	17.889	84	98	1571838	4e-09	614	584	31	lukF-PV	Panton-Valentine leukocidin chain F precursor[Staphylococcus aureus subsp. aureus SA957]	NC_022442.1	1533880	1534857	BA000033.2	1e-07	1529745	1529775	31
CTGCTGGAAACATTTATTCTGGCTATACAAA	17.889	84	98	1572186	4e-09	236	266	31	lukF-PV	Panton-Valentine leukocidin chain F precursor[Staphylococcus aureus subsp. aureus SA957]	NC_022442.1	1533880	1534857	BA000033.2	1e-07	1530123	1530093	31
CTGGAAAACTCATGAAATTAAAGTGAAAGGA	17.889	84	98	1572462	4e-09	900	930	31	lukS-PV	Panton-Valentine leukocidin chain S precursor[Staphylococcus aureus subsp. aureus SA957]	NC_022442.1	1534859	1535797	BA000033.2	1e-07	1530399	1530369	31
CTGGAAACATTTATTCTGGCTATACAAAGCC	17.889	84	98	1572183	4e-09	239	269	31	lukF-PV	Panton-Valentine leukocidin chain F precursor[Staphylococcus aureus subsp. aureus SA957]	NC_022442.1	1533880	1534857	BA000033.2	1e-07	1530120	1530090	31
CTGGACATGATCCAAATTTATTTGTTGGATA	17.889	84	98	1572766	4e-09	596	626	31	lukS-PV	Panton-Valentine leukocidin chain S precursor[Staphylococcus aureus subsp. aureus SA957]	NC_022442.1	1534859	1535797	BA000033.2	1e-07	1530703	1530673	31
CTGGATAACACTGGCATTTTGTGATATTCCA	17.889	84	98	1571727	4e-09	725	695	31	lukF-PV	Panton-Valentine leukocidin chain F precursor[Staphylococcus aureus subsp. aureus SA957]	NC_022442.1	1533880	1534857	BA000033.2	1e-07	1529634	1529664	31
CTGGCTATACAAAGCCAAATCCAAAAGACAC	17.889	84	98	1572168	4e-09	254	284	31	lukF-PV	Panton-Valentine leukocidin chain F precursor[Staphylococcus aureus subsp. aureus SA957]	NC_022442.1	1533880	1534857	BA000033.2	1e-07	1530105	1530075	31
CTGTATTGGATAGCAAAAGCAATGCAATTGA	17.889	84	98	1572388	4e-09	64	34	31	lukF-PV	Panton-Valentine leukocidin chain F precursor[Staphylococcus aureus subsp. aureus SA957]	NC_022442.1	1533880	1534857	BA000033.2	1e-07	1530295	1530325	31
CTGTTACTTATCAAAGAGAAATGGATAGATA	17.889	84	98	1571625	4e-09	797	827	31	lukF-PV	Panton-Valentine leukocidin chain F precursor[Staphylococcus aureus subsp. aureus SA957]	NC_022442.1	1533880	1534857	BA000033.2	1e-07	1529562	1529532	31
CTGTTCTTTTGACTACCTCAGCGCCATCACC	17.889	84	98	1573256	4e-09	136	106	31	lukS-PV	Panton-Valentine leukocidin chain S precursor[Staphylococcus aureus subsp. aureus SA957]	NC_022442.1	1534859	1535797	AY954956.1	1e-07	24224	24194	31
CTGTTGATGGACCACTATTAAAATTACCACC	17.889	84	98	1572938	4e-09	454	424	31	lukS-PV	Panton-Valentine leukocidin chain S precursor[Staphylococcus aureus subsp. aureus SA957]	NC_022442.1	1534859	1535797	AY954956.1	1e-07	24542	24512	31
CTGTTTACAAATGCGTTGTGTATTCTAGATC	17.889	84	98	1572520	4e-09	872	842	31	lukS-PV	Panton-Valentine leukocidin chain S precursor[Staphylococcus aureus subsp. aureus SA957]	NC_022442.1	1534859	1535797	BA000033.2	1e-07	1530427	1530457	31
CTGTTTAGCTCATAGGATTTTTTTCCTTAGA	17.889	84	98	1571470	2e-07	983	952	32	SAAG_02096	panton-Valentine leukocidin chain F protein[Staphylococcus aureus subsp. aureus 55/2053]	NC_022113.1	1460399	1461385	BA000033.2	1e-07	1529377	1529407	31
CTGTTTCTCATGAAAAAGGCTCAGGAGATAC	17.889	84	98	1572640	4e-09	722	752	31	lukS-PV	Panton-Valentine leukocidin chain S precursor[Staphylococcus aureus subsp. aureus SA957]	NC_022442.1	1534859	1535797	BA000033.2	1e-07	1530577	1530547	31
CTTAAATATGTTAAAATTTACAAACACTTTC	17.889	84	98	1571422	0.79	2029	2051	23	SPSINT_0503	primase, superantigen-encoding pathogenicity islands SaPI[Staphylococcus pseudintermedius HKU10-03]	NC_014925.1	548920	551289	BA000033.2	1e-07	1529359	1529329	31
CTTAGAACCCCAATAAAATTGAGAACTAATA	17.889	84	98	1572137	4e-09	315	285	31	lukF-PV	Panton-Valentine leukocidin chain F precursor[Staphylococcus aureus subsp. aureus SA957]	NC_022442.1	1533880	1534857	BA000033.2	1e-07	1530044	1530074	31
CTTAGATTGAGTATCTATTAATTTAACTGTA	17.889	84	98	1571495	4e-09	957	927	31	lukF-PV	Panton-Valentine leukocidin chain F precursor[Staphylococcus aureus subsp. aureus SA957]	NC_022442.1	1533880	1534857	BA000033.2	1e-07	1529402	1529432	31
CTTATCAAAGAGAAATGGATAGATATACAAA	17.889	84	98	1571619	4e-09	803	833	31	lukF-PV	Panton-Valentine leukocidin chain F precursor[Staphylococcus aureus subsp. aureus SA957]	NC_022442.1	1533880	1534857	BA000033.2	1e-07	1529556	1529526	31
CTTATGGTAATGAAATGTTTTTAGGCTCAAG	17.889	84	98	1571790	4e-09	632	662	31	lukF-PV	Panton-Valentine leukocidin chain F precursor[Staphylococcus aureus subsp. aureus SA957]	NC_022442.1	1533880	1534857	BA000033.2	1e-07	1529727	1529697	31
CTTCATATTTAACTGTGTAATTTCTGTTTAC	17.889	84	98	1572497	4e-09	895	865	31	lukS-PV	Panton-Valentine leukocidin chain S precursor[Staphylococcus aureus subsp. aureus SA957]	NC_022442.1	1534859	1535797	BA000033.2	1e-07	1530404	1530434	31
CTTCATTTATTGCAACTGTTTCTCATGAAAA	17.889	84	98	1572655	4e-09	707	737	31	lukS-PV	Panton-Valentine leukocidin chain S precursor[Staphylococcus aureus subsp. aureus SA957]	NC_022442.1	1534859	1535797	BA000033.2	1e-07	1530592	1530562	31
CTTCATTTTGATTTTTAGGTGCATAATCTAC	17.889	84	98	1572061	4e-09	391	361	31	lukF-PV	Panton-Valentine leukocidin chain F precursor[Staphylococcus aureus subsp. aureus SA957]	NC_022442.1	1533880	1534857	BA000033.2	1e-07	1529968	1529998	31
CTTCGTTTCATGAATCTAAAGCTGATAACAA	17.889	84	98	1573300	4e-09	62	92	31	lukS-PV	Panton-Valentine leukocidin chain S precursor[Staphylococcus aureus subsp. aureus SA957]	NC_022442.1	1534859	1535797	AY954956.1	1e-07	24150	24180	31
CTTCTAGTAGCATGAGTAACATCCATATTTC	17.889	84	98	1572583	4e-09	809	779	31	lukS-PV	Panton-Valentine leukocidin chain S precursor[Staphylococcus aureus subsp. aureus SA957]	NC_022442.1	1534859	1535797	BA000033.2	1e-07	1530490	1530520	31
CTTCTGTTCTTTTGACTACCTCAGCGCCATC	17.889	84	98	1573253	4e-09	139	109	31	lukS-PV	Panton-Valentine leukocidin chain S precursor[Staphylococcus aureus subsp. aureus SA957]	NC_022442.1	1534859	1535797	AY954956.1	1e-07	24227	24197	31
CTTCTTGGAATATCACAAAATGCCAGTGTTA	17.889	84	98	1571732	4e-09	690	720	31	lukF-PV	Panton-Valentine leukocidin chain F precursor[Staphylococcus aureus subsp. aureus SA957]	NC_022442.1	1533880	1534857	BA000033.2	1e-07	1529669	1529639	31
CTTGGAATATCACAAAATGCCAGTGTTATCC	17.889	84	98	1571729	4e-09	693	723	31	lukF-PV	Panton-Valentine leukocidin chain F precursor[Staphylococcus aureus subsp. aureus SA957]	NC_022442.1	1533880	1534857	BA000033.2	1e-07	1529666	1529636	31
CTTGTATCTCCTGAGCCTTTTTCATGAGAAA	17.889	84	98	1572637	4e-09	755	725	31	lukS-PV	Panton-Valentine leukocidin chain S precursor[Staphylococcus aureus subsp. aureus SA957]	NC_022442.1	1534859	1535797	BA000033.2	1e-07	1530544	1530574	31
CTTGTATCTTCTGTTCTTTTGACTACCTCAG	17.889	84	98	1573246	4e-09	146	116	31	lukS-PV	Panton-Valentine leukocidin chain S precursor[Staphylococcus aureus subsp. aureus SA957]	NC_022442.1	1534859	1535797	AY954956.1	1e-07	24234	24204	31
CTTGTTTATAGTTAATTGTCTCTGAAAAAGA	17.889	84	98	1571941	4e-09	511	481	31	lukF-PV	Panton-Valentine leukocidin chain F precursor[Staphylococcus aureus subsp. aureus SA957]	NC_022442.1	1533880	1534857	BA000033.2	1e-07	1529848	1529878	31
CTTTAATAAAATTAAAAGTTAAAATCTGAGA	17.889	84	98	1572253	4e-09	199	169	31	lukF-PV	Panton-Valentine leukocidin chain F precursor[Staphylococcus aureus subsp. aureus SA957]	NC_022442.1	1533880	1534857	BA000033.2	1e-07	1530160	1530190	31
CTTTAATTTCATGAGTTTTCCAGTTCACTTC	17.889	84	98	1572470	4e-09	922	892	31	lukS-PV	Panton-Valentine leukocidin chain S precursor[Staphylococcus aureus subsp. aureus SA957]	NC_022442.1	1534859	1535797	BA000033.2	1e-07	1530377	1530407	31
CTTTCTTGTTTATAGTTAATTGTCTCTGAAA	17.889	84	98	1571937	4e-09	515	485	31	lukF-PV	Panton-Valentine leukocidin chain F precursor[Staphylococcus aureus subsp. aureus SA957]	NC_022442.1	1533880	1534857	BA000033.2	1e-07	1529844	1529874	31
CTTTGAATTGATAAAACCTTGCATTTTTAAA	17.889	84	98	1573137	4e-09	255	225	31	lukS-PV	Panton-Valentine leukocidin chain S precursor[Staphylococcus aureus subsp. aureus SA957]	NC_022442.1	1534859	1535797	AY954956.1	1e-07	24343	24313	31
CTTTGATTTTAAAAATGCAAGGTTTTATCAA	17.889	84	98	1573144	4e-09	218	248	31	lukS-PV	Panton-Valentine leukocidin chain S precursor[Staphylococcus aureus subsp. aureus SA957]	NC_022442.1	1534859	1535797	AY954956.1	1e-07	24306	24336	31
CTTTGTATAGCCAGAATAAATGTTTCCAGCA	17.889	84	98	1572185	4e-09	267	237	31	lukF-PV	Panton-Valentine leukocidin chain F precursor[Staphylococcus aureus subsp. aureus SA957]	NC_022442.1	1533880	1534857	BA000033.2	1e-07	1530092	1530122	31
CTTTGTCTTGAGCCTAAAAACATTTCATTAC	17.889	84	98	1571784	4e-09	668	638	31	lukF-PV	Panton-Valentine leukocidin chain F precursor[Staphylococcus aureus subsp. aureus SA957]	NC_022442.1	1533880	1534857	BA000033.2	1e-07	1529691	1529721	31
CTTTGTTATACTTTTTATCTTTAACAAAATC	17.889	84	98	1573178	4e-09	214	184	31	lukS-PV	Panton-Valentine leukocidin chain S precursor[Staphylococcus aureus subsp. aureus SA957]	NC_022442.1	1534859	1535797	AY954956.1	1e-07	24302	24272	31
CTTTTAATTTTATTAAAGATAAAAGTTATGA	17.889	84	98	1572240	4e-09	182	212	31	lukF-PV	Panton-Valentine leukocidin chain F precursor[Staphylococcus aureus subsp. aureus SA957]	NC_022442.1	1533880	1534857	BA000033.2	1e-07	1530177	1530147	31
CTTTTATATGATCTGTGTTTTTGTAATTGTA	17.889	84	98	1573097	4e-09	295	265	31	lukS-PV	Panton-Valentine leukocidin chain S precursor[Staphylococcus aureus subsp. aureus SA957]	NC_022442.1	1534859	1535797	AY954956.1	1e-07	24383	24353	31
CTTTTATCTTTAATAAAATTAAAAGTTAAAA	17.889	84	98	1572246	4e-09	206	176	31	lukF-PV	Panton-Valentine leukocidin chain F precursor[Staphylococcus aureus subsp. aureus SA957]	NC_022442.1	1533880	1534857	BA000033.2	1e-07	1530153	1530183	31
CTTTTGCTATCCAATACAGTTGATGCAGCTC	17.889	84	98	1572376	4e-09	46	76	31	lukF-PV	Panton-Valentine leukocidin chain F precursor[Staphylococcus aureus subsp. aureus SA957]	NC_022442.1	1533880	1534857	BA000033.2	1e-07	1530313	1530283	31
CTTTTGGATTTGGCTTTGTATAGCCAGAATA	17.889	84	98	1572172	4e-09	280	250	31	lukF-PV	Panton-Valentine leukocidin chain F precursor[Staphylococcus aureus subsp. aureus SA957]	NC_022442.1	1533880	1534857	BA000033.2	1e-07	1530079	1530109	31
CTTTTTATCTTTAACAAAATCAAACTGAATA	17.889	84	98	1573188	4e-09	204	174	31	lukS-PV	Panton-Valentine leukocidin chain S precursor[Staphylococcus aureus subsp. aureus SA957]	NC_022442.1	1534859	1535797	AY954956.1	1e-07	24292	24262	31
CTTTTTCAGAGACAATTAACTATAAACAAGA	17.889	84	98	1571940	4e-09	482	512	31	lukF-PV	Panton-Valentine leukocidin chain F precursor[Staphylococcus aureus subsp. aureus SA957]	NC_022442.1	1533880	1534857	BA000033.2	1e-07	1529877	1529847	31
CTTTTTCATGAGAAACAGTTGCAATAAATGA	17.889	84	98	1572653	4e-09	739	709	31	lukS-PV	Panton-Valentine leukocidin chain S precursor[Staphylococcus aureus subsp. aureus SA957]	NC_022442.1	1534859	1535797	BA000033.2	1e-07	1530560	1530590	31
CTTTTTCTCACTTACAGGTGTGATATGTTGA	17.889	84	98	1572347	4e-09	105	75	31	lukF-PV	Panton-Valentine leukocidin chain F precursor[Staphylococcus aureus subsp. aureus SA957]	NC_022442.1	1533880	1534857	BA000033.2	1e-07	1530254	1530284	31
GAAAATCATACAGTTAAATTAATAGATACTC	17.889	84	98	1571503	4e-09	919	949	31	lukF-PV	Panton-Valentine leukocidin chain F precursor[Staphylococcus aureus subsp. aureus SA957]	NC_022442.1	1533880	1534857	BA000033.2	1e-07	1529440	1529410	31
GAAACAGTTGCAATAAATGAAGGATTGAAAC	17.889	84	98	1572664	4e-09	728	698	31	lukS-PV	Panton-Valentine leukocidin chain S precursor[Staphylococcus aureus subsp. aureus SA957]	NC_022442.1	1534859	1535797	BA000033.2	1e-07	1530571	1530601	31
GAAACGAAGTAGCAATAGGAGTGATTATTCC	17.889	84	98	1573322	4e-09	70	40	31	lukS-PV	Panton-Valentine leukocidin chain S precursor[Staphylococcus aureus subsp. aureus SA957]	NC_022442.1	1534859	1535797	AY954956.1	1e-07	24158	24128	31
GAAATGGATAGATATACAAACTTTTGGAATC	17.889	84	98	1571608	4e-09	814	844	31	lukF-PV	Panton-Valentine leukocidin chain F precursor[Staphylococcus aureus subsp. aureus SA957]	NC_022442.1	1533880	1534857	BA000033.2	1e-07	1529545	1529515	31
GAAGTTGATTCCAAAAGTTTGTATATCTATC	17.889	84	98	1571602	4e-09	850	820	31	lukF-PV	Panton-Valentine leukocidin chain F precursor[Staphylococcus aureus subsp. aureus SA957]	NC_022442.1	1533880	1534857	BA000033.2	1e-07	1529509	1529539	31
GAATGATAACTATCTCTGCCATATGGTCCCC	17.889	84	98	1571823	4e-09	629	599	31	lukF-PV	Panton-Valentine leukocidin chain F precursor[Staphylococcus aureus subsp. aureus SA957]	NC_022442.1	1533880	1534857	BA000033.2	1e-07	1529730	1529760	31
GAATTAATTGAAATGTTGTACTTAGAACCCC	17.889	84	98	1572117	4e-09	335	305	31	lukF-PV	Panton-Valentine leukocidin chain F precursor[Staphylococcus aureus subsp. aureus SA957]	NC_022442.1	1533880	1534857	BA000033.2	1e-07	1530024	1530054	31
GACAAAACTTCTTGGAATATCACAAAATGCC	17.889	84	98	1571739	4e-09	683	713	31	lukF-PV	Panton-Valentine leukocidin chain F precursor[Staphylococcus aureus subsp. aureus SA957]	NC_022442.1	1533880	1534857	BA000033.2	1e-07	1529676	1529646	31
GACCATATGGCAGAGATAGTTATCATTCAAC	17.889	84	98	1571820	4e-09	602	632	31	lukF-PV	Panton-Valentine leukocidin chain F precursor[Staphylococcus aureus subsp. aureus SA957]	NC_022442.1	1533880	1534857	BA000033.2	1e-07	1529757	1529727	31
GAGACCAATATTGTATTGGAAAGGCCACCTC	17.889	84	98	1573062	4e-09	330	300	31	lukS-PV	Panton-Valentine leukocidin chain S precursor[Staphylococcus aureus subsp. aureus SA957]	NC_022442.1	1534859	1535797	AY954956.1	1e-07	24418	24388	31
GAGATATTAATATCTCCACCATAAGAATAAC	17.889	84	98	1572006	4e-09	446	416	31	lukF-PV	Panton-Valentine leukocidin chain F precursor[Staphylococcus aureus subsp. aureus SA957]	NC_022442.1	1533880	1534857	BA000033.2	1e-07	1529913	1529943	31
GAGGTAATGGTTCAAAATCTTTTTCAGAGAC	17.889	84	98	1571958	4e-09	464	494	31	lukF-PV	Panton-Valentine leukocidin chain F precursor[Staphylococcus aureus subsp. aureus SA957]	NC_022442.1	1533880	1534857	BA000033.2	1e-07	1529895	1529865	31
GAGGTAATGGTTCATTTAATTATTCAAAAAC	17.889	84	98	1572907	4e-09	455	485	31	lukS-PV	Panton-Valentine leukocidin chain S precursor[Staphylococcus aureus subsp. aureus SA957]	NC_022442.1	1534859	1535797	AY954956.1	1e-07	24543	24573	31
GATAAAAGTTATGATAAAGATACATTAATAC	17.889	84	98	1572223	4e-09	199	229	31	lukF-PV	Panton-Valentine leukocidin chain F precursor[Staphylococcus aureus subsp. aureus SA957]	NC_022442.1	1533880	1534857	BA000033.2	1e-07	1530160	1530130	31
GATAACTATCTCTGCCATATGGTCCCCAACC	17.889	84	98	1571827	4e-09	625	595	31	lukF-PV	Panton-Valentine leukocidin chain F precursor[Staphylococcus aureus subsp. aureus SA957]	NC_022442.1	1533880	1534857	BA000033.2	1e-07	1529734	1529764	31
GATCATATAAAAGCAATGAGGTGGCCTTTCC	17.889	84	98	1573079	4e-09	283	313	31	lukS-PV	Panton-Valentine leukocidin chain S precursor[Staphylococcus aureus subsp. aureus SA957]	NC_022442.1	1534859	1535797	AY954956.1	1e-07	24371	24401	31
GATGTGATAAATGAATTAGCTTTTATTCCCC	17.889	84	98	1572811	4e-09	581	551	31	lukS-PV	Panton-Valentine leukocidin chain S precursor[Staphylococcus aureus subsp. aureus SA957]	NC_022442.1	1534859	1535797	BA000033.2	1e-07	1530718	1530748	31
GATGTTACTCATGCTACTAGAAGAACAACAC	17.889	84	98	1572575	4e-09	787	817	31	lukS-PV	Panton-Valentine leukocidin chain S precursor[Staphylococcus aureus subsp. aureus SA957]	NC_022442.1	1534859	1535797	BA000033.2	1e-07	1530512	1530482	31
GATTTTTAGGTGCATAATCTACAACGTTTAC	17.889	84	98	1572070	4e-09	382	352	31	lukF-PV	Panton-Valentine leukocidin chain F precursor[Staphylococcus aureus subsp. aureus SA957]	NC_022442.1	1533880	1534857	BA000033.2	1e-07	1529977	1530007	31
GCATTTTGTGATATTCCAAGAAGTTTTGTCC	17.889	84	98	1571740	4e-09	712	682	31	lukF-PV	Panton-Valentine leukocidin chain F precursor[Staphylococcus aureus subsp. aureus SA957]	NC_022442.1	1533880	1534857	BA000033.2	1e-07	1529647	1529677	31
GCGCTGAGGTAGTCAAAAGAACAGAAGATAC	17.889	84	98	1573249	4e-09	113	143	31	lukS-PV	Panton-Valentine leukocidin chain S precursor[Staphylococcus aureus subsp. aureus SA957]	NC_022442.1	1534859	1535797	AY954956.1	1e-07	24201	24231	31
GCGTTGTGTATTCTAGATCCTTCTAAATAAC	17.889	84	98	1572532	4e-09	860	830	31	lukS-PV	Panton-Valentine leukocidin chain S precursor[Staphylococcus aureus subsp. aureus SA957]	NC_022442.1	1534859	1535797	BA000033.2	1e-07	1530439	1530469	31
GCTCAGGAGATACAAGTGAATTTGAAATAAC	17.889	84	98	1572622	4e-09	740	770	31	lukS-PV	Panton-Valentine leukocidin chain S precursor[Staphylococcus aureus subsp. aureus SA957]	NC_022442.1	1534859	1535797	BA000033.2	1e-07	1530559	1530529	31
GCTTTGAGTATTAATGTATCTTTATCATAAC	17.889	84	98	1572216	4e-09	236	206	31	lukF-PV	Panton-Valentine leukocidin chain F precursor[Staphylococcus aureus subsp. aureus SA957]	NC_022442.1	1533880	1534857	BA000033.2	1e-07	1530123	1530153	31
GCTTTGTATAGCCAGAATAAATGTTTCCAGC	17.889	84	98	1572184	4e-09	268	238	31	lukF-PV	Panton-Valentine leukocidin chain F precursor[Staphylococcus aureus subsp. aureus SA957]	NC_022442.1	1533880	1534857	BA000033.2	1e-07	1530091	1530121	31
GGACACCAATAAATTCTGGATTGAAGTTACC	17.889	84	98	1571695	4e-09	757	727	31	lukF-PV	Panton-Valentine leukocidin chain F precursor[Staphylococcus aureus subsp. aureus SA957]	NC_022442.1	1533880	1534857	BA000033.2	1e-07	1529602	1529632	31
GTAATAATTATAAAGATGAAAATAGAGCAAC	17.889	84	98	1571562	4e-09	860	890	31	lukF-PV	Panton-Valentine leukocidin chain F precursor[Staphylococcus aureus subsp. aureus SA957]	NC_022442.1	1533880	1534857	BA000033.2	1e-07	1529499	1529469	31
GTATCTATTAATTTAACTGTATGATTTTCCC	17.889	84	98	1571505	4e-09	947	917	31	lukF-PV	Panton-Valentine leukocidin chain F precursor[Staphylococcus aureus subsp. aureus SA957]	NC_022442.1	1533880	1534857	BA000033.2	1e-07	1529412	1529442	31
GTATTCTAGATCCTTCTAAATAACTATTGCC	17.889	84	98	1572539	4e-09	853	823	31	lukS-PV	Panton-Valentine leukocidin chain S precursor[Staphylococcus aureus subsp. aureus SA957]	NC_022442.1	1534859	1535797	BA000033.2	1e-07	1530446	1530476	31
GTCCAGCATTTAAGTTGCTTTGTCTTGAGCC	17.889	84	98	1571767	4e-09	685	655	31	lukF-PV	Panton-Valentine leukocidin chain F precursor[Staphylococcus aureus subsp. aureus SA957]	NC_022442.1	1533880	1534857	BA000033.2	1e-07	1529674	1529704	31
GTTATACTTTTTATCTTTAACAAAATCAAAC	17.889	84	98	1573182	4e-09	210	180	31	lukS-PV	Panton-Valentine leukocidin chain S precursor[Staphylococcus aureus subsp. aureus SA957]	NC_022442.1	1534859	1535797	AY954956.1	1e-07	24298	24268	31
TAAAAACATTTCATTACCATAAGTTGAATGA	17.889	84	98	1571798	4e-09	654	624	31	lukF-PV	Panton-Valentine leukocidin chain F precursor[Staphylococcus aureus subsp. aureus SA957]	NC_022442.1	1533880	1534857	BA000033.2	1e-07	1529705	1529735	31
TAAAAAGTATAACAAAGACGCTTTGATTTTA	17.889	84	98	1573164	4e-09	198	228	31	lukS-PV	Panton-Valentine leukocidin chain S precursor[Staphylococcus aureus subsp. aureus SA957]	NC_022442.1	1534859	1535797	AY954956.1	1e-07	24286	24316	31
TAAAAATCAAAATGAAGAATTTCAAGTACAA	17.889	84	98	1572047	4e-09	375	405	31	lukF-PV	Panton-Valentine leukocidin chain F precursor[Staphylococcus aureus subsp. aureus SA957]	NC_022442.1	1533880	1534857	BA000033.2	1e-07	1529984	1529954	31
TAAAAATGCAAGGTTTTATCAATTCAAAGAC	17.889	84	98	1573135	4e-09	227	257	31	lukS-PV	Panton-Valentine leukocidin chain S precursor[Staphylococcus aureus subsp. aureus SA957]	NC_022442.1	1534859	1535797	AY954956.1	1e-07	24315	24345	31
TAAAACCTTGCATTTTTAAAATCAAAGCGTC	17.889	84	98	1573148	4e-09	244	214	31	lukS-PV	Panton-Valentine leukocidin chain S precursor[Staphylococcus aureus subsp. aureus SA957]	NC_022442.1	1534859	1535797	AY954956.1	1e-07	24332	24302	31
TAAAAGCAATGAGGTGGCCTTTCCAATACAA	17.889	84	98	1573072	4e-09	290	320	31	lukS-PV	Panton-Valentine leukocidin chain S precursor[Staphylococcus aureus subsp. aureus SA957]	NC_022442.1	1534859	1535797	AY954956.1	1e-07	24378	24408	31
TAAAAGTTATGATAAAGATACATTAATACTC	17.889	84	98	1572221	4e-09	201	231	31	lukF-PV	Panton-Valentine leukocidin chain F precursor[Staphylococcus aureus subsp. aureus SA957]	NC_022442.1	1533880	1534857	BA000033.2	1e-07	1530158	1530128	31
TAAAATAGATTCAGTAAATGTTAGTCAAACA	17.889	84	98	1572984	4e-09	378	408	31	lukS-PV	Panton-Valentine leukocidin chain S precursor[Staphylococcus aureus subsp. aureus SA957]	NC_022442.1	1534859	1535797	AY954956.1	1e-07	24466	24496	31
TAAAATCTGAGAAATTTTTAACTTATCGGAA	17.889	84	98	1572272	4e-09	180	150	31	lukF-PV	Panton-Valentine leukocidin chain F precursor[Staphylococcus aureus subsp. aureus SA957]	NC_022442.1	1533880	1534857	BA000033.2	1e-07	1530179	1530209	31
TAAAATTTACAAACACTTTCTTTCTATATTA	17.889	84	98	1571411	0.017	69	47	23	SAZ172_0994	GNAT family acetyltransferase YjcF[Staphylococcus aureus subsp. aureus Z172]	NC_022604.1	1077258	1077692	BA000033.2	1e-07	1529348	1529318	31
TAAACGTTGTAGATTATGCACCTAAAAATCA	17.889	84	98	1572069	4e-09	353	383	31	lukF-PV	Panton-Valentine leukocidin chain F precursor[Staphylococcus aureus subsp. aureus SA957]	NC_022442.1	1533880	1534857	BA000033.2	1e-07	1530006	1529976	31
TAAAGATAAAAGTTATGATAAAGATACATTA	17.889	84	98	1572227	4e-09	195	225	31	lukF-PV	Panton-Valentine leukocidin chain F precursor[Staphylococcus aureus subsp. aureus SA957]	NC_022442.1	1533880	1534857	BA000033.2	1e-07	1530164	1530134	31
TAAAGATACATTAATACTCAAAGCTGCTGGA	17.889	84	98	1572209	4e-09	213	243	31	lukF-PV	Panton-Valentine leukocidin chain F precursor[Staphylococcus aureus subsp. aureus SA957]	NC_022442.1	1533880	1534857	BA000033.2	1e-07	1530146	1530116	31
TAAAGTGAAAGGACATAATTGATATGAAAAA	17.889	84	98	1572444	0.0004	918	939	22	lukS-PV	Panton-Valentine leukocidin chain S precursor[Staphylococcus aureus subsp. aureus SA957]	NC_022442.1	1534859	1535797	BA000033.2	1e-07	1530381	1530351	31
TAAATATGAAGTGAACTGGAAAACTCATGAA	17.889	84	98	1572477	4e-09	885	915	31	lukS-PV	Panton-Valentine leukocidin chain S precursor[Staphylococcus aureus subsp. aureus SA957]	NC_022442.1	1534859	1535797	BA000033.2	1e-07	1530414	1530384	31
TAAATGAACCATTACCTCCTGTTGATGGACC	17.889	84	98	1572920	4e-09	472	442	31	lukS-PV	Panton-Valentine leukocidin chain S precursor[Staphylococcus aureus subsp. aureus SA957]	NC_022442.1	1534859	1535797	AY954956.1	1e-07	24560	24530	31
TAAATGAAGGATTGAAACCACTGTGTACTAA	17.889	84	98	1572677	4e-09	715	685	31	lukS-PV	Panton-Valentine leukocidin chain S precursor[Staphylococcus aureus subsp. aureus SA957]	NC_022442.1	1534859	1535797	BA000033.2	1e-07	1530584	1530614	31
TAAATGAATTAGCTTTTATTCCCCATTGAAC	17.889	84	98	1572818	4e-09	574	544	31	lukS-PV	Panton-Valentine leukocidin chain S precursor[Staphylococcus aureus subsp. aureus SA957]	NC_022442.1	1534859	1535797	BA000033.2	1e-07	1530725	1530755	31
TAAATGCTGGACAAAACTTCTTGGAATATCA	17.889	84	98	1571748	4e-09	674	704	31	lukF-PV	Panton-Valentine leukocidin chain F precursor[Staphylococcus aureus subsp. aureus SA957]	NC_022442.1	1533880	1534857	BA000033.2	1e-07	1529685	1529655	31
TAAATTAATAGATACTCAATCTAAGGAAAAA	17.889	84	98	1571489	4e-09	933	963	31	lukF-PV	Panton-Valentine leukocidin chain F precursor[Staphylococcus aureus subsp. aureus SA957]	NC_022442.1	1533880	1534857	BA000033.2	1e-07	1529426	1529396	31
TAAATTCTGGATTGAAGTTACCTCTGGATAA	17.889	84	98	1571704	4e-09	748	718	31	lukF-PV	Panton-Valentine leukocidin chain F precursor[Staphylococcus aureus subsp. aureus SA957]	NC_022442.1	1533880	1534857	BA000033.2	1e-07	1529611	1529641	31
TAACAAAATCAAACTGAATATTTTGTGTGAC	17.889	84	98	1573199	4e-09	193	163	31	lukS-PV	Panton-Valentine leukocidin chain S precursor[Staphylococcus aureus subsp. aureus SA957]	NC_022442.1	1534859	1535797	AY954956.1	1e-07	24281	24251	31
TAACAAAGACGCTTTGATTTTAAAAATGCAA	17.889	84	98	1573155	4e-09	207	237	31	lukS-PV	Panton-Valentine leukocidin chain S precursor[Staphylococcus aureus subsp. aureus SA957]	NC_022442.1	1534859	1535797	AY954956.1	1e-07	24295	24325	31
TAACATAGGTGGTAATTTTAATAGTGGTCCA	17.889	84	98	1572945	4e-09	417	447	31	lukS-PV	Panton-Valentine leukocidin chain S precursor[Staphylococcus aureus subsp. aureus SA957]	NC_022442.1	1534859	1535797	AY954956.1	1e-07	24505	24535	31
TAACATATTTAAGATTTTTTGATTATCTATC	17.889	84	98	1571440	0.22	1401	1377	28	SLUG_15830	putative cardiolipin synthase[Staphylococcus lugdunensis N920143]	NC_017353.1	1657515	1658996	BA000033.2	1e-07	1529347	1529377	31
TAACATCCATATTTCTGCCATACGTTATTTC	17.889	84	98	1572599	4e-09	793	763	31	lukS-PV	Panton-Valentine leukocidin chain S precursor[Staphylococcus aureus subsp. aureus SA957]	NC_022442.1	1534859	1535797	BA000033.2	1e-07	1530506	1530536	31
TAACCACGTCAATTAAGACGTGGTTACCCTA	17.889	84	98	1571382	8e-06	164	188	25	MS7_0645	pyridine nucleotide-disulfide oxidoreductase family protein[Staphylococcus aureus subsp. aureus 11819-97]	NC_017351.1	686824	687024	BA000033.2	1e-07	1529289	1529319	31
TAACGTATGGCAGAAATATGGATGTTACTCA	17.889	84	98	1572595	4e-09	767	797	31	lukS-PV	Panton-Valentine leukocidin chain S precursor[Staphylococcus aureus subsp. aureus SA957]	NC_022442.1	1534859	1535797	BA000033.2	1e-07	1530532	1530502	31
TAACTAATTGTTTTTGAATAATTAAATGAAC	17.889	84	98	1572898	4e-09	494	464	31	lukS-PV	Panton-Valentine leukocidin chain S precursor[Staphylococcus aureus subsp. aureus SA957]	NC_022442.1	1534859	1535797	AY954956.1	1e-07	24582	24552	31
TAACTATAAACAAGAAAGCTATAGAACTAGC	17.889	84	98	1571924	4e-09	498	528	31	lukF-PV	Panton-Valentine leukocidin chain F precursor[Staphylococcus aureus subsp. aureus SA957]	NC_022442.1	1533880	1534857	BA000033.2	1e-07	1529861	1529831	31
TAACTGTATGATTTTCCCAATCAACTTCATA	17.889	84	98	1571518	4e-09	934	904	31	lukF-PV	Panton-Valentine leukocidin chain F precursor[Staphylococcus aureus subsp. aureus SA957]	NC_022442.1	1533880	1534857	BA000033.2	1e-07	1529425	1529455	31
TAACTTCAATCCAGAATTTATTGGTGTCCTA	17.889	84	98	1571693	4e-09	729	759	31	lukF-PV	Panton-Valentine leukocidin chain F precursor[Staphylococcus aureus subsp. aureus SA957]	NC_022442.1	1533880	1534857	BA000033.2	1e-07	1529630	1529600	31
TAACTTTTAATTTTATTAAAGATAAAAGTTA	17.889	84	98	1572243	4e-09	179	209	31	lukF-PV	Panton-Valentine leukocidin chain F precursor[Staphylococcus aureus subsp. aureus SA957]	NC_022442.1	1533880	1534857	BA000033.2	1e-07	1530180	1530150	31
TAAGAATAACCTACCGTTTGTTGTACTTGAA	17.889	84	98	1572027	4e-09	425	395	31	lukF-PV	Panton-Valentine leukocidin chain F precursor[Staphylococcus aureus subsp. aureus SA957]	NC_022442.1	1533880	1534857	BA000033.2	1e-07	1529934	1529964	31
TAAGACGTGGTTACCCTAATATAGAAAGAAA	17.889	84	98	1571395	NA	NA	NA	NA	NA	NA	NA	NA	NA	BA000033.2	1e-07	1529302	1529332	31
TAAGTAGTCTTTGAATTGATAAAACCTTGCA	17.889	84	98	1573129	4e-09	263	233	31	lukS-PV	Panton-Valentine leukocidin chain S precursor[Staphylococcus aureus subsp. aureus SA957]	NC_022442.1	1534859	1535797	AY954956.1	1e-07	24351	24321	31
TAAGTGAGAAAAAGGTTGATGATAAAATTAC	17.889	84	98	1572330	4e-09	92	122	31	lukF-PV	Panton-Valentine leukocidin chain F precursor[Staphylococcus aureus subsp. aureus SA957]	NC_022442.1	1533880	1534857	BA000033.2	1e-07	1530267	1530237	31
TAATACTCAAAGCTGCTGGAAACATTTATTC	17.889	84	98	1572198	4e-09	224	254	31	lukF-PV	Panton-Valentine leukocidin chain F precursor[Staphylococcus aureus subsp. aureus SA957]	NC_022442.1	1533880	1534857	BA000033.2	1e-07	1530135	1530105	31
TAATAGATACTCAATCTAAGGAAAAAAATCC	17.889	84	98	1571484	4e-09	938	968	31	lukF-PV	Panton-Valentine leukocidin chain F precursor[Staphylococcus aureus subsp. aureus SA957]	NC_022442.1	1533880	1534857	BA000033.2	1e-07	1529421	1529391	31
TAATAGTGTCTTTTGGATTTGGCTTTGTATA	17.889	84	98	1572163	4e-09	289	259	31	lukF-PV	Panton-Valentine leukocidin chain F precursor[Staphylococcus aureus subsp. aureus SA957]	NC_022442.1	1533880	1534857	BA000033.2	1e-07	1530070	1530100	31
TAATCAACAAAACTATATCAGTGAAGTAGAA	17.889	84	98	1572867	4e-09	495	525	31	lukS-PV	Panton-Valentine leukocidin chain S precursor[Staphylococcus aureus subsp. aureus SA957]	NC_022442.1	1534859	1535797	BA000033.2	1e-07	1530804	1530774	31
TAATCACTCCTATTGCTACTTCGTTTCATGA	17.889	84	98	1573318	4e-09	44	74	31	lukS-PV	Panton-Valentine leukocidin chain S precursor[Staphylococcus aureus subsp. aureus SA957]	NC_022442.1	1534859	1535797	AY954956.1	1e-07	24132	24162	31
TAATGAAATGTTTTTAGGCTCAAGACAAAGC	17.889	84	98	1571783	4e-09	639	669	31	lukF-PV	Panton-Valentine leukocidin chain F precursor[Staphylococcus aureus subsp. aureus SA957]	NC_022442.1	1533880	1534857	BA000033.2	1e-07	1529720	1529690	31
TAATGACTCAGTAAACGTTGTAGATTATGCA	17.889	84	98	1572080	4e-09	342	372	31	lukF-PV	Panton-Valentine leukocidin chain F precursor[Staphylococcus aureus subsp. aureus SA957]	NC_022442.1	1533880	1534857	BA000033.2	1e-07	1530017	1529987	31
TAATTATTACCTATCCAGTGAAGTTGATTCC	17.889	84	98	1571583	4e-09	869	839	31	lukF-PV	Panton-Valentine leukocidin chain F precursor[Staphylococcus aureus subsp. aureus SA957]	NC_022442.1	1533880	1534857	BA000033.2	1e-07	1529490	1529520	31
TAATTATTCAAAAACAATTAGTTATAATCAA	17.889	84	98	1572891	4e-09	471	501	31	lukS-PV	Panton-Valentine leukocidin chain S precursor[Staphylococcus aureus subsp. aureus SA957]	NC_022442.1	1534859	1535797	BA000033.2	1e-07	1530828	1530798	31
TAATTGAAATGTTGTACTTAGAACCCCAATA	17.889	84	98	1572121	4e-09	331	301	31	lukF-PV	Panton-Valentine leukocidin chain F precursor[Staphylococcus aureus subsp. aureus SA957]	NC_022442.1	1533880	1534857	BA000033.2	1e-07	1530028	1530058	31
TAATTGATATGAAAAAAATAGTCAAATCATC	17.889	84	98	1572429	0.0001	1	23	23	lukF-PV	Panton-Valentine leukocidin chain F precursor[Staphylococcus aureus subsp. aureus SA957]	NC_022442.1	1533880	1534857	BA000033.2	1e-07	1530366	1530336	31
TAATTGTAATAAGTAGTCTTTGAATTGATAA	17.889	84	98	1573120	4e-09	272	242	31	lukS-PV	Panton-Valentine leukocidin chain S precursor[Staphylococcus aureus subsp. aureus SA957]	NC_022442.1	1534859	1535797	AY954956.1	1e-07	24360	24330	31
TAATTTCAAAAAAATTGGTTGGGATGTTGAA	17.889	84	98	1571879	4e-09	543	573	31	lukF-PV	Panton-Valentine leukocidin chain F precursor[Staphylococcus aureus subsp. aureus SA957]	NC_022442.1	1533880	1534857	BA000033.2	1e-07	1529816	1529786	31
TAATTTCATGAGTTTTCCAGTTCACTTCATA	17.889	84	98	1572473	4e-09	919	889	31	lukS-PV	Panton-Valentine leukocidin chain S precursor[Staphylococcus aureus subsp. aureus SA957]	NC_022442.1	1534859	1535797	BA000033.2	1e-07	1530380	1530410	31
TAATTTCTGTTTACAAATGCGTTGTGTATTC	17.889	84	98	1572514	4e-09	878	848	31	lukS-PV	Panton-Valentine leukocidin chain S precursor[Staphylococcus aureus subsp. aureus SA957]	NC_022442.1	1534859	1535797	BA000033.2	1e-07	1530421	1530451	31
TAATTTTATCATCAACCTTTTTCTCACTTAC	17.889	84	98	1572331	4e-09	121	91	31	lukF-PV	Panton-Valentine leukocidin chain F precursor[Staphylococcus aureus subsp. aureus SA957]	NC_022442.1	1533880	1534857	BA000033.2	1e-07	1530238	1530268	31
TAATTTTATTAAAGATAAAAGTTATGATAAA	17.889	84	98	1572236	4e-09	186	216	31	lukF-PV	Panton-Valentine leukocidin chain F precursor[Staphylococcus aureus subsp. aureus SA957]	NC_022442.1	1533880	1534857	BA000033.2	1e-07	1530173	1530143	31
TACAAAAACACAGATCATATAAAAGCAATGA	17.889	84	98	1573091	4e-09	271	301	31	lukS-PV	Panton-Valentine leukocidin chain S precursor[Staphylococcus aureus subsp. aureus SA957]	NC_022442.1	1534859	1535797	AY954956.1	1e-07	24359	24389	31
TACAAAACAACTGCAACATCAGATTCCGATA	17.889	84	98	1572295	4e-09	127	157	31	lukF-PV	Panton-Valentine leukocidin chain F precursor[Staphylococcus aureus subsp. aureus SA957]	NC_022442.1	1533880	1534857	BA000033.2	1e-07	1530232	1530202	31
TACAAACACTTTCTTTCTATATTAGGGTAAC	17.889	84	98	1571404	0.017	69	47	23	SAZ172_0994	GNAT family acetyltransferase YjcF[Staphylococcus aureus subsp. aureus Z172]	NC_022604.1	1077258	1077692	BA000033.2	1e-07	1529341	1529311	31
TACAAACTTTTGGAATCAACTTCACTGGATA	17.889	84	98	1571594	4e-09	828	858	31	lukF-PV	Panton-Valentine leukocidin chain F precursor[Staphylococcus aureus subsp. aureus SA957]	NC_022442.1	1533880	1534857	BA000033.2	1e-07	1529531	1529501	31
TACAACGTTTACTGAGTCATTAGAATCTGAA	17.889	84	98	1572089	4e-09	363	333	31	lukF-PV	Panton-Valentine leukocidin chain F precursor[Staphylococcus aureus subsp. aureus SA957]	NC_022442.1	1533880	1534857	BA000033.2	1e-07	1529996	1530026	31
TACAAGTGAATTTGAAATAACGTATGGCAGA	17.889	84	98	1572612	4e-09	750	780	31	lukS-PV	Panton-Valentine leukocidin chain S precursor[Staphylococcus aureus subsp. aureus SA957]	NC_022442.1	1534859	1535797	BA000033.2	1e-07	1530549	1530519	31
TACACAACGCATTTGTAAACAGAAATTACAC	17.889	84	98	1572511	4e-09	851	881	31	lukS-PV	Panton-Valentine leukocidin chain S precursor[Staphylococcus aureus subsp. aureus SA957]	NC_022442.1	1534859	1535797	BA000033.2	1e-07	1530448	1530418	31
TACACAGTGGTTTCAATCCTTCATTTATTGC	17.889	84	98	1572673	4e-09	689	719	31	lukS-PV	Panton-Valentine leukocidin chain S precursor[Staphylococcus aureus subsp. aureus SA957]	NC_022442.1	1534859	1535797	BA000033.2	1e-07	1530610	1530580	31
TACACAGTTAAATATGAAGTGAACTGGAAAA	17.889	84	98	1572485	4e-09	877	907	31	lukS-PV	Panton-Valentine leukocidin chain S precursor[Staphylococcus aureus subsp. aureus SA957]	NC_022442.1	1534859	1535797	BA000033.2	1e-07	1530422	1530392	31
TACCATAAGTTGAATGATAACTATCTCTGCC	17.889	84	98	1571812	4e-09	640	610	31	lukF-PV	Panton-Valentine leukocidin chain F precursor[Staphylococcus aureus subsp. aureus SA957]	NC_022442.1	1533880	1534857	BA000033.2	1e-07	1529719	1529749	31
TACCCCCATTAGTACACAGTGGTTTCAATCC	17.889	84	98	1572685	4e-09	677	707	31	lukS-PV	Panton-Valentine leukocidin chain S precursor[Staphylococcus aureus subsp. aureus SA957]	NC_022442.1	1534859	1535797	BA000033.2	1e-07	1530622	1530592	31
TACCCTAATATAGAAAGAAAGTGTTTGTAAA	17.889	84	98	1571406	0.017	47	69	23	SAZ172_0994	GNAT family acetyltransferase YjcF[Staphylococcus aureus subsp. aureus Z172]	NC_022604.1	1077258	1077692	BA000033.2	1e-07	1529313	1529343	31
TACCTCAGCGCCATCACCAATATTCTCAATA	17.889	84	98	1573269	4e-09	123	93	31	lukS-PV	Panton-Valentine leukocidin chain S precursor[Staphylococcus aureus subsp. aureus SA957]	NC_022442.1	1534859	1535797	AY954956.1	1e-07	24211	24181	31
TACCTCTGGATAACACTGGCATTTTGTGATA	17.889	84	98	1571722	4e-09	730	700	31	lukF-PV	Panton-Valentine leukocidin chain F precursor[Staphylococcus aureus subsp. aureus SA957]	NC_022442.1	1533880	1534857	BA000033.2	1e-07	1529629	1529659	31
TACTCAATCTAAGGAAAAAAATCCTATGAGC	17.889	84	98	1571477	4e-09	945	975	31	lukF-PV	Panton-Valentine leukocidin chain F precursor[Staphylococcus aureus subsp. aureus SA957]	NC_022442.1	1533880	1534857	BA000033.2	1e-07	1529414	1529384	31
TACTGAGTCATTAGAATCTGAATTAATTGAA	17.889	84	98	1572098	4e-09	354	324	31	lukF-PV	Panton-Valentine leukocidin chain F precursor[Staphylococcus aureus subsp. aureus SA957]	NC_022442.1	1533880	1534857	BA000033.2	1e-07	1530005	1530035	31
TACTGTTACTTATCAAAGAGAAATGGATAGA	17.889	84	98	1571627	4e-09	795	825	31	lukF-PV	Panton-Valentine leukocidin chain F precursor[Staphylococcus aureus subsp. aureus SA957]	NC_022442.1	1533880	1534857	BA000033.2	1e-07	1529564	1529534	31
TACTTAGAACCCCAATAAAATTGAGAACTAA	17.889	84	98	1572135	4e-09	317	287	31	lukF-PV	Panton-Valentine leukocidin chain F precursor[Staphylococcus aureus subsp. aureus SA957]	NC_022442.1	1533880	1534857	BA000033.2	1e-07	1530042	1530072	31
TACTTATCAAAGAGAAATGGATAGATATACA	17.889	84	98	1571621	4e-09	801	831	31	lukF-PV	Panton-Valentine leukocidin chain F precursor[Staphylococcus aureus subsp. aureus SA957]	NC_022442.1	1533880	1534857	BA000033.2	1e-07	1529558	1529528	31
TACTTCACTGATATAGTTTTGTTGATTATAA	17.889	84	98	1572870	4e-09	522	492	31	lukS-PV	Panton-Valentine leukocidin chain S precursor[Staphylococcus aureus subsp. aureus SA957]	NC_022442.1	1534859	1535797	BA000033.2	1e-07	1530777	1530807	31
TACTTCGTTTCATGAATCTAAAGCTGATAAC	17.889	84	98	1573302	4e-09	60	90	31	lukS-PV	Panton-Valentine leukocidin chain S precursor[Staphylococcus aureus subsp. aureus SA957]	NC_022442.1	1534859	1535797	AY954956.1	1e-07	24148	24178	31
TACTTGTATCTTCTGTTCTTTTGACTACCTC	17.889	84	98	1573244	4e-09	148	118	31	lukS-PV	Panton-Valentine leukocidin chain S precursor[Staphylococcus aureus subsp. aureus SA957]	NC_022442.1	1534859	1535797	AY954956.1	1e-07	24236	24206	31
TACTTTTTATCTTTAACAAAATCAAACTGAA	17.889	84	98	1573186	4e-09	206	176	31	lukS-PV	Panton-Valentine leukocidin chain S precursor[Staphylococcus aureus subsp. aureus SA957]	NC_022442.1	1534859	1535797	AY954956.1	1e-07	24294	24264	31
TAGAACTAGCTTAGATAAAAGAACTAATTTC	17.889	84	98	1571903	4e-09	519	549	31	lukF-PV	Panton-Valentine leukocidin chain F precursor[Staphylococcus aureus subsp. aureus SA957]	NC_022442.1	1533880	1534857	BA000033.2	1e-07	1529840	1529810	31
TAGATAATCAAAAAATCTTAAATATGTTAAA	17.889	84	98	1571438	0.061	1377	1402	29	SLUG_15830	putative cardiolipin synthase[Staphylococcus lugdunensis N920143]	NC_017353.1	1657515	1658996	BA000033.2	1e-07	1529375	1529345	31
TAGATATACAAACTTTTGGAATCAACTTCAC	17.889	84	98	1571600	4e-09	822	852	31	lukF-PV	Panton-Valentine leukocidin chain F precursor[Staphylococcus aureus subsp. aureus SA957]	NC_022442.1	1533880	1534857	BA000033.2	1e-07	1529537	1529507	31
TAGATTATGCACCTAAAAATCAAAATGAAGA	17.889	84	98	1572060	4e-09	362	392	31	lukF-PV	Panton-Valentine leukocidin chain F precursor[Staphylococcus aureus subsp. aureus SA957]	NC_022442.1	1533880	1534857	BA000033.2	1e-07	1529997	1529967	31
TAGCAATAGGAGTGATTATTCCTAACGACAA	17.889	84	98	1573331	4e-09	61	31	31	lukS-PV	Panton-Valentine leukocidin chain S precursor[Staphylococcus aureus subsp. aureus SA957]	NC_022442.1	1534859	1535797	AY954956.1	1e-07	24149	24119	31
TAGCCAGAATAAATGTTTCCAGCAGCTTTGA	17.889	84	98	1572192	4e-09	260	230	31	lukF-PV	Panton-Valentine leukocidin chain F precursor[Staphylococcus aureus subsp. aureus SA957]	NC_022442.1	1533880	1534857	BA000033.2	1e-07	1530099	1530129	31
TAGCTTAGATAAAAGAACTAATTTCAAAAAA	17.889	84	98	1571897	4e-09	525	555	31	lukF-PV	Panton-Valentine leukocidin chain F precursor[Staphylococcus aureus subsp. aureus SA957]	NC_022442.1	1533880	1534857	BA000033.2	1e-07	1529834	1529804	31
TAGCTTTTATTCCCCATTGAACACTTTTTGA	17.889	84	98	1572827	4e-09	565	535	31	lukS-PV	Panton-Valentine leukocidin chain S precursor[Staphylococcus aureus subsp. aureus SA957]	NC_022442.1	1534859	1535797	BA000033.2	1e-07	1530734	1530764	31
TAGGTAATAATTATAAAGATGAAAATAGAGC	17.889	84	98	1571565	4e-09	857	887	31	lukF-PV	Panton-Valentine leukocidin chain F precursor[Staphylococcus aureus subsp. aureus SA957]	NC_022442.1	1533880	1534857	BA000033.2	1e-07	1529502	1529472	31
TAGGTGCATAATCTACAACGTTTACTGAGTC	17.889	84	98	1572076	4e-09	376	346	31	lukF-PV	Panton-Valentine leukocidin chain F precursor[Staphylococcus aureus subsp. aureus SA957]	NC_022442.1	1533880	1534857	BA000033.2	1e-07	1529983	1530013	31
TAGGTGGTAATTTTAATAGTGGTCCATCAAC	17.889	84	98	1572940	4e-09	422	452	31	lukS-PV	Panton-Valentine leukocidin chain S precursor[Staphylococcus aureus subsp. aureus SA957]	NC_022442.1	1534859	1535797	AY954956.1	1e-07	24510	24540	31
TAGTAGCATGAGTAACATCCATATTTCTGCC	17.889	84	98	1572587	4e-09	805	775	31	lukS-PV	Panton-Valentine leukocidin chain S precursor[Staphylococcus aureus subsp. aureus SA957]	NC_022442.1	1534859	1535797	BA000033.2	1e-07	1530494	1530524	31
TAGTCAAATCATCAGTTGTTACATCAATTGC	17.889	84	98	1572411	4e-09	11	41	31	lukF-PV	Panton-Valentine leukocidin chain F precursor[Staphylococcus aureus subsp. aureus SA957]	NC_022442.1	1533880	1534857	BA000033.2	1e-07	1530348	1530318	31
TAGTGGTCCATCAACAGGAGGTAATGGTTCA	17.889	84	98	1572924	4e-09	438	468	31	lukS-PV	Panton-Valentine leukocidin chain S precursor[Staphylococcus aureus subsp. aureus SA957]	NC_022442.1	1534859	1535797	AY954956.1	1e-07	24526	24556	31
TAGTGTCTTTTGGATTTGGCTTTGTATAGCC	17.889	84	98	1572166	4e-09	286	256	31	lukF-PV	Panton-Valentine leukocidin chain F precursor[Staphylococcus aureus subsp. aureus SA957]	NC_022442.1	1533880	1534857	BA000033.2	1e-07	1530073	1530103	31
TAGTGTGTTGTTCTTCTAGTAGCATGAGTAA	17.889	84	98	1572571	4e-09	821	791	31	lukS-PV	Panton-Valentine leukocidin chain S precursor[Staphylococcus aureus subsp. aureus SA957]	NC_022442.1	1534859	1535797	BA000033.2	1e-07	1530478	1530508	31
TAGTTAATTGTCTCTGAAAAAGATTTTGAAC	17.889	84	98	1571949	4e-09	503	473	31	lukF-PV	Panton-Valentine leukocidin chain F precursor[Staphylococcus aureus subsp. aureus SA957]	NC_022442.1	1533880	1534857	BA000033.2	1e-07	1529856	1529886	31
TAGTTATAATCAACAAAACTATATCAGTGAA	17.889	84	98	1572873	4e-09	489	519	31	lukS-PV	Panton-Valentine leukocidin chain S precursor[Staphylococcus aureus subsp. aureus SA957]	NC_022442.1	1534859	1535797	BA000033.2	1e-07	1530810	1530780	31
TAGTTATTTAGAAGGATCTAGAATACACAAC	17.889	84	98	1572534	4e-09	828	858	31	lukS-PV	Panton-Valentine leukocidin chain S precursor[Staphylococcus aureus subsp. aureus SA957]	NC_022442.1	1534859	1535797	BA000033.2	1e-07	1530471	1530441	31
TAGTTCTCAATTTTATTGGGGTTCTAAGTAC	17.889	84	98	1572134	4e-09	288	318	31	lukF-PV	Panton-Valentine leukocidin chain F precursor[Staphylococcus aureus subsp. aureus SA957]	NC_022442.1	1533880	1534857	BA000033.2	1e-07	1530071	1530041	31
TATAAAAGCAATGAGGTGGCCTTTCCAATAC	17.889	84	98	1573074	4e-09	288	318	31	lukS-PV	Panton-Valentine leukocidin chain S precursor[Staphylococcus aureus subsp. aureus SA957]	NC_022442.1	1534859	1535797	AY954956.1	1e-07	24376	24406	31
TATAACAAAGACGCTTTGATTTTAAAAATGC	17.889	84	98	1573157	4e-09	205	235	31	lukS-PV	Panton-Valentine leukocidin chain S precursor[Staphylococcus aureus subsp. aureus SA957]	NC_022442.1	1534859	1535797	AY954956.1	1e-07	24293	24323	31
TATAACATAGGTGGTAATTTTAATAGTGGTC	17.889	84	98	1572947	4e-09	415	445	31	lukS-PV	Panton-Valentine leukocidin chain S precursor[Staphylococcus aureus subsp. aureus SA957]	NC_022442.1	1534859	1535797	AY954956.1	1e-07	24503	24533	31
TATAACCTAATGTTTGACTAACATTTACTGA	17.889	84	98	1572974	4e-09	418	388	31	lukS-PV	Panton-Valentine leukocidin chain S precursor[Staphylococcus aureus subsp. aureus SA957]	NC_022442.1	1534859	1535797	AY954956.1	1e-07	24506	24476	31
TATAACTAATTGTTTTTGAATAATTAAATGA	17.889	84	98	1572896	4e-09	496	466	31	lukS-PV	Panton-Valentine leukocidin chain S precursor[Staphylococcus aureus subsp. aureus SA957]	NC_022442.1	1534859	1535797	AY954956.1	1e-07	24584	24554	31
TATACAAACTTTTGGAATCAACTTCACTGGA	17.889	84	98	1571596	4e-09	826	856	31	lukF-PV	Panton-Valentine leukocidin chain F precursor[Staphylococcus aureus subsp. aureus SA957]	NC_022442.1	1533880	1534857	BA000033.2	1e-07	1529533	1529503	31
TATAGAAAGAAAGTGTTTGTAAATTTTAACA	17.889	84	98	1571414	0.061	48	69	22	SAZ172_0994	GNAT family acetyltransferase YjcF[Staphylococcus aureus subsp. aureus Z172]	NC_022604.1	1077258	1077692	BA000033.2	1e-07	1529321	1529351	31
TATAGCTTTCTTGTTTATAGTTAATTGTCTC	17.889	84	98	1571932	4e-09	520	490	31	lukF-PV	Panton-Valentine leukocidin chain F precursor[Staphylococcus aureus subsp. aureus SA957]	NC_022442.1	1533880	1534857	BA000033.2	1e-07	1529839	1529869	31
TATAGTTAATTGTCTCTGAAAAAGATTTTGA	17.889	84	98	1571947	4e-09	505	475	31	lukF-PV	Panton-Valentine leukocidin chain F precursor[Staphylococcus aureus subsp. aureus SA957]	NC_022442.1	1533880	1534857	BA000033.2	1e-07	1529854	1529884	31
TATATCCAACAAATAAATTTGGATCATGTCC	17.889	84	98	1572764	4e-09	628	598	31	lukS-PV	Panton-Valentine leukocidin chain S precursor[Staphylococcus aureus subsp. aureus SA957]	NC_022442.1	1534859	1535797	BA000033.2	1e-07	1530671	1530701	31
TATATCTATCCATTTCTCTTTGATAAGTAAC	17.889	84	98	1571623	4e-09	829	799	31	lukF-PV	Panton-Valentine leukocidin chain F precursor[Staphylococcus aureus subsp. aureus SA957]	NC_022442.1	1533880	1534857	BA000033.2	1e-07	1529530	1529560	31
TATATGATCTGTGTTTTTGTAATTGTAATAA	17.889	84	98	1573101	4e-09	291	261	31	lukS-PV	Panton-Valentine leukocidin chain S precursor[Staphylococcus aureus subsp. aureus SA957]	NC_022442.1	1534859	1535797	AY954956.1	1e-07	24379	24349	31
TATCAATTCAAAGACTACTTATTACAATTAC	17.889	84	98	1573119	4e-09	243	273	31	lukS-PV	Panton-Valentine leukocidin chain S precursor[Staphylococcus aureus subsp. aureus SA957]	NC_022442.1	1534859	1535797	AY954956.1	1e-07	24331	24361	31
TATCAGCTTTAGATTCATGAAACGAAGTAGC	17.889	84	98	1573304	4e-09	88	58	31	lukS-PV	Panton-Valentine leukocidin chain S precursor[Staphylococcus aureus subsp. aureus SA957]	NC_022442.1	1534859	1535797	AY954956.1	1e-07	24176	24146	31
TATCATAACTTTTATCTTTAATAAAATTAAA	17.889	84	98	1572238	4e-09	214	184	31	lukF-PV	Panton-Valentine leukocidin chain F precursor[Staphylococcus aureus subsp. aureus SA957]	NC_022442.1	1533880	1534857	BA000033.2	1e-07	1530145	1530175	31
TATCTATTAATTTAACTGTATGATTTTCCCA	17.889	84	98	1571506	4e-09	946	916	31	lukF-PV	Panton-Valentine leukocidin chain F precursor[Staphylococcus aureus subsp. aureus SA957]	NC_022442.1	1533880	1534857	BA000033.2	1e-07	1529413	1529443	31
TATCTCGAAAACAAAACGCTGCAAAAAAATC	17.889	84	98	1571664	4e-09	758	788	31	lukF-PV	Panton-Valentine leukocidin chain F precursor[Staphylococcus aureus subsp. aureus SA957]	NC_022442.1	1533880	1534857	BA000033.2	1e-07	1529601	1529571	31
TATCTTCTGTTCTTTTGACTACCTCAGCGCC	17.889	84	98	1573250	4e-09	142	112	31	lukS-PV	Panton-Valentine leukocidin chain S precursor[Staphylococcus aureus subsp. aureus SA957]	NC_022442.1	1534859	1535797	AY954956.1	1e-07	24230	24200	31
TATCTTTATCATAACTTTTATCTTTAATAAA	17.889	84	98	1572232	4e-09	220	190	31	lukF-PV	Panton-Valentine leukocidin chain F precursor[Staphylococcus aureus subsp. aureus SA957]	NC_022442.1	1533880	1534857	BA000033.2	1e-07	1530139	1530169	31
TATGAATAATGGTTGGGGACCATATGGCAGA	17.889	84	98	1571837	4e-09	585	615	31	lukF-PV	Panton-Valentine leukocidin chain F precursor[Staphylococcus aureus subsp. aureus SA957]	NC_022442.1	1533880	1534857	BA000033.2	1e-07	1529774	1529744	31
TATGATTTTCCCAATCAACTTCATAAATTGA	17.889	84	98	1571524	4e-09	928	898	31	lukF-PV	Panton-Valentine leukocidin chain F precursor[Staphylococcus aureus subsp. aureus SA957]	NC_022442.1	1533880	1534857	BA000033.2	1e-07	1529431	1529461	31
TATGGATGTTACTCATGCTACTAGAAGAACA	17.889	84	98	1572579	4e-09	783	813	31	lukS-PV	Panton-Valentine leukocidin chain S precursor[Staphylococcus aureus subsp. aureus SA957]	NC_022442.1	1534859	1535797	BA000033.2	1e-07	1530516	1530486	31
TATGGCAATAGTTATTTAGAAGGATCTAGAA	17.889	84	98	1572542	4e-09	820	850	31	lukS-PV	Panton-Valentine leukocidin chain S precursor[Staphylococcus aureus subsp. aureus SA957]	NC_022442.1	1534859	1535797	BA000033.2	1e-07	1530479	1530449	31
TATGGCAGAAATATGGATGTTACTCATGCTA	17.889	84	98	1572590	4e-09	772	802	31	lukS-PV	Panton-Valentine leukocidin chain S precursor[Staphylococcus aureus subsp. aureus SA957]	NC_022442.1	1534859	1535797	BA000033.2	1e-07	1530527	1530497	31
TATGGTAATGAAATGTTTTTAGGCTCAAGAC	17.889	84	98	1571788	4e-09	634	664	31	lukF-PV	Panton-Valentine leukocidin chain F precursor[Staphylococcus aureus subsp. aureus SA957]	NC_022442.1	1533880	1534857	BA000033.2	1e-07	1529725	1529695	31
TATGTTAAAATTTACAAACACTTTCTTTCTA	17.889	84	98	1571416	0.061	69	52	18	SAZ172_0994	GNAT family acetyltransferase YjcF[Staphylococcus aureus subsp. aureus Z172]	NC_022604.1	1077258	1077692	BA000033.2	1e-07	1529353	1529323	31
TATTAAAATTACCACCTATGTTATAACCTAA	17.889	84	98	1572953	4e-09	439	409	31	lukS-PV	Panton-Valentine leukocidin chain S precursor[Staphylococcus aureus subsp. aureus SA957]	NC_022442.1	1534859	1535797	AY954956.1	1e-07	24527	24497	31
TATTAAAGATAAAAGTTATGATAAAGATACA	17.889	84	98	1572230	4e-09	192	222	31	lukF-PV	Panton-Valentine leukocidin chain F precursor[Staphylococcus aureus subsp. aureus SA957]	NC_022442.1	1533880	1534857	BA000033.2	1e-07	1530167	1530137	31
TATTAATATCTCCACCATAAGAATAACCTAC	17.889	84	98	1572010	4e-09	442	412	31	lukF-PV	Panton-Valentine leukocidin chain F precursor[Staphylococcus aureus subsp. aureus SA957]	NC_022442.1	1533880	1534857	BA000033.2	1e-07	1529917	1529947	31
TATTAATTTAACTGTATGATTTTCCCAATCA	17.889	84	98	1571510	4e-09	942	912	31	lukF-PV	Panton-Valentine leukocidin chain F precursor[Staphylococcus aureus subsp. aureus SA957]	NC_022442.1	1533880	1534857	BA000033.2	1e-07	1529417	1529447	31
TATTACAATTACAAAAACACAGATCATATAA	17.889	84	98	1573100	4e-09	262	292	31	lukS-PV	Panton-Valentine leukocidin chain S precursor[Staphylococcus aureus subsp. aureus SA957]	NC_022442.1	1534859	1535797	AY954956.1	1e-07	24350	24380	31
TATTACCTATCCAGTGAAGTTGATTCCAAAA	17.889	84	98	1571587	4e-09	865	835	31	lukF-PV	Panton-Valentine leukocidin chain F precursor[Staphylococcus aureus subsp. aureus SA957]	NC_022442.1	1533880	1534857	BA000033.2	1e-07	1529494	1529524	31
TATTCAAAAACAATTAGTTATAATCAACAAA	17.889	84	98	1572887	4e-09	475	505	31	lukS-PV	Panton-Valentine leukocidin chain S precursor[Staphylococcus aureus subsp. aureus SA957]	NC_022442.1	1534859	1535797	BA000033.2	1e-07	1530824	1530794	31
TATTCCCCATTGAACACTTTTTGAATTTTGA	17.889	84	98	1572834	4e-09	558	528	31	lukS-PV	Panton-Valentine leukocidin chain S precursor[Staphylococcus aureus subsp. aureus SA957]	NC_022442.1	1534859	1535797	BA000033.2	1e-07	1530741	1530771	31
TATTCTAGATCCTTCTAAATAACTATTGCCA	17.889	84	98	1572540	4e-09	852	822	31	lukS-PV	Panton-Valentine leukocidin chain S precursor[Staphylococcus aureus subsp. aureus SA957]	NC_022442.1	1534859	1535797	BA000033.2	1e-07	1530447	1530477	31
TATTCTCAATATTGTTATCAGCTTTAGATTC	17.889	84	98	1573289	4e-09	103	73	31	lukS-PV	Panton-Valentine leukocidin chain S precursor[Staphylococcus aureus subsp. aureus SA957]	NC_022442.1	1534859	1535797	AY954956.1	1e-07	24191	24161	31
TATTCTTATGGTGGAGATATTAATATCTCTA	17.889	84	98	1572004	4e-09	418	448	31	lukF-PV	Panton-Valentine leukocidin chain F precursor[Staphylococcus aureus subsp. aureus SA957]	NC_022442.1	1533880	1534857	BA000033.2	1e-07	1529941	1529911	31
TATTGCAACTGTTTCTCATGAAAAAGGCTCA	17.889	84	98	1572648	4e-09	714	744	31	lukS-PV	Panton-Valentine leukocidin chain S precursor[Staphylococcus aureus subsp. aureus SA957]	NC_022442.1	1534859	1535797	BA000033.2	1e-07	1530585	1530555	31
TATTGCCATAGTGTGTTGTTCTTCTAGTAGC	17.889	84	98	1572563	4e-09	829	799	31	lukS-PV	Panton-Valentine leukocidin chain S precursor[Staphylococcus aureus subsp. aureus SA957]	NC_022442.1	1534859	1535797	BA000033.2	1e-07	1530470	1530500	31
TATTGGTGATGGCGCTGAGGTAGTCAAAAGA	17.889	84	98	1573260	4e-09	102	132	31	lukS-PV	Panton-Valentine leukocidin chain S precursor[Staphylococcus aureus subsp. aureus SA957]	NC_022442.1	1534859	1535797	AY954956.1	1e-07	24190	24220	31
TATTGTTATCAGCTTTAGATTCATGAAACGA	17.889	84	98	1573298	4e-09	94	64	31	lukS-PV	Panton-Valentine leukocidin chain S precursor[Staphylococcus aureus subsp. aureus SA957]	NC_022442.1	1534859	1535797	AY954956.1	1e-07	24182	24152	31
TATTTGTTGGATATAAACCATATAGTCAAAA	17.889	84	98	1572748	4e-09	614	644	31	lukS-PV	Panton-Valentine leukocidin chain S precursor[Staphylococcus aureus subsp. aureus SA957]	NC_022442.1	1534859	1535797	BA000033.2	1e-07	1530685	1530655	31
TATTTTCATCTTTATAATTATTACCTATCCA	17.889	84	98	1571569	4e-09	883	853	31	lukF-PV	Panton-Valentine leukocidin chain F precursor[Staphylococcus aureus subsp. aureus SA957]	NC_022442.1	1533880	1534857	BA000033.2	1e-07	1529476	1529506	31
TATTTTTTTCATATCAATTATGTCCTTTCAC	17.889	84	98	1572440	0.061	939	922	18	NA	NA	NA	NA	NA	BA000033.2	1e-07	1530347	1530377	31
TCAAAAAAATTGGTTGGGATGTTGAAGCACA	17.889	84	98	1571874	4e-09	548	578	31	lukF-PV	Panton-Valentine leukocidin chain F precursor[Staphylococcus aureus subsp. aureus SA957]	NC_022442.1	1533880	1534857	BA000033.2	1e-07	1529811	1529781	31
TCAAAAAATCTTAAATATGTTAAAATTTACA	17.889	84	98	1571431	0.79	322	349	29	STP1_1377	YycI protein[Staphylococcus pasteuri SP1]	NC_022737.1	1462018	1462809	BA000033.2	1e-07	1529368	1529338	31
TCAAAGACTACTTATTACAATTACAAAAACA	17.889	84	98	1573112	4e-09	250	280	31	lukS-PV	Panton-Valentine leukocidin chain S precursor[Staphylococcus aureus subsp. aureus SA957]	NC_022442.1	1534859	1535797	AY954956.1	1e-07	24338	24368	31
TCAACTGTATTGGATAGCAAAAGCAATGCAA	17.889	84	98	1572384	4e-09	68	38	31	lukF-PV	Panton-Valentine leukocidin chain F precursor[Staphylococcus aureus subsp. aureus SA957]	NC_022442.1	1533880	1534857	BA000033.2	1e-07	1530291	1530321	31
TCAACTTCACTGGATAGGTAATAATTATAAA	17.889	84	98	1571579	4e-09	843	873	31	lukF-PV	Panton-Valentine leukocidin chain F precursor[Staphylococcus aureus subsp. aureus SA957]	NC_022442.1	1533880	1534857	BA000033.2	1e-07	1529516	1529486	31
TCAAGACAAAGCAACTTAAATGCTGGACAAA	17.889	84	98	1571764	4e-09	658	688	31	lukF-PV	Panton-Valentine leukocidin chain F precursor[Staphylococcus aureus subsp. aureus SA957]	NC_022442.1	1533880	1534857	BA000033.2	1e-07	1529701	1529671	31
TCAATATTGTTATCAGCTTTAGATTCATGAA	17.889	84	98	1573294	4e-09	98	68	31	lukS-PV	Panton-Valentine leukocidin chain S precursor[Staphylococcus aureus subsp. aureus SA957]	NC_022442.1	1534859	1535797	AY954956.1	1e-07	24186	24156	31
TCAATCCTTCATTTATTGCAACTGTTTCTCA	17.889	84	98	1572661	4e-09	701	731	31	lukS-PV	Panton-Valentine leukocidin chain S precursor[Staphylococcus aureus subsp. aureus SA957]	NC_022442.1	1534859	1535797	BA000033.2	1e-07	1530598	1530568	31
TCAATCTAAGGAAAAAAATCCTATGAGCTAA	17.889	84	98	1571474	4e-09	948	978	31	lukF-PV	Panton-Valentine leukocidin chain F precursor[Staphylococcus aureus subsp. aureus SA957]	NC_022442.1	1533880	1534857	BA000033.2	1e-07	1529411	1529381	31
TCAATGGGGAATAAAAGCTAATTCATTTATC	17.889	84	98	1572816	4e-09	546	576	31	lukS-PV	Panton-Valentine leukocidin chain S precursor[Staphylococcus aureus subsp. aureus SA957]	NC_022442.1	1534859	1535797	BA000033.2	1e-07	1530753	1530723	31
TCAATTAAGACGTGGTTACCCTAATATAGAA	17.889	84	98	1571390	0.22	172	188	17	MS7_0645	pyridine nucleotide-disulfide oxidoreductase family protein[Staphylococcus aureus subsp. aureus 11819-97]	NC_017351.1	686824	687024	BA000033.2	1e-07	1529297	1529327	31
TCAATTAATTCAGATTCTAATGACTCAGTAA	17.889	84	98	1572097	4e-09	325	355	31	lukF-PV	Panton-Valentine leukocidin chain F precursor[Staphylococcus aureus subsp. aureus SA957]	NC_022442.1	1533880	1534857	BA000033.2	1e-07	1530034	1530004	31
TCAATTATGTCCTTTCACTTTAATTTCATGA	17.889	84	98	1572453	4e-09	939	909	31	NA	NA	NA	NA	NA	BA000033.2	1e-07	1530360	1530390	31
TCAATTCAAAGACTACTTATTACAATTACAA	17.889	84	98	1573117	4e-09	245	275	31	lukS-PV	Panton-Valentine leukocidin chain S precursor[Staphylococcus aureus subsp. aureus SA957]	NC_022442.1	1534859	1535797	AY954956.1	1e-07	24333	24363	31
TCACAAAATGCCAGTGTTATCCAGAGGTAAC	17.889	84	98	1571720	4e-09	702	732	31	lukF-PV	Panton-Valentine leukocidin chain F precursor[Staphylococcus aureus subsp. aureus SA957]	NC_022442.1	1533880	1534857	BA000033.2	1e-07	1529657	1529627	31
TCACACAAAATATTCAGTTTGATTTTGTTAA	17.889	84	98	1573198	4e-09	164	194	31	lukS-PV	Panton-Valentine leukocidin chain S precursor[Staphylococcus aureus subsp. aureus SA957]	NC_022442.1	1534859	1535797	AY954956.1	1e-07	24252	24282	31
TCACACCTGTAAGTGAGAAAAAGGTTGATGA	17.889	84	98	1572339	4e-09	83	113	31	lukF-PV	Panton-Valentine leukocidin chain F precursor[Staphylococcus aureus subsp. aureus SA957]	NC_022442.1	1533880	1534857	BA000033.2	1e-07	1530276	1530246	31
TCACATCATTAGGTAAAATGTCTGGACATGA	17.889	84	98	1572787	4e-09	575	605	31	lukS-PV	Panton-Valentine leukocidin chain S precursor[Staphylococcus aureus subsp. aureus SA957]	NC_022442.1	1534859	1535797	BA000033.2	1e-07	1530724	1530694	31
TCACTCCTATTGCTACTTCGTTTCATGAATC	17.889	84	98	1573315	4e-09	47	77	31	lukS-PV	Panton-Valentine leukocidin chain S precursor[Staphylococcus aureus subsp. aureus SA957]	NC_022442.1	1534859	1535797	AY954956.1	1e-07	24135	24165	31
TCACTGATATAGTTTTGTTGATTATAACTAA	17.889	84	98	1572874	4e-09	518	488	31	lukS-PV	Panton-Valentine leukocidin chain S precursor[Staphylococcus aureus subsp. aureus SA957]	NC_022442.1	1534859	1535797	BA000033.2	1e-07	1530781	1530811	31
TCACTGGATAGGTAATAATTATAAAGATGAA	17.889	84	98	1571573	4e-09	849	879	31	lukF-PV	Panton-Valentine leukocidin chain F precursor[Staphylococcus aureus subsp. aureus SA957]	NC_022442.1	1533880	1534857	BA000033.2	1e-07	1529510	1529480	31
TCACTTTAATTTCATGAGTTTTCCAGTTCAC	17.889	84	98	1572467	4e-09	925	895	31	lukS-PV	Panton-Valentine leukocidin chain S precursor[Staphylococcus aureus subsp. aureus SA957]	NC_022442.1	1534859	1535797	BA000033.2	1e-07	1530374	1530404	31
TCAGATTCCGATAAGTTAAAAATTTCTCAGA	17.889	84	98	1572277	4e-09	145	175	31	lukF-PV	Panton-Valentine leukocidin chain F precursor[Staphylococcus aureus subsp. aureus SA957]	NC_022442.1	1533880	1534857	BA000033.2	1e-07	1530214	1530184	31
TCAGCTTTAGATTCATGAAACGAAGTAGCAA	17.889	84	98	1573306	4e-09	86	56	31	lukS-PV	Panton-Valentine leukocidin chain S precursor[Staphylococcus aureus subsp. aureus SA957]	NC_022442.1	1534859	1535797	AY954956.1	1e-07	24174	24144	31
TCAGTAAACGTTGTAGATTATGCACCTAAAA	17.889	84	98	1572073	4e-09	349	379	31	lukF-PV	Panton-Valentine leukocidin chain F precursor[Staphylococcus aureus subsp. aureus SA957]	NC_022442.1	1533880	1534857	BA000033.2	1e-07	1530010	1529980	31
TCAGTTGTTACATCAATTGCATTGCTTTTGC	17.889	84	98	1572400	4e-09	22	52	31	lukF-PV	Panton-Valentine leukocidin chain F precursor[Staphylococcus aureus subsp. aureus SA957]	NC_022442.1	1533880	1534857	BA000033.2	1e-07	1530337	1530307	31
TCATAGGATTTTTTTCCTTAGATTGAGTATC	17.889	84	98	1571479	4e-09	973	943	31	lukF-PV	Panton-Valentine leukocidin chain F precursor[Staphylococcus aureus subsp. aureus SA957]	NC_022442.1	1533880	1534857	BA000033.2	1e-07	1529386	1529416	31
TCATATAAAAGCAATGAGGTGGCCTTTCCAA	17.889	84	98	1573077	4e-09	285	315	31	lukS-PV	Panton-Valentine leukocidin chain S precursor[Staphylococcus aureus subsp. aureus SA957]	NC_022442.1	1534859	1535797	AY954956.1	1e-07	24373	24403	31
TCATATTTAACTGTGTAATTTCTGTTTACAA	17.889	84	98	1572499	4e-09	893	863	31	lukS-PV	Panton-Valentine leukocidin chain S precursor[Staphylococcus aureus subsp. aureus SA957]	NC_022442.1	1534859	1535797	BA000033.2	1e-07	1530406	1530436	31
TCATCTTTATAATTATTACCTATCCAGTGAA	17.889	84	98	1571574	4e-09	878	848	31	lukF-PV	Panton-Valentine leukocidin chain F precursor[Staphylococcus aureus subsp. aureus SA957]	NC_022442.1	1533880	1534857	BA000033.2	1e-07	1529481	1529511	31
TCATGAAAAAGGCTCAGGAGATACAAGTGAA	17.889	84	98	1572633	4e-09	729	759	31	lukS-PV	Panton-Valentine leukocidin chain S precursor[Staphylococcus aureus subsp. aureus SA957]	NC_022442.1	1534859	1535797	BA000033.2	1e-07	1530570	1530540	31
TCATGAGTTTTCCAGTTCACTTCATATTTAA	17.889	84	98	1572478	4e-09	914	884	31	lukS-PV	Panton-Valentine leukocidin chain S precursor[Staphylococcus aureus subsp. aureus SA957]	NC_022442.1	1534859	1535797	BA000033.2	1e-07	1530385	1530415	31
TCATGCTACTAGAAGAACAACACACTATGGC	17.889	84	98	1572567	4e-09	795	825	31	lukS-PV	Panton-Valentine leukocidin chain S precursor[Staphylococcus aureus subsp. aureus SA957]	NC_022442.1	1534859	1535797	BA000033.2	1e-07	1530504	1530474	31
TCATTACCATAAGTTGAATGATAACTATCTC	17.889	84	98	1571808	4e-09	644	614	31	lukF-PV	Panton-Valentine leukocidin chain F precursor[Staphylococcus aureus subsp. aureus SA957]	NC_022442.1	1533880	1534857	BA000033.2	1e-07	1529715	1529745	31
TCATTAGGTAAAATGTCTGGACATGATCCAA	17.889	84	98	1572782	4e-09	580	610	31	lukS-PV	Panton-Valentine leukocidin chain S precursor[Staphylococcus aureus subsp. aureus SA957]	NC_022442.1	1534859	1535797	BA000033.2	1e-07	1530719	1530689	31
TCATTTTGATTTTTAGGTGCATAATCTACAA	17.889	84	98	1572063	4e-09	389	359	31	lukF-PV	Panton-Valentine leukocidin chain F precursor[Staphylococcus aureus subsp. aureus SA957]	NC_022442.1	1533880	1534857	BA000033.2	1e-07	1529970	1530000	31
TCCAACAAATAAATTTGGATCATGTCCAGAC	17.889	84	98	1572768	4e-09	624	594	31	lukS-PV	Panton-Valentine leukocidin chain S precursor[Staphylococcus aureus subsp. aureus SA957]	NC_022442.1	1534859	1535797	BA000033.2	1e-07	1530675	1530705	31
TCCAAGAAGTTTTGTCCAGCATTTAAGTTGC	17.889	84	98	1571754	4e-09	698	668	31	lukF-PV	Panton-Valentine leukocidin chain F precursor[Staphylococcus aureus subsp. aureus SA957]	NC_022442.1	1533880	1534857	BA000033.2	1e-07	1529661	1529691	31
TCCAATACAGTTGATGCAGCTCAACATATCA	17.889	84	98	1572367	4e-09	55	85	31	lukF-PV	Panton-Valentine leukocidin chain F precursor[Staphylococcus aureus subsp. aureus SA957]	NC_022442.1	1533880	1534857	BA000033.2	1e-07	1530304	1530274	31
TCCAGAATTTATTGGTGTCCTATCTCGAAAA	17.889	84	98	1571684	4e-09	738	768	31	lukF-PV	Panton-Valentine leukocidin chain F precursor[Staphylococcus aureus subsp. aureus SA957]	NC_022442.1	1533880	1534857	BA000033.2	1e-07	1529621	1529591	31
TCCGATAAGTTAAAAATTTCTCAGATTTTAA	17.889	84	98	1572271	4e-09	151	181	31	lukF-PV	Panton-Valentine leukocidin chain F precursor[Staphylococcus aureus subsp. aureus SA957]	NC_022442.1	1533880	1534857	BA000033.2	1e-07	1530208	1530178	31
TCCTATCTCGAAAACAAAACGCTGCAAAAAA	17.889	84	98	1571667	4e-09	755	785	31	lukF-PV	Panton-Valentine leukocidin chain F precursor[Staphylococcus aureus subsp. aureus SA957]	NC_022442.1	1533880	1534857	BA000033.2	1e-07	1529604	1529574	31
TCCTATGAGCTAAACAGATAGATAATCAAAA	17.889	84	98	1571456	0.001	967	987	21	SAAG_02096	panton-Valentine leukocidin chain F protein[Staphylococcus aureus subsp. aureus 55/2053]	NC_022113.1	1460399	1461385	BA000033.2	1e-07	1529393	1529363	31
TCCTATTGCTACTTCGTTTCATGAATCTAAA	17.889	84	98	1573311	4e-09	51	81	31	lukS-PV	Panton-Valentine leukocidin chain S precursor[Staphylococcus aureus subsp. aureus SA957]	NC_022442.1	1534859	1535797	AY954956.1	1e-07	24139	24169	31
[truncated: 7,423 more rows]
