# Supplementary material for: Panton–Valentine leucocidin is the key determinant of Staphylococcus aureus pyomyositis in a bacterial GWAS
Source: eLife journal article supplement (doi:10.7554/elife.42486), 2019-02-22
Supplement: supp [file elife-42486-supp-v1.zip › elife_poa_e42486_Supplementary_file_3.xlsx]

## Sheet: phage_blast_results
Isolate name	Isolate from carriage or pyomyositis	phiCC121 coverage	phiSLT coverage	phiSa2USA coverage	phiSA2MW coverage	phiPVL108 coverage	phiPVL coverage	phi2958 coverage	Best_covg (min 95%)	PVL CDS coverage using USA300_FPR3757 (CP000255.1: 1546170-1548350)	PVL presence inferred from blast	Presence of kmer pattern mapping across PVL CDS	phiCC121 numhits	phiSLT numhits	phiSa2USA numhits	phiSA2MW numhits	phiPVL108 numhits	phiPVL numhits	phi2958 numhits
2012_1	Carriage	30.8	45.42	35.36	32.37	71.88	68.18	35.09	NA	99.8	1	1	14	5	12	14	19	14	15
2012_100	Carriage	8.06	3.85	9.54	7.04	63.88	76.85	12.04	NA	76.9	0	0	13	4	11	12	23	12	17
2012_1001	Carriage	99.57	97.36	90.7	91.7	79.26	74.6	87.93	phiSLT	98.3	1	1	13	4	21	19	38	21	16
2012_1002	Carriage	68.23	93.82	66.22	65.66	45.02	49.66	65.71	NA	74.4	0	0	22	3	21	22	37	32	24
2012_1004	Carriage	7.84	4.16	7.62	8.47	32.09	46.52	8.27	NA	76.8	0	0	14	4	11	10	23	12	13
2012_1006	Carriage	11.56	3.57	10.14	7.68	68.91	64.02	10.08	NA	71	0	0	14	2	12	12	26	12	13
2012_1009	Carriage	8	5.86	10.05	10.05	34.66	48.49	11.13	NA	74.9	0	0	18	4	17	14	25	19	16
2012_1012	Carriage	13.32	6.2	11.31	9.83	42.58	29.81	12.03	NA	71	0	0	13	5	12	10	31	16	17
2012_1014	Carriage	7.9	5.93	11.34	8.95	40.44	42.85	12.17	NA	74.4	0	0	18	4	18	20	31	22	21
2012_1020	Carriage	86.7	95.31	91.3	87.44	41.9	56.1	84.43	phiSLT	76.8	0	0	20	4	17	19	30	19	17
2012_1021	Carriage	99.63	97.43	90.69	91.73	78.1	75.81	88.52	phiSLT	99.8	1	1	14	3	23	19	43	20	16
2012_1023	Carriage	7.59	3.76	7.38	8.22	32.16	46.52	8.05	NA	76.8	0	0	13	3	10	9	24	12	12
2012_1025	Carriage	7.54	3.67	7.17	8.01	31.85	46.29	7.88	NA	74.9	0	0	12	2	9	8	24	12	11
2012_1029	Carriage	11.25	6.37	12.22	10.83	68.11	65.15	13.42	NA	75	0	0	19	5	22	19	32	22	22
2012_1030	Carriage	10.63	5.89	12.23	9.98	71.02	82.12	12.97	NA	77	0	0	26	6	20	22	34	20	23
2012_1038	Carriage	10.75	10.7	11.82	14.06	46.73	51.7	13.96	NA	71	0	0	14	4	16	12	28	15	18
2012_1040	Carriage	10.6	7.24	9.96	9.28	74.34	83.65	13.55	NA	74.9	0	0	19	6	17	14	26	14	16
2012_1041	Carriage	65.77	93.82	66.32	65.62	44.16	48.55	65.36	NA	74.4	0	0	17	2	15	16	31	20	19
2012_1042	Carriage	88.05	95.53	94.36	88.17	77.47	70.82	84.51	phiSLT	71	0	0	26	3	21	22	37	22	26
2012_1044	Carriage	99.71	97.56	90.66	92.93	81.62	75.6	89.98	phiSLT	99.8	1	1	14	3	22	20	37	24	18
2012_1047	Carriage	7.78	4.06	7.41	8.25	31.95	46.29	8.1	NA	74.9	0	0	13	3	10	9	25	11	12
2012_1048	Carriage	13.64	6.3	12.33	9.97	72.05	65.98	12.24	NA	71	0	0	19	5	14	18	33	19	17
2012_1056	Carriage	7.54	3.67	7.17	8.01	31.48	46.29	7.88	NA	74.9	0	0	12	2	9	8	23	11	11
2012_1057	Carriage	6	3.98	9.15	7.61	33.69	44.3	10.21	NA	76.4	0	0	13	4	12	11	22	15	15
2012_119	Carriage	3.26	3.04	3.58	3.62	8.78	4	6.19	NA	71	0	0	3	2	2	2	8	2	4
2012_121	Carriage	64.43	93.82	65.75	64.72	43.96	48.55	66.35	NA	74.4	0	0	23	5	22	21	34	25	28
2012_127	Carriage	6.48	3.76	8.48	8.37	67.6	66.68	8.3	NA	74.9	0	0	12	3	9	11	24	11	11
2012_131	Carriage	87.78	95.49	94.35	88.08	77.26	71.74	83.82	phiSLT	71	0	0	17	2	11	13	25	15	17
2012_150	Carriage	66.19	93.81	66.4	65.71	44.13	48.54	66.48	NA	74.4	0	0	25	4	25	21	37	29	27
2012_153	Carriage	7.54	3.67	7.17	8.01	31.81	46.29	7.88	NA	74.9	0	0	12	2	9	8	25	11	11
2012_157	Carriage	5.53	4.3	5.57	5.22	60.48	80.61	7.65	NA	76.9	0	0	12	5	10	8	19	8	10
2012_162	Carriage	13.42	6.3	11.52	10.04	42.84	30.07	12.2	NA	76.9	0	0	15	6	13	11	33	18	18
2012_173	Carriage	97.42	97.55	91.51	91.04	78.68	75.28	88.61	phiSLT	99.9	1	1	14	1	18	16	37	21	16
2012_178	Carriage	35.33	45.42	39.76	34.11	77.33	70.63	36.19	NA	99.8	1	1	12	2	11	13	22	16	12
2012_183	Carriage	13.34	12.29	14.95	14.51	38.8	52.65	15.97	NA	76.8	0	0	23	7	19	17	33	26	20
2012_186	Carriage	88.41	97.74	99.12	90.05	51.33	59.88	88.43	phiSa2USA	100	1	1	27	8	19	24	36	25	28
2012_19	Carriage	13.32	6.2	11.31	9.83	42.48	29.81	12.02	NA	71	0	0	13	5	12	10	31	16	17
2012_195	Carriage	90.85	95.33	84.7	86.84	38.79	56.01	84.84	phiSLT	74.9	0	0	7	2	12	11	22	14	10
2012_201	Carriage	64.87	94.01	67.28	65.4	43.39	48.37	65.57	NA	74.4	0	0	20	3	20	20	34	20	23
2012_203	Carriage	13.04	11.81	14.52	14.6	38.57	52.17	15.69	NA	74.9	0	0	25	6	23	21	30	24	24
2012_204	Carriage	7.91	5.94	10.79	8.8	40.37	45.18	11.4	NA	74.4	0	0	19	4	19	18	29	20	21
2012_210	Carriage	17.19	11.8	15.53	16.37	66.95	81.4	16.29	NA	76.8	0	0	25	7	23	21	33	27	28
2012_219	Carriage	87.57	95.55	94.29	88.14	77.29	70.62	84.27	phiSLT	71	0	0	17	2	12	13	26	14	17
2012_222	Carriage	7.79	4.07	7.54	8.39	31.73	46.44	8.24	NA	76.8	0	0	14	4	11	10	25	12	13
2012_231	Carriage	99.45	97.56	90.72	91.8	77.98	75.77	89.03	phiSLT	99.8	1	1	20	5	23	21	40	25	18
2012_232	Carriage	7.9	5.94	10.68	8.78	40.47	45.19	11.39	NA	74.4	0	0	14	4	14	14	26	17	17
2012_24	Carriage	86.52	95.67	91.5	87.29	42.01	56.13	84.47	phiSLT	76.8	0	0	20	4	17	19	33	20	17
2012_240	Carriage	11.47	11.25	13.48	12.54	37.85	49.58	15.38	NA	74.4	0	0	15	4	12	10	24	20	17
2012_241	Carriage	8.02	3.84	9.56	8.94	34.88	52.45	11.53	NA	76.7	0	0	15	4	12	10	20	9	14
2012_242	Carriage	88.33	95.64	94.37	89.14	51.95	42.19	85.6	phiSLT	76.9	0	0	26	3	18	20	56	40	27
2012_246	Carriage	90.89	95.33	84.86	87.34	39.15	56.05	84.88	phiSLT	74.9	0	0	16	3	18	17	28	19	16
2012_249	Carriage	7.84	4.16	7.62	8.47	32.09	46.52	8.27	NA	76.8	0	0	14	4	11	10	23	12	13
2012_25	Carriage	10.61	5.62	12.06	9.83	70.28	81.93	12.36	NA	77	0	0	16	4	12	14	26	15	16
2012_250	Carriage	99.59	97.39	88.91	91.7	80.7	75.79	88.38	phiSLT	99.8	1	1	19	7	25	22	48	28	21
2012_26	Carriage	11.29	6.46	12.34	10.96	68.34	65.27	13.49	NA	76.3	0	0	20	6	23	20	33	23	23
2012_266	Carriage	9.24	6.97	10.07	9.93	34.98	48.12	13.44	NA	74.7	0	0	16	5	18	17	27	22	22
2012_282	Carriage	9.17	5.94	11.69	10.76	40.83	45.38	11.8	NA	74.4	0	0	23	5	21	20	39	24	26
2012_298	Carriage	11.63	3.69	10.28	7.83	69.15	64.17	10.18	NA	77.1	0	0	15	3	13	13	27	13	14
2012_299	Carriage	91.04	95.43	85.04	87.48	39.32	56.25	85.02	phiSLT	76.8	0	0	16	3	17	16	30	19	15
2012_301	Carriage	87.68	95.67	94.45	88.31	77.7	71	84.41	phiSLT	77.1	0	0	28	4	23	22	38	24	28
2012_31	Carriage	87.51	97.59	89.38	87.48	55.65	46.38	89.16	phiSLT	99.8	1	1	23	5	19	18	37	24	21
2012_310	Carriage	87.68	95.67	94.47	88.28	77.54	70.83	83.93	phiSLT	77.1	0	0	18	3	12	14	28	15	18
2012_319	Carriage	87.15	93.51	88.22	87.14	43.09	56.03	86.13	NA	76.8	0	0	25	6	23	22	35	26	21
2012_320	Carriage	6.5	2.66	6.83	7.9	40.74	29.81	9.46	NA	71	0	0	12	2	9	9	22	13	13
2012_324	Carriage	11.89	10.84	13.97	13.45	36.71	48.99	15.11	NA	74.9	0	0	20	6	21	19	26	20	21
2012_327	Carriage	64.38	93.82	65.46	64.69	39.71	48.47	66.43	NA	74.4	0	0	20	2	19	17	32	20	24
2012_330	Carriage	64.46	93.82	65.74	64.4	44.99	49.57	66.65	NA	74.4	0	0	22	4	21	21	35	34	32
2012_336	Carriage	87.77	95.49	94.34	88.07	77.28	71.74	83.81	phiSLT	71	0	0	17	2	11	13	26	15	17
2012_339	Carriage	9.24	4.09	9.71	7.31	68.96	65.38	11.01	NA	74.8	0	0	16	3	13	13	23	14	15
2012_345	Carriage	87.59	95.51	94.4	86.68	77.28	70.69	83.85	phiSLT	71	0	0	17	2	8	14	28	14	17
2012_356.1	Carriage	13.32	6.2	11.31	9.83	42.51	29.81	12.03	NA	71	0	0	13	5	12	10	33	16	17
2012_358	Carriage	93.74	95.52	88.61	89.96	78.98	72.16	86.57	phiSLT	71	0	0	23	3	23	22	40	26	24
2012_360	Carriage	6.92	3.75	10.28	8.37	62.76	80.55	11.6	NA	74.9	0	0	14	3	11	10	21	12	12
2012_368	Carriage	94.26	97.52	89.4	93.62	73.93	95.24	89.22	phiSLT	99.9	1	1	14	4	12	8	23	12	8
2012_384	Carriage	7.35	4.21	7.21	5.27	58.72	77.33	9.25	NA	71	0	0	11	4	11	9	20	8	10
2012_385	Carriage	99.38	97.44	90.74	91.74	79.43	74.69	87.97	phiSLT	99.8	1	1	15	6	24	21	37	21	18
2012_391	Carriage	87.6	95.55	94.32	88.01	76.49	70.63	83.95	phiSLT	71	0	0	17	2	11	12	26	16	18
2012_396	Carriage	88.98	95.51	94.38	87.37	77.25	71.55	83.85	phiSLT	71	0	0	27	6	18	25	39	25	26
2012_401	Carriage	13.38	6.3	11.52	10.04	42.71	30.04	12.2	NA	76.9	0	0	14	6	13	11	33	17	18
2012_407	Carriage	95.94	97.56	90.77	89.24	79.75	78.09	89.72	phiSLT	99.8	1	1	24	6	26	22	44	26	22
2012_409	Carriage	13.6	6.3	12.02	9.43	71.74	65.35	11.57	NA	71	0	0	22	5	20	19	42	21	20
2012_415	Carriage	8.06	3.85	9.54	7.04	63.93	76.85	12.09	NA	76.9	0	0	14	4	12	14	27	11	19
2012_417	Carriage	4.63	3.65	8.14	6.89	32.64	45.41	10.45	NA	75	0	0	13	2	9	13	24	13	16
2012_422	Carriage	11.3	6.46	12.33	10.95	68.32	65.27	13.49	NA	76.6	0	0	20	6	23	20	33	23	23
2012_427	Carriage	30.81	45.43	35.36	32.37	71.89	68.19	35.1	NA	99.8	1	1	14	5	12	14	19	14	15
2012_428	Carriage	8.6	3.76	10.58	9.36	62.79	80.03	11.52	NA	74.8	0	0	15	3	11	10	19	10	13
2012_429	Carriage	9.31	3.76	10.58	7.2	69.74	68.25	11.07	NA	76.8	0	0	15	3	13	13	22	15	14
2012_430	Carriage	88.72	98.75	99.74	90.77	51.5	60.42	88.94	phiSa2USA	100	1	1	29	9	17	21	37	24	24
2012_434	Carriage	62.57	60.74	62.65	60.72	36.47	32.77	62.31	NA	74.3	0	0	26	9	24	26	32	24	29
2012_440	Carriage	7.78	4.06	7.41	8.25	31.89	46.29	8.1	NA	74.9	0	0	13	3	10	9	23	11	12
2012_441	Carriage	99.48	97.55	90.74	91.88	78.83	76.21	89.08	phiSLT	99.8	1	1	16	5	21	18	41	26	15
2012_449	Carriage	7.9	5.94	10.67	8.68	40.41	45.25	11.04	NA	74.4	0	0	14	4	11	11	23	16	15
2012_450	Carriage	12.52	7.12	13.18	12.62	75.21	83.26	13.22	NA	77	0	0	18	6	14	13	22	14	16
2012_456	Carriage	12.31	7.02	13.06	12.53	75.1	83.11	13.14	NA	71.1	0	0	22	5	16	15	27	16	18
2012_460	Carriage	6.54	3.77	8.66	8.6	34.07	46.71	9.71	NA	74.8	0	0	13	3	12	10	20	10	12
2012_476	Carriage	90.92	95.43	84.91	87.09	39.05	56.28	85.03	phiSLT	76.8	0	0	9	4	14	13	25	16	12
2012_490	Carriage	64.44	93.82	65.77	64.44	43.81	48.6	66.46	NA	74.4	0	0	23	3	20	19	37	26	26
2012_515	Carriage	91.01	95.33	84.84	87.32	39.13	56.05	84.88	phiSLT	74.9	0	0	16	3	17	16	28	19	15
2012_544	Carriage	9.28	6.13	11.81	10.51	40.82	45.3	11.85	NA	74.4	0	0	19	6	16	17	28	18	20
2012_553	Carriage	9.44	6.02	8.23	9.37	63.4	84.49	10.72	NA	76.8	0	0	19	5	15	14	26	21	16
2012_555	Carriage	86.34	95.82	96.04	86.82	78.75	72.89	86.37	phiSa2USA	74.8	0	0	21	3	15	19	31	21	20
2012_572	Carriage	12.2	5.2	11.77	9.87	67.7	63.58	13.17	NA	71	0	0	17	3	17	15	32	20	19
2012_576	Carriage	9.54	4.2	9.84	7.44	69.22	65.52	11.31	NA	76.9	0	0	16	4	14	14	25	15	15
2012_579	Carriage	6.19	3.75	7.52	8.62	33.52	47.34	9.51	NA	74.8	0	0	14	3	10	9	20	9	13
2012_584	Carriage	64.4	93.82	65.74	64.68	43.99	48.49	66.47	NA	74.4	0	0	23	4	23	22	36	25	30
2012_586	Carriage	7.91	5.94	10.69	8.9	39.39	41.64	12.86	NA	74.4	0	0	18	4	17	19	31	21	22
2012_597	Carriage	7.54	3.67	7.17	8.01	31.52	46.27	7.88	NA	74.9	0	0	12	2	9	8	24	11	11
2012_598	Carriage	84.85	94.69	91.51	86.58	50.88	55.46	85.81	NA	74.4	0	0	22	6	24	22	38	29	23
2012_60	Carriage	99.42	97.52	90.19	91.78	78.22	75.26	88.48	phiSLT	99.8	1	1	11	2	19	15	39	19	14
2012_613	Carriage	91.12	93.98	87.28	87.56	39.23	55.83	85.8	NA	74.9	0	0	9	4	11	13	24	13	12
2012_62	Carriage	86.54	95.31	91.27	86.99	41.59	56.01	84.39	phiSLT	76.8	0	0	13	4	12	13	25	16	13
2012_620	Carriage	4.73	3.67	7.16	8	30.73	46.29	7.12	NA	74.9	0	0	11	2	9	8	24	11	10
2012_622	Carriage	2.46	4.17	4.39	4.45	21.87	19.04	4.43	NA	75	0	0	4	4	5	5	10	3	5
2012_624	Carriage	11.24	6.46	12.31	10.91	68.26	65.21	13.38	NA	76.6	0	0	14	6	14	13	22	16	17
2012_628	Carriage	3.31	3.13	3.71	3.76	8.88	4.15	6.28	NA	76.9	0	0	4	3	3	3	10	3	5
2012_634	Carriage	9.56	6.87	10.58	11.25	34.64	49.09	11.79	NA	76.9	0	0	22	6	21	20	30	23	22
2012_636	Carriage	7.43	5.71	11.34	10.86	41.05	43.55	12.23	NA	76.8	0	0	16	4	13	14	27	17	15
2012_638	Carriage	92.58	95.36	88.54	89.23	39.75	56.08	86.98	phiSLT	76.8	0	0	18	4	17	19	34	20	18
2012_646	Carriage	87.65	95.62	94.53	86.82	77.5	70.84	83.94	phiSLT	77.1	0	0	18	3	9	14	28	15	18
2012_654	Carriage	7.54	3.67	7.17	8.01	31.89	46.29	7.88	NA	74.9	0	0	12	2	9	8	23	11	11
2012_660	Carriage	5.54	4.31	5.57	5.22	60.48	80.61	7.65	NA	76.9	0	0	12	5	10	8	18	8	10
2012_661	Carriage	13.57	6.5	13.73	10.53	73.18	69.95	13.93	NA	72.3	0	0	24	5	24	25	47	32	26
2012_67	Carriage	99.61	97.4	89.3	91.78	81.68	75.84	88.42	phiSLT	99.8	1	1	17	4	23	21	38	25	18
2012_670	Carriage	77.31	90.62	80.31	78.28	32.32	45.3	77.82	NA	74.8	0	0	15	3	8	11	24	13	16
2012_671	Carriage	7.59	3.76	7.38	8.22	32.14	46.52	8.05	NA	76.8	0	0	13	3	10	9	25	12	12
2012_679	Carriage	11.48	11.25	13.48	12.55	37.88	49.78	15.47	NA	74.4	0	0	16	4	14	11	26	22	19
2012_680	Carriage	82.42	95.58	83.23	81.51	19.73	19.54	83.15	phiSLT	71	0	0	13	2	8	10	20	10	12
2012_687	Carriage	87.82	95.51	94.39	86.68	77.26	70.69	83.84	phiSLT	71	0	0	17	2	8	14	27	14	17
2012_689	Carriage	99.47	97.56	90.77	91.8	78.63	75.6	89.08	phiSLT	99.8	1	1	14	4	23	19	44	24	17
2012_690	Carriage	7.91	5.94	10.67	8.76	40.43	45.19	11.31	NA	74.4	0	0	16	4	15	14	27	18	18
2012_692	Carriage	99.7	97.52	90.72	91.79	78.88	75.74	89.02	phiSLT	99.8	1	1	19	5	23	21	40	25	18
2012_697	Carriage	99.39	97.43	90.71	91.74	78.56	75.71	89.02	phiSLT	99.8	1	1	17	4	23	19	40	25	17
2012_699	Carriage	7.59	3.76	7.38	8.22	32.1	46.52	8.05	NA	76.8	0	0	13	3	10	9	24	12	12
2012_702	Carriage	8	3.75	9.32	6.82	63.55	76.61	11.86	NA	71	0	0	12	3	10	12	21	10	16
2012_711	Carriage	88.5	94.38	84.36	88.13	49.56	53.37	86.37	NA	76.7	0	0	13	3	15	14	36	25	12
2012_723	Carriage	7.59	3.76	7.38	8.22	32.09	46.52	8.05	NA	76.8	0	0	13	3	10	9	24	12	12
2012_727	Carriage	12.15	10.77	16.29	14.76	43.21	48.35	15.46	NA	74.4	0	0	21	6	18	19	33	20	24
2012_731	Carriage	11.48	5.94	11.25	10.28	41.01	43.68	12.99	NA	74.4	0	0	21	5	21	23	37	27	26
2012_739	Carriage	87.63	95.55	94.34	88.14	77.29	70.69	83.84	phiSLT	71	0	0	17	2	11	14	26	14	17
2012_740	Carriage	91.02	95.33	84.84	87.32	39.01	56.05	84.88	phiSLT	74.9	0	0	16	3	17	16	33	20	15
2012_741	Carriage	90.84	95.33	84.7	86.84	38.87	56.01	84.84	phiSLT	74.9	0	0	7	2	12	11	24	14	10
2012_75	Carriage	87.76	95.49	94.38	88.12	77.48	71.87	84.49	phiSLT	71	0	0	26	3	20	21	38	24	26
2012_751	Carriage	8.65	3.85	10.79	9.58	63.11	80.26	11.68	NA	76.7	0	0	16	4	12	11	20	11	14
2012_756	Carriage	93.04	95.69	89.55	88.87	75.93	71.97	86.49	phiSLT	77.1	0	0	16	3	18	15	33	19	20
2012_763.1	Carriage	7.54	3.67	7.17	8.01	31.9	46.28	7.88	NA	74.9	0	0	12	2	9	8	24	12	11
2012_770	Carriage	7.78	4.06	7.41	8.25	31.96	46.29	8.1	NA	74.9	0	0	13	3	10	9	21	11	12
2012_771	Carriage	88.5	98.75	99.74	90.61	75.24	88.25	86.91	phiSa2USA	100	1	1	13	2	3	10	23	12	10
2012_788	Carriage	99.67	97.56	91.94	91.9	79.3	75.93	89.11	phiSLT	99.8	1	1	16	5	22	23	37	25	19
2012_791	Carriage	94.2	97.77	97.93	92.75	80.98	74.37	90.35	phiSa2USA	99.8	1	1	58	32	52	53	39	26	55
2012_794	Carriage	88.27	95.61	94.48	88.23	78.65	70.84	83.91	phiSLT	77.1	0	0	23	6	18	20	32	19	23
2012_795	Carriage	89.04	95.62	94.57	87.55	77.69	71.88	84.62	phiSLT	77.1	0	0	31	7	21	26	47	28	29
2012_796	Carriage	9.07	7.47	12.57	10.16	37.43	45.32	14.23	NA	74.8	0	0	22	5	20	20	30	20	25
2012_798	Carriage	9.25	3.65	10.36	6.99	70.49	68.02	10.9	NA	74.8	0	0	14	2	12	12	22	14	13
2012_8	Carriage	8	5.86	10.03	10.05	34.73	48.47	11.13	NA	74.9	0	0	15	4	14	12	22	14	14
2012_800	Carriage	88.05	95.55	94.46	88.37	77.37	70.91	84.67	phiSLT	71	0	0	24	3	17	20	33	20	24
2012_802	Carriage	99.45	97.52	88.72	91.78	78.05	74.61	88.03	phiSLT	99.8	1	1	3	2	13	10	26	12	8
2012_830	Carriage	82.67	95.57	83.31	81.6	19.71	19.63	83.24	phiSLT	71	0	0	13	2	8	10	20	10	12
2012_838	Carriage	13.36	10.55	14.45	11.23	73.43	81.37	16.14	NA	76.9	0	0	15	4	12	14	23	13	18
2012_839	Carriage	87.13	97.89	99.2	90.02	29.51	20.75	87.94	phiSa2USA	100	1	1	16	4	5	12	17	12	13
2012_844	Carriage	88.11	95.63	94.6	86.95	77.69	70.91	84.64	phiSLT	77.1	0	0	27	4	19	23	39	22	26
2012_845	Carriage	7.78	4.06	7.4	8.25	31.7	46.29	8.1	NA	74.9	0	0	13	3	10	9	23	11	12
2012_855	Carriage	12.43	5.66	11.84	9.29	70.8	67.76	12.84	NA	76.9	0	0	20	5	18	17	32	19	18
2012_861	Carriage	7.9	5.94	10.68	8.78	40.5	45.28	11.38	NA	74.4	0	0	17	4	18	16	27	18	18
2012_864	Carriage	9.25	3.65	10.45	7.07	70.42	68.07	10.99	NA	74.8	0	0	14	2	12	12	21	14	13
2012_869	Carriage	7.78	4.06	7.41	8.25	31.84	46.29	8.1	NA	74.9	0	0	13	3	10	9	23	11	12
2012_870.1	Carriage	7.84	4.16	7.62	8.47	32.06	46.52	8.27	NA	76.8	0	0	14	4	11	10	24	12	13
2012_874	Carriage	64.35	93.81	65.7	64.31	43.81	48.41	66.39	NA	74.4	0	0	16	2	15	13	26	18	21
2012_875	Carriage	64.37	93.82	65.42	64.32	39.75	48.44	66.36	NA	74.4	0	0	14	2	12	11	26	15	18
2012_883	Carriage	97.5	97.55	90.07	91.06	79.09	74.45	89.2	phiSLT	99.9	1	1	21	3	23	21	36	26	22
2012_893	Carriage	99.37	97.43	89.24	91.73	81.99	75.76	88.44	phiSLT	99.8	1	1	14	4	21	17	42	29	16
2012_895	Carriage	13.34	6.2	11.41	9.83	42.52	30.39	12.05	NA	71	0	0	19	5	18	18	42	23	24
2012_898	Carriage	86.72	95.31	91.29	87.48	41.95	56.13	84.44	phiSLT	76.8	0	0	21	5	18	20	31	20	18
2012_899	Carriage	10.55	5.52	11.94	9.7	69.96	81.82	12.29	NA	71.1	0	0	15	3	11	13	25	14	15
2012_90	Carriage	64.4	93.82	65.78	64.38	45.02	49.63	66.57	NA	74.4	0	0	26	5	23	23	39	32	29
2012_910	Carriage	64.45	93.82	65.72	64.45	44.89	49.6	66.61	NA	74.4	0	0	24	5	22	20	36	30	27
2012_921	Carriage	88.63	98.76	99.72	90.58	58.94	59.15	89.42	phiSa2USA	100	1	1	20	8	9	15	30	18	18
2012_926	Carriage	9.25	3.65	10.45	7.07	70.49	68.12	10.98	NA	74.8	0	0	14	2	12	12	22	14	13
2012_931	Carriage	88.69	98.77	99.71	90.54	51.88	60.42	88.92	phiSa2USA	100	1	1	26	8	19	23	39	24	27
2012_934	Carriage	7.54	3.67	7.17	8.01	31.81	46.29	7.88	NA	74.9	0	0	12	2	9	8	22	11	11
2012_94	Carriage	8.06	3.85	9.54	7.04	63.81	76.85	12.04	NA	76.9	0	0	13	4	11	12	21	11	17
2012_946	Carriage	11.34	6.09	12.33	10.06	74.31	81.82	12.38	NA	71.1	0	0	24	5	17	19	30	19	20
2012_950	Carriage	4.74	3.67	8.87	7.4	33.54	42.54	10.2	NA	74.9	0	0	12	2	10	9	20	12	12
2012_951	Carriage	10.66	7.19	9.18	10.71	32.44	47.93	10.08	NA	74.9	0	0	15	4	13	12	29	25	15
2012_953	Carriage	87.56	95.51	94.33	88.08	77.29	70.69	83.81	phiSLT	71	0	0	17	2	11	13	26	14	17
2012_962	Carriage	86.55	95.21	91.11	87.3	41.72	55.9	84.28	phiSLT	74.9	0	0	19	3	17	19	32	19	17
2012_965	Carriage	67.98	93.82	66.18	66	45.33	49.66	65.6	NA	74.4	0	0	24	5	23	23	39	33	24
2012_970	Carriage	88.51	94.44	84.51	88.22	49.52	54.03	86.41	NA	76.7	0	0	21	5	23	21	38	29	20
2012_971.1	Carriage	12.41	11.25	15.28	13.06	42.77	48.33	13.97	NA	74.4	0	0	16	4	13	14	28	12	16
2012_974	Carriage	12.2	10.57	11.95	12.46	44.12	51.51	14.49	NA	76.4	0	0	17	4	12	13	24	14	17
2012_977	Carriage	99.44	97.52	89.22	91.84	81.83	75.82	88.03	phiSLT	99.8	1	1	13	6	20	20	39	25	17
2012_986	Carriage	2.52	4.28	4.5	4.57	21.94	19.16	4.5	NA	76.6	0	0	5	5	6	6	12	4	6
2012_988	Carriage	64.41	93.81	65.73	64.74	43.97	48.49	66.46	NA	74.4	0	0	19	2	19	17	30	19	23
2012_995	Carriage	7.47	3.87	6.66	6.61	63.8	82.77	8.78	NA	76.9	0	0	15	4	12	11	24	15	12
2012_997	Carriage	88.69	95.67	94.87	88.68	77.59	71.93	84.32	phiSLT	77.1	0	0	17	3	12	15	32	18	18
2012_998	Carriage	99.64	97.44	90.67	91.75	79.35	74.65	88.46	phiSLT	99.8	1	1	15	6	22	19	39	23	17
COP1008	Carriage	8.61	5.92	8.57	8.26	25.37	12.58	10.49	NA	76.9	0	0	15	6	13	14	23	14	14
COP1019	Carriage	64.36	93.82	65.64	64.28	44.92	49.56	66.52	NA	74.4	0	0	21	4	20	18	34	26	30
COP1020	Carriage	10.55	5.52	11.94	9.7	69.99	81.82	12.29	NA	71.1	0	0	15	3	11	13	25	14	15
COP1021	Carriage	64.45	93.81	65.71	64.74	45	49.59	66.61	NA	74.4	0	0	22	4	21	21	35	29	27
COP1030	Carriage	6.66	3.78	7.17	5.98	33.49	45.85	8.91	NA	74.7	0	0	10	3	10	10	16	13	12
COP1031	Carriage	7.59	3.76	7.38	8.22	31.9	46.52	8.05	NA	76.8	0	0	13	3	10	9	23	13	12
COP1033	Carriage	94.48	97.35	90.81	88.92	78.57	75.33	89.21	phiSLT	99.8	1	1	23	4	22	18	40	23	17
COP1041	Carriage	11.19	6.37	12.1	10.7	68.09	64.99	13.22	NA	75	0	0	13	5	13	12	24	15	16
COP1043	Carriage	11.28	11.06	14.18	12.57	45.03	49.52	15.13	NA	74.4	0	0	21	5	20	20	34	30	24
COP1072	Carriage	99.46	97.57	90.72	91.81	79.57	74.74	88.5	phiSLT	99.8	1	1	16	4	22	19	43	24	18
COP1079	Carriage	4.27	3.77	8.25	6.89	31.2	45.47	7.39	NA	76.6	0	0	10	3	9	11	22	13	12
COP1084	Carriage	7.59	3.76	7.38	8.22	32.13	46.52	8.05	NA	76.8	0	0	13	3	10	9	22	12	12
COP1097	Carriage	16.12	10.99	19.08	14.76	49.47	48.98	19.68	NA	71	0	0	17	5	18	17	22	19	14
COP1105	Carriage	11.18	12.46	12.4	12.86	24.23	13.13	14.9	NA	71	0	0	13	5	13	12	20	10	11
COP1118	Carriage	7.59	3.76	7.38	8.22	32.03	46.52	8.05	NA	76.8	0	0	13	3	10	9	23	12	12
COP1125	Carriage	9.54	4.2	9.84	7.44	69.21	65.52	11.31	NA	76.9	0	0	16	4	14	14	25	15	15
COP1138	Carriage	89.75	94.38	86.81	88.41	79.41	89.99	86.15	NA	71	0	0	18	3	19	17	31	16	16
COP1151	Carriage	30.81	45.43	35.36	32.37	71.88	68.2	35.1	NA	99.8	1	1	10	1	9	11	17	12	11
COP1152	Carriage	99.33	97.52	88.63	91.69	76.72	73.89	88.07	phiSLT	99.8	1	1	4	3	14	11	28	15	11
COP1166	Carriage	11.54	3.57	10.03	7.58	69.01	64	10.08	NA	71	0	0	14	2	11	10	25	12	13
COP1167	Carriage	7.84	4.16	7.62	8.47	32.15	46.52	8.27	NA	76.8	0	0	14	4	11	10	25	12	13
COP1183	Carriage	4.79	3.76	9	7.52	33.74	42.69	10.32	NA	76.9	0	0	13	3	11	10	20	13	13
COP1189	Carriage	99.47	97.56	89.03	91.82	80.61	75.77	88.06	phiSLT	99.8	1	1	8	2	18	13	35	21	12
COP1207	Carriage	87.51	97.6	89.38	87.48	55.65	46.47	89.13	phiSLT	99.8	1	1	24	5	21	19	35	25	22
COP1237	Carriage	89.58	93.86	86.28	85.85	39.44	56.03	84.64	NA	74.9	0	0	17	3	16	18	31	20	17
COP1245	Carriage	7.84	4.16	7.62	8.47	32.13	46.52	8.27	NA	76.8	0	0	14	4	11	10	23	12	13
COP1249	Carriage	87.67	95.67	94.46	88.31	77.56	70.82	84.39	phiSLT	77.1	0	0	19	3	14	16	28	16	19
COP1253	Carriage	5.53	3.58	4.4	4.1	9.87	4.97	5.37	NA	74.9	0	0	4	2	3	3	10	3	5
COP1272	Carriage	87.57	95.09	92.01	87.54	72.02	91.3	86.86	phiSLT	71	0	0	20	5	17	19	29	15	16
COP1281	Carriage	7.78	4.06	7.41	8.25	31.67	46.28	8.1	NA	74.9	0	0	13	3	10	9	22	11	12
COP1308	Carriage	7.54	3.67	7.17	8.01	31.87	46.29	7.88	NA	74.9	0	0	12	2	9	8	22	11	11
COP1312	Carriage	63.71	93.63	65.21	64.13	41.48	30.67	65.33	NA	74.4	0	0	22	5	21	21	30	21	28
COP1316	Carriage	86.29	95.82	95.96	86.79	79.84	75.48	85.74	phiSLT	74.8	0	0	16	3	9	15	28	18	15
COP1338	Carriage	95.77	97.52	90.67	89.75	79.49	79.09	88.95	phiSLT	99.9	1	1	21	6	25	20	47	26	20
COP1342	Carriage	87.51	97.6	89.16	87.52	55.6	46.4	89.1	phiSLT	99.8	1	1	18	4	12	13	30	16	16
COP1348	Carriage	87.84	95.55	94.32	88.12	77.3	70.69	83.82	phiSLT	71	0	0	17	2	11	14	27	14	17
COP136	Carriage	6.16	3.87	7.18	6.48	34.09	44.71	9.27	NA	74.8	0	0	11	3	9	9	20	15	12
COP1372	Carriage	7.59	3.76	7.38	8.22	32.05	46.52	8.05	NA	76.8	0	0	13	3	10	9	23	12	12
COP1378	Carriage	7.59	3.76	7.38	8.22	32.14	46.52	8.05	NA	76.8	0	0	13	3	10	9	26	12	12
COP1407	Carriage	10.15	6.3	13.28	9.62	71.91	63.26	11.58	NA	71	0	0	16	5	15	16	24	14	16
COP1413	Carriage	99.36	97.36	90.69	91.72	79.43	74.69	87.95	phiSLT	99.8	1	1	5	2	16	12	30	15	9
COP1433	Carriage	13.85	7.37	14.7	13.72	75.4	83.22	13.73	NA	71.1	0	0	24	6	21	19	33	19	25
COP1455	Carriage	89.01	95.83	94.81	87.67	77.87	72.21	83.95	phiSLT	77.1	0	0	17	4	10	14	32	20	18
COP1458	Carriage	89.51	94	86.55	86.08	39.64	56.27	84.83	NA	76.8	0	0	18	4	18	20	34	21	19
COP1477	Carriage	99.37	97.43	90.65	91.73	78.68	75.71	88.57	phiSLT	99.8	1	1	9	4	19	16	35	19	14
COP1496	Carriage	94.02	94.38	85.27	87.88	28.7	21.25	87.77	NA	74.9	0	0	9	2	14	13	24	14	9
COP1498	Carriage	11.45	11.03	15.95	12.99	43.98	48.48	14.86	NA	74.4	0	0	21	5	18	18	32	26	24
COP1514	Carriage	99.7	97.56	88.8	91.8	78.22	74.73	88.48	phiSLT	99.8	1	1	15	3	21	19	34	21	17
COP1525	Carriage	88.07	95.62	94.53	88.28	77.72	70.97	84.61	phiSLT	77.1	0	0	27	4	22	23	40	23	27
COP1527	Carriage	8	5.94	10.67	8.76	40.43	45.16	11.34	NA	74.4	0	0	15	4	12	12	25	16	16
COP153	Carriage	7.84	4.16	7.62	8.47	32.06	46.52	8.27	NA	76.8	0	0	14	4	11	10	26	12	14
COP1534	Carriage	7.78	4.06	7.41	8.25	31.89	46.28	8.1	NA	74.9	0	0	13	3	10	9	23	11	12
COP155	Carriage	11.93	11.13	14.58	14.52	45.53	46.6	16	NA	74.9	0	0	17	4	14	14	25	14	18
COP1576	Carriage	11.83	11.88	14.24	13.12	38.47	49.49	15.6	NA	74.4	0	0	22	5	21	18	34	26	26
COP1579	Carriage	99.47	97.56	88.8	91.81	78.19	74.72	88.48	phiSLT	99.8	1	1	15	3	21	19	35	21	17
COP158	Carriage	66.21	93.89	66.37	65.6	45.06	49.36	66.49	NA	74.4	0	0	32	11	30	26	41	33	36
COP1589	Carriage	88.93	98.77	99.73	90.74	51.51	60.42	88.93	phiSa2USA	100	1	1	26	6	14	18	34	21	21
COP160	Carriage	99.43	97.52	90.18	91.77	78.22	75.33	88	phiSLT	99.8	1	1	12	3	22	18	39	18	15
COP1609	Carriage	99.45	97.56	88.64	91.86	83.44	77.5	88.05	phiSLT	99.8	1	1	14	4	22	20	39	26	16
COP161	Carriage	86.65	95.21	91.1	87.24	41.61	55.86	84.27	phiSLT	74.9	0	0	18	2	15	17	29	18	15
COP1613	Carriage	10.72	5.83	11.69	11.08	75.01	83.12	12.61	NA	71.1	0	0	16	4	11	9	23	13	15
COP1621	Carriage	3.31	3.13	3.71	3.76	9.01	4.15	6.27	NA	76.9	0	0	4	3	3	3	9	3	5
COP1629	Carriage	90.38	95.92	90.79	86.71	78.16	75.74	87.18	phiSLT	76.8	0	0	10	3	9	12	24	16	11
COP1632	Carriage	12.63	10.86	15	14.95	42.36	48.05	16.65	NA	76.4	0	0	14	4	14	15	30	16	16
COP1646	Carriage	99.72	97.56	88.76	91.82	77.94	74.64	88.07	phiSLT	99.8	1	1	2	1	12	8	25	11	7
COP1657	Carriage	11.9	10.92	14.17	13.14	36.9	49.1	15.18	NA	76.8	0	0	15	5	14	13	25	16	16
COP1659	Carriage	11.39	5.95	11.35	10.19	41.76	46.22	11.55	NA	74.4	0	0	20	5	21	20	33	22	22
COP166	Carriage	4.27	3.77	8.25	6.89	31.11	45.46	7.39	NA	76.6	0	0	10	3	9	11	23	13	12
COP1660	Carriage	11.38	5.94	11.2	10.13	41.78	46.15	11.49	NA	74.4	0	0	16	4	15	17	31	18	19
COP1662	Carriage	13.36	12.77	12.38	14.14	37.09	53.07	14.55	NA	76.9	0	0	18	6	18	17	31	22	19
COP1671	Carriage	99.37	97.4	90.6	91.73	79.93	75.64	87.99	phiSLT	99.8	1	1	7	3	15	13	31	18	12
COP1701	Carriage	99.61	97.41	89.32	91.78	81.72	75.85	88.44	phiSLT	99.8	1	1	15	4	21	19	36	25	16
COP1706	Carriage	7.84	4.16	7.62	8.47	32.08	46.52	8.27	NA	76.8	0	0	14	4	11	10	23	12	13
COP1736	Carriage	7.84	4.16	7.62	8.47	32.15	46.52	8.27	NA	76.8	0	0	14	4	11	10	24	12	13
COP1777	Carriage	7.54	3.67	7.17	8.01	31.84	46.29	7.88	NA	74.9	0	0	12	2	9	8	24	11	11
COP1785	Carriage	6.2	3.74	7.4	6.72	33.1	43.83	9.72	NA	76.4	0	0	13	3	11	12	21	14	15
COP1819	Carriage	88.07	95.56	94.4	88.23	78.91	70.9	83.87	phiSLT	77.1	0	0	25	4	18	21	37	20	23
COP1840	Carriage	7.78	4.06	7.41	8.25	31.9	46.29	8.1	NA	74.9	0	0	13	3	10	9	23	12	12
COP1846	Carriage	99.45	97.56	91.9	91.91	78.68	75.91	89.23	phiSLT	99.8	1	1	9	4	17	17	36	20	15
COP1854	Carriage	13.25	6.3	12.93	9.35	71.34	64.47	13.28	NA	76.9	0	0	16	6	16	15	24	15	18
COP1871	Carriage	7.78	4.06	7.41	8.25	31.94	46.29	8.1	NA	74.9	0	0	13	3	10	9	24	11	12
COP1878	Carriage	94.45	96.81	88.3	88.28	82.13	77.56	88.33	phiSLT	99.8	1	1	20	8	25	22	49	31	20
COP1882	Carriage	89.12	93.51	88.59	89.13	46.1	58.16	88.69	NA	76.8	0	0	23	8	24	23	35	32	23
COP1884	Carriage	4.44	3.87	9.08	7.43	32.46	45.41	9.89	NA	76.6	0	0	12	4	10	10	19	13	14
COP190	Carriage	7.84	4.16	7.62	8.47	32.08	46.52	8.27	NA	76.8	0	0	14	4	11	10	22	12	13
COP1914	Carriage	7.84	4.16	7.62	8.47	32.06	46.52	8.27	NA	76.8	0	0	14	4	11	10	26	12	13
COP192	Carriage	89.59	93.9	86.19	85.61	39.23	56.07	84.68	NA	74.9	0	0	10	5	12	13	25	15	13
COP193	Carriage	99.68	97.55	88.73	91.79	78.04	74.6	88.04	phiSLT	99.8	1	1	4	3	14	11	27	13	9
COP1939	Carriage	7.84	4.16	7.62	8.47	32.15	46.52	8.27	NA	76.8	0	0	14	4	11	10	23	12	13
COP1947	Carriage	99.38	97.4	88.92	91.78	80.44	75.73	88.41	phiSLT	99.8	1	1	9	2	18	14	34	20	11
COP196	Carriage	9.51	6.56	10.35	10.03	44.51	47.59	12.05	NA	72.5	0	0	19	7	15	15	29	19	20
COP1960	Carriage	98.37	97.55	89.18	91.35	78.62	74.27	88.98	phiSLT	99.9	1	1	8	2	14	9	25	16	10
COP1967	Carriage	87.85	95.55	94.39	88.19	77.59	70.79	84.53	phiSLT	71	0	0	26	3	20	21	39	22	26
COP1975	Carriage	98.89	97.1	90.37	91.43	77.64	75.45	88.7	phiSLT	99.8	1	1	11	3	18	14	39	22	12
COP198	Carriage	99.68	97.56	90.22	91.81	78.41	75.32	88.04	phiSLT	99.8	1	1	14	3	22	19	40	20	16
COP1981	Carriage	99.35	97.39	90.71	91.7	79.36	74.68	88.39	phiSLT	99.8	1	1	17	5	24	20	36	22	18
COP1982	Carriage	11.63	3.69	10.28	7.83	69.13	64.17	10.18	NA	77.1	0	0	15	3	13	12	26	14	14
COP1996	Carriage	6.54	3.77	8.66	8.6	33.96	46.56	9.71	NA	74.9	0	0	13	3	12	10	20	10	12
COP2019	Carriage	14.22	6.42	14.35	9.99	70.69	64.51	11.73	NA	77.1	0	0	23	6	19	19	34	19	20
COP2027	Carriage	12.01	12.18	14.84	13.31	44.93	49.5	15.82	NA	74.4	0	0	24	6	21	20	35	28	28
COP2028	Carriage	12.01	12.18	14.75	13.29	44.98	49.46	15.73	NA	74.4	0	0	19	4	17	17	31	22	21
COP2031	Carriage	7.8	4.09	7.58	8.43	31.98	46.48	8.27	NA	76.8	0	0	14	4	11	10	26	12	13
COP2041	Carriage	13.23	12.18	14.73	14.81	38.48	52.15	15.89	NA	74.9	0	0	19	5	20	18	28	26	20
COP2046	Carriage	7.59	3.76	7.38	8.22	32.04	46.52	8.05	NA	76.8	0	0	13	3	10	9	23	12	12
COP2047	Carriage	7.59	3.76	7.38	8.22	32.09	46.52	8.05	NA	76.8	0	0	13	3	10	9	25	12	12
COP2051	Carriage	7.84	4.16	7.62	8.47	32.19	46.51	8.27	NA	76.8	0	0	14	4	11	10	24	13	13
COP2053	Carriage	6.13	3.62	7.29	6.61	32.93	43.72	9.61	NA	74.8	0	0	12	2	10	11	22	13	14
COP2081	Carriage	7.84	4.16	7.62	8.47	31.85	46.52	8.27	NA	76.8	0	0	14	4	11	10	25	12	13
COP2103	Carriage	98.08	97.55	91.86	91.43	78.79	75.34	89.06	phiSLT	99.9	1	1	15	3	21	20	41	20	17
COP2106	Carriage	88.07	93.67	91.01	88.37	43.29	58.41	84.29	NA	74.9	0	0	21	4	22	24	33	20	21
COP2108	Carriage	6.41	5.26	10.07	7.62	19.57	8.15	11.85	NA	71	0	0	12	4	13	13	20	12	16
COP2109	Carriage	66.45	88.09	65.27	64.93	19.06	12.72	66.86	NA	74.9	0	0	9	2	12	11	23	12	11
COP2120	Carriage	12.14	12.24	16.59	14.21	42.47	46.76	16.91	NA	74.4	0	0	23	7	22	21	37	21	30
COP2138	Carriage	7.54	3.67	7.17	8.01	31.83	46.29	7.88	NA	74.9	0	0	12	2	9	8	23	11	11
COP2139	Carriage	9.01	6.12	11.07	12.36	39.68	43.89	11.06	NA	74.9	0	0	17	5	15	15	28	16	16
COP214	Carriage	86.26	95.81	95.99	86.79	79.69	75.43	85.8	phiSLT	74.8	0	0	15	2	8	14	25	17	14
COP2143	Carriage	7.91	5.94	10.68	8.78	40.5	45.27	11.34	NA	74.4	0	0	19	4	21	18	29	20	20
COP2154	Carriage	88.73	94.44	84.51	88.2	49.56	54.01	86.4	NA	76.7	0	0	22	5	23	20	37	31	20
COP2165	Carriage	7.78	4.06	7.41	8.25	31.89	46.29	8.1	NA	74.9	0	0	13	3	10	9	23	11	12
COP2175	Carriage	11.56	3.57	10.14	7.69	68.88	64.02	10.08	NA	71	0	0	14	2	12	11	24	12	13
COP2179	Carriage	7.84	4.16	7.62	8.47	32.03	46.52	8.27	NA	76.8	0	0	14	4	11	10	24	12	13
COP2180	Carriage	19.04	5.71	15.81	14.31	74.05	69.83	14.57	NA	99.8	1	1	14	4	14	13	25	13	13
COP2193	Carriage	88.91	98.77	99.73	90.52	51.21	60.38	88.91	phiSa2USA	100	1	1	19	7	8	13	26	17	17
COP2214	Carriage	88.11	95.62	94.62	86.97	77.69	70.91	84.66	phiSLT	77.1	0	0	28	5	20	24	40	22	27
COP2232	Carriage	97.02	97.52	88.95	91.27	81.16	75.34	88.88	phiSLT	99.9	1	1	15	5	18	14	32	21	15
COP2233	Carriage	7.59	3.76	7.38	8.22	32.11	46.52	8.05	NA	76.8	0	0	13	3	10	9	25	12	12
COP2245	Carriage	99.6	97.39	88.67	91.75	77.92	75.54	87.97	phiSLT	99.8	1	1	8	3	16	15	31	19	12
COP2266	Carriage	87.9	95.67	94.52	88.34	77.71	70.96	84.63	phiSLT	77.1	0	0	27	4	22	23	39	23	27
COP2280	Carriage	7.78	4.06	7.41	8.25	31.89	46.29	8.1	NA	74.9	0	0	13	3	10	9	24	11	12
COP2282	Carriage	12.94	10.84	17.05	15.41	41.61	45.45	17.91	NA	76.9	0	0	14	5	15	14	22	17	18
COP2284	Carriage	7.78	4.06	7.41	8.25	31.89	46.29	8.1	NA	74.9	0	0	13	3	10	9	23	11	12
COP2285	Carriage	8.6	3.76	10.86	9.36	62.86	80.03	11.52	NA	74.8	0	0	15	3	12	10	20	10	14
COP2291	Carriage	99.45	97.53	88.81	91.84	80.4	75.73	88.04	phiSLT	99.8	1	1	11	7	21	19	38	21	14
COP2299	Carriage	86.32	95.82	95.98	86.79	79.88	75.47	85.75	phiSLT	74.8	0	0	16	3	9	15	28	18	15
COP2303	Carriage	13.01	10.67	12.86	13.48	38.79	49.88	13.17	NA	74.9	0	0	20	3	18	17	35	20	19
COP2311	Carriage	64.38	93.82	65.73	64.69	43.73	48.4	66.27	NA	74.4	0	0	17	2	16	16	33	19	23
COP2315	Carriage	7.54	3.67	7.17	8.01	31.96	46.23	7.88	NA	74.9	0	0	12	2	9	8	22	12	11
COP2326	Carriage	99.69	97.55	90.68	91.79	77.89	75.7	89.02	phiSLT	99.8	1	1	10	3	19	15	38	22	13
COP2338	Carriage	87.69	95.67	94.39	88.34	77.66	70.86	84.38	phiSLT	77.1	0	0	25	4	19	21	35	21	25
COP2358	Carriage	64.45	93.82	65.81	64.76	45.01	49.52	66.52	NA	74.4	0	0	23	4	25	21	38	29	29
COP2367	Carriage	88.49	94.38	84.37	88.06	49.33	53.41	86.32	NA	74.9	0	0	20	4	23	20	38	29	18
COP2368	Carriage	9.54	4.2	9.84	7.44	69.21	65.52	11.31	NA	76.9	0	0	16	4	14	14	25	15	15
COP2371	Carriage	7.78	4.06	7.41	8.25	31.89	46.29	8.1	NA	74.9	0	0	13	3	10	9	22	11	12
COP2375	Carriage	7.84	4.16	7.62	8.47	32.06	46.5	8.27	NA	76.8	0	0	14	4	11	10	25	12	13
COP2376	Carriage	7.59	3.76	7.38	8.22	32.05	46.52	8.05	NA	76.8	0	0	13	3	10	9	21	12	12
COP2382	Carriage	15.2	6.07	14.49	10.16	69.81	65.24	12.46	NA	71	0	0	19	4	16	14	40	20	16
COP2388	Carriage	9.47	4.09	9.71	7.31	68.99	65.38	11.22	NA	74.8	0	0	15	3	13	13	24	14	14
COP2400	Carriage	7.9	5.94	10.65	8.76	40.24	45.18	11.33	NA	74.4	0	0	14	4	11	12	26	16	15
COP2427	Carriage	99.71	97.56	90.69	91.82	79.36	74.73	88.06	phiSLT	99.8	1	1	10	3	18	16	35	18	14
COP2431	Carriage	13.37	10.57	14.45	11.22	73.44	81.37	16.14	NA	76.9	0	0	16	4	13	16	26	13	21
COP2432	Carriage	86.5	95.89	96.08	86.93	80.17	75.63	85.83	phiSa2USA	76.8	0	0	14	3	7	13	26	16	12
COP245	Carriage	13.63	10.45	17.41	11.37	78.19	71.75	15.31	NA	71	0	0	16	3	13	13	29	13	13
COP2464	Carriage	99.38	97.43	89.29	91.77	82.02	75.76	88.43	phiSLT	99.8	1	1	16	6	23	19	42	27	17
COP2483	Carriage	11.89	10.84	13.95	13.44	36.65	48.72	15.1	NA	74.9	0	0	20	6	22	20	26	22	22
COP2492	Carriage	11.75	7.37	10.7	11.49	74.86	84.95	14.23	NA	76.8	0	0	29	8	23	22	34	27	25
COP2496	Carriage	14.43	11.18	14.16	13.26	37.7	51.21	15.29	NA	74.9	0	0	19	5	16	15	28	25	19
COP2519	Carriage	87.72	97.73	89.44	87.48	55.7	46.46	89.16	phiSLT	99.8	1	1	26	7	21	22	38	27	25
COP2530	Carriage	7.78	4.06	7.41	8.25	31.86	46.29	8.1	NA	74.9	0	0	13	3	10	9	22	11	12
COP2531	Carriage	98.03	97.79	97.13	94.61	80.74	73.78	90.02	phiSLT	99.9	1	1	62	39	62	63	39	24	65
COP2532	Carriage	7.84	4.16	7.62	8.47	31.91	46.52	8.27	NA	76.8	0	0	14	4	11	10	24	12	13
COP2543	Carriage	7.59	3.76	7.38	8.22	32.09	46.52	8.05	NA	76.8	0	0	13	3	10	9	24	12	12
COP2544	Carriage	7.84	4.16	7.62	8.47	32.09	46.52	8.27	NA	76.8	0	0	14	4	11	10	24	12	13
COP255	Carriage	35.34	45.43	39.76	34.11	77.29	70.68	36.19	NA	99.8	1	1	12	2	11	13	23	16	13
COP259	Carriage	14.44	10.62	16.44	13.16	42.23	54.66	15.1	NA	75	0	0	14	3	14	13	25	14	14
COP285	Carriage	99.39	97.43	90.68	91.72	78.13	75.79	88.51	phiSLT	99.8	1	1	14	3	23	19	44	20	16
COP295	Carriage	7.54	3.67	7.17	8.01	31.65	46.29	7.88	NA	74.9	0	0	12	2	9	8	24	11	11
COP301	Carriage	86.89	89.98	83.49	85.91	63.6	83.29	86.11	NA	74.8	0	0	13	4	17	13	26	18	12
COP313	Carriage	9.5	4.09	10.71	7.32	70.37	68.08	11.22	NA	74.8	0	0	16	4	14	14	22	14	15
COP322	Carriage	9.47	4.09	10.7	7.3	70.41	68.15	11.21	NA	74.7	0	0	16	4	14	14	25	15	15
COP327	Carriage	7.78	4.06	7.41	8.25	31.94	46.29	8.1	NA	74.9	0	0	13	3	10	9	21	11	12
COP349	Carriage	11.63	3.69	10.28	7.82	69.12	64.17	10.18	NA	77.1	0	0	15	3	13	12	25	13	14
COP357	Carriage	7.78	4.06	7.41	8.25	31.94	46.29	8.1	NA	74.9	0	0	13	3	10	9	22	11	12
COP362	Carriage	7.59	3.76	7.38	8.22	32.15	46.52	8.05	NA	76.8	0	0	13	3	10	9	24	12	12
COP39	Carriage	9.31	3.76	10.57	7.2	70.66	68.25	11.07	NA	76.7	0	0	15	3	13	13	23	15	14
COP434	Carriage	99.71	97.56	88.75	91.81	77.92	74.64	88.06	phiSLT	99.8	1	1	3	2	13	9	25	12	8
COP442	Carriage	10.96	10.65	14.53	12.73	46.14	47.62	16.29	NA	74.4	0	0	21	5	19	19	38	27	23
COP45	Carriage	11.48	5.88	9.28	11.14	39.78	48.42	12.55	NA	76.9	0	0	15	5	14	10	27	14	15
COP463	Carriage	99.7	97.56	88.8	91.8	78.22	74.73	88.48	phiSLT	99.8	1	1	14	2	20	18	34	20	16
COP469	Carriage	8.05	5.97	10.26	10.26	34.8	48.39	11.26	NA	76.8	0	0	19	5	18	15	24	20	17
COP49	Carriage	91.78	97.94	90.06	90.41	79.25	76.48	88.63	phiSLT	99.9	1	1	11	2	13	11	26	13	14
COP490	Carriage	88.23	97.32	88.81	88.77	57.6	45.32	88.74	phiSLT	99.8	1	1	41	17	31	32	44	32	36
COP493	Carriage	7.84	4.16	7.62	8.47	32.07	46.52	8.27	NA	76.8	0	0	14	4	11	10	26	12	13
COP496	Carriage	10.78	6.09	12.34	10.05	76.39	81.61	12.94	NA	71.1	0	0	25	5	20	24	35	25	23
COP512	Carriage	7.54	3.67	7.17	8.01	31.83	46.07	7.88	NA	74.9	0	0	12	2	9	8	22	12	11
COP513	Carriage	11.38	5.95	11.28	10.07	41.51	46.34	11.51	NA	74.4	0	0	20	5	23	22	38	26	24
COP542	Carriage	11.19	7.02	11.55	11.93	75.75	83.11	13.26	NA	71.1	0	0	21	5	19	15	31	16	21
COP548	Carriage	91.09	95.92	90.85	89.25	41.2	56.26	85.63	phiSLT	76.8	0	0	35	21	34	35	32	23	35
COP55	Carriage	10.67	3.67	7.35	8.41	40.65	29.53	9.56	NA	76.9	0	0	11	3	9	8	28	14	13
COP561	Carriage	9.32	3.77	10.58	7.2	70.66	68.26	11.07	NA	76.8	0	0	15	3	13	13	23	15	14
COP569	Carriage	9.39	6.01	9.49	8.23	44.24	31.99	11.12	NA	71	0	0	14	5	14	15	26	18	16
COP580	Carriage	59.39	94.02	61.18	60.32	43.05	48.47	61.03	NA	74.4	0	0	13	2	10	10	24	14	14
COP584	Carriage	13.56	6.42	14.35	9.9	68.96	62.63	12.45	NA	77.1	0	0	20	6	17	16	28	17	19
COP596	Carriage	11.71	3.9	8.13	6.07	37.31	50.91	9.06	NA	77.1	0	0	14	4	12	11	22	15	13
COP601	Carriage	87.89	95.62	94.53	86.82	77.5	70.84	83.94	phiSLT	77.1	0	0	18	3	9	14	28	15	18
COP605	Carriage	12.92	5.2	13.28	10.1	73.92	66.46	13.32	NA	71	0	0	23	3	22	20	31	23	23
COP609	Carriage	9.7	8.86	11.88	10.35	33.35	43.06	12.53	NA	74.8	0	0	11	2	10	10	20	14	13
COP622	Carriage	7.84	4.16	7.62	8.46	32.19	46.52	8.27	NA	76.8	0	0	14	4	11	10	25	12	13
COP637	Carriage	9.31	3.77	10.58	7.2	70.7	68.25	11.07	NA	76.8	0	0	15	3	13	13	23	15	14
COP638	Carriage	14.74	6.01	11	13.31	41.44	30.71	12.79	NA	71	0	0	21	5	19	17	37	23	23
COP678	Carriage	88.72	98.77	99.72	90.75	52.01	60.44	88.92	phiSa2USA	100	1	1	29	9	20	25	39	26	28
COP680	Carriage	7.42	5.08	9.13	9.15	22.92	7.78	11.12	NA	76.9	0	0	14	4	11	13	21	11	14
COP693	Carriage	7.84	4.16	7.62	8.47	32.13	46.52	8.27	NA	76.8	0	0	14	4	11	10	22	12	13
COP71	Carriage	90.06	93.99	86.67	88.45	72.73	91.77	88.71	NA	71	0	0	22	6	25	25	38	22	23
COP714	Carriage	88.46	94.37	84.39	88.11	49.62	53.97	86.39	NA	76.7	0	0	14	3	15	13	35	27	12
COP720	Carriage	7.78	4.06	7.41	8.25	31.91	46.22	8.1	NA	74.9	0	0	13	3	10	9	24	12	12
COP723	Carriage	13.32	12.29	14.95	14.54	38.86	52.4	16.01	NA	76.8	0	0	25	7	23	22	34	31	26
COP727	Carriage	88.63	98.71	99.7	90.8	59.11	59.26	89.43	phiSa2USA	100	1	1	29	11	21	26	42	26	26
COP744	Carriage	64.7	93.36	67.28	64.61	43.87	48.48	66.08	NA	74.4	0	0	28	7	26	25	42	35	30
COP770	Carriage	99.67	97.57	90.76	91.8	78.54	75.76	88.58	phiSLT	99.8	1	1	15	4	24	20	45	21	17
COP780	Carriage	88.7	98.77	99.73	90.73	51.52	60.38	88.92	phiSa2USA	100	1	1	28	8	16	20	36	24	23
COP820	Carriage	13.13	10.57	14.32	13.04	72.91	84.4	16.48	NA	76.7	0	0	15	4	12	10	23	13	17
COP838	Carriage	99.61	97.42	90.6	91.73	79.94	75.56	87.99	phiSLT	99.8	1	1	11	6	19	16	35	19	15
COP848	Carriage	88.99	98.76	99.77	90.81	51.51	60.43	88.98	phiSa2USA	100	1	1	25	4	13	17	35	20	20
COP850	Carriage	7.78	4.06	7.41	8.25	31.85	46.29	8.1	NA	74.9	0	0	13	3	10	9	22	11	12
COP867	Carriage	87.71	97.58	89.31	87.51	55.5	46.39	89.08	phiSLT	99.8	1	1	19	4	15	15	29	17	18
COP905	Carriage	99.25	97.35	90.51	91.77	79.32	74.34	88.39	phiSLT	99.8	1	1	7	3	16	13	28	16	11
COP932	Carriage	7.8	6.03	11.02	9.43	39.19	47.99	13.93	NA	75	0	0	20	4	17	20	37	22	24
COP946	Carriage	7.54	3.67	7.17	8.01	31.9	46.29	7.88	NA	74.9	0	0	12	2	9	8	25	11	11
COP948	Carriage	11.63	3.69	10.28	7.83	69.13	64.17	10.18	NA	77.1	0	0	15	3	13	12	26	13	14
COP974	Carriage	65.1	93.85	65.74	64.46	45.16	49.57	66.64	NA	74.4	0	0	30	10	26	27	40	33	32
COP975	Carriage	99.43	97.5	90.7	91.77	78.26	75.65	88.61	phiSLT	99.8	1	1	12	4	19	15	35	18	14
COP980	Carriage	7.78	4.06	7.41	8.25	31.97	46.27	8.1	NA	74.9	0	0	13	3	10	9	23	12	12
PYO1007	Pyomyositis	93.08	97.26	92.02	94.15	50.55	57.92	91.34	phiSLT	99.9	1	1	21	6	30	23	41	30	23
PYO1132	Pyomyositis	99.67	97.55	90.73	91.8	78.09	75.79	88.58	phiSLT	99.8	1	1	13	2	22	18	44	19	15
PYO1146	Pyomyositis	98.35	97.51	92.07	92.65	81.52	75.16	90.32	phiSLT	99.9	1	1	14	3	16	14	29	20	14
PYO1224	Pyomyositis	99.45	97.56	90.21	91.8	78.23	75.33	88.06	phiSLT	99.7	1	1	12	3	22	18	41	18	15
PYO1225	Pyomyositis	22.33	12.56	23.45	22.22	86.07	96.77	20.98	phiPVL	99.7	1	1	25	5	21	21	49	33	20
PYO1230	Pyomyositis	99.47	97.56	90.18	91.82	78.37	75.24	88.07	phiSLT	99.8	1	1	11	4	19	16	35	17	15
PYO1232	Pyomyositis	99.31	97.36	88.76	91.77	80.5	75.65	88.4	phiSLT	99.8	1	1	12	2	19	16	39	20	13
PYO1268	Pyomyositis	99.43	97.56	90.54	91.73	78.39	75.55	88.97	phiSLT	99.8	1	1	7	2	13	9	31	17	8
PYO1300	Pyomyositis	99.7	97.56	91.92	91.92	78.25	75.84	89.14	phiSLT	99.8	1	1	8	2	15	13	36	20	12
PYO1350	Pyomyositis	99.47	97.56	90.59	91.72	78.34	75.69	88.53	phiSLT	99.8	1	1	6	2	14	10	32	17	9
PYO1354	Pyomyositis	99.43	97.49	90.55	91.68	78.32	75.67	88.49	phiSLT	99.8	1	1	6	2	13	10	32	16	8
PYO1391	Pyomyositis	99.37	97.43	89.3	91.73	81.87	75.72	87.99	phiSLT	99.8	1	1	12	6	21	19	40	23	15
PYO1536	Pyomyositis	99.44	97.56	91.92	91.93	78.65	75.97	88.7	phiSLT	99.8	1	1	13	5	18	19	39	21	16
PYO1544	Pyomyositis	99.46	97.56	89.31	91.82	82.02	75.84	88.52	phiSLT	99.8	1	1	13	3	18	16	42	28	15
PYO1551	Pyomyositis	99.41	97.46	88.69	91.74	77.88	74.58	88	phiSLT	99.8	1	1	4	3	14	11	27	13	9
PYO1627	Pyomyositis	99.37	97.44	90.6	91.73	79.4	74.74	87.97	phiSLT	99.8	1	1	13	6	20	18	34	20	17
PYO1702	Pyomyositis	99.45	97.56	90.68	91.77	78.57	75.74	89	phiSLT	99.8	1	1	18	4	21	18	44	25	17
PYO1709	Pyomyositis	95.77	97.54	90.66	89.78	79.76	78.55	88.92	phiSLT	99.9	1	1	21	3	24	20	44	24	19
PYO1823	Pyomyositis	99.47	97.56	88.81	91.81	78.15	74.73	88.48	phiSLT	99.8	1	1	15	3	21	19	34	21	17
PYO1862	Pyomyositis	99.46	97.55	91.45	92.36	78.38	75.18	89.14	phiSLT	99.8	1	1	9	2	16	16	28	17	12
PYO1952	Pyomyositis	88.72	98.76	99.75	90.78	52.01	60.44	88.94	phiSa2USA	100	1	1	30	10	21	26	41	26	29
PYO2095	Pyomyositis	99.32	97.38	88.64	91.79	80.86	76.45	88.42	phiSLT	99.8	1	1	14	3	21	19	41	26	16
PYO2134	Pyomyositis	99.74	97.56	88.77	91.83	77.99	74.64	88.08	phiSLT	99.8	1	1	2	1	12	9	24	11	7
PYO2151	Pyomyositis	95.18	97.55	88.05	90.19	72.63	92.36	89.93	phiSLT	99.9	1	1	17	4	23	17	33	22	18
PYO2160	Pyomyositis	99.36	97.43	90.48	91.67	77.84	75.56	88.91	phiSLT	99.8	1	1	7	2	14	11	32	18	9
PYO2244	Pyomyositis	96.01	97.39	91.08	90.25	78.77	77.33	89.77	phiSLT	99.9	1	1	12	2	16	13	26	19	15
PYO2416	Pyomyositis	97.2	97.92	95.32	93.03	80.47	74.79	89.42	phiSLT	99.9	1	1	44	24	44	47	42	29	46
PYO2492	Pyomyositis	99.44	97.56	88.7	91.82	77.94	74.51	88.51	phiSLT	99.8	1	1	4	2	13	9	26	13	8
PYO2502	Pyomyositis	92.88	97.35	90.41	88.32	81.51	79.16	90.71	phiSLT	99.8	1	1	21	3	21	19	31	25	18
PYO2506	Pyomyositis	99.38	97.43	90.63	91.73	79.6	74.74	88.44	phiSLT	99.8	1	1	14	4	19	17	40	22	16
PYO2530	Pyomyositis	98.13	97.54	91.86	91.47	81.07	76.4	89.59	phiSLT	99.9	1	1	22	4	24	21	41	32	19
PYO2767	Pyomyositis	94.15	97.62	88.56	90.31	44.31	58.95	90.66	phiSLT	99.8	1	1	19	3	19	18	29	18	16
PYO2785	Pyomyositis	99.69	97.56	88.74	91.79	77.93	74.64	88.05	phiSLT	99.8	1	1	3	2	13	9	25	12	8
PYO2789	Pyomyositis	99.44	97.56	91.91	91.93	78.23	74.86	88.7	phiSLT	99.8	1	1	3	2	12	10	28	13	9
PYO2844	Pyomyositis	88.69	98.77	99.73	90.54	51.88	60.42	88.91	phiSa2USA	100	1	1	27	9	20	24	38	25	28
PYO2846	Pyomyositis	99.39	97.43	90.7	91.72	78.11	75.81	88.95	phiSLT	99.8	1	1	16	3	23	20	39	22	17
PYO2866	Pyomyositis	99.46	97.52	89.36	91.85	82	75.76	88.5	phiSLT	99.8	1	1	12	2	18	15	40	25	13
PYO2874	Pyomyositis	99.61	97.38	90.07	91.73	75.7	75.83	87.99	phiSLT	99.8	1	1	13	4	22	19	37	18	16
PYO2923	Pyomyositis	98.03	97.55	90.4	91.42	78.91	74.43	89.58	phiSLT	99.9	1	1	18	2	20	19	32	25	19
PYO2994	Pyomyositis	88.72	98.76	99.74	90.77	51.83	60.44	88.94	phiSa2USA	100	1	1	28	9	20	24	38	25	27
PYO3032	Pyomyositis	99.68	97.55	88.78	91.79	78.27	74.7	88.47	phiSLT	99.8	1	1	15	3	20	18	35	21	17
PYO3085	Pyomyositis	99.68	97.56	90.69	91.78	78.79	75.81	88.57	phiSLT	99.8	1	1	18	5	23	20	44	23	17
PYO3092	Pyomyositis	88.65	98.76	99.72	90.8	58.91	59.25	89.44	phiSa2USA	100	1	1	27	9	19	24	37	24	24
PYO3195	Pyomyositis	99.45	97.54	90.71	91.79	79.7	74.66	88.51	phiSLT	99.8	1	1	15	5	21	18	40	24	17
PYO3206	Pyomyositis	99.38	97.38	89.31	91.77	82.27	75.76	88	phiSLT	99.8	1	1	8	3	17	15	34	19	11
PYO3233	Pyomyositis	99.37	97.4	89.07	91.72	81.87	75.74	87.98	phiSLT	99.8	1	1	5	2	13	10	29	16	9
PYO3366	Pyomyositis	99.6	97.4	89.29	91.75	81.88	75.69	88.4	phiSLT	99.8	1	1	12	3	20	17	34	21	14
PYO3415	Pyomyositis	99.58	97.39	89.13	91.68	82.01	75.76	87.95	phiSLT	99.8	1	1	11	5	22	17	40	23	16
PYO3422	Pyomyositis	88.67	98.76	99.72	90.52	51.79	60.42	88.9	phiSa2USA	100	1	1	27	9	20	24	40	25	28
PYO351	Pyomyositis	99.61	97.4	90.73	91.75	79.25	74.76	88.44	phiSLT	99.8	1	1	14	4	19	18	32	20	15
PYO352	Pyomyositis	99.37	97.41	89.22	91.72	82.04	75.77	88.43	phiSLT	99.8	1	1	17	7	23	19	42	30	19
PYO353	Pyomyositis	98.29	97.54	91.87	91.44	78.78	75.32	89.07	phiSLT	99.9	1	1	15	1	19	19	37	21	15
PYO3540	Pyomyositis	98.08	97.55	90.13	92.44	79.36	90.42	90.42	phiSLT	99.9	1	1	23	5	29	21	40	29	21
PYO356	Pyomyositis	99.61	97.43	90.66	91.73	78.79	75.78	88.97	phiSLT	99.8	1	1	20	5	23	21	41	25	18
PYO3655	Pyomyositis	99.46	97.56	88.79	91.79	78.16	74.73	88.46	phiSLT	99.8	1	1	15	3	21	18	36	21	17
PYO375	Pyomyositis	97.99	98.55	95.71	94.73	82.13	74.92	89.57	phiSLT	99.9	1	1	55	36	59	56	29	20	57
PYO3986	Pyomyositis	98.08	97.55	89.25	91.33	78.67	74.27	88.98	phiSLT	99.9	1	1	20	3	24	19	34	25	20
PYO3996	Pyomyositis	98.1	97.55	88.98	91.32	78.62	74.27	88.95	phiSLT	99.9	1	1	8	2	13	9	25	16	10
PYO407	Pyomyositis	99.42	97.47	90.76	91.76	79.51	74.65	88.02	phiSLT	99.8	1	1	8	3	18	14	34	18	11
PYO409	Pyomyositis	99.68	97.56	88.77	91.78	78.29	74.71	88.46	phiSLT	99.8	1	1	15	3	20	18	36	21	17
PYO4092	Pyomyositis	99.47	97.56	88.8	91.81	78.22	74.73	88.48	phiSLT	99.8	1	1	15	3	21	19	34	21	17
PYO4096	Pyomyositis	99.61	97.44	90.64	91.73	79.61	74.74	88.42	phiSLT	99.8	1	1	19	7	24	22	44	25	21
PYO425	Pyomyositis	88.83	97.37	94.31	90.52	44.06	56.18	88.49	phiSLT	99.9	1	1	12	2	10	12	26	13	9
PYO430	Pyomyositis	99.33	97.43	90.65	91.77	78.7	75.68	88.98	phiSLT	99.8	1	1	19	3	24	20	38	23	18
PYO432	Pyomyositis	99.42	97.45	89.34	91.82	83.24	76.89	88.01	phiSLT	99.8	1	1	15	5	24	21	45	27	17
PYO455	Pyomyositis	95.08	97.55	88.96	89.26	78.35	76.72	89.88	phiSLT	99.9	1	1	7	2	12	10	23	17	12
PYO461	Pyomyositis	99.45	97.56	88.73	91.78	78.05	74.61	88.04	phiSLT	99.8	1	1	3	2	13	10	26	12	8
PYO465	Pyomyositis	99.66	97.57	90.71	91.78	77.18	75.69	89.01	phiSLT	99.8	1	1	14	3	20	17	41	23	14
PYO477	Pyomyositis	99.47	97.56	88.75	91.81	78.05	74.61	88.06	phiSLT	99.8	1	1	3	2	13	10	26	12	8
PYO484	Pyomyositis	99.67	97.56	90.19	91.82	78.2	75.25	88.51	phiSLT	99.8	1	1	12	2	20	15	37	20	15
PYO485	Pyomyositis	99.47	97.52	90.77	91.83	79.41	74.66	88.5	phiSLT	99.8	1	1	11	2	16	14	31	19	12
PYO488	Pyomyositis	99.46	97.56	90.77	91.8	78.59	75.7	89.08	phiSLT	99.8	1	1	19	5	24	21	42	24	18
PYO490	Pyomyositis	12.21	6.01	12.2	9.57	75.96	66.08	13.29	NA	71	0	0	25	5	22	24	41	24	21
PYO507	Pyomyositis	99.43	97.47	88.65	91.78	82.44	75.95	88.46	phiSLT	99.8	1	1	16	4	23	18	45	25	18
PYO545	Pyomyositis	99.42	97.56	88.75	91.87	78.34	74.7	88.48	phiSLT	99.8	1	1	16	3	21	18	37	22	18
PYO554	Pyomyositis	99.61	97.4	90.59	91.73	79.24	74.76	87.97	phiSLT	99.8	1	1	10	3	18	16	33	17	14
PYO562	Pyomyositis	22.15	12.84	23.61	23.72	84.42	96.87	21.95	phiPVL	99.7	1	1	26	4	19	19	41	28	20
PYO573	Pyomyositis	99.44	97.56	90.77	91.8	78.22	75.71	89.08	phiSLT	99.8	1	1	17	4	23	19	41	25	17
PYO578	Pyomyositis	99.64	97.47	89.38	92.34	78.07	75.48	88.67	phiSLT	99.8	1	1	13	5	22	22	43	23	18
PYO582	Pyomyositis	99.72	97.55	89.59	91.81	81.01	75.83	88.66	phiSLT	99.8	1	1	13	4	22	17	41	26	16
PYO585	Pyomyositis	99.61	97.4	88.77	91.69	80.59	75.82	88.44	phiSLT	99.8	1	1	11	3	17	15	37	21	14
PYO588	Pyomyositis	99.44	97.52	91.29	91.85	79.85	75.67	88.6	phiSLT	99.8	1	1	14	4	23	19	44	24	16
PYO596	Pyomyositis	95.92	97.54	88.43	90.46	78.83	92.46	89.93	phiSLT	99.9	1	1	17	4	24	19	45	24	18
PYO598	Pyomyositis	99.7	97.56	88.74	91.8	78.07	74.61	88.05	phiSLT	99.8	1	1	3	2	13	9	27	12	8
PYO603	Pyomyositis	11.61	3.69	10.17	7.72	69.28	64.15	10.18	NA	77.1	0	0	15	3	12	12	28	13	14
PYO671	Pyomyositis	87.76	97.68	89.42	87.51	55.7	46.45	89.18	phiSLT	99.8	1	1	25	6	21	21	36	26	24
PYO676	Pyomyositis	95.12	97.54	89.08	89.23	78.34	76.89	89.84	phiSLT	99.9	1	1	17	3	21	18	29	24	20
PYO685	Pyomyositis	99.48	97.55	89.16	91.83	81.82	75.75	88.52	phiSLT	99.8	1	1	13	4	19	17	40	27	15
PYO691	Pyomyositis	99.46	97.5	88.74	91.8	78.11	74.62	88.05	phiSLT	99.8	1	1	4	3	14	10	26	12	9
PYO722	Pyomyositis	99.61	97.42	90.64	91.73	79.58	74.74	88.41	phiSLT	99.8	1	1	18	7	23	21	42	24	20
PYO748	Pyomyositis	98.29	97.52	92.26	91.41	79.22	75.48	89.05	phiSLT	99.9	1	1	15	2	20	17	41	25	16
PYO751	Pyomyositis	88.67	98.76	99.72	90.82	59.21	59.28	89.44	phiSa2USA	100	1	1	29	9	21	26	39	25	24
PYO757	Pyomyositis	99.49	97.56	90.68	91.81	77.79	74.83	88.6	phiSLT	99.8	1	1	3	2	13	10	26	14	8
PYO782	Pyomyositis	99.46	97.54	88.76	91.81	80.64	75.84	88.05	phiSLT	99.8	1	1	9	4	18	16	37	22	14
PYO877	Pyomyositis	99.69	97.56	88.74	91.79	78.05	74.61	88.04	phiSLT	99.8	1	1	3	2	13	10	26	12	8
PYO891	Pyomyositis	8.6	3.76	10.86	9.36	62.88	80.03	11.52	NA	74.8	0	0	15	3	12	10	18	10	13
PYO924	Pyomyositis	99.46	97.56	89.3	91.86	82.06	75.75	88.07	phiSLT	99.8	1	1	14	6	22	20	43	24	16
PYO925	Pyomyositis	99.43	97.56	88.7	91.81	78.05	74.48	88.5	phiSLT	99.8	1	1	5	2	14	11	27	14	9
PYO959	Pyomyositis	99.72	97.56	88.76	91.82	77.92	74.64	88.07	phiSLT	99.8	1	1	4	3	14	10	26	13	9
PYO971	Pyomyositis	99.38	97.44	90.6	91.74	79.4	74.73	87.99	phiSLT	99.8	1	1	11	6	19	17	34	19	15
PYO977	Pyomyositis	99.68	97.55	90.67	91.78	77.9	75.71	89.01	phiSLT	99.8	1	1	8	1	17	13	38	20	11
