# Supplementary material for: Panton–Valentine leucocidin is the key determinant of Staphylococcus aureus pyomyositis in a bacterial GWAS
Source: eLife journal article supplement (doi:10.7554/elife.42486), 2019-02-22
Supplement: supp [file elife-42486-supp-v1.zip › elife_poa_e42486_Supplementary_File_4.csv]

Isolate name	Year of isolation	Case/control status
2012_1	2012	Control
2012_100	2012	Control
2012_1001	2012	Control
2012_1002	2012	Control
2012_1004	2012	Control
2012_1006	2012	Control
2012_1009	2012	Control
2012_1012	2012	Control
2012_1014	2012	Control
2012_1020	2012	Control
2012_1021	2012	Control
2012_1023	2012	Control
2012_1025	2012	Control
2012_1029	2012	Control
2012_1030	2012	Control
2012_1038	2012	Control
2012_1040	2012	Control
2012_1041	2012	Control
2012_1042	2012	Control
2012_1044	2012	Control
2012_1047	2012	Control
2012_1048	2012	Control
2012_1056	2012	Control
2012_1057	2012	Control
2012_1082	2012	Control
2012_119	2012	Control
2012_121	2012	Control
2012_127	2012	Control
2012_131	2012	Control
2012_150	2012	Control
2012_153	2012	Control
2012_157	2012	Control
2012_162	2012	Control
2012_173	2012	Control
2012_178	2012	Control
2012_183	2012	Control
2012_186	2012	Control
2012_19	2012	Control
2012_195	2012	Control
2012_201	2012	Control
2012_203	2012	Control
2012_204	2012	Control
2012_210	2012	Control
2012_219	2012	Control
2012_222	2012	Control
2012_231	2012	Control
2012_232	2012	Control
2012_24	2012	Control
2012_240	2012	Control
2012_241	2012	Control
2012_242	2012	Control
2012_246	2012	Control
2012_249	2012	Control
2012_25	2012	Control
2012_250	2012	Control
2012_26	2012	Control
2012_266	2012	Control
2012_282	2012	Control
2012_298	2012	Control
2012_299	2012	Control
2012_301	2012	Control
2012_31	2012	Control
2012_310	2012	Control
2012_319	2012	Control
2012_320	2012	Control
2012_324	2012	Control
2012_327	2012	Control
2012_330	2012	Control
2012_336	2012	Control
2012_339	2012	Control
2012_345	2012	Control
2012_356.1	2012	Control
2012_358	2012	Control
2012_360	2012	Control
2012_368	2012	Control
2012_384	2012	Control
2012_385	2012	Control
2012_391	2012	Control
2012_396	2012	Control
2012_401	2012	Control
2012_407	2012	Control
2012_409	2012	Control
2012_415	2012	Control
2012_417	2012	Control
2012_422	2012	Control
2012_427	2012	Control
2012_428	2012	Control
2012_429	2012	Control
2012_430	2012	Control
2012_434	2012	Control
2012_440	2012	Control
2012_441	2012	Control
2012_449	2012	Control
2012_450	2012	Control
2012_456	2012	Control
2012_460	2012	Control
2012_476	2012	Control
2012_490	2012	Control
2012_515	2012	Control
2012_544	2012	Control
2012_553	2012	Control
2012_555	2012	Control
2012_572	2012	Control
2012_576	2012	Control
2012_579	2012	Control
2012_584	2012	Control
2012_586	2012	Control
2012_597	2012	Control
2012_598	2012	Control
2012_60	2012	Control
2012_613	2012	Control
2012_62	2012	Control
2012_620	2012	Control
2012_622	2012	Control
2012_624	2012	Control
2012_628	2012	Control
2012_634	2012	Control
2012_636	2012	Control
2012_638	2012	Control
2012_646	2012	Control
2012_654	2012	Control
2012_660	2012	Control
2012_661	2012	Control
2012_67	2012	Control
2012_670	2012	Control
2012_671	2012	Control
2012_679	2012	Control
2012_680	2012	Control
2012_687	2012	Control
2012_689	2012	Control
2012_690	2012	Control
2012_692	2012	Control
2012_697	2012	Control
2012_699	2012	Control
2012_702	2012	Control
2012_711	2012	Control
2012_723	2012	Control
2012_727	2012	Control
2012_731	2012	Control
2012_739	2012	Control
2012_740	2012	Control
2012_741	2012	Control
2012_75	2012	Control
2012_751	2012	Control
2012_756	2012	Control
2012_763.1	2012	Control
2012_770	2012	Control
2012_771	2012	Control
2012_788	2012	Control
2012_791	2012	Control
2012_794	2012	Control
2012_795	2012	Control
2012_796	2012	Control
2012_798	2012	Control
2012_8	2012	Control
2012_800	2012	Control
2012_802	2012	Control
2012_830	2012	Control
2012_838	2012	Control
2012_839	2012	Control
2012_844	2012	Control
2012_845	2012	Control
2012_855	2012	Control
2012_861	2012	Control
2012_864	2012	Control
2012_869	2012	Control
2012_870.1	2012	Control
2012_874	2012	Control
2012_875	2012	Control
2012_883	2012	Control
2012_893	2012	Control
2012_895	2012	Control
2012_898	2012	Control
2012_899	2012	Control
2012_90	2012	Control
2012_910	2012	Control
2012_921	2012	Control
2012_926	2012	Control
2012_931	2012	Control
2012_934	2012	Control
2012_94	2012	Control
2012_946	2012	Control
2012_950	2012	Control
2012_951	2012	Control
2012_953	2012	Control
2012_962	2012	Control
2012_965	2012	Control
2012_970	2012	Control
2012_971.1	2012	Control
2012_974	2012	Control
2012_977	2012	Control
2012_986	2012	Control
2012_988	2012	Control
2012_995	2012	Control
2012_997	2012	Control
2012_998	2012	Control
COP1008	2008	Control
COP1019	2008	Control
COP1020	2008	Control
COP1021	2008	Control
COP1030	2008	Control
COP1031	2008	Control
COP1033	2008	Control
COP1041	2008	Control
COP1043	2008	Control
COP1072	2008	Control
COP1079	2008	Control
COP1084	2008	Control
COP1097	2008	Control
COP1105	2008	Control
COP1118	2008	Control
COP1125	2008	Control
COP1138	2008	Control
COP1151	2008	Control
COP1152	2008	Control
COP1166	2008	Control
COP1167	2008	Control
COP1183	2008	Control
COP1189	2008	Control
COP1207	2008	Control
COP1237	2008	Control
COP1245	2008	Control
COP1249	2008	Control
COP1253	2008	Control
COP1272	2008	Control
COP1281	2008	Control
COP1308	2008	Control
COP1312	2008	Control
COP1316	2008	Control
COP1338	2008	Control
COP1342	2008	Control
COP1348	2008	Control
COP136	2008	Control
COP1372	2008	Control
COP1378	2008	Control
COP1407	2008	Control
COP1413	2008	Control
COP1433	2008	Control
COP1455	2008	Control
COP1458	2008	Control
COP1477	2008	Control
COP1496	2008	Control
COP1498	2008	Control
COP1514	2008	Control
COP1525	2008	Control
COP1527	2008	Control
COP153	2008	Control
COP1534	2008	Control
COP155	2008	Control
COP1576	2008	Control
COP1579	2008	Control
COP158	2008	Control
COP1589	2008	Control
COP160	2008	Control
COP1609	2008	Control
COP161	2008	Control
COP1613	2008	Control
COP1621	2008	Control
COP1629	2008	Control
COP1632	2008	Control
COP1646	2008	Control
COP1657	2008	Control
COP1659	2008	Control
COP166	2008	Control
COP1660	2008	Control
COP1662	2008	Control
COP1671	2008	Control
COP1701	2008	Control
COP1706	2008	Control
COP1736	2008	Control
COP1777	2008	Control
COP1785	2008	Control
COP1819	2008	Control
COP1840	2008	Control
COP1846	2008	Control
COP1854	2008	Control
COP1871	2008	Control
COP1878	2008	Control
COP1882	2008	Control
COP1884	2008	Control
COP190	2008	Control
COP1914	2008	Control
COP192	2008	Control
COP193	2008	Control
COP1939	2008	Control
COP1947	2008	Control
COP196	2008	Control
COP1960	2008	Control
COP1967	2008	Control
COP1975	2008	Control
COP198	2008	Control
COP1981	2008	Control
COP1982	2008	Control
COP1996	2008	Control
COP2019	2008	Control
COP2027	2008	Control
COP2028	2008	Control
COP2031	2008	Control
COP2041	2008	Control
COP2046	2008	Control
COP2047	2008	Control
COP2051	2008	Control
COP2053	2008	Control
COP2081	2008	Control
COP2103	2008	Control
COP2106	2008	Control
COP2108	2008	Control
COP2109	2008	Control
COP2120	2008	Control
COP2138	2008	Control
COP2139	2008	Control
COP214	2008	Control
COP2143	2008	Control
COP2154	2008	Control
COP2165	2008	Control
COP2175	2008	Control
COP2179	2008	Control
COP2180	2008	Control
COP2193	2008	Control
COP2214	2008	Control
COP2232	2008	Control
COP2233	2008	Control
COP2245	2008	Control
COP2266	2008	Control
COP2280	2008	Control
COP2282	2008	Control
COP2284	2008	Control
COP2285	2008	Control
COP2291	2008	Control
COP2299	2008	Control
COP2303	2008	Control
COP2311	2008	Control
COP2315	2008	Control
COP2326	2008	Control
COP2338	2008	Control
COP2358	2008	Control
COP2367	2008	Control
COP2368	2008	Control
COP2371	2008	Control
COP2375	2008	Control
COP2376	2008	Control
COP2382	2008	Control
COP2388	2008	Control
COP2400	2008	Control
COP2427	2008	Control
COP2431	2008	Control
COP2432	2008	Control
COP245	2008	Control
COP2464	2008	Control
COP2483	2008	Control
COP2492	2008	Control
COP2496	2008	Control
COP2519	2008	Control
COP2530	2008	Control
COP2531	2008	Control
COP2532	2008	Control
COP2543	2008	Control
COP2544	2008	Control
COP255	2008	Control
COP259	2008	Control
COP285	2008	Control
COP295	2008	Control
COP301	2008	Control
COP313	2008	Control
COP322	2008	Control
COP327	2008	Control
COP349	2008	Control
COP357	2008	Control
COP362	2008	Control
COP39	2008	Control
COP434	2008	Control
COP442	2008	Control
COP45	2008	Control
COP463	2008	Control
COP469	2008	Control
COP49	2008	Control
COP490	2008	Control
COP493	2008	Control
COP496	2008	Control
COP512	2008	Control
COP513	2008	Control
COP542	2008	Control
COP548	2008	Control
COP55	2008	Control
COP561	2008	Control
COP569	2008	Control
COP580	2008	Control
COP584	2008	Control
COP596	2008	Control
COP601	2008	Control
COP605	2008	Control
COP609	2008	Control
COP622	2008	Control
COP637	2008	Control
COP638	2008	Control
COP678	2008	Control
COP680	2008	Control
COP693	2008	Control
COP71	2008	Control
COP714	2008	Control
COP720	2008	Control
COP723	2008	Control
COP727	2008	Control
COP744	2008	Control
COP770	2008	Control
COP780	2008	Control
COP820	2008	Control
COP838	2008	Control
COP848	2008	Control
COP850	2008	Control
COP867	2008	Control
COP905	2008	Control
COP932	2008	Control
COP946	2008	Control
COP948	2008	Control
COP974	2008	Control
COP975	2008	Control
COP980	2008	Control
PYO1007	2008	Case
PYO1132	2008	Case
PYO1146	2008	Case
PYO1224	2008	Case
PYO1225	2008	Case
PYO1230	2008	Case
PYO1232	2008	Case
PYO1268	2008	Case
PYO1296	2009	Case
PYO1300	2009	Case
PYO1350	2009	Case
PYO1354	2009	Case
PYO1391	2009	Case
PYO1536	2009	Case
PYO1544	2009	Case
PYO1551	2009	Case
PYO1627	2009	Case
PYO1702	2009	Case
PYO1709	2009	Case
PYO1823	2010	Case
PYO1862	2010	Case
PYO1952	2010	Case
PYO2095	2010	Case
PYO2134	2010	Case
PYO2151	2010	Case
PYO2160	2010	Case
PYO2244	2010	Case
PYO2416	2010	Case
PYO2492	2010	Case
PYO2502	2010	Case
PYO2506	2010	Case
PYO2530	2010	Case
PYO2767	2009	Case
PYO2785	2009	Case
PYO2789	2009	Case
PYO2844	2009	Case
PYO2846	2009	Case
PYO2866	2009	Case
PYO2874	2009	Case
PYO2923	2011	Case
PYO2994	2011	Case
PYO3032	2011	Case
PYO3085	2011	Case
PYO3092	2011	Case
PYO3195	2011	Case
PYO3206	2011	Case
PYO3233	2011	Case
PYO3366	2011	Case
PYO3415	2011	Case
PYO3422	2011	Case
PYO351	2007	Case
PYO352	2007	Case
PYO353	2007	Case
PYO3540	2011	Case
PYO356	2007	Case
PYO3655	2011	Case
PYO375	2007	Case
PYO3986	2011	Case
PYO3996	2011	Case
PYO407	2007	Case
PYO409	2007	Case
PYO4092	2011	Case
PYO4096	2011	Case
PYO425	2007	Case
PYO430	2007	Case
PYO432	2007	Case
PYO455	2007	Case
PYO461	2007	Case
PYO465	2007	Case
PYO477	2007	Case
PYO484	2007	Case
PYO485	2007	Case
PYO488	2007	Case
PYO490	2007	Case
PYO507	2007	Case
PYO545	2007	Case
PYO554	2007	Case
PYO562	2007	Case
PYO573	2007	Case
PYO578	2007	Case
PYO582	2007	Case
PYO585	2007	Case
PYO588	2007	Case
PYO596	2007	Case
PYO598	2007	Case
PYO603	2007	Case
PYO671	2007	Case
PYO676	2007	Case
PYO685	2007	Case
PYO691	2007	Case
PYO722	2007	Case
PYO748	2007	Case
PYO751	2007	Case
PYO757	2007	Case
PYO782	2007	Case
PYO877	2008	Case
PYO891	2008	Case
PYO924	2008	Case
PYO925	2008	Case
PYO959	2008	Case
PYO971	2008	Case
PYO977	2008	Case
