# Supplementary figures and images for: Panton–Valentine leucocidin is the key determinant of Staphylococcus aureus pyomyositis in a bacterial GWAS
Source: eLife journal article supplement (doi:10.7554/elife.42486), 2019-02-22

**
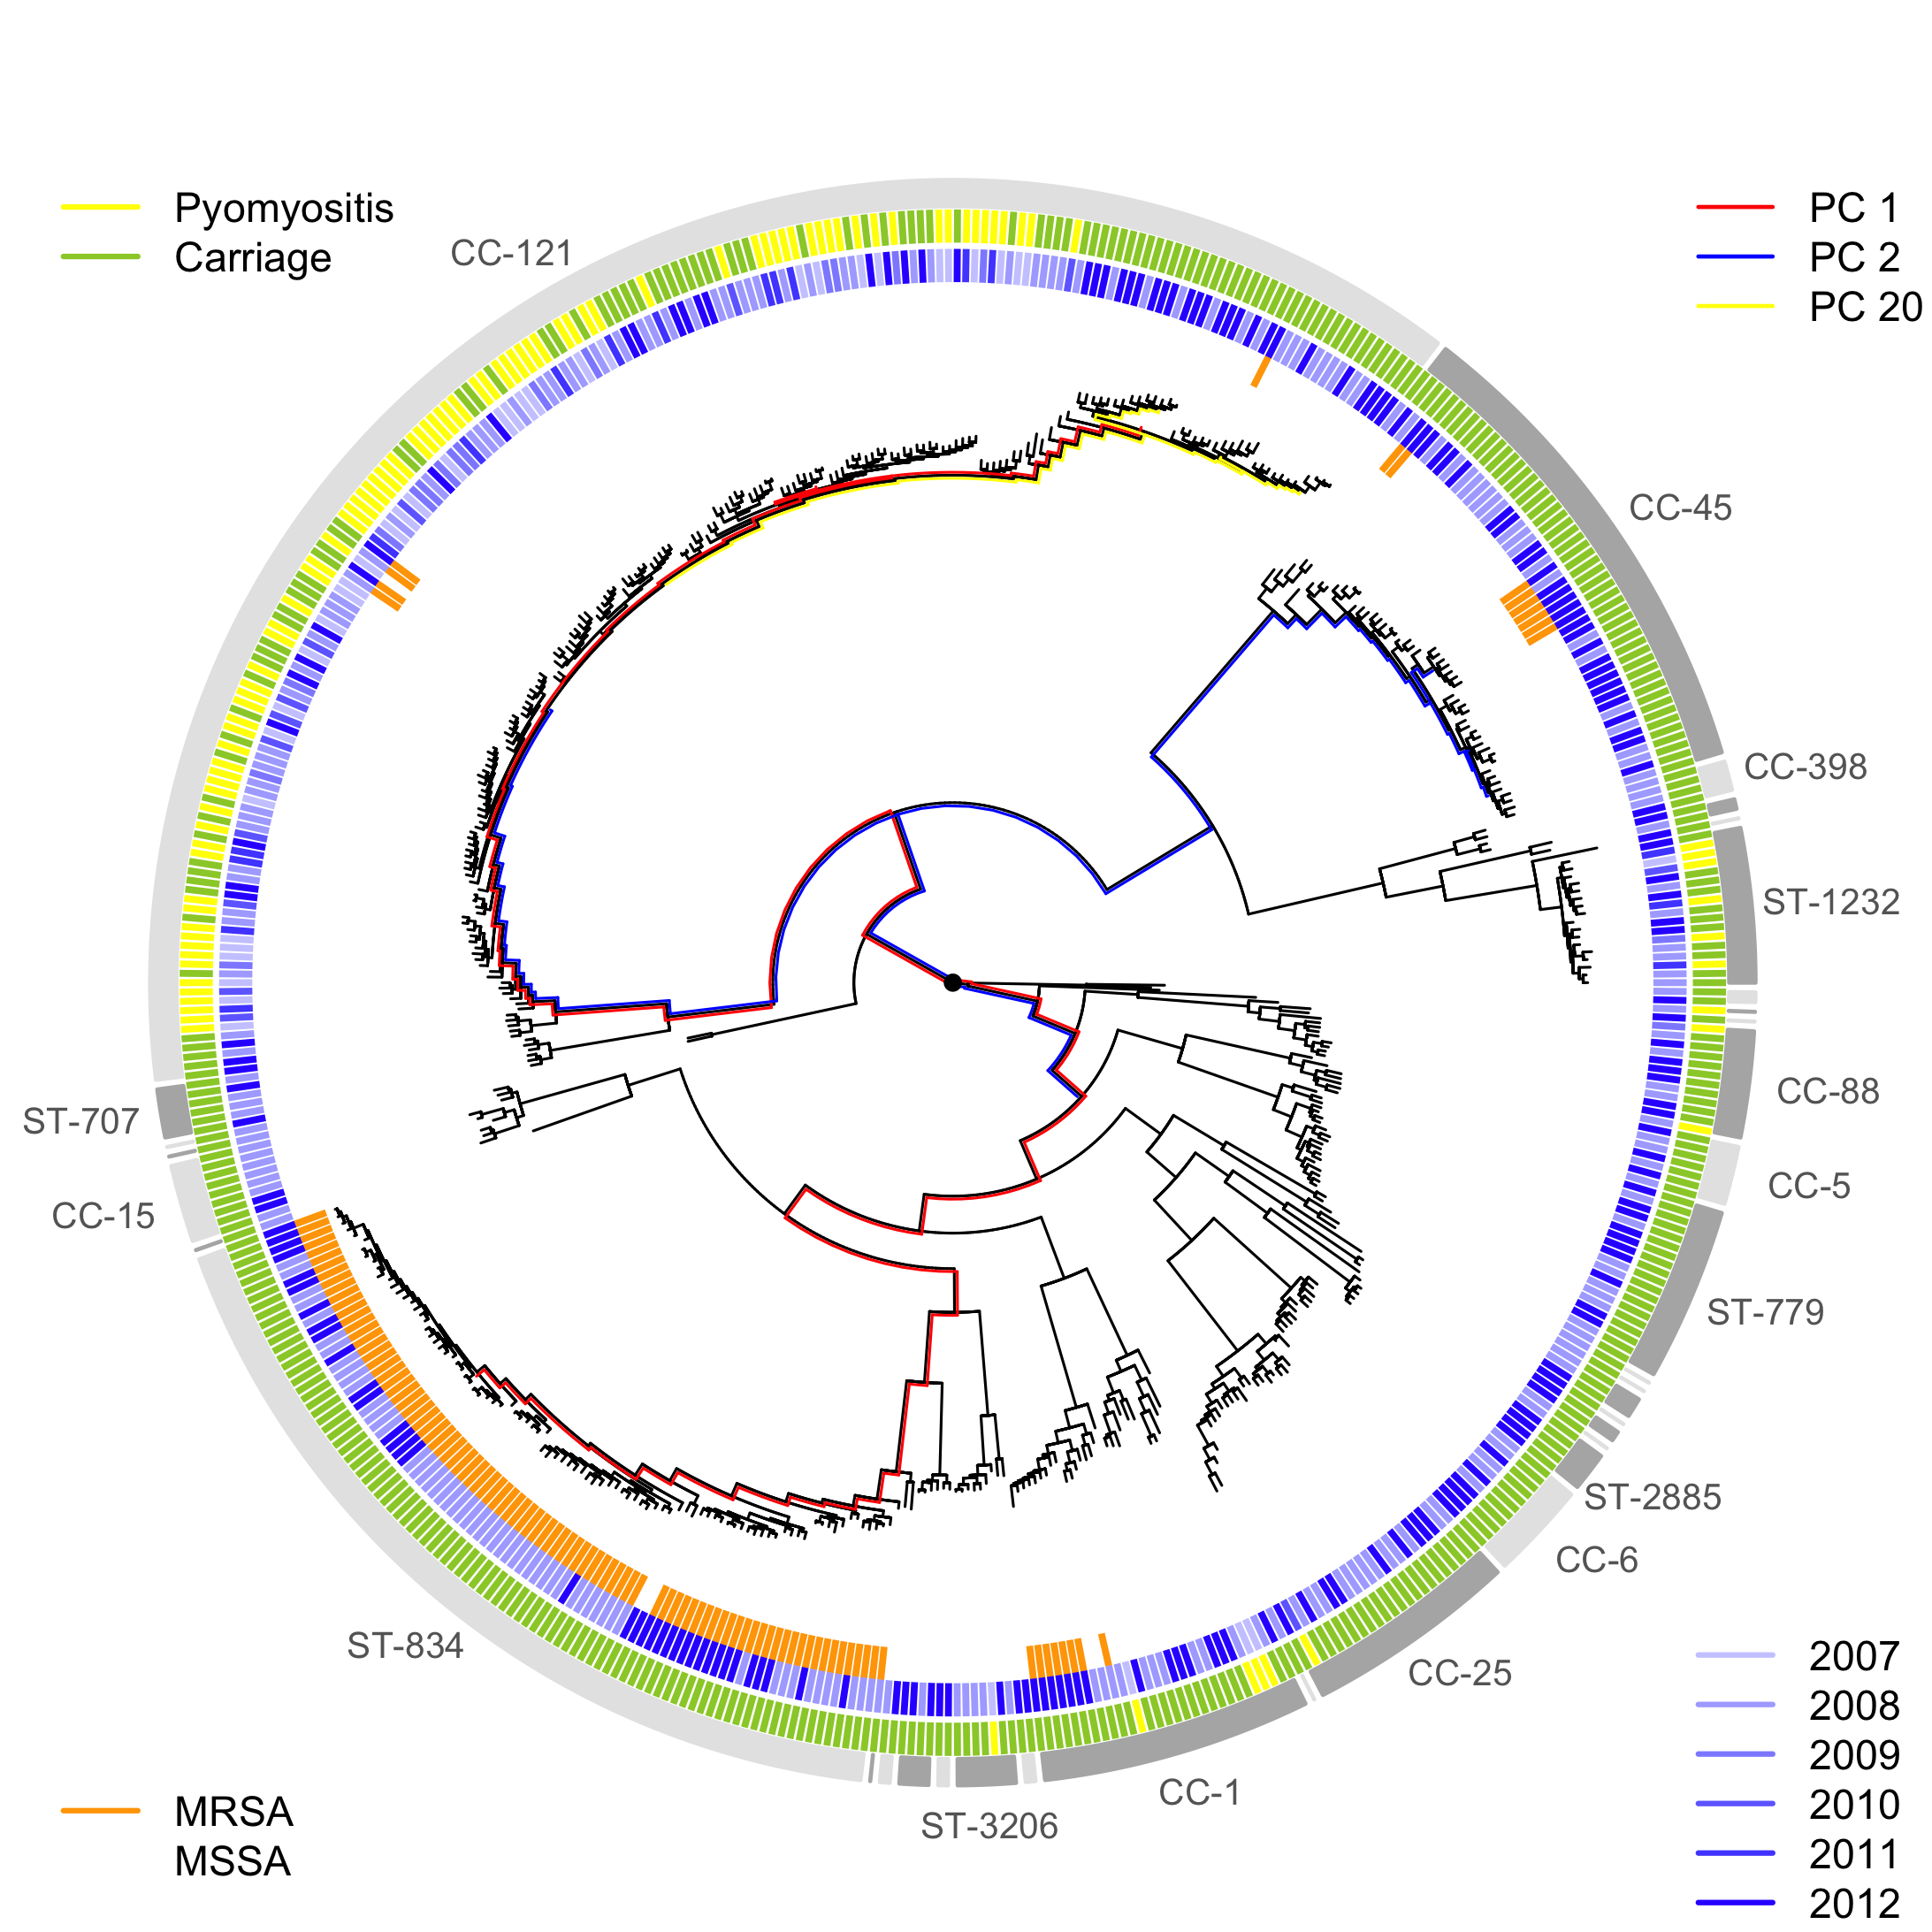
**

**Figure 1-figure supplement 1**

Supplement: supp [file elife_poa_e42486_Figure_1_figure_supplement_1.docx]

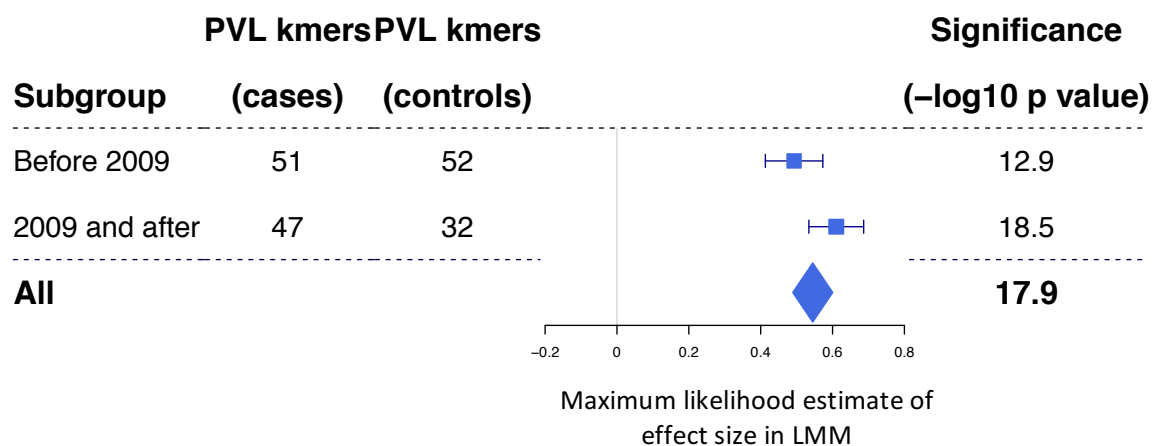

**Figure 2-figure supplement 4**

Supplement: supp [file elife-42486-supp-v1.zip › elife_poa_e42486_Figure_2_figure_supplement_4.pdf]

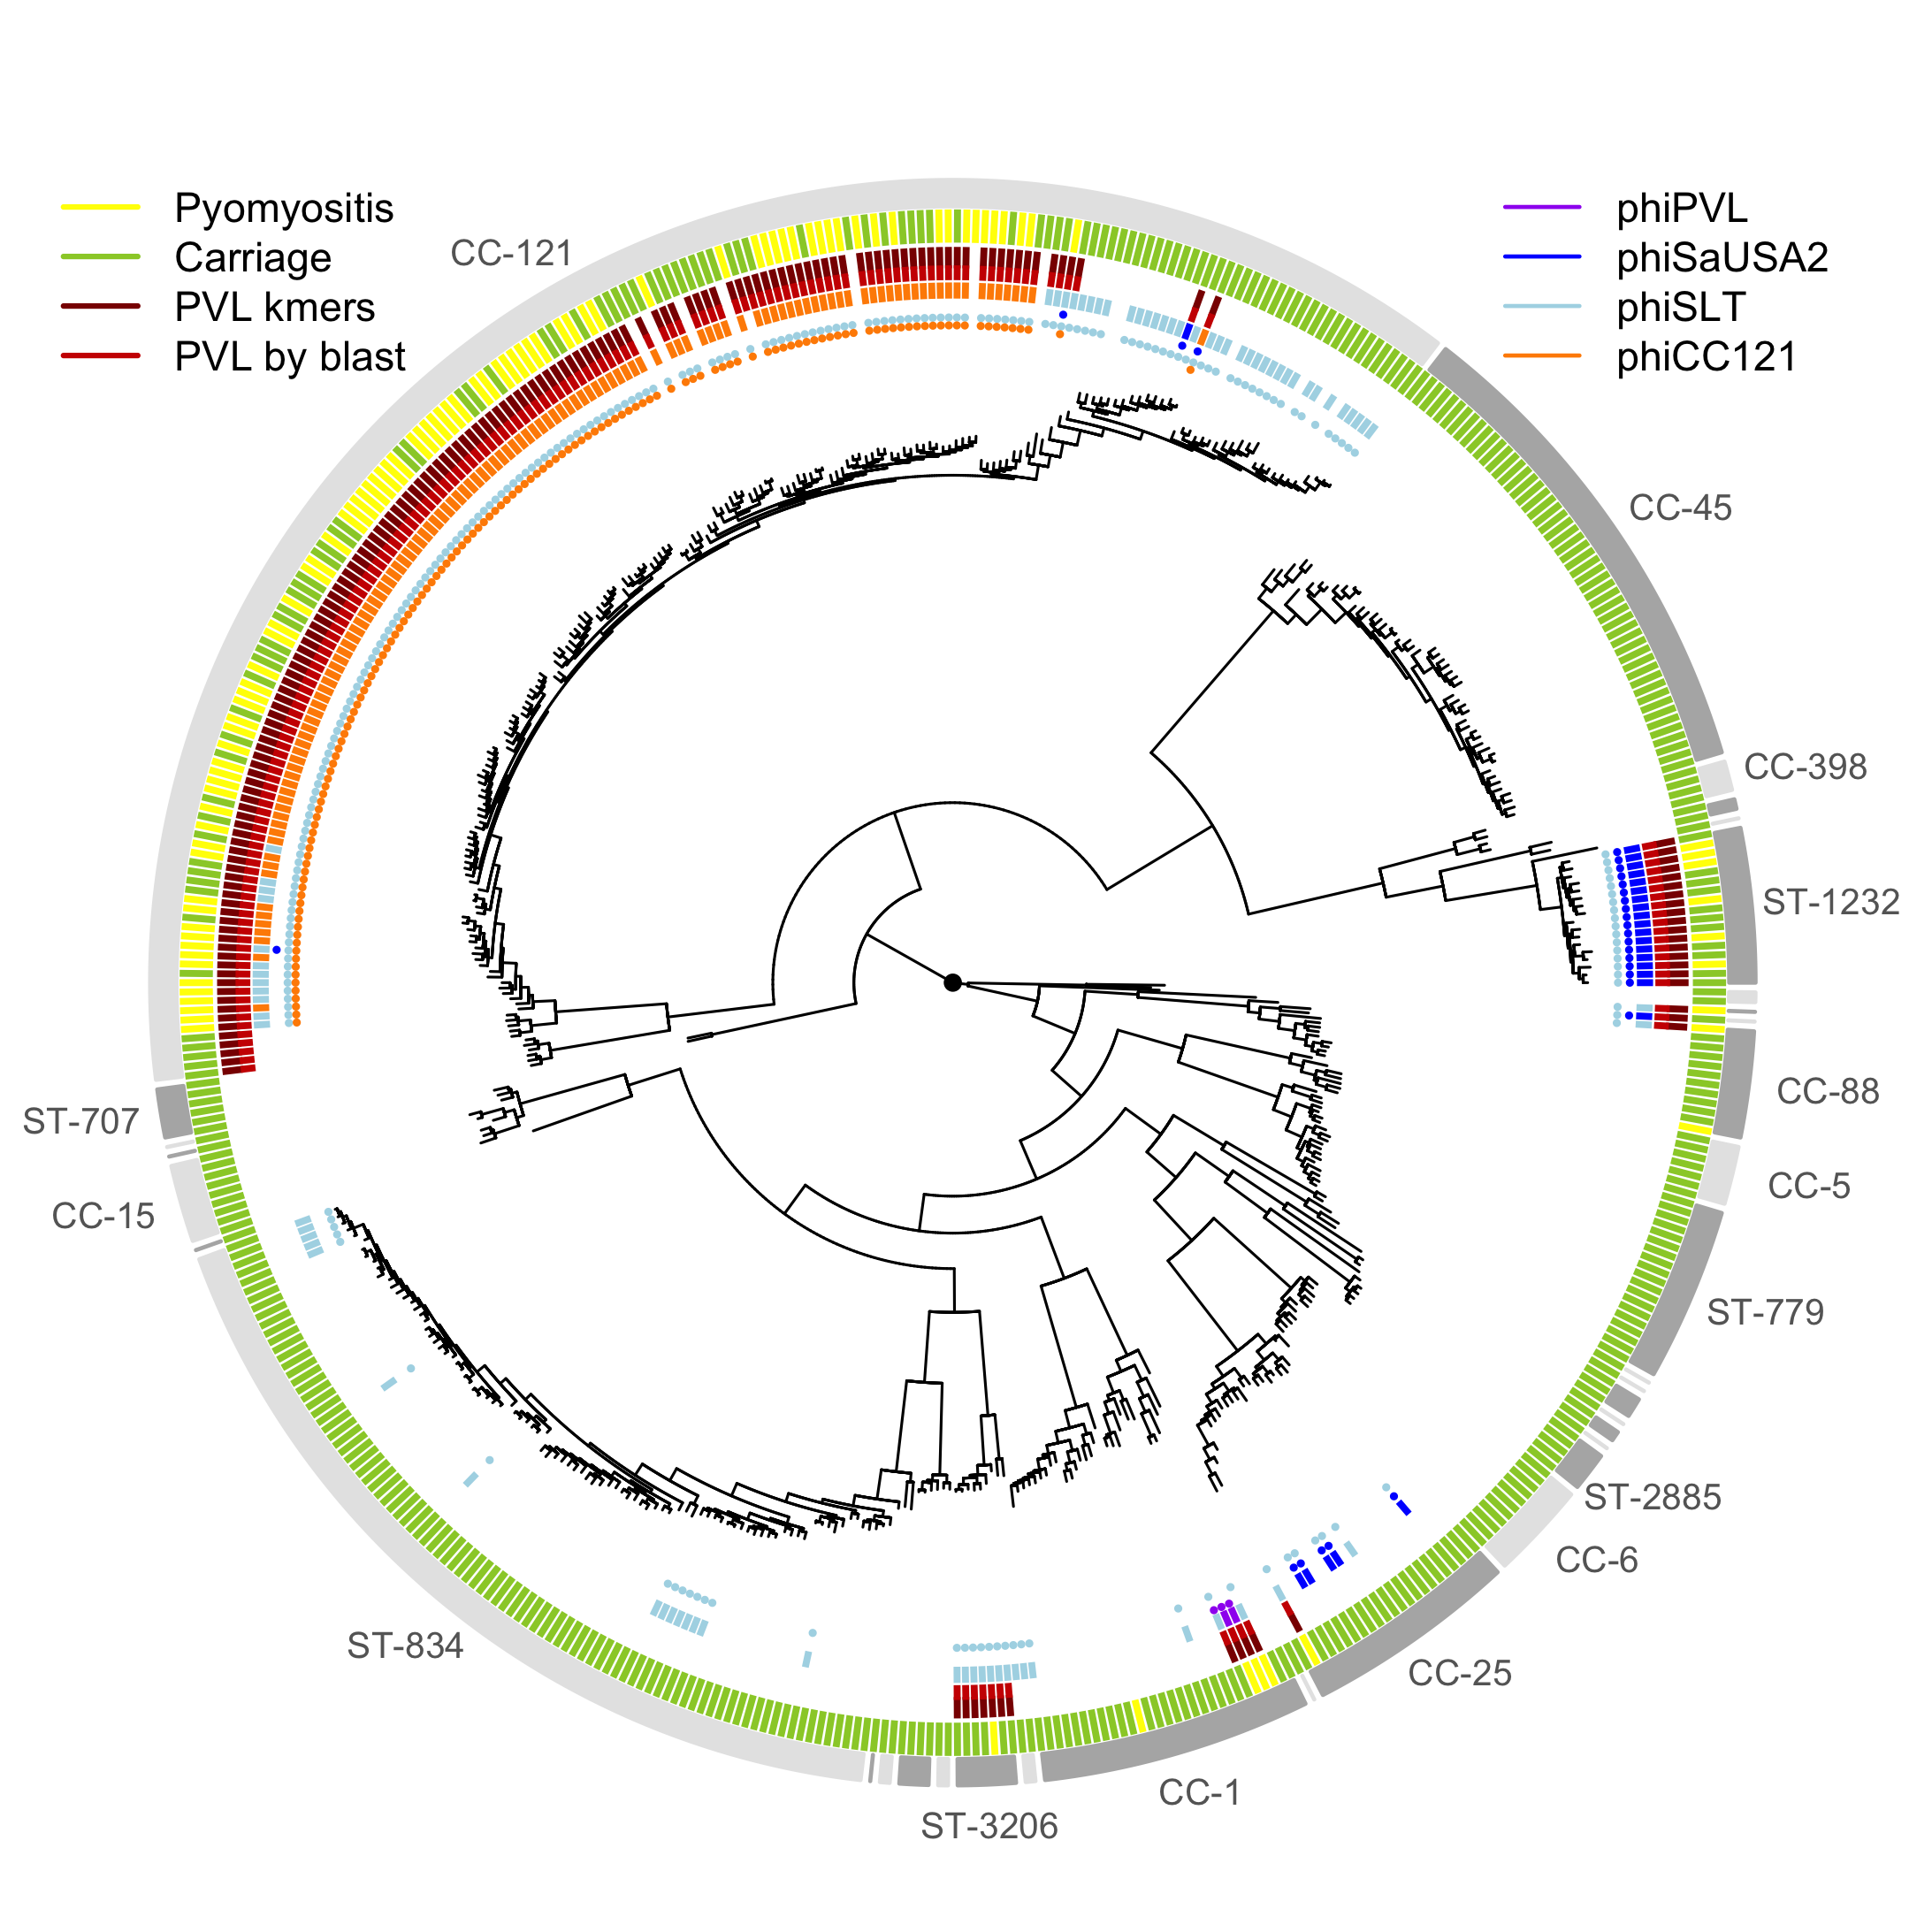


**Figure 2-figure supplement 3**

Supplement: supp [file elife-42486-supp-v1.zip › elife_poa_e42486_Figure_2_figure_supplement_3.docx]

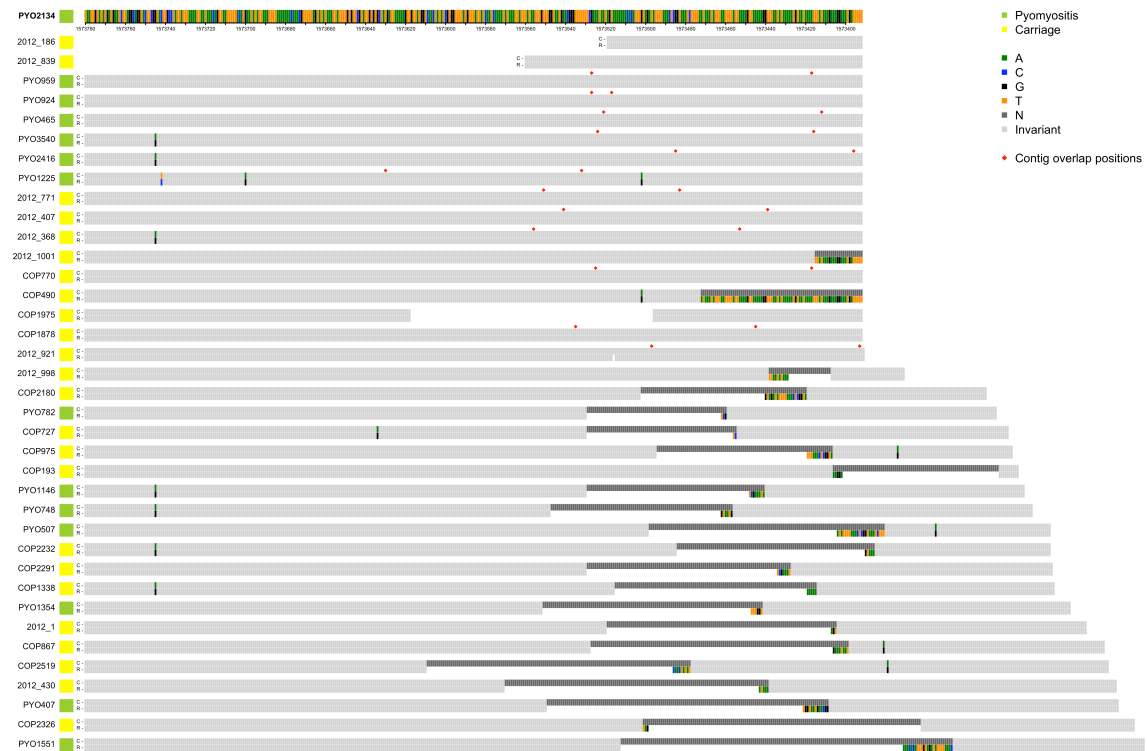

**Figure 2-figure supplement 1**

Supplement: supp [file elife-42486-supp-v1.zip › elife_poa_e42486_Figure_2_figure_supplement_1.pdf]

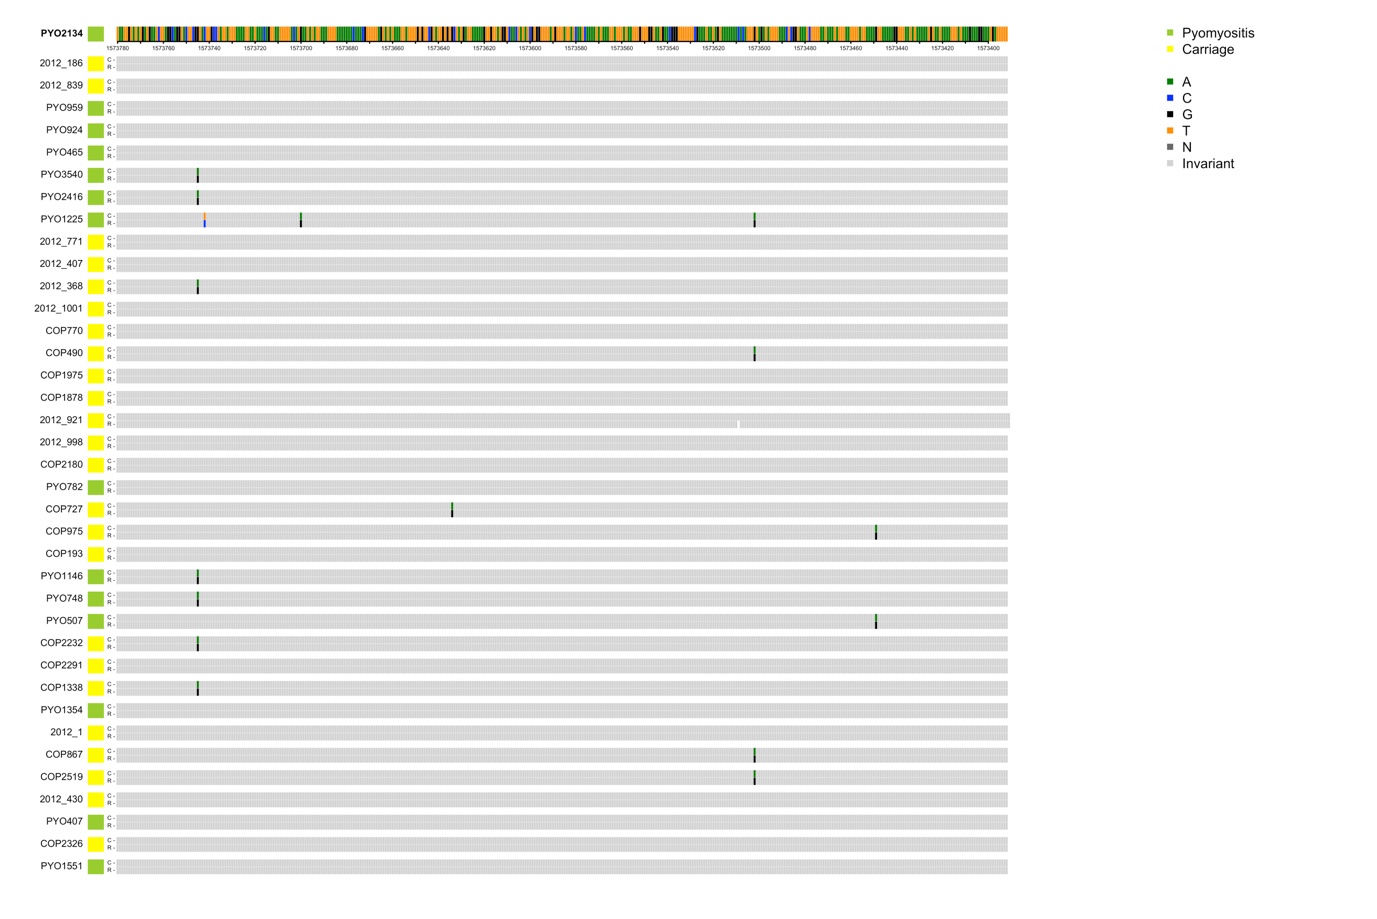


**Figure 2-figure supplement 2**

Supplement: supp [file elife-42486-supp-v1.zip › elife_poa_e42486_Figure_2_figure_supplement_2.docx]
